# Supplementary material for: Cu-Catalyzed and iodine mediated synthesis of thioaurones via in situ C–S bond generation using xanthate as a sulfur surrogate
Source: Royal Society of Chemistry journal article supplement (doi:10.1039/d2ob01211a), 2022-01-01
Supplement: d2ob01211a1.pdf [file d2ob01211a1.pdf]

Supporting information

for

**Cu-Catalyzed and Iodine Mediated Synthesis of Thioaurones via In-situ C-S Bond Generation using Xanthate as Sulfur Surrogate**

Palanisamy Soundarya and Govindasamy Sekar\*

*Department of Chemistry, Indian Institute of Technology Madras, Chennai,*

*Tamilnadu-600 036 India.*

[gsekar@iitm.ac.in](mailto:gsekar@iitm.ac.in)

**Table of contents**

|                                                                     |     |
|---------------------------------------------------------------------|-----|
| 1. General information                                              | 2   |
| 2. Experimental procedure                                           | 2   |
| 3. Experimental data                                                | 6   |
| 4. References                                                       | 16  |
| 5. HRMS data for compound E                                         | 17  |
| 6. <sup>1</sup> H and <sup>13</sup> C NMR spectra for all compounds | 18  |
| 7. Crystal data for <b>2i</b> and <b>2p</b>                         | 104 |

## 1. General information

All the reactions were carried out in oven-dried reaction tubes. Reactions were monitored by thin-layer chromatography (TLC) using Merck silica gel 60 F<sub>254</sub> precoated plates (0.25 mm) and visualized by UV fluorescence quenching using an appropriate mixture of ethyl acetate and hexanes. Silica gel (particle size: 100-200 mesh) was purchased from Avra Synthesis Pvt. Ltd. and used for column chromatography using hexanes and ethyl acetate mixture as eluent. All the reactions were carried out in temperature-controlled IKA magnetic stirrers. <sup>1</sup>H and <sup>13</sup>C NMR spectra were recorded on a Bruker 400 MHz and 500 MHz (100 MHz and 125 MHz for <sup>13</sup>C) instrument. <sup>1</sup>H NMR spectra were reported relative to residual TMS ( $\delta$  0 ppm) and DMSO-d<sub>6</sub> ( $\delta$  2.50 ppm). <sup>13</sup>C NMR spectral data were reported relative to CDCl<sub>3</sub> ( $\delta$  77.16 ppm) and DMSO-d<sub>6</sub> ( $\delta$  39.51 ppm). Chemical shifts were reported in parts per million and multiplicities are as indicated: s (singlet), d (doublet), t (triplet), q (quartet), p (pentet), m (multiplet), and br (broad). Coupling constants (*J*) are reported in Hertz. Melting points were recorded on a Guna capillary melting point apparatus and were corrected with benzoic acid as reference. Infrared spectra were recorded on an FTIR 4000 Series Spectrometer using a dry KBr pellet. The wavenumbers of recorded IR signals are quoted in cm<sup>-1</sup>. High-resolution mass spectra (HRMS) were recorded on Q-Tof of a Micro mass spectrometer.

Solvents used for extraction and column chromatography were laboratory grade and used as received. Solvents for reactions were obtained from Fischer Scientific, India Pvt. Ltd. Various acetophenones were purchased from Alfa-aesar, Sigma-Aldrich Company, Avra synthesis, and Spectrochem Pvt Ltd. CuI, and iodine was purchased from Avra. Potassium ethyl xanthogenate was obtained from Sigma-Aldrich and used directly as received.

### 2.0. General procedure for the synthesis of benzo[*b*]thiophen-3(2*H*)-one derivative.

Under open atmosphere, (*E*)-2-iodochalcone (1.0 mmol), potassium ethyl xanthate (3.0 mmol), Iodine (3.0 mmol), and CuI (0.1 mmol) were successively added to an oven-dried long reaction tube (reaction tube length = 20-30 cm). Then, 1,4-dioxane (4 mL) was added and closed with a glass stopper and sealed with teflon. After that, the reaction tube was immersed in a 120 °C pre-heated oil bath. Then the reaction was monitored by TLC. After completion of the reaction, the reaction mixture was brought to room temperature; saturated Na<sub>2</sub>S<sub>2</sub>O<sub>3</sub> solution was added and extracted with ethyl acetate (3×10 mL). Brine wash (1×20 mL) was given to the combined organic extractions and dried over anhydrous Na<sub>2</sub>SO<sub>4</sub>. Removal of solvent and silica gel column separation of the crude reaction mixture using hexanes and ethyl acetate mixture (90:10) afforded the corresponding (*Z*)-2-(4-methylbenzylidene)benzo[*b*]thiophen-3(2*H*)-one (2a): 92% yield (116 mg).

The same procedure was followed for the preparation of other benzo[*b*]thiophenone and thioindirubin 5.

## 2.1. General procedure for the scale-up synthesis.

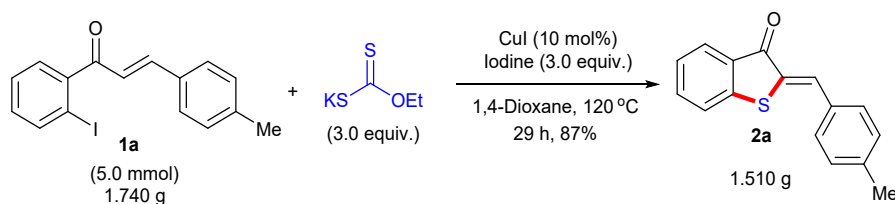

Under open atmosphere, (*E*)-2-iodochalcone (5.0 mmol), potassium ethyl xanthate (15.0 mmol), iodine (15.0 mmol), and CuI (0.5 mmol) were successively added to an oven-dried round bottom flask. Then, 1,4-dioxane (20 mL) was added and connected with a reflux condenser. The round bottom flask was then immersed in a 120 °C pre-heated oil bath. Then the reaction was monitored by TLC. After completion of the reaction, the reaction mixture was brought to room temperature; saturated Na<sub>2</sub>S<sub>2</sub>O<sub>3</sub> solution was added and extracted with ethyl acetate (3×50 mL). Brine wash (1×100 mL) was given to the combined organic extractions and dried over anhydrous Na<sub>2</sub>SO<sub>4</sub>. Removal of solvent and silica gel column separation of the crude reaction mixture using hexanes and ethyl acetate mixture (90:10) afforded the corresponding (*Z*)-2-(4-methylbenzylidene)benzo[*b*]thiophen-3(*2H*)-one (**2a**) in 87% yield (1.51 g).

## 2.2. Typical procedure for the preparation of (*E*)-1-(2-iodophenyl)-3-(*p*-tolyl)-prop-2-en-1-one (**1a**). 2-Iodoacetophenone (**1a**) was synthesized using reported literature procedure.<sup>1,2</sup>

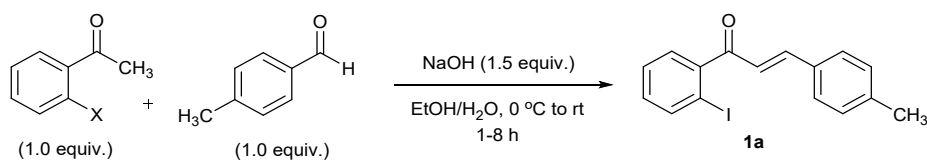

A solution of NaOH (1.2 g, 30 mmol) in a mixture of water (6 mL) and ethanol (100 mL) was cooled to 0°C. 2-Iodoacetophenone (4.9g, 20 mmol) and benzaldehyde (2.04 mL, 20 mmol) were slowly added. The reaction mixture was allowed to warm to room temperature. After completion of the reaction, EtOH was removed under vacuum; water (100 mL) was added and extracted with EtOAc (3×25 mL). Organic extractions were combined and dried over anhydrous Na<sub>2</sub>SO<sub>4</sub>. The solvent was evaporated, and the crude material was purified by column chromatography (hexane/EtOAc 95:05 v/v) to yield the desired product. (*E*)-2-iodochalcone (**1a**): 91% yield; white solid; <sup>1</sup>H NMR (400 MHz, CDCl<sub>3</sub>) δ 7.93 (d, *J* = 8.0 Hz, 1H), 7.48-7.42 (m, 3H), 7.41-7.38 (m, 1H), 7.38-7.35 (m, 1H), 7.21 (d, *J* = 8.0 Hz, 1H), 7.19-7.13 (m, 1H), 7.03 (d, *J* = 16.4 Hz, 1H); <sup>13</sup>C NMR (100 MHz, CDCl<sub>3</sub>) δ 196.4, 147.4, 145.0, 141.8, 140.1, 131.8, 131.3, 129.9, 128.8, 128.6, 128.1, 124.9, 92.3, 21.7.

The same procedure was followed for the preparation of other 2-iodochalcones and 2-bromochalcones.

### 2.3. Preparation of (*Z*)-2-(4-Methylbenzylidene)benzo[*b*]thiophen-3(2*H*)-one 1,1-dioxide (6).

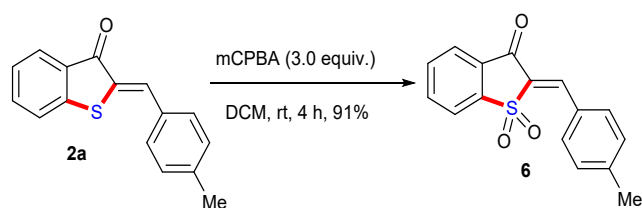

(0.5 mmol) of **2a** was dissolved in dry DCM (3.5 mL) under an N<sub>2</sub> atmosphere in an oven-dried reaction tube with a pellet. To this mCPBA (1.5 mmol) was added and stirred at room temperature for 4h. After completion, the reaction mixture was diluted with DCM (10 mL) and washed with saturated NaHCO<sub>3</sub>. The aqueous layer was extracted with DCM (10 mL) twice. Then combined organic layer was washed with brine solution and dried over anhydrous sodium sulfate, and concentrated in a vacuum. The residue was purified using column chromatography with hexanes/ethyl acetate (3:1 v/v) as eluent to afford the compound (**6**) in 89% yield. yellow solid; mp 182-184 °C; R<sub>f</sub> = 0.53 (30% ethyl acetate in hexanes); <sup>1</sup>H NMR (CDCl<sub>3</sub>, 400 MHz) δ 8.11 (d, *J* = 7.6 Hz 1H), 8.09-8.04 (m, 3H), 8.03 (s, 1H), 7.93 (t, *J* = 7.6 Hz, 1H), 7.83 (t, *J* = 7.2 Hz, 1H), 7.37 (d, *J* = 8.0 Hz, 2H), 2.46 (s, 3H); <sup>13</sup>C NMR (CDCl<sub>3</sub>, 100 MHz) δ 179.1, 145.6, 144.5, 136.6, 134.2, 134.0, 133.9, 132.5, 130.4, 130.0, 129, 125.0, 121.6, 22.1; FTIR (KBr) 2985, 2254, 1638, 1597, 1287, 734 cm<sup>-1</sup>; HRMS (*m/z*) calculated for C<sub>16</sub>H<sub>13</sub>O<sub>3</sub>S [M+H]<sup>+</sup> : 285.0585; found: 285.0588.

### 2.4. Preparation of (*Z*)-2-(4-methylbenzylidene)-2,3-dihydrobenzo[*b*]thiophen-3-ol (7).

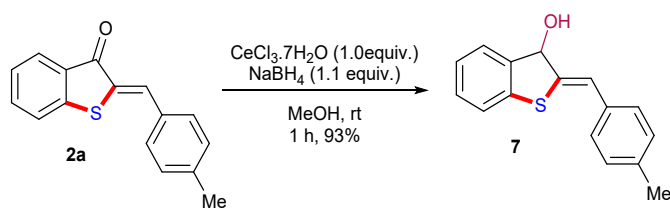

To a stirred solution of  $\alpha,\beta$ -unsaturated ketone **2a** (1.0 mmol) in methanol (5 mL) was added CeCl<sub>3</sub>·7H<sub>2</sub>O (373 mg, 1.0 mmol), the solution was cooled to 0 °C, and NaBH<sub>4</sub> (38 mg, 1.1 mmol) was added. The mixture was stirred at room temperature for 1 h before water was added and extracted with CH<sub>2</sub>Cl<sub>2</sub>. The combined organic phases were dried with Na<sub>2</sub>SO<sub>4</sub>, and the solvents evaporated under a vacuum. Pure compound **7** was obtained in 93% yield after flash chromatography on silica gel. white solid ; mp 66-67 °C; R<sub>f</sub> = 0.47 (20% ethyl acetate in hexanes); FTIR (KBr) 3397, 3055, 2921, 1655, 1613, 1456, 1306, 1250, 1157, 1117, 823, 750 cm<sup>-1</sup>; <sup>1</sup>H NMR (CDCl<sub>3</sub>, 500 MHz) δ 7.75 (d, *J* = 8.0 Hz, 1H), 7.66 (d, *J* = 7.5 Hz, 1H), 7.35 (d, *J* = 8.0 Hz, 2H), 7.32-7.23 (m, 2H), 7.18 (d, *J* = 8.0 Hz, 2H), 7.09 (s, 1H), 6.05 (s, 1H), 2.58 (s, 1H), 2.35 (s, 3H); <sup>13</sup>C NMR

(CDCl<sub>3</sub>, 125 MHz)  $\delta$  149.1, 140.0, 139.8, 139.6, 138.2, 129.4, 126.5, 124.4, 124.3, 123.7, 122.5, 121.2, 73.0, 21.3; HRMS (m/z) [M+NH<sub>4</sub>]<sup>+</sup> calculated for C<sub>16</sub>H<sub>18</sub>NOS : 272.1109; found: 272.1128.

### 2.5.1 Generation of $\alpha$ -keto-stabilized sulfonium ylide (**8**).<sup>3</sup>

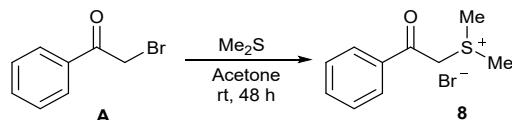

To a 0.5 M solution of bromoketone **A** (5.0 mmol, 1.0 equiv.) in acetone dimethyl sulfide (440  $\mu$ L, 6.0 mmol, 1.2 equiv.) was added, and the mixture was stirred for 48 h at rt. Then, the precipitate of sulfonium salt **8** was separated from the solution, washed with acetone and dried under reduced pressure to give pure sulfonium salt **8**, which was readily converted to the corresponding sulfonium ylides. <sup>1</sup>H NMR (CDCl<sub>3</sub>, 500 MHz)  $\delta$  8.03 (d,  $J$  = 7.5 Hz, 2H), 7.78 (t,  $J$  = 7.5 Hz, 1H), 7.63 (t,  $J$  = 7.5 Hz, 2H), 5.64 (s, 2H), 3.03 (s, 6H); <sup>13</sup>C NMR (CDCl<sub>3</sub>, 125 MHz)  $\delta$  191.4, 135.1, 133.9, 129.2, 128.7, 52.9, 24.6.

### 2.5.2 Preparation of (2*S*,2'*S*,3'*S*)-2'-benzoyl-3'-(*p*-tolyl)-3H-spiro[benzo[*b*]thiophene-2,1'-cyclopropan]-3-one (**9**).

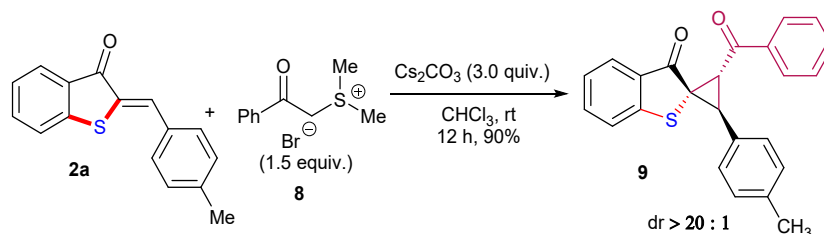

General procedure for the synthesis of **9**. Under Ar atmosphere, to a solution of **2a** (0.5 mmol, 1.0 equiv.) in CHCl<sub>3</sub> 5 mL was added **8** (1.0 mmol, 1.5 equiv.), and Cs<sub>2</sub>CO<sub>3</sub> (1.5 mmol, 3.0 equiv.). The reaction mixture was stirred at rt for 16 h. After the reaction was completed, the reaction mixture was extracted with CH<sub>2</sub>Cl<sub>2</sub> (10 mL $\times$ 3). The combined organic layer was dried over MgSO<sub>4</sub> and concentrated. The residue was purified by column chromatography (ethyl acetate: petroleum ether=1:5) to give the desired products **9** in 90% yield. Yellow solid ; mp 60-62  $^{\circ}$ C;  $R_f$  = 0.47 (10% ethyl acetate in hexanes); FTIR (KBr) 3060, 2923, 2856, 1670, 1592, 1450, 1287, 1216, 1014, 741, 714, 689, 543 cm<sup>-1</sup>; <sup>1</sup>H NMR (CDCl<sub>3</sub>, 500 MHz)  $\delta$  8.15-8.09 (m, 2H), 7.69 (d,  $J$  = 7.5 Hz, 1H), 7.63 (t,  $J$  = 7.5 Hz, 1H), 7.56-7.50 (m, 3H), 7.45 (d,  $J$  = 7.5 Hz, 1H), 7.24 (d,  $J$  = 8.0 Hz, 2H), 7.21-7.17 (m, 1H), 7.13 (d,  $J$  = 8.0 Hz, 2H), 4.41 (d,  $J$  = 16.0 Hz, 1H), 3.97 (d,  $J$  = 7.5 Hz, 1H), 2.33 (s, 3H); <sup>13</sup>C NMR (CDCl<sub>3</sub>, 125 MHz)  $\delta$  195.3, 194.7, 152.1, 137.6, 136.9, 135.1, 134.1, 130.9, 129.3, 129.2, 129.1, 129.0, 128.6,

126.3, 124.8, 124.1, 51.3, 42.3, 37.6, 21.3; HRMS (m/z) [M+H]<sup>+</sup> calculated for C<sub>24</sub>H<sub>19</sub>O<sub>2</sub>S : 371.1093; found: 371.1106.

## 2.6. Preparation of (*E*)-*O*-Ethyl *S*-(2-(3-(*p*-tolyl)acryloyl)phenyl)carbonodithioate (**10**).

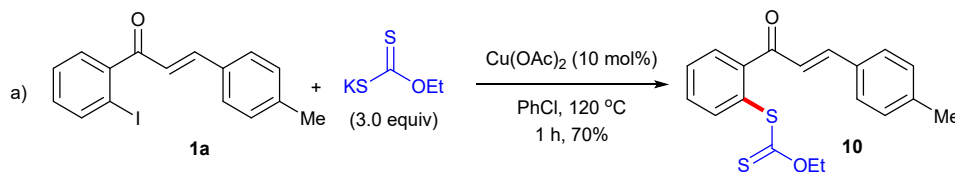

An oven-dried reaction tube was loaded with **1a** (0.5 mmol), potassium ethyl xanthate (1.0 mmol), and Cu(OAc)<sub>2</sub> (0.01 mmol), and then Chlorobenzene (2 mL) was added. The reaction tube was closed with a glass stopper and stirred at 120 °C for one hour. The reaction mixture was brought to room temperature and diluted with ethyl acetate and then washed with brine. The aqueous layer was extracted twice with ethyl acetate, and the combined organic extractions were dried over anhydrous Na<sub>2</sub>SO<sub>4</sub>. The solvent was removed under reduced pressure, and the residue was purified by silica gel column using hexanes/ethyl acetate (85:15, v/v) mixture to afford the **10**.

The same procedure was followed for the preparation of Ethyl-*S*-(2-(3-(*p*-tolyl)propanoyl)phenyl) carbonodithioate **11**.

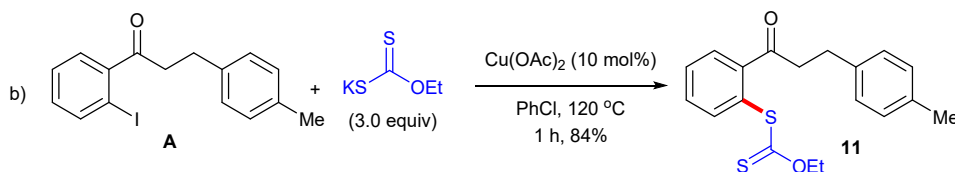

## 4.0. Experimental data.

**(*Z*)-2-(4-Methylbenzylidene)benzo[*b*]thiophen-3(*2H*)-one (**2a**):**<sup>5</sup> 92% yield (117 mg); bright yellow solid; mp 138-39 °C; *R*<sub>f</sub> = 0.47 (5% ethyl acetate in hexanes); FTIR (KBr) 3001, 2912, 1678, 1593, 1273, 752 cm<sup>-1</sup>; <sup>1</sup>H NMR (CDCl<sub>3</sub>, 400 MHz) δ 7.90-7.97 (m, 2H), 7.65-7.58 (m, 2H), 7.56 (d, *J* = 7.2 Hz, 1H), 7.50 (d, *J* = 7.6 Hz, 1H), 7.33-7.24 (m, 3H), 2.41 (s, 3H); <sup>13</sup>C NMR (CDCl<sub>3</sub>, 100 MHz) δ 188.9, 146.2, 141.0, 135.3, 134.0, 131.7, 131.2, 130.7, 130.0, 129.4, 127.1, 125.7, 124.0, 21.8; HRMS (m/z) [M+Na]<sup>+</sup> calculated for C<sub>16</sub>H<sub>12</sub>OSNa : 275.0507; found: 275.0505.

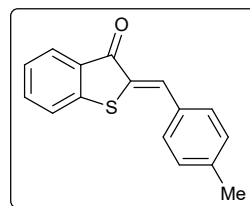

**(*Z*)-2-Benzylidenebenzo[*b*]thiophen-3(*2H*)-one (**2b**):**<sup>4</sup> 70% yield (83 mg); bright yellow solid; mp 131-33 °C; *R*<sub>f</sub> = 0.50 (5% ethyl acetate in hexanes); FTIR (KBr) 3057, 2985, 1681, 1566, 1264, 745 cm<sup>-1</sup>; <sup>1</sup>H NMR (CDCl<sub>3</sub>, 400 MHz) δ 8.01-7.89 (m, 2H), 7.71 (d, *J* = 7.6 Hz, 2H), 7.57 (t, *J* = 7.6 Hz, 1H), 7.53-7.45 (m, 3H), 7.44-7.38

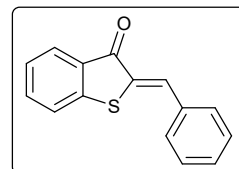

(m, 1H), 7.33-7.25 (m, 1H);  $^{13}\text{C}$  NMR ( $\text{CDCl}_3$ , 100 MHz)  $\delta$  188.9, 146.3, 135.4, 134.4, 133.7, 131.1, 130.6, 130.4, 130.3, 129.2, 127.2, 125.8, 124.1; HRMS ( $m/z$ )  $[\text{M}+\text{Na}]^+$  calculated for  $\text{C}_{15}\text{H}_{10}\text{OSNa}$  : 261.0350; found: 261.0345.

**(Z)-2-(4-(Methylthio)benzylidene)benzo[*b*]thiophen-3(2H)-one (2c):**<sup>6</sup> 86% yield; (122 mg); bright yellow solid; mp 152-154 °C;  $R_f$  = 0.50 (10% ethyl acetate in hexanes); FTIR (KBr) 2993, 1678, 1585, 1273, 748  $\text{cm}^{-1}$ ;  $^1\text{H}$  NMR ( $\text{CDCl}_3$ , 400 MHz)  $\delta$  7.96-7.88 (m, 2H), 7.65-7.54 (m, 3H), 7.50 (d,  $J$  = 8.0 Hz, 1H), 7.34-7.25 (m, 3H), 2.53 (s, 3H);  $^{13}\text{C}$  NMR, ( $\text{CDCl}_3$ , 100 MHz)  $\delta$  188.8, 146.0, 142.6, 135.3, 133.4, 131.5, 130.7, 130.7, 129.3, 127.1, 126.0, 125.7, 124.0, 15.1; HRMS ( $m/z$ )  $[\text{M}+\text{Na}]^+$  calculated for  $\text{C}_{16}\text{H}_{12}\text{OS}_2\text{Na}$  : 307.0227; found: 307.0220.

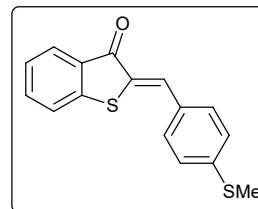

**(Z)-2-(4-Ethoxybenzylidene)benzo[*b*]thiophen-3(2H)-one (2d):** 89% yield (126 mg); bright yellow solid; mp 126-128 °C;  $R_f$  = 0.45 (15% ethyl acetate in hexanes); FTIR (KBr) 3026, 2980, 1674, 1592, 1262, 735  $\text{cm}^{-1}$ ;  $^1\text{H}$  NMR ( $\text{CDCl}_3$ , 400 MHz)  $\delta$  7.93 (s, 2H), 7.66 (d,  $J$  = 8.4 Hz, 2H), 7.56 (t,  $J$  = 7.6 Hz, 1H), 7.50 (d,  $J$  = 8.0 Hz, 1H), 7.32-7.25 (m, 1H), 6.98 (d,  $J$  = 8.4 Hz, 2H), 4.10 (q,  $J$  = 6.8 Hz, 2H), 1.44 (t,  $J$  = 7.2 Hz, 3H);  $^{13}\text{C}$  NMR ( $\text{CDCl}_3$ , 100 MHz)  $\delta$  188.7, 160.9, 146.1, 135.1, 134.0, 133.2, 130.9, 127.8, 127.1, 127.0, 125.6, 124.0, 115.2, 63.9, 14.8; HRMS ( $m/z$ )  $[\text{M}+\text{Na}]^+$  calculated for  $\text{C}_{17}\text{H}_{14}\text{O}_2\text{SNa}$  : 305.0611; found: 305.0612.

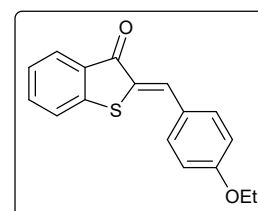

**(Z)-2-(4-Methoxybenzylidene)benzo[*b*]thiophen-3(2H)-one (2e):**<sup>4</sup> 87% yield (117 mg); bright yellow solid; mp 153-54 °C;  $R_f$  = 0.42 (10% ethyl acetate in hexanes); FTIR (KBr) 3066, 2903, 1679, 1591, 1263, 733  $\text{cm}^{-1}$ ;  $^1\text{H}$  NMR ( $\text{CDCl}_3$ , 400 MHz)  $\delta$  7.99-7.88 (m, 2H), 7.67 (d,  $J$  = 8.4 Hz, 2H), 7.56 (t,  $J$  = 7.2 Hz, 1H), 7.50 (d,  $J$  = 7.6 Hz, 1H), 7.32-7.25 (m, 1H), 7.00 (d,  $J$  = 8.4 Hz, 2H), 3.87 (s, 3H);  $^{13}\text{C}$  NMR ( $\text{CDCl}_3$ , 100 MHz)  $\delta$  188.8, 161.4, 146.1, 135.1, 133.9, 133.2, 130.9, 127.9, 127.1, 127.1, 125.6, 124.0, 114.8, 55.6; HRMS ( $m/z$ )  $[\text{M}+\text{Na}]^+$  calculated for  $\text{C}_{16}\text{H}_{12}\text{O}_2\text{SNa}$  : 291.0456; found: 291.0451.

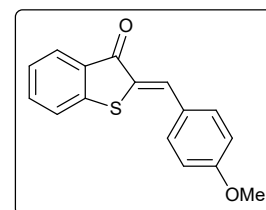

**(Z)-2-(4-Isopropylbenzylidene)benzo[*b*]thiophen-3(2H)-one (2f):** 56% yield (78 mg); bright yellow solid; mp 54-56 °C;  $R_f$  = 0.55 (5% ethyl acetate in hexanes); FTIR (KBr) 3025, 2961, 1678, 1593, 1282, 740  $\text{cm}^{-1}$ ;  $^1\text{H}$  NMR ( $\text{CDCl}_3$ , 400 MHz)  $\delta$  7.98-7.93 (m, 2H), 7.66 (d,  $J$  = 8.0 Hz, 2H), 7.58 (t,  $J$  = 7.2 Hz, 1H), 7.51 (d,  $J$  = 7.6 Hz, 1H), 7.35 (d,  $J$  = 8.4 Hz, 2H), 7.30 (t,  $J$  = 7.6 Hz, 1H), 2.97 (hep,  $J$  = 6.8 Hz, 1H), 1.29 (d,  $J$  = 7.2 Hz, 6H);  $^{13}\text{C}$  NMR ( $\text{CDCl}_3$ , 100 MHz)  $\delta$  188.9, 151.9, 146.3, 135.3, 134.0, 132.1, 131.4, 130.8, 129.5, 127.4, 127.2, 125.7, 124.1, 34.4, 23.9; HRMS ( $m/z$ )  $[\text{M}+\text{Na}]^+$  calculated for  $\text{C}_{18}\text{H}_{16}\text{OSNa}$  : 303.0820; found: 303.014.

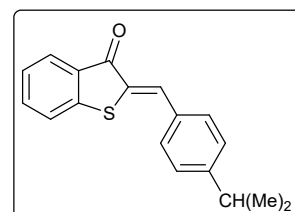

**(Z)-2-(2-Methoxybenzylidene)benzo[b]thiophen-3(2H)-one (2g):**<sup>4</sup> 72% yield (97 mg); bright yellow solid; mp 153-54 °C;  $R_f = 0.52$  (20% ethyl acetate in hexanes); FTIR (KBr) 3031, 2927, 1680, 1589, 1254, 733  $\text{cm}^{-1}$ ;  $^1\text{H NMR}$  ( $\text{CDCl}_3$ , 400 MHz)  $\delta$  8.43 (s, 1H), 7.95 (d,  $J = 7.6$  Hz, 1H), 7.77 (d,  $J = 7.6$  Hz, 1H), 7.56 (t,  $J = 7.2$  Hz, 2H), 7.49 (d,  $J = 7.6$  Hz, 1H), 7.40 (t,  $J = 8.0$  Hz, 1H), 7.07 (t,  $J = 7.2$  Hz, 1H), 6.95 (d,  $J = 8.4$  Hz, 1H), 3.92 (s, 3H);  $^{13}\text{C NMR}$  ( $\text{CDCl}_3$ , 100 MHz)  $\delta$  188.7, 159.3, 146.4, 135.2, 132.0, 130.9, 130.3, 130.0, 128.7, 127.1, 125.6, 124.0, 123.7, 120.9, 111.1, 55.7; HRMS ( $m/z$ )  $[\text{M}+\text{Na}]^+$  calculated for  $\text{C}_{16}\text{H}_{12}\text{O}_2\text{SNa}$  : 291.0456; found: 291.0457.

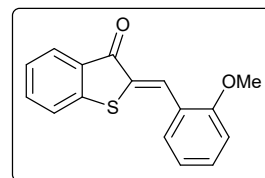

**(Z)-2-(2-Ethoxybenzylidene)benzo[b]thiophen-3(2H)-one (2h):** 71% yield (101 mg); bright yellow solid; mp 92-94 °C;  $R_f = 0.52$  (10% ethyl acetate in hexanes); FTIR (KBr) 3021, 2990, 1680, 1588, 1248, 736  $\text{cm}^{-1}$ ;  $^1\text{H NMR}$  ( $\text{CDCl}_3$ , 400 MHz)  $\delta$  8.46 (s, 1H), 7.94 (d,  $J = 7.6$  Hz, 1H), 7.77 (d,  $J = 7.6$  Hz, 1H), 7.56 (t,  $J = 7.6$  Hz, 1H), 7.49 (d,  $J = 7.6$  Hz, 1H), 7.37 (t,  $J = 7.6$  Hz, 1H), 7.32-7.25 (m, 1H), 7.05 (t,  $J = 7.2$  Hz, 1H), 6.93 (d,  $J = 8.4$  Hz, 1H) 4.13 (q,  $J = 6.8$  Hz, 2H), 1.50 (t,  $J = 6.8$  Hz, 3H);  $^{13}\text{C NMR}$  ( $\text{CDCl}_3$ , 100 MHz)  $\delta$  188.8, 158.8, 146.4, 135.1, 131.9, 131.0, 130.2, 130.0, 129.0, 127.1, 125.5, 124.0, 123.8, 120.7, 112.0, 64.3, 14.9; HRMS ( $m/z$ )  $[\text{M}+\text{Na}]^+$  calculated for  $\text{C}_{17}\text{H}_{14}\text{O}_2\text{SNa}$  : 305.0612; found: 305.0603.

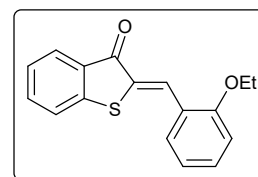

**(Z)-2-(2-Methylbenzylidene)benzo[b]thiophen-3(2H)-one (2i):**<sup>5</sup> 94% yield (119mg); bright yellow solid; mp 120-122 °C;  $R_f = 0.50$  (5% ethyl acetate in hexanes); FTIR (KBr) 3030, 2951, 1674, 1587, 1282, 734  $\text{cm}^{-1}$ ;  $^1\text{H NMR}$  ( $\text{CDCl}_3$ , 400 MHz)  $\delta$  8.20 (s, 1H), 7.95 (d,  $J = 7.6$  Hz, 1H), 7.79-7.74 (m, 1H), 7.57 (t,  $J = 7.6$  Hz, 1H), 7.48 (d,  $J = 8.0$  Hz, 1H), 7.34-7.25 (m, 4H), 2.50 (s, 3H);  $^{13}\text{C NMR}$  ( $\text{CDCl}_3$ , 100 MHz)  $\delta$  188.6, 146.7, 139.8, 135.4, 133.4, 131.6, 131.4, 131.0, 130.9, 130.2, 128.9, 127.9, 126.5, 125.7, 124.1, 20.3; HRMS ( $m/z$ )  $[\text{M}+\text{Na}]^+$  calculated for  $\text{C}_{16}\text{H}_{12}\text{OSNa}$  : 275.0506; found: 275.0498.

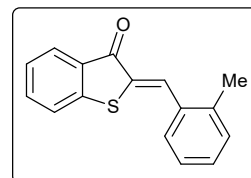

**(Z)-2-(2,4-Dimethoxybenzylidene)benzo[b]thiophen-3(2H)-one (2j):**<sup>6</sup> 83% yield (124 mg); bright yellow solid; mp 168-170 °C;  $R_f = 0.39$  (20% ethyl acetate in hexanes); FTIR (KBr) 3001, 2834, 1678, 1597, 1265, 752  $\text{cm}^{-1}$ ;  $^1\text{H NMR}$  ( $\text{CDCl}_3$ , 400 MHz)  $\delta$  8.40 (s, 1H), 7.94 (d,  $J = 7.6$  Hz, 1H), 7.73 (d,  $J = 8.8$  Hz, 1H), 7.54 (t,  $J = 7.6$  Hz, 1H), 7.49 (d,  $J = 7.6$  Hz, 1H), 7.30-7.25 (m, 1H), 6.61 (d,  $J = 8.4$  Hz, 1H), 6.48 (s, 1H), 3.90 (s, 3H), 3.87 (s, 3H);  $^{13}\text{C NMR}$  ( $\text{CDCl}_3$ , 100 MHz)  $\delta$  188.6, 163.3, 161.0, 146.2, 134.8, 131.5, 131.3, 128.8, 127.8, 127.0, 125.4, 123.9, 116.9, 105.5, 98.5, 55.8, 55.7; ; HRMS ( $m/z$ )  $[\text{M}+\text{Na}]^+$  calculated for  $\text{C}_{17}\text{H}_{14}\text{O}_3\text{SNa}$  : 321.0561; found: 321.0553.

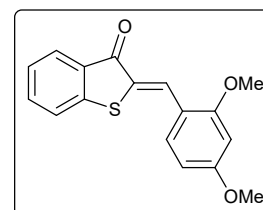

**(Z)-2-(3,4-Dimethoxybenzylidene)benzo[b]thiophen-3(2H)-one (2k):**<sup>7</sup> 91% yield (135 mg); bright yellow solid; mp 155-157 °C;  $R_f = 0.50$  (30% ethyl acetate in hexanes); FTIR (KBr) 3006, 2963, 1658, 1593, 1271, 745  $\text{cm}^{-1}$ ;  $^1\text{H NMR}$  ( $\text{CDCl}_3$ , 400

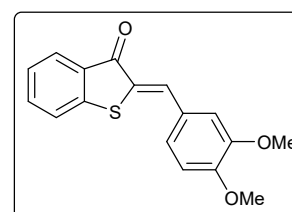



MHz)  $\delta$  7.96-7.90 (m, 2H), 7.56 (t,  $J$  = 7.2 Hz, 1H), 7.50 (d,  $J$  = 8.0 Hz, 1H), 7.34-7.23 (m, 3H), 6.96 (d,  $J$  = 8.4 Hz, 1H), 3.97 (s, 3H), 3.94 (s, 3H);  $^{13}\text{C}$  NMR ( $\text{CDCl}_3$ , 100 MHz)  $\delta$  188.6, 151.2, 149.4, 146.0, 135.1, 134.1, 130.9, 128.1, 127.4, 127.1, 125.8, 125.7, 124.0, 113.2, 111.5, 56.2, 56.1; HRMS ( $m/z$ )  $[\text{M}+\text{Na}]^+$  calculated for  $\text{C}_{17}\text{H}_{14}\text{O}_3\text{SNa}$  : 321.0561; found: 321.0558.

**(Z)-2-(3-Methoxybenzylidene)benzo[*b*]thiophen-3(2H)-one (2l):** 81% yield (109 mg); bright yellow solid; mp 83-85 °C;  $R_f$  = 0.44 (10% ethyl acetate in hexanes); FTIR (KBr)

3064, 2960, 1676, 1592, 1273, 738  $\text{cm}^{-1}$ ;  $^1\text{H}$  NMR ( $\text{CDCl}_3$ , 400 MHz)  $\delta$  7.96-7.91 (m, 2H), 7.58 (t,  $J$  = 7.2 Hz, 1H), 7.50 (d,  $J$  = 8.0 Hz, 1H), 7.39 (t,  $J$  = 7.6 Hz, 1H), 7.33-7.27 (m, 2H), 7.24 (s, 1H), 6.98 (d,  $J$  = 8.0 Hz,

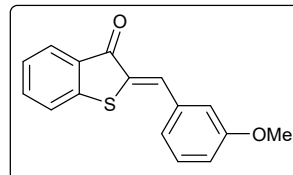

1H), 3.88 (s, 3H);  $^{13}\text{C}$  NMR ( $\text{CDCl}_3$ , 100 MHz)  $\delta$  188.8, 160.1, 146.2, 135.7, 135.5, 133.7, 130.7, 130.6, 130.2, 127.2, 125.8, 124.0, 123.9, 116.5, 115.6, 55.5; HRMS ( $m/z$ )  $[\text{M}+\text{Na}]^+$  calculated for  $\text{C}_{16}\text{H}_{12}\text{O}_2\text{SNa}$  : 291.0456; found: 291.0456.

**(Z)-2-(4-Bromobenzylidene)benzo[*b*]thiophen-3(2H)-one (2m):**<sup>4</sup> 95% yield (132 mg); bright yellow solid; mp 168-169 °C;  $R_f$  = 0.42 (10% ethyl acetate in hexanes); FTIR (KBr) 3001, 2956, 1684, 1594,

1282, 732  $\text{cm}^{-1}$ ;  $^1\text{H}$  NMR ( $\text{CDCl}_3$ , 400 MHz)  $\delta$  7.94 (d,  $J$  = 7.6 Hz, 1H), 7.87 (s, 1H), 7.64-7.53 (m, 5H), 7.50 (d,  $J$  = 8.0 Hz, 1H), 7.31 (t,  $J$  = 7.2 Hz, 1H);  $^{13}\text{C}$  NMR ( $\text{CDCl}_3$ , 100 MHz)  $\delta$  188.7, 145.9, 135.6, 133.4, 132.5, 132.4, 132.2,

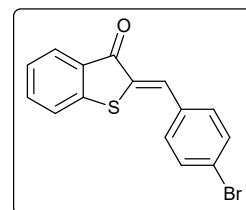

131.1, 130.4, 127.3, 126.0, 124.7, 124.1; HRMS ( $m/z$ )  $[\text{M}+\text{Na}]^+$  calculated for  $\text{C}_{15}\text{H}_9\text{BrOSNa}$  : 338.9455; found: 338.9440.

**(Z)-2-(4-Chlorobenzylidene)benzo[*b*]thiophen-3(2H)-one (2n):**<sup>4</sup> 88% yield (120 mg); bright yellow solid; mp 178-180 °C;  $R_f$  = 0.39 (5% ethyl acetate in hexanes); FTIR (KBr)

3065, 2932, 1684, 1579, 1282, 737  $\text{cm}^{-1}$ ;  $^1\text{H}$  NMR ( $\text{CDCl}_3$ , 400 MHz)  $\delta$  7.92 (d,  $J$  = 8.0 Hz, 1H), 7.87 (s, 1H), 7.63-7.55 (m, 3H), 7.48 (d,  $J$  = 7.6 Hz, 1H), 7.43 (t,  $J$  = 8.4 Hz, 2H), 7.29 (t,  $J$  = 7.2 Hz, 1H);  $^{13}\text{C}$  NMR ( $\text{CDCl}_3$ , 100 MHz)

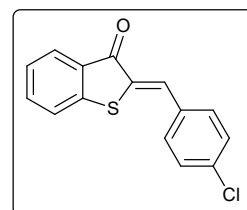

$\delta$  188.6, 145.9, 136.3, 135.6, 132.9, 132.2, 132.1, 130.9, 130.4, 129.5, 127.3, 125.9, 124.1; HRMS ( $m/z$ )  $[\text{M}+\text{Na}]^+$  calculated for  $\text{C}_{15}\text{H}_9\text{ClOSNa}$  : 273.0141; found: 273.0148.

**(Z)-2-(4-Fluorobenzylidene)benzo[*b*]thiophen-3(2H)-one (2o):**<sup>4</sup> 63% yield (80 mg); bright yellow solid; mp 166-168 °C;  $R_f$  = 0.52 (10% ethyl acetate in hexanes); FTIR (KBr) 3044, 1682, 1592, 1281,

737  $\text{cm}^{-1}$ ;  $^1\text{H}$  NMR ( $\text{CDCl}_3$ , 400 MHz)  $\delta$  8.00-7.87 (m, 2H), 7.75-7.64 (m, 2H), 7.57 (t,  $J$  = 7.6 Hz, 1H), 7.49 (d,  $J$  = 8.0 Hz, 1H), 7.30 (t,  $J$  = 7.6 Hz, 1H), 7.16 (t,  $J$  = 8.4 Hz, 2H);  $^{13}\text{C}$  NMR ( $\text{CDCl}_3$ , 100 MHz)  $\delta$  188.7, 163.6 (2C) (d,  $J$  = 251 Hz), 146.0, 135.5, 133.1(2C) (d,  $J$  = 8.0 Hz), 132.4, 130.7 (2C) (d,  $J$  = 3.0 Hz),

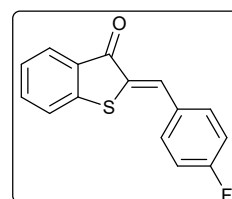

130.5, 130.0, 127.2, 125.9, 124.1, 116.5 (2C) (d,  $J$  = 22 Hz); HRMS ( $m/z$ )  $[\text{M}+\text{Na}]^+$  calculated for  $\text{C}_{15}\text{H}_9\text{OFNa}$  : 279.0256; found: 279.0261.

**(Z)-2-(2-Chlorobenzylidene)benzo[b]thiophen-3(2H)-one (2p):**<sup>4</sup> 84% yield (114 mg); bright yellow solid; mp 147-149 °C;  $R_f$  = 0.56 (10% ethyl acetate in hexanes); FTIR (KBr) 3063, 2921, 1680, 1588, 1281, 735  $\text{cm}^{-1}$ ;  $^1\text{H}$  NMR ( $\text{CDCl}_3$ , 400 MHz)  $\delta$  8.32 (s, 1H), 7.95 (d,  $J$  = 8.0 Hz, 1H), 7.83 (d,  $J$  = 7.6 Hz, 1H), 7.58 (t,  $J$  = 7.6 Hz, 1H), 7.48 (d,  $J$  = 7.2 Hz, 2H), 7.41-7.28 (m, 3H);  $^{13}\text{C}$  NMR ( $\text{CDCl}_3$ , 100 MHz)  $\delta$  188.4, 146.1, 136.7, 135.6, 133.0, 132.8, 131.0, 130.5, 130.5, 130.2, 129.4, 127.4, 127.2, 125.9, 124.1; HRMS (m/z)  $[\text{M}+\text{Na}]^+$  calculated for  $\text{C}_{15}\text{H}_9\text{ClOSNa}$  : 294.9960; found: 294.9950.

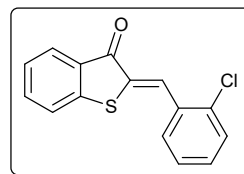

**(Z)-2-(2-Bromobenzylidene)benzo[b]thiophen-3(2H)-one (2q):** 61% yield (100 mg); bright yellow solid; mp 148-150 °C;  $R_f$  = 0.55 (10% ethyl acetate in hexanes); FTIR (KBr) 3060, 2922, 1678, 1591, 1278, 737  $\text{cm}^{-1}$ ;  $^1\text{H}$  NMR ( $\text{CDCl}_3$ , 400 MHz)  $\delta$  8.25 (s, 1H), 7.94 (d,  $J$  = 7.6 Hz, 1H), 7.80 (d,  $J$  = 8.0 Hz, 1H), 7.68 (d,  $J$  = 8.0 Hz, 1H), 7.57 (t,  $J$  = 7.6 Hz, 1H), 7.47 (d,  $J$  = 7.6 Hz, 1H), 7.42 (t,  $J$  = 7.6 Hz, 1H), 7.30 (t,  $J$  = 7.2 Hz, 1H), 7.27-7.22 (m, 1H);  $^{13}\text{C}$  NMR ( $\text{CDCl}_3$ , 100 MHz)  $\delta$  188.3, 146.2, 135.6, 134.6, 133.8, 133.1, 132.1, 131.1, 130.6, 130.3, 127.8, 127.4, 127.1, 125.9, 124.1; HRMS (m/z)  $[\text{M}+\text{Na}]^+$  calculated for  $\text{C}_{15}\text{H}_9\text{BrOSNa}$  : 338.9455; found: 338.9453.

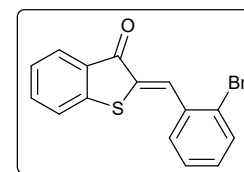

**(Z)-2-(3-Bromobenzylidene)benzo[b]thiophen-3(2H)-one (2r):**<sup>4</sup> 65% yield (106 mg); bright yellow solid; mp 154-156 °C;  $R_f$  = 0.42 (5% ethyl acetate in hexanes); FTIR (KBr) 3054, 2921, 1682, 1585, 1281, 738  $\text{cm}^{-1}$ ;  $^1\text{H}$  NMR ( $\text{CDCl}_3$ , 400 MHz)  $\delta$  7.93 (d,  $J$  = 7.6 Hz, 1H), 7.87-7.80 (m, 2H), 7.63-7.56 (m, 2H), 7.55-7.47 (m, 2H), 7.34 (t,  $J$  = 8.4 Hz, 1H), 7.30 (d,  $J$  = 7.6 Hz, 1H);  $^{13}\text{C}$  NMR ( $\text{CDCl}_3$ , 100 MHz)  $\delta$  188.6, 146.0, 136.5, 135.7, 133.5, 133.0, 131.8, 131.6, 130.6, 130.3, 129.5, 127.3, 126.0, 124.1, 123.3; HRMS (m/z)  $[\text{M}+\text{Na}]^+$  calculated for  $\text{C}_{15}\text{H}_9\text{BrOSNa}$  : 338.9455; found: 338.9441.

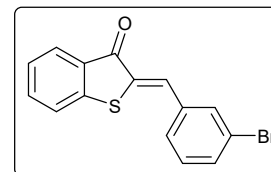

**(Z)-2-(3-Chlorobenzylidene)benzo[b]thiophen-3(2H)-one (2s):**<sup>5</sup> 54% yield (73 mg); bright yellow solid; mp 161-163 °C;  $R_f$  = 0.55 (10% ethyl acetate in hexanes); FTIR (KBr) 3057, 3000, 1683, 1587, 1281, 738  $\text{cm}^{-1}$ ;  $^1\text{H}$  NMR ( $\text{CDCl}_3$ , 400 MHz)  $\delta$  7.92 (d,  $J$  = 7.6 Hz, 1H), 7.84 (s, 1H), 7.66 (s, 1H), 7.61-7.54 (m, 2H), 7.49 (d,  $J$  = 7.6 Hz, 1H), 7.43-7.34 (m, 2H), 7.30 (t,  $J$  = 7.2 Hz, 1H);  $^{13}\text{C}$  NMR ( $\text{CDCl}_3$ , 100 MHz)  $\delta$  188.6, 145.9, 136.2, 135.7, 135.2, 131.7, 130.6, 130.3, 130.3, 130.0, 129.1, 127.3, 127.3, 126.0, 124.1; HRMS (m/z)  $[\text{M}+\text{Na}]^+$  calculated for  $\text{C}_{15}\text{H}_9\text{ClOSNa}$  : 294.9960; found: 294.9952.

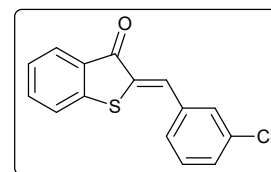

**(Z)-2-(3-Fluorobenzylidene)benzo[b]thiophen-3(2H)-one (2t):** 60% yield (76 mg); bright yellow solid; mp 119-121 °C;  $R_f$  = 0.47 (10% ethyl acetate in hexanes); FTIR (KBr) 3078, 2924, 1679, 1580, 1273, 735  $\text{cm}^{-1}$ ;  $^1\text{H}$  NMR ( $\text{CDCl}_3$ , 400 MHz)  $\delta$  7.93 (d,  $J$  = 7.6 Hz, 1H), 7.88 (s, 1H), 7.58 (t,  $J$  = 7.2 Hz, 1H), 7.53-7.36 (m, 4H), 7.30 (t,  $J$  = 7.2 Hz, 1H), 7.11 (t,  $J$  = 7.2 Hz, 1H);  $^{13}\text{C}$  NMR ( $\text{CDCl}_3$ , 100 MHz)  $\delta$  188.7, 163.1 (2C) (d,  $J$  = 245 Hz), 146.0, 136.6 (2C) (d,  $J$  = 8.0 Hz), 135.7, 132.0, 131.7, 130.7 (2C)

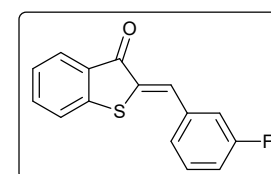

(d,  $J = 8.0$  Hz), 130.3, 127.3, 127.0 (2C) (d,  $J = 8.0$  Hz), 126.0, 124.1, 117.2 (2C) (d,  $J = 7.0$  Hz), 117.0 (2C) (d,  $J = 6.0$  Hz); HRMS ( $m/z$ )  $[M+Na]^+$  calculated for  $C_{15}H_9OFSNa$  : 279.0256; found: 279.0252.

**(Z)-2-([1,1-Biphenyl]-4-ylmethylene)benzo[*b*]thiophen-3(2H)-one (2u):** 85% yield (134 mg); bright yellow solid; mp 155-157 °C;  $R_f = 0.44$  (5% ethyl acetate in hexanes); FTIR

(KBr) 3028, 2954, 1673, 1587, 1286, 729  $cm^{-1}$ ;  $^1H$  NMR ( $CDCl_3$ , 400 MHz)  $\delta$  8.00 (s, 1H), 7.96 (d,  $J = 7.6$  Hz, 1H), 7.79 (d,  $J = 8.0$  Hz, 2H), 7.72 (d,  $J = 7.6$  Hz, 2H), 7.65 (d,  $J = 7.6$  Hz, 2H), 7.59 (t,  $J = 7.2$  Hz, 1H), 7.55-7.44 (m, 3H), 7.40 (t,  $J = 6.8$  Hz, 1H), 7.31 (t,  $J = 7.2$  Hz, 1H);  $^{13}C$  NMR ( $CDCl_3$ , 100 MHz)

$\delta$  188.8, 146.1, 142.9, 140.1, 135.4, 133.4, 133.3, 131.7, 130.6, 130.3, 129.1, 128.2, 127.8, 127.3, 127.2, 125.8, 124.1; HRMS ( $m/z$ )  $[M+Na]^+$  calculated for  $C_{21}H_{14}OSNa$  : 337.0663; found: 337.0666.

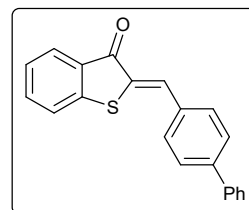

**(Z)-2-(Anthracen-9-methylene)benzo[*b*]thiophen-3(2H)-one (2v):**<sup>4</sup> 83% yield (141 mg); bright yellow solid; mp 156-158 °C;  $R_f = 0.52$  (15% ethyl acetate in hexanes); FTIR

(KBr) 3001, 1670, 1558, 1265, 752  $cm^{-1}$ ;  $^1H$  NMR ( $CDCl_3$ , 400 MHz)  $\delta$  8.87 (s, 1H), 8.53 (s, 1H), 8.12-8.04 (m, 4H), 8.00 (d,  $J = 7.6$  Hz, 1H) 7.56-7.50 (m, 5H), 7.30 (t,  $J = 7.6$  Hz, 2H);  $^{13}C$  NMR ( $CDCl_3$ , 100 MHz)  $\delta$  187.8, 146.8,

139.0, 135.7, 131.8, 131.4, 131.4, 129.1, 129.0, 128.9, 127.4, 126.6, 125.8, 125.7, 125.6, 124.1; HRMS ( $m/z$ )  $[M+Na]^+$  calculated for  $C_{23}H_{14}OSNa$  : 361.0663; found: 361.0669.

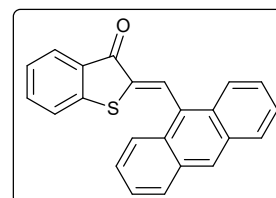

**(Z)-2-(Naphthalen-2-ylmethylene)benzo[*b*]thiophen-3(2H)-one (2w):**<sup>4</sup> 90% yield (130 mg); bright yellow solid; mp 106-108 °C;  $R_f = 0.38$  (10% ethyl acetate in hexanes); FTIR

(KBr) 3060, 2957, 1676, 1586, 1269, 734  $cm^{-1}$ ;  $^1H$  NMR ( $CDCl_3$ , 400 MHz)  $\delta$  8.20 (s, 1H), 8.12 (s, 1H), 8.01-7.88 (m, 3H), 7.85 (d,  $J = 6.4$  Hz, 1H), 7.80 (d,  $J = 8.4$  Hz, 1H), 7.62-7.51 (m, 4H), 7.31 (t,  $J = 7.2$  Hz, 1H);  $^{13}C$  NMR

( $CDCl_3$ , 100 MHz)  $\delta$  188.8, 146.2, 135.4, 133.9, 133.9, 133.4, 132.1, 132.0, 130.7, 130.6, 129.0, 128.9, 128.9, 127.9, 127.9, 127.2, 127.0, 125.8, 124.1; HRMS ( $m/z$ )  $[M+Na]^+$  calculated for  $C_{19}H_{12}ONaSn$  : 311.0507; found: 311.0500.

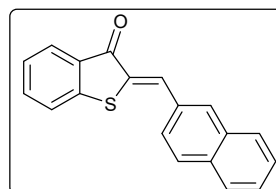

**(Z)-2-(2,3,4-Trimethoxybenzylidene)benzo[*b*]thiophen-3(2H)-one (2x):** 51% yield (84 mg); bright yellow solid; mp 132-134 °C;  $R_f = 0.58$  (30% ethyl acetate in hexanes);

FTIR (KBr) 3002, 2940, 1673, 1586, 1282, 741  $cm^{-1}$ ;  $^1H$  NMR ( $CDCl_3$ , 400 MHz)  $\delta$  8.28 (s, 1H), 7.93 (d,  $J = 8.0$  Hz, 1H), 7.56-7.46 (m, 3H), 7.31-7.25 (m, 1H), 6.79 (d,  $J = 8.4$  Hz, 1H), 3.97 (s, 3H), 3.93 (s, 3H), 3.89 (s, 3H);

$^{13}C$  NMR ( $CDCl_3$ , 100 MHz)  $\delta$  188.6, 156.0, 154.6, 146.1, 142.5, 135.0, 131.0, 129.0, 128.6, 127.1, 125.5, 125.4, 123.9, 121.8, 107.6, 62.1, 61.1, 56.2; HRMS ( $m/z$ )  $[M+Na]^+$  calculated for  $C_{18}H_{16}O_4Sn$  : 351.0667; found: 351.0674.

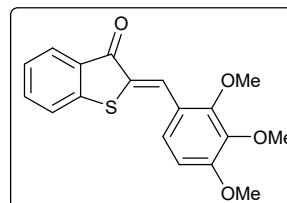

**(Z)-2-(3,4,5-Trimethoxybenzylidene)benzo[b]thiophen-3(2H)-one (2y):** 90% yield (148 mg); bright yellow solid; mp 142-144 °C;  $R_f = 0.53$  (30% ethyl acetate in hexanes); FTIR (KBr) 3055, 2998, 1669, 1582, 1282, 778  $\text{cm}^{-1}$ ;  $^1\text{H NMR}$  ( $\text{CDCl}_3$ , 400 MHz)  $\delta$  7.94 (d,  $J = 8.0$  Hz, 1H), 7.88 (s, 1H), 7.61-7.55 (m, 1H), 7.51 (d,  $J = 7.6$  Hz, 1H), 7.31 (t,  $J = 7.6$  Hz, 1H), 6.96 (s, 2H), 3.95 (s, 6H), 3.92 (s, 3H);  $^{13}\text{C NMR}$  ( $\text{CDCl}_3$ , 100 MHz)  $\delta$  188.6, 153.6, 146.0, 140.2, 135.4, 134.0, 130.7, 129.9, 129.5, 127.2, 125.8, 124.0, 108.4, 61.2, 56.3; HRMS (m/z)  $[\text{M}+\text{Na}]^+$  calculated for  $\text{C}_{18}\text{H}_{16}\text{O}_4\text{SNa}$  : 351.0667; found: 351.0658.

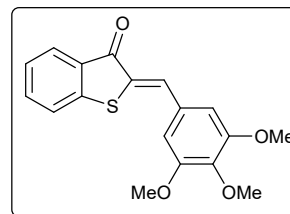

**(Z)-2-(2,4,5-Trimethoxybenzylidene)benzo[b]thiophen-3(2H)-one (2z):** 58% yield (96 mg); Orange solid; mp 154-156 °C;  $R_f = 0.39$  (30% ethyl acetate in hexanes); FTIR (KBr) 3061, 2915, 1660, 1584.2, 1214, 721  $\text{cm}^{-1}$ ;  $^1\text{H NMR}$  ( $\text{CDCl}_3$ , 400 MHz)  $\delta$  8.41 (s, 1H), 7.94 (d,  $J = 8.0$  Hz, 1H), 7.55 (t,  $J = 7.2$  Hz, 1H), 7.49 (d,  $J = 8.0$  Hz, 1H), 7.33 (s, 1H), 7.28 (t,  $J = 7.2$  Hz, 1H), 6.52 (s, 1H), 3.95 (s, 6H), 3.91 (s, 3H);  $^{13}\text{C NMR}$  ( $\text{CDCl}_3$ , 100 MHz)  $\delta$  188.4, 155.6, 152.6, 145.8, 143.3, 134.8, 131.2, 128.8, 127.3, 127.0, 125.4, 123.8, 115.2, 112.4, 96.6, 56.6, 56.5, 56.2; HRMS (m/z)  $[\text{M}+\text{Na}]^+$  calculated for  $\text{C}_{18}\text{H}_{16}\text{O}_4\text{SNa}$  : 351.0667; found: 351.0672.

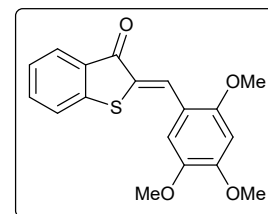

**(Z)-5-Bromo-2-(4-methylbenzylidene)benzo[b]thiophen-3(2H)-one (2aa):**<sup>8</sup> 70% yield (116 mg); bright yellow solid; mp 210-212 °C;  $R_f = 0.39$  (5% ethyl acetate in hexanes); FTIR (KBr) 3079, 2999, 1675, 1584, 1249, 727  $\text{cm}^{-1}$ ;  $^1\text{H NMR}$  ( $\text{CDCl}_3$ , 400 MHz)  $\delta$  8.03 (s, 1H), 7.94 (s, 1H), 7.65 (d,  $J = 8.0$  Hz, 1H), 7.58 (d,  $J = 8.0$  Hz, 2H), 7.37 (d,  $J = 8.4$  Hz, 1H), 7.31-7.25 (m, 2H), 2.41 (s, 3H);  $^{13}\text{C NMR}$  ( $\text{CDCl}_3$ , 100 MHz)  $\delta$  187.5, 144.9, 141.5, 137.9, 135.0, 132.4, 131.4, 131.3, 130.1, 129.9, 129.1, 125.3, 119.3, 21.8; HRMS (m/z)  $[\text{M}+\text{Na}]^+$  calculated for  $\text{C}_{16}\text{H}_{11}\text{BrOSNa}$  : 352.9612; found: 352.9614.

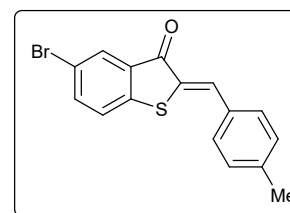

**(Z)-2-Benzylidene-5-bromobenzo[b]thiophen-3(2H)-one (2ab):**<sup>8</sup> 65% yield (103 mg); bright yellow solid; mp 156-160 °C;  $R_f = 0.52$  (5% ethyl acetate in hexanes); FTIR (KBr) 3032, 2963, 1673, 1583, 1250, 747  $\text{cm}^{-1}$ ;  $^1\text{H NMR}$  ( $\text{CDCl}_3$ , 400 MHz)  $\delta$  8.04 (s, 1H), 7.96 (s, 1H), 7.70-7.64 (m, 3H), 7.52-7.42 (m, 3H), 7.38 (d,  $J = 8.4$  Hz, 1H);  $^{13}\text{C NMR}$  ( $\text{CDCl}_3$ , 100 MHz)  $\delta$  187.5, 145.0, 138.0, 134.7, 134.1, 132.3, 131.2, 130.7, 130.1, 129.9, 129.3, 125.4, 119.6; HRMS (m/z)  $[\text{M}+\text{Na}]^+$  calculated for  $\text{C}_{15}\text{H}_9\text{BrOSNa}$  : 338.9455; found: 338.9442.

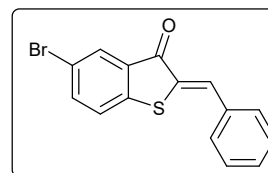

**(Z)-2-Benzylidene-5-phenylbenzo[b]thiophen-3(2H)-one (2ac):** 83% yield (130 mg); bright yellow solid; mp 136-138 °C;  $R_f = 0.45$  (5% ethyl acetate in hexanes); FTIR (KBr) 3028, 2960, 1681, 1592, 1254, 762  $\text{cm}^{-1}$ ;  $^1\text{H NMR}$  ( $\text{CDCl}_3$ , 400 MHz)  $\delta$  8.17 (s, 1H), 8.00 (s, 1H), 7.83 (d,  $J = 8.0$  Hz, 1H), 7.73

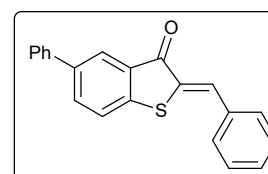

(d,  $J = 7.2$  Hz, 2H), 7.63 (d,  $J = 7.2$  Hz, 2H), 7.57 (d,  $J = 8.0$  Hz, 1H), 7.53-7.42 (m, 5H), 7.39 (t,  $J = 7.2$  Hz, 1H);  $^{13}\text{C}$  NMR ( $\text{CDCl}_3$ , 100 MHz)  $\delta$  188.8, 145.1, 139.5, 139.2, 134.4, 134.3, 134.0, 131.2, 131.2, 130.8, 130.4, 129.2, 129.1, 128.0, 127.1, 125.4, 124.3; HRMS ( $m/z$ )  $[\text{M}+\text{Na}]^+$  calculated for  $\text{C}_{21}\text{H}_{14}\text{OSNa}$  : 337.0663; found:337.0652.

**(Z)-2-Benzylidene-5-(phenylethynyl)benzo[b]thiophen-3(2H)-one (2ad):** 74% yield (118 mg);

bright yellow solid; mp 132-134 °C;  $R_f = 0.59$  (10% ethyl acetate in hexanes); FTIR (KBr) 3020, 2923, 1679, 1593, 1250, 758  $\text{cm}^{-1}$ ;  $^1\text{H}$  NMR ( $\text{CDCl}_3$ , 400 MHz)  $\delta$  8.08 (s, 1H), 7.98 (s, 1H), 7.70 (d,  $J = 7.6$  Hz, 3H), 7.57-7.52 (m, 2H), 7.52-7.46 (m, 3H), 7.44 (d,  $J = 7.2$  Hz, 1H),

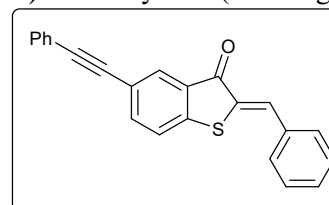

7.39-7.34 (m, 3H);  $^{13}\text{C}$  NMR ( $\text{CDCl}_3$ , 100 MHz)  $\delta$  188.1, 145.9, 138.0, 134.4, 134.2, 131.8, 131.2, 130.8, 130.5, 130.2, 130.1, 129.3, 128.7, 128.6, 124.0, 122.9, 121.2, 90.7, 88.1; HRMS ( $m/z$ )  $[\text{M}+\text{H}]^+$  calculated for  $\text{C}_{23}\text{H}_{15}\text{OS}$  : 339.0844; found:339.0822.

**(Z)-2-(Furan-2-ylmethylene)benzo[b]thiophen-3(2H)-one (2ae):**<sup>9</sup> 86% yield (98 mg); bright yellow

solid; mp 125-127 °C;  $R_f = 0.58$  (20% ethyl acetate in hexanes); FTIR (KBr) 3066, 2964, 1675, 1597, 1292, 734  $\text{cm}^{-1}$ ;  $^1\text{H}$  NMR ( $\text{CDCl}_3$ , 400 MHz)  $\delta$  7.91 (d,  $J = 8.0$  Hz, 1H), 7.75 (s, 1H), 7.72-7.66 (m, 1H), 7.57 (t,  $J = 8.0$  Hz, 1H), 7.49 (d,  $J = 8.0$  Hz, 1H), 7.29 (d,  $J = 7.6$  Hz, 1H), 6.87 (d,  $J = 3.6$  Hz, 1H), 6.66-6.55 (m, 1H);

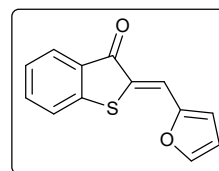

$^{13}\text{C}$  NMR ( $\text{CDCl}_3$ , 100 MHz)  $\delta$  188.4, 151.2, 146.5, 146.2, 135.2, 130.9, 128.6, 126.9, 125.5, 124.0, 119.5, 118.0, 113.4; HRMS ( $m/z$ )  $[\text{M}+\text{Na}]^+$  calculated for  $\text{C}_{13}\text{H}_8\text{O}_2\text{SNa}$  : 251.0143; found: 251.0124.

**(Z)-2-(Thiophen-2-ylmethylene)benzo[b]thiophen-3(2H)-one (2af):**<sup>4</sup> 80% yield (98 mg); bright

yellow solid; mp 169-170 °C;  $R_f = 0.51$  (15% ethyl acetate in hexanes); FTIR (KBr) 3062, 2994, 1670, 1583, 1279, 737  $\text{cm}^{-1}$ ;  $^1\text{H}$  NMR ( $\text{CDCl}_3$ , 400 MHz)  $\delta$  8.14 (s, 1H), 7.92 (d,  $J = 7.6$  Hz, 1H), 7.65 (d,  $J = 4.8$  Hz, 1H), 7.57 (t,  $J = 7.6$  Hz, 1H), 7.53-7.49 (m, 2H), 7.29 (t,  $J = 7.6$  Hz, 1H), 7.19 (t,  $J = 4.0$  Hz, 1H);

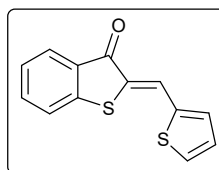

$^{13}\text{C}$  NMR ( $\text{CDCl}_3$ , 100 MHz)  $\delta$  188.4, 145.7, 139.3, 135.3, 133.8, 131.8, 131.1, 129.0, 128.8, 127.1, 126.1, 125.8, 124.2; HRMS ( $m/z$ )  $[\text{M}+\text{Na}]^+$  calculated for  $\text{C}_{13}\text{H}_8\text{OS}_2\text{Na}$  : 266.9914; found:266.9899.

**(Z)-2-((1H-Indol-2-yl)methylene)benzo[b]thiophen-3(2H)-one (2ag):** 54% yield (75 mg); dark red

solid; mp 233-235 °C;  $R_f = 0.38$  (30% ethyl acetate in hexanes); FTIR (KBr) 3057, 2925, 1617, 1587, 1282, 738  $\text{cm}^{-1}$ ;  $^1\text{H}$  NMR ( $\text{DMSO-d}_6$ , 400 MHz)  $\delta$  12.25 (s, 1H), 8.24 (s, 1H), 7.98-7.92 (m, 2H), 7.83 (d,  $J = 8.6$  Hz, 1H), 7.75 (d,  $J = 8.0$  Hz, 1H), 7.67 (t,  $J = 7.6$  Hz, 1H), 7.51 (d,  $J = 7.6$  Hz, 1H), 7.36 (t,  $J = 7.6$  Hz, 1H), 7.28-7.18 (m, 2H);  $^{13}\text{C}$  NMR ( $\text{DMSO-d}_6$ , 100 MHz)  $\delta$  186.4,

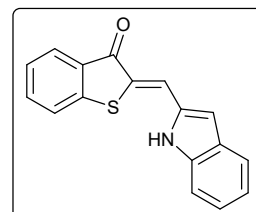

144.0, 136.5, 135.1, 131.2, 130.1, 127.2, 126.1, 125.8, 125.7, 124.4, 123.9, 123.3, 121.3, 118.5, 112.6, 111.6; HRMS ( $m/z$ )  $[\text{M}+\text{Na}]^+$  calculated for  $\text{C}_{17}\text{H}_{11}\text{NOSNa}$  : 300.0459; found: 300.0449.

**(Z)-2-((E)-3-Phenylallylidene)benzo[b]thiophen-3(2H)-one (2ah):**<sup>10</sup> 66% yield (87 mg); bright yellow solid; mp 122-124 °C;  $R_f = 0.39$  (10% ethyl acetate in hexanes); FTIR (KBr) 3061, 2921, 1668, 1593, 1284, 734  $\text{cm}^{-1}$ ;  $^1\text{H}$  NMR ( $\text{CDCl}_3$ , 400 MHz)  $\delta$  7.90 (d,  $J = 7.6$  Hz, 1H), 7.68 (d,  $J = 11.2$  Hz, 1H), 7.60-7.52 (m, 3H), 7.49 (d,  $J = 7.6$  Hz, 1H), 7.43-7.33 (m, 3H), 7.27 (d,  $J = 9.2$  Hz, 1H), 7.11 (d,  $J = 15.2$  Hz, 1H), 6.99 (dd,  $J = 11.6$  Hz, 1H);  $^{13}\text{C}$  NMR ( $\text{CDCl}_3$ , 100 MHz)  $\delta$  188.1, 145.2, 143.7, 136.1, 135.2, 133.2, 133.1, 131.8, 129.8, 129.1, 127.7, 127.0, 125.5, 124.4, 124.1; HRMS (m/z)  $[\text{M}+\text{Na}]^+$  calculated for  $\text{C}_{17}\text{H}_{12}\text{OSNa}$  : 287.0507; found: 287.0495.

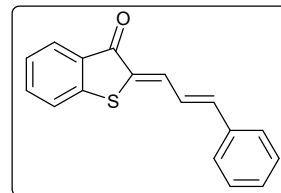

**(Z)-2-(3-Nitrobenzylidene)benzo[b]thiophen-3(2H)-one (2ai):**<sup>4, 11</sup> 69% yield (98 mg); bright yellow solid; mp 228-230 °C;  $R_f = 0.50$  (15% ethyl acetate in hexanes); FTIR (KBr) 3014, 2913, 1680, 1527, 1445, 1347, 1279, 735  $\text{cm}^{-1}$ ;  $^1\text{H}$  NMR ( $\text{CDCl}_3$ , 500 MHz)  $\delta$  8.57 (t,  $J = 2.0$  Hz, 1H), 8.26 (d,  $J = 8.0$  Hz, 1H), 8.00-7.94 (m, 3H), 7.69-7.61 (m, 2H), 7.54 (d,  $J = 8.0$  Hz, 1H), 7.34 (t,  $J = 8.0$  Hz, 1H);  $^{13}\text{C}$  NMR ( $\text{CDCl}_3$ , 125 MHz)  $\delta$  188.5, 148.9, 145.6, 136.4, 136.2, 136.1, 133.4, 130.2, 130.1, 130.1, 127.5, 126.3, 125.0, 124.3, 124.3; HRMS (m/z)  $[\text{M}+\text{Na}]^+$  calculated for  $\text{C}_{15}\text{H}_9\text{NO}_3\text{SNa}$  : 306.0201; found: 306.0192.

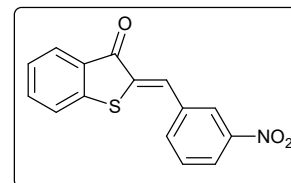

**(Z)-3-((3-Oxobenzob[thiophen-2(3H)-ylidene)methyl]benzonitrile (2aj):** 71% yield (94 mg); bright yellow solid; mp 256-258 °C;  $R_f = 0.47$  (15% ethyl acetate in hexanes); FTIR (KBr) 3067, 2920, 2222, 1676, 1592, 1282, 782  $\text{cm}^{-1}$ ;  $^1\text{H}$  NMR ( $\text{CDCl}_3$ , 500 MHz)  $\delta$  8.00-7.93 (m, 2H), 7.90 (d,  $J = 10.0$  Hz, 1H), 7.87 (s, 1H), 7.68 (d,  $J = 9.5$  Hz, 1H), 7.65-7.57 (m, 2H), 7.53 (d,  $J = 9.5$  Hz, 1H), 7.34 (t,  $J = 9.0$  Hz, 1H);  $^{13}\text{C}$  NMR ( $\text{CDCl}_3$ , 125 MHz)  $\delta$  188.5, 145.7, 136.0, 135.8, 134.8, 133.8, 133.0, 132.9, 130.1, 130.1, 127.5, 126.3, 124.2, 118.3, 113.7; HRMS (m/z)  $[\text{M}+\text{H}]^+$  calculated for  $\text{C}_{16}\text{H}_{10}\text{NOS}$  : 266.0483; found: 266.0477.

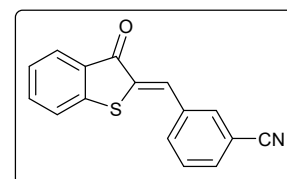

**(E)-1-Benzyl-5-methyl-3-(3-oxobenzob[thiophen-2(3H)-ylidene) indolin-2-one (5):** 83% yield (127 mg); dark red solid; mp 234-236 °C;  $R_f = 0.39$  (15% ethyl acetate in hexanes); FTIR (KBr) 2983, 1672, 1587, 1271, 736  $\text{cm}^{-1}$ ;  $^1\text{H}$  NMR ( $\text{CDCl}_3$ , 400 MHz)  $\delta$  9.00 (s, 1H), 7.88 (d,  $J = 7.6$  Hz, 1H), 7.59 (t,  $J = 7.6$  Hz, 1H), 7.48 (d,  $J = 8.0$  Hz, 1H), 7.08 (d,  $J = 7.6$  Hz, 1H), 7.34-7.25 (m, 6H), 6.63 (d,  $J = 8.0$  Hz, 1H), 4.99 (s, 2H), 2.38 (s, 3H);  $^{13}\text{C}$  NMR ( $\text{CDCl}_3$ , 100 MHz)  $\delta$  190.5, 168.8, 147.7, 141.7, 139.7, 136.0, 135.7, 132.7, 132.4, 129.7, 128.9, 127.8, 127.5, 127.4, 126.8, 126.0, 124.2, 121.2, 108.9, 44.1, 21.5; HRMS (m/z)  $[\text{M}+\text{Na}]^+$  calculated for  $\text{C}_{24}\text{H}_{17}\text{NO}_2\text{SNa}$  : 406.0878; found: 406.0884.

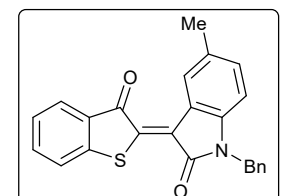

**(E)-O-Ethyl S-(2-(3-(p-tolyl)acryloyl)phenyl)carbonodithioate (9):** orange solid ; mp 54-56 °C;  $R_f = 0.52$  (10% ethyl acetate in hexanes); FTIR (KBr) 3026, 2981, 1647, 1597, 1286, 766  $\text{cm}^{-1}$ ;  $^1\text{H}$  NMR ( $\text{CDCl}_3$ , 400 MHz)  $\delta$  7.63-7.53 (m, 4H), 7.46-

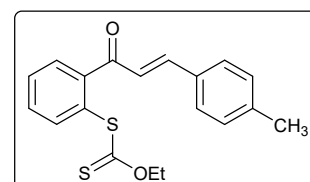

7.39 (m, 3H), 7.18 (d,  $J = 7.6$  Hz, 2H), 7.07 (d,  $J = 16$  Hz, 1H), 4.52 (q,  $J = 7.2$  Hz, 2H), 2.37 (s, 3H), 1.27 (t,  $J = 6.8$  Hz, 3H);  $^{13}\text{C}$  NMR ( $\text{CDCl}_3$ , 100 MHz)  $\delta$  212.2, 194.7, 146.4, 144.7, 141.5, 137.5, 131.9, 130.8, 130.4, 129.9, 129.8, 128.8, 128.7, 127.9, 125.5, 70.6, 21.7, 13.6; HRMS ( $m/z$ )  $[\text{M}+\text{Na}]^+$  calculated for  $\text{C}_{19}\text{H}_{18}\text{O}_2\text{S}_2\text{Na}$ : 365.0646; found: 365.0645.

**Ethyl-S-(2-(3-(p-tolyl)propanoyl)phenyl) carbonodithioate (10)** lime green liquid ;  $R_f = 0.53$  (7% ethyl acetate in hexanes); FTIR (KBr) 3053, 2981, 2924, 1697, 1230, 1032, 810, 758  $\text{cm}^{-1}$ ;  $^1\text{H}$  NMR ( $\text{CDCl}_3$ , 400 MHz)  $\delta$  7.62-7.54 (m, 1H), 7.54-7.47 (m, 3H), 7.13-7.09 (m, 4H), 4.56 (q,  $J = 7.2$  Hz, 2H), 3.20 (t,  $J = 7.2$  Hz, 2H), 2.98 (t,  $J = 7.6$  Hz, 2H), 2.31 (s, 3H), 1.30 (t,  $J = 6.8$  Hz, 3H);  $^{13}\text{C}$  NMR ( $\text{CDCl}_3$ , 100 MHz)  $\delta$  212.0, 203.3, 144.7, 137.9, 137.5, 135.7, 131.1, 130.4, 129.3, 128.4, 128.1, 127.6, 70.7, 44.3, 30.0, 21.1, 13.7; HRMS ( $m/z$ )  $[\text{M}+\text{Na}]^+$  calculated for  $\text{C}_{19}\text{H}_{20}\text{O}_2\text{S}_2\text{Na}$ : 367.0802; found: 367.0799.

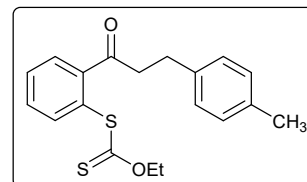

### 3. References.

- 1) A. K. Elena, I. S. Nadya, D. F. Victor, K. Paul, *Synthesis*. 2007, **1**, 81-84.
- 2) M. Ana, Z. Xiaolai, L. B. Stephen, *J. Org. Chem.* 2007, **72**, 9253-9258.
- 3) S. K. Pagire, N. Kumagai, M. Shibasaki, *ACS Catal.* 2021, **11**, 18, 11597-11606.
- 4) T. B. Nguyen, P. Retailleau, *Org. Lett.* 2018, **20**, 186-189
- 5) J. I. Lee, *Bull. Korean. Chem. Soc.* 2019, **40**, 70-73.
- 6) B. Maerz, S. Wiedbrauk, S. Oesterling, E. Samoylova, A. Nenov, P. Mayer, R. De Vivie-Riedle, W. Zinth, H. Dube, *Chem. Eur. J.* 2014, **20**, 13984 -13992.
- 7) A. W. Taylor, D. K. Dean, *Tetrahedron Lett.* 1988, **29**, 1845-1848.
- 8) Y. Q. Zhang, A. M. Yu, J. R. Jia, S. S. Ma, K. Li, Y. Wei, X. T. Meng, *Chem. Commun.* 2017, **53**, 10672-10675.
- 9) M. G. Cabiddu, S. Cabiddu, E. Cadoni, S. De Montis, C. Fattuoni, S. Melis, M. Usai, *Synthesis*. 2002, **7**, 875-878.
- 10) T. K. Pradhan, A. De, J. Mortier, *Tetrahedron.*, 2005, **61**, 9007-9017.
- 11) S. Venkateswarlu, G. N. Murty, M. Satyanarayana, V. Siddaiah, *Syn. Commun.* 2020, **50**, 2347-2354.

## 5.0. HRMS data for compound E.

### Compound Details

Cpd. 1: C<sub>19</sub>H<sub>19</sub>I O<sub>2</sub>S<sub>2</sub>

Compound Spectra (overlaid)

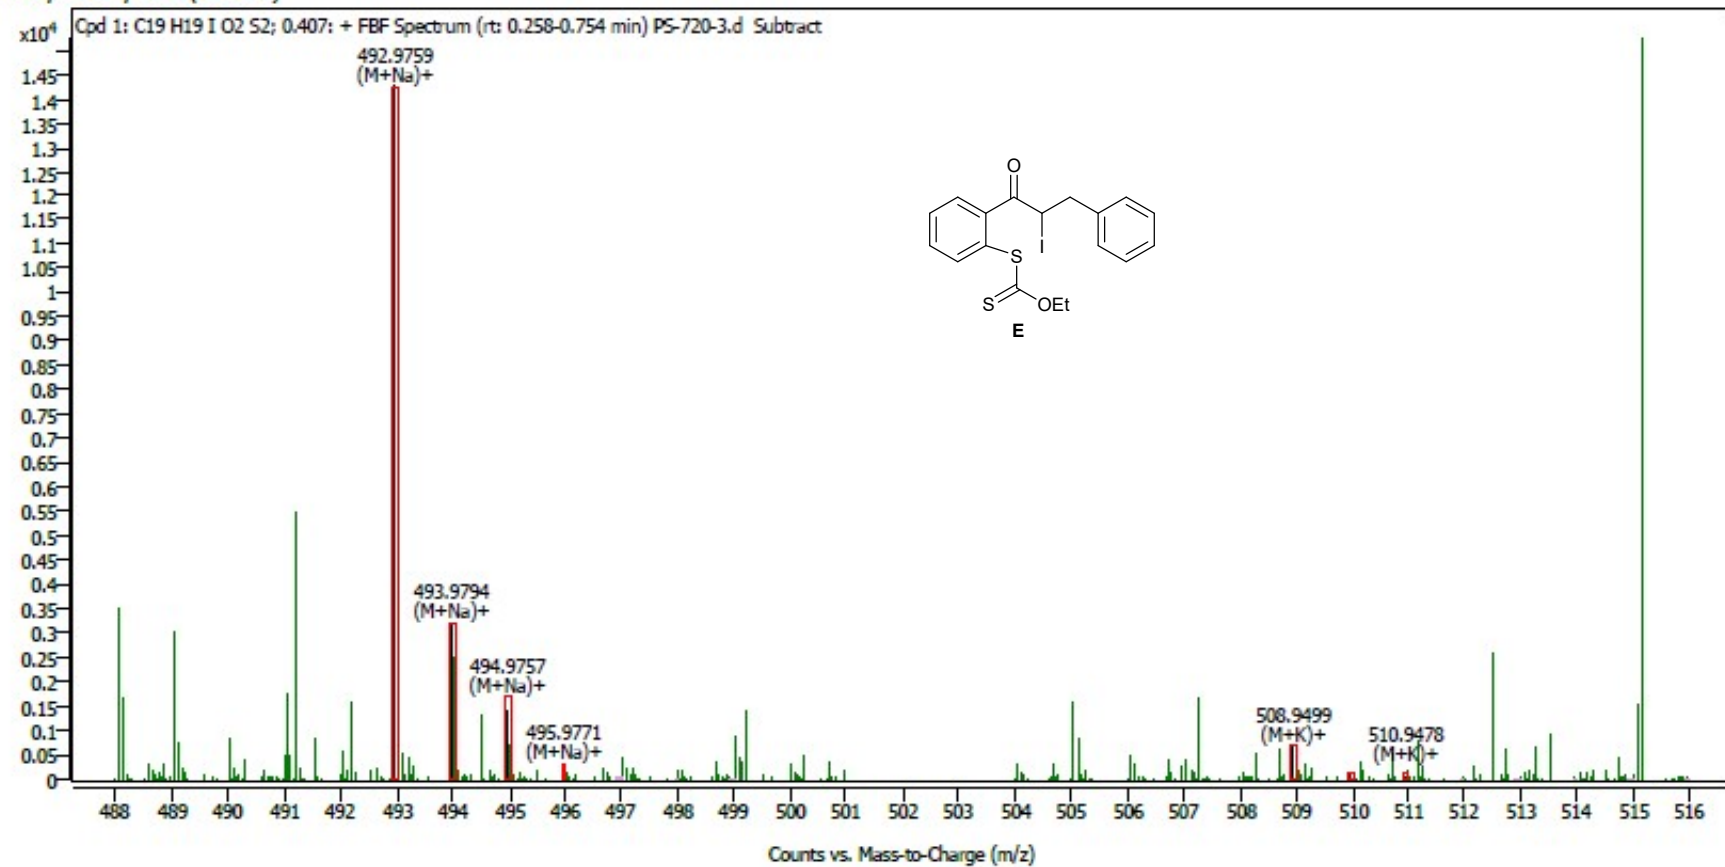

Compound ID Table

| Cpd | Formula                                                         | Mass (Tgt) | Calc. Mass | Mass     | Species | Diff(Tgt.ppm) | mDa   |
|-----|-----------------------------------------------------------------|------------|------------|----------|---------|---------------|-------|
| 1   | C <sub>19</sub> H <sub>19</sub> I O <sub>2</sub> S <sub>2</sub> | 469.9871   | 469.9869   | 492.9759 | (M+Na)+ | -0.43         | -0.20 |
|     |                                                                 |            |            | 508.9499 | (M+K)+  |               |       |



2.0.  $^1\text{H}$  and  $^{13}\text{C}$  spectra for all compounds.

$^1\text{H}$  NMR spectrum of compound 2a

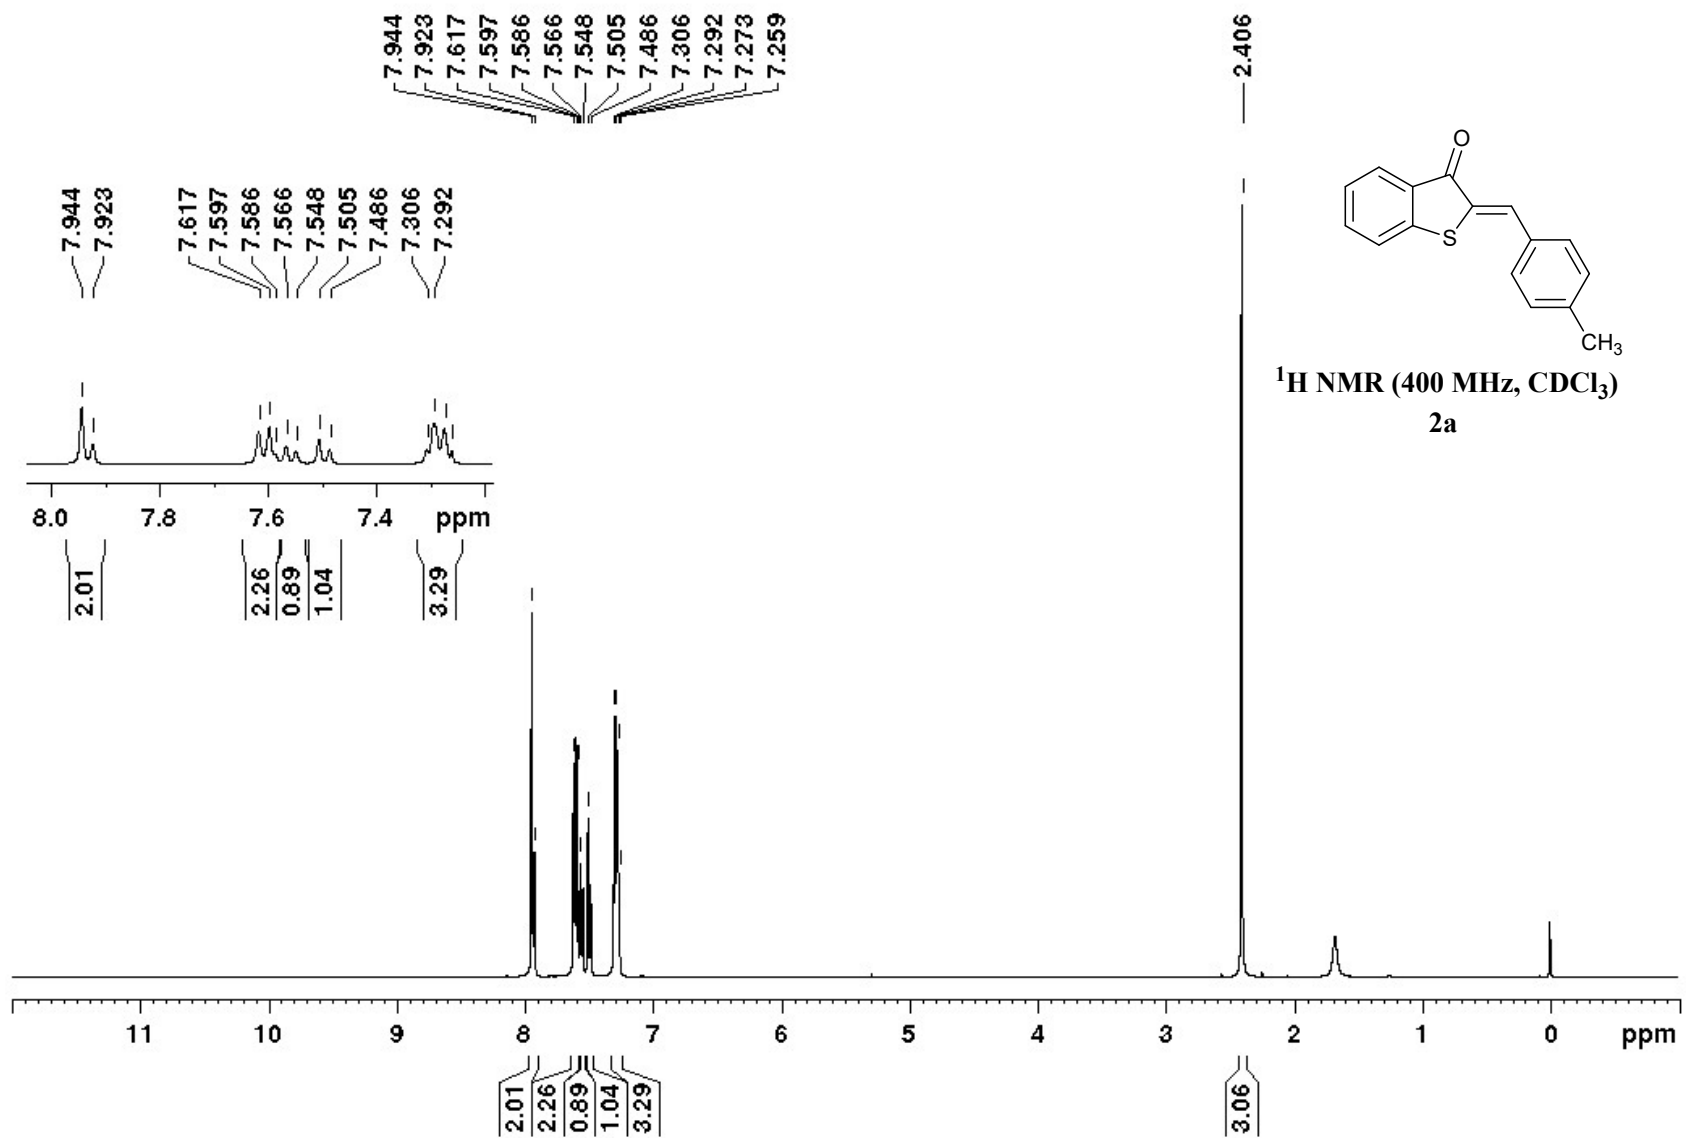

<sup>13</sup>C NMR spectrum of compound 2a

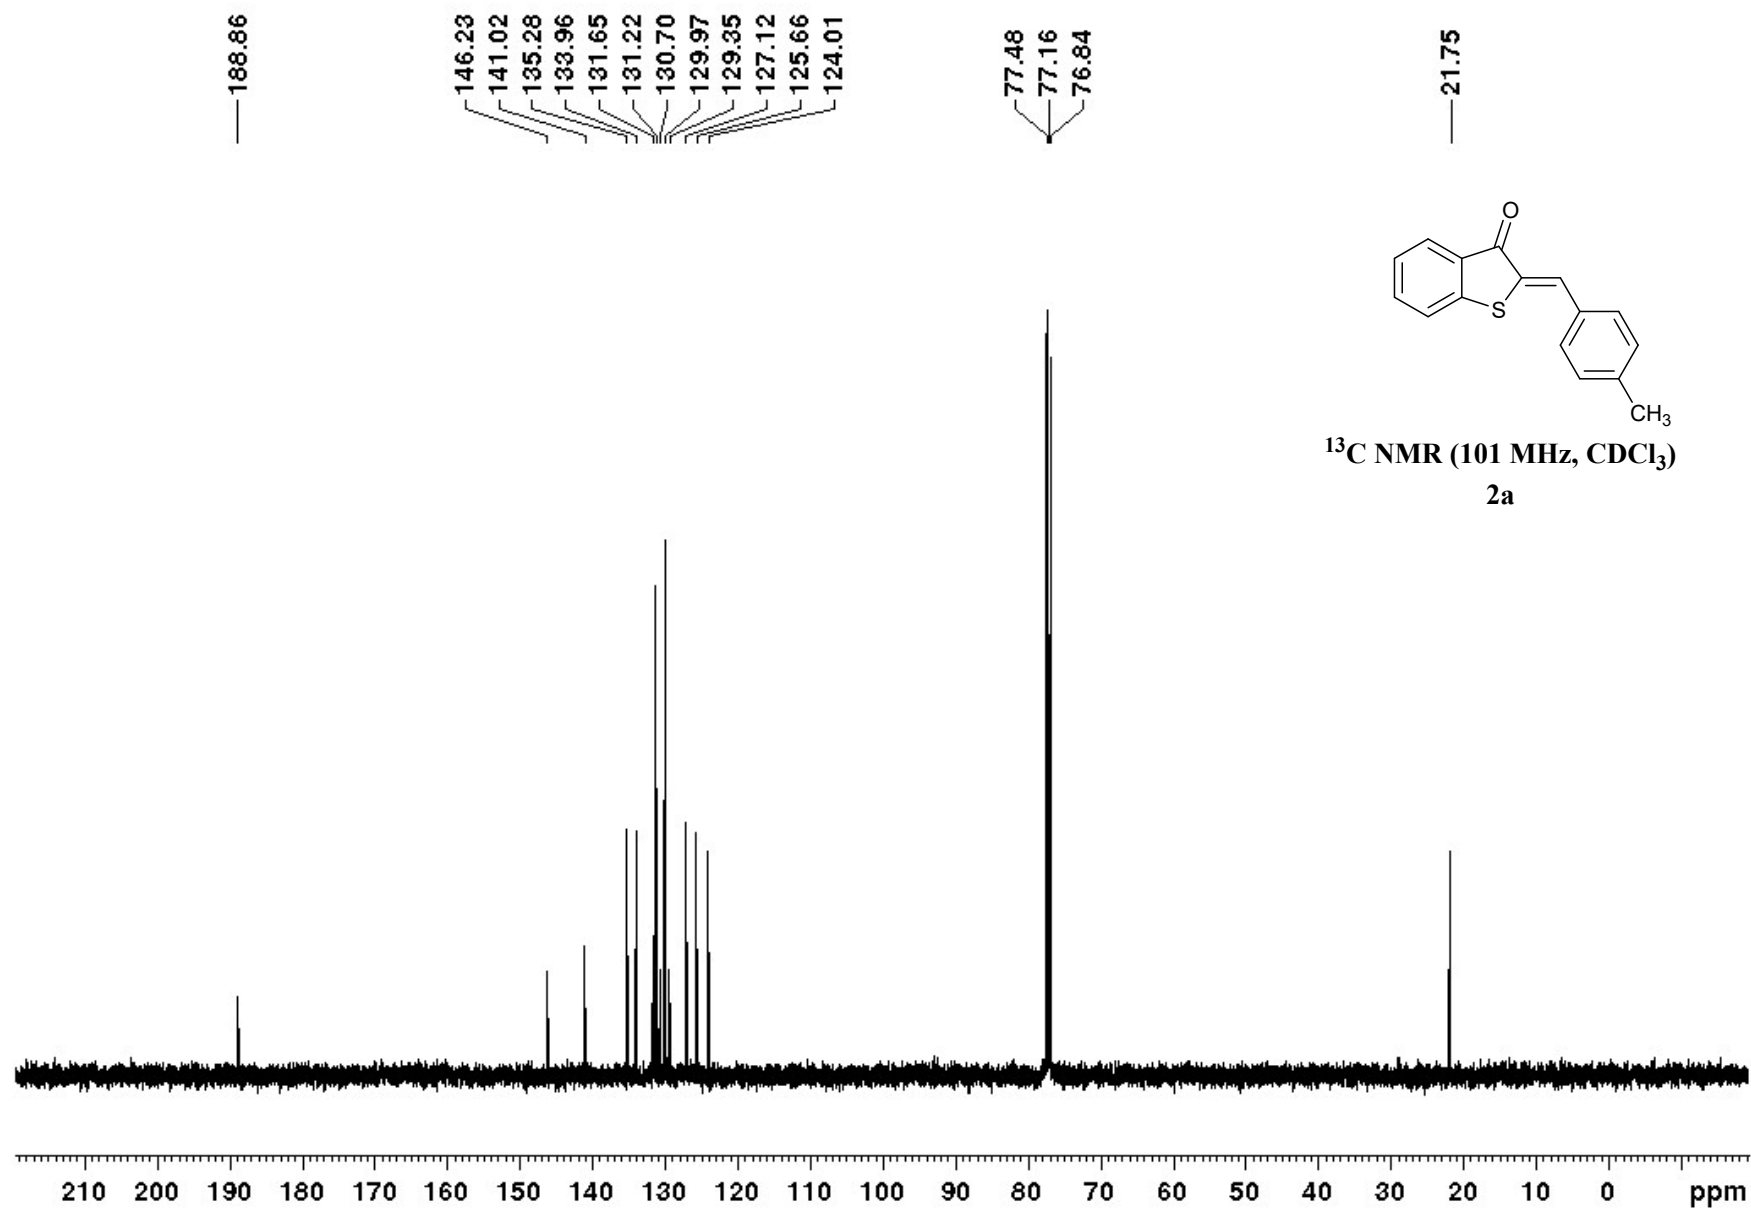

<sup>1</sup>H NMR spectrum of compound 2b

7.959  
7.947  
7.927  
7.716  
7.697  
7.588  
7.569  
7.551  
7.502  
7.481  
7.462  
7.431  
7.414  
7.395  
7.309  
7.291  
7.272  
7.260

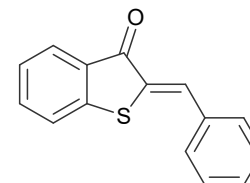

<sup>1</sup>H NMR (400 MHz, CDCl<sub>3</sub>)  
2b

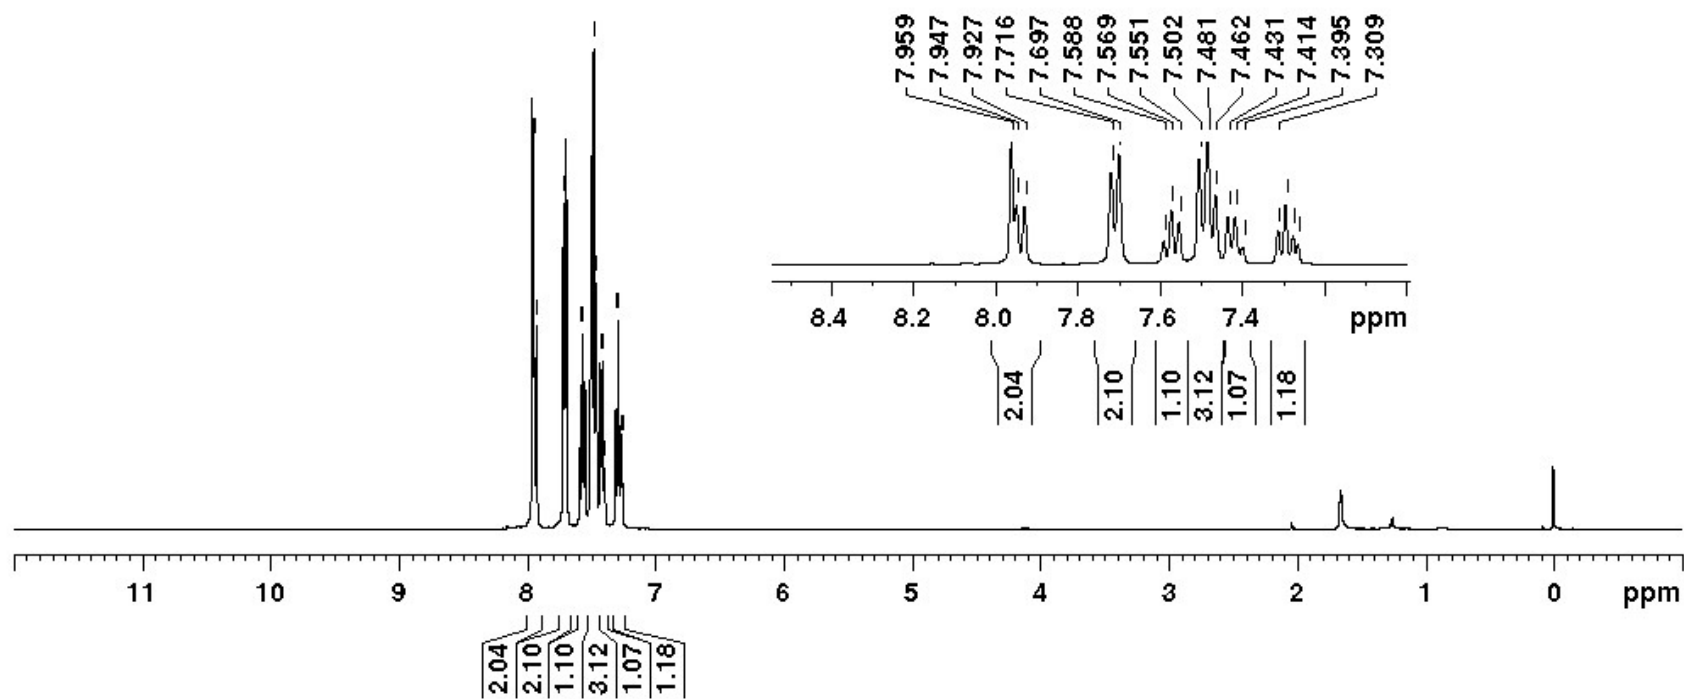

<sup>13</sup>C NMR spectrum of compound 2b

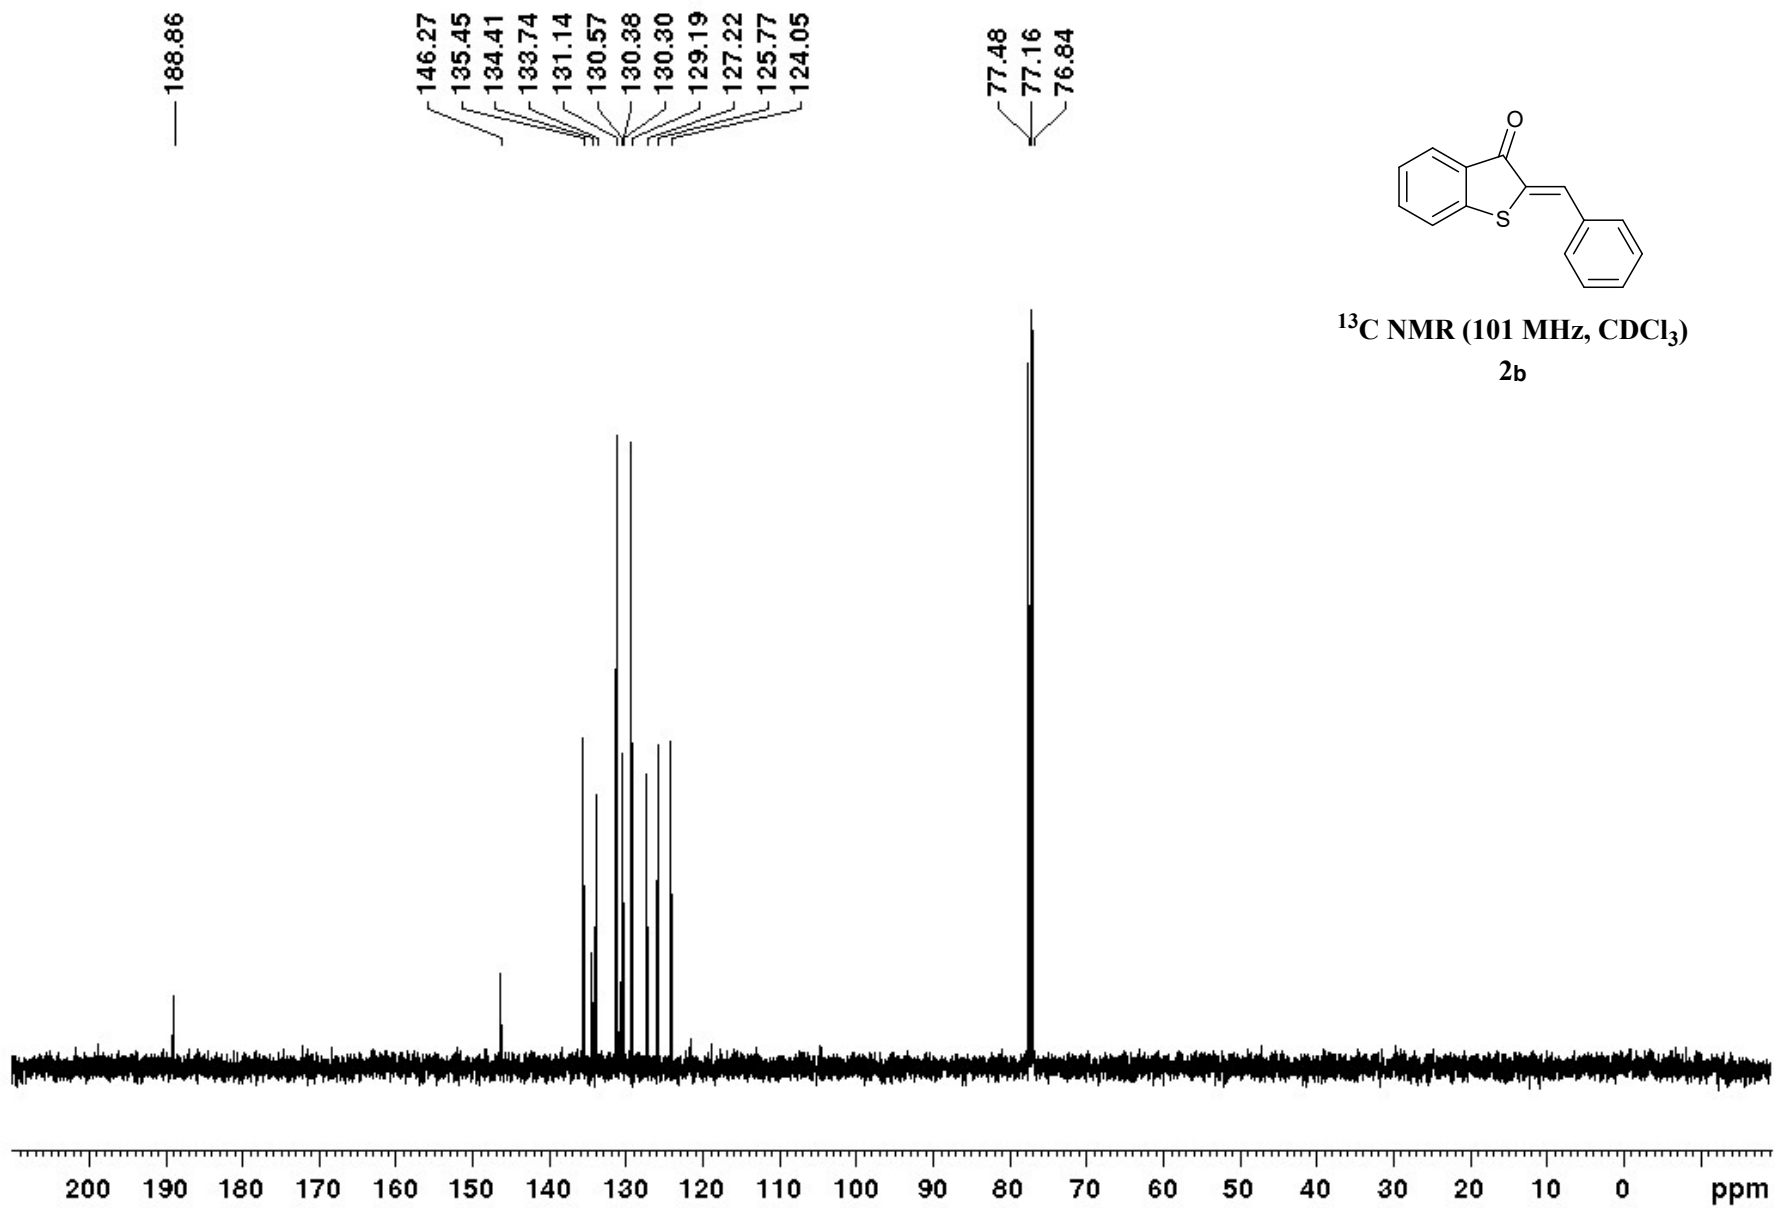

<sup>1</sup>H NMR spectrum of compound 2c

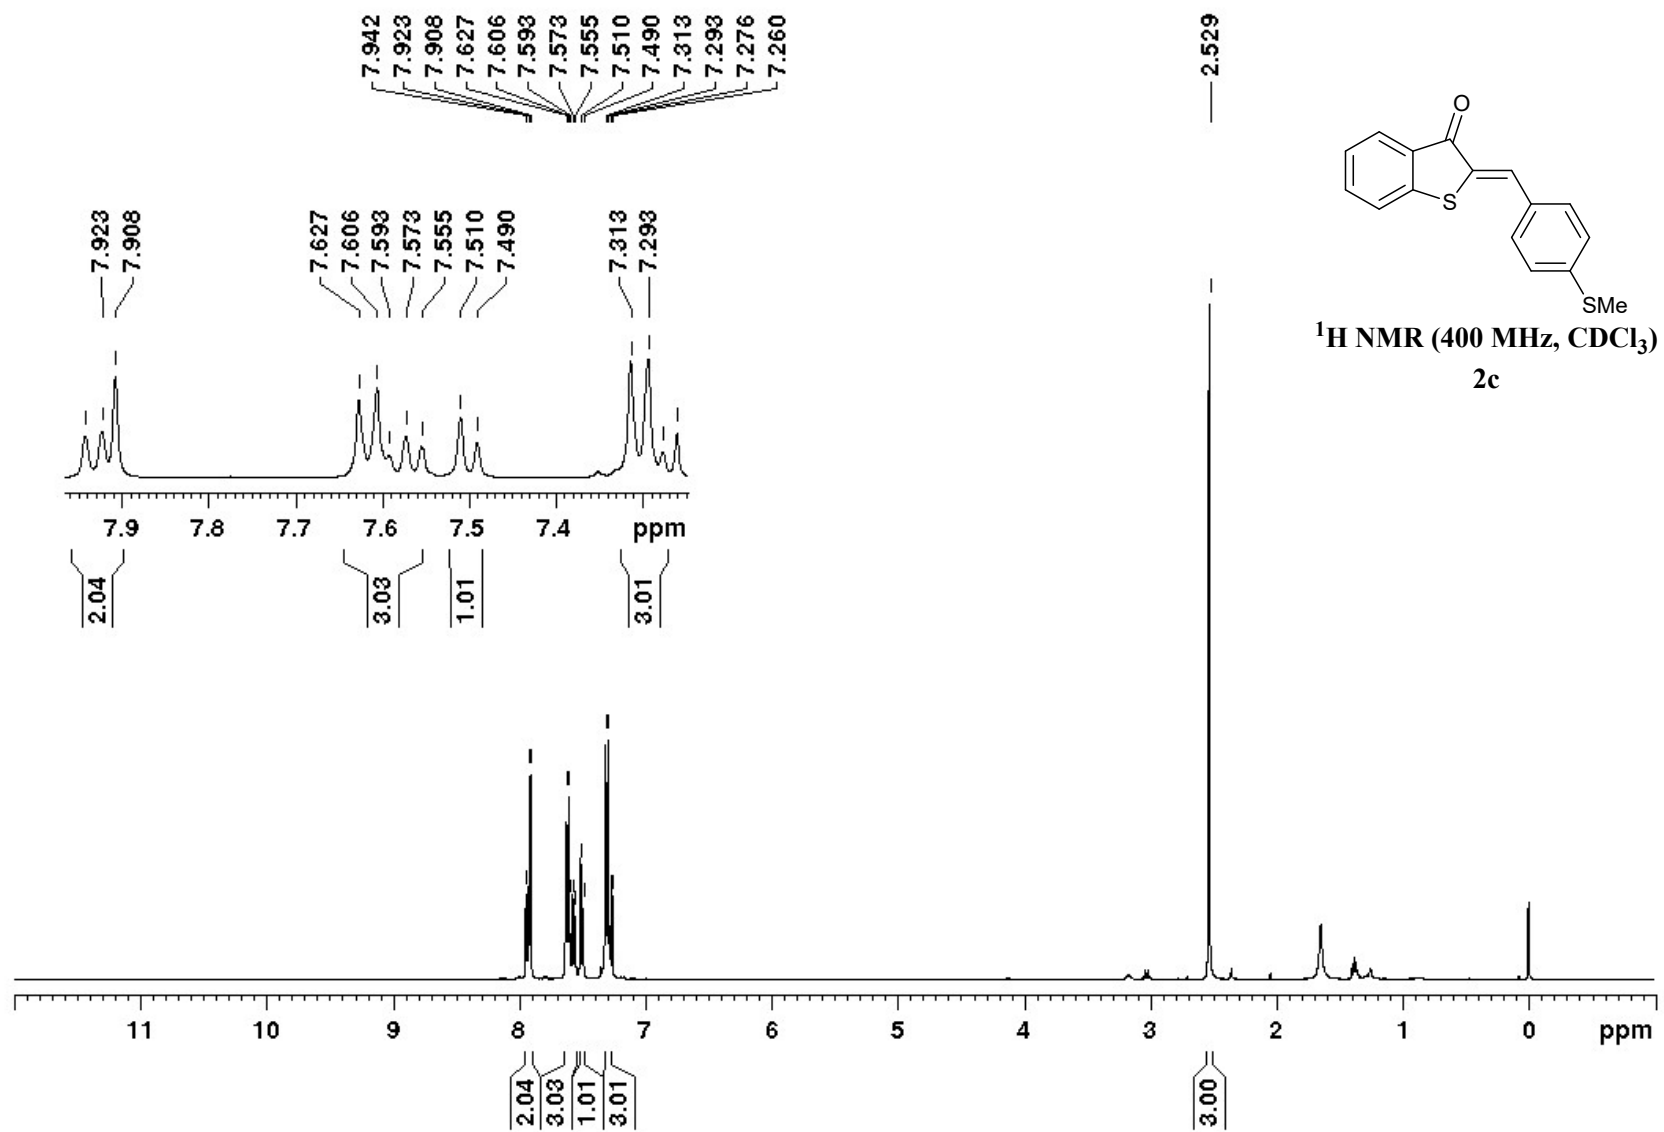

<sup>13</sup>C NMR spectrum of compound 2c

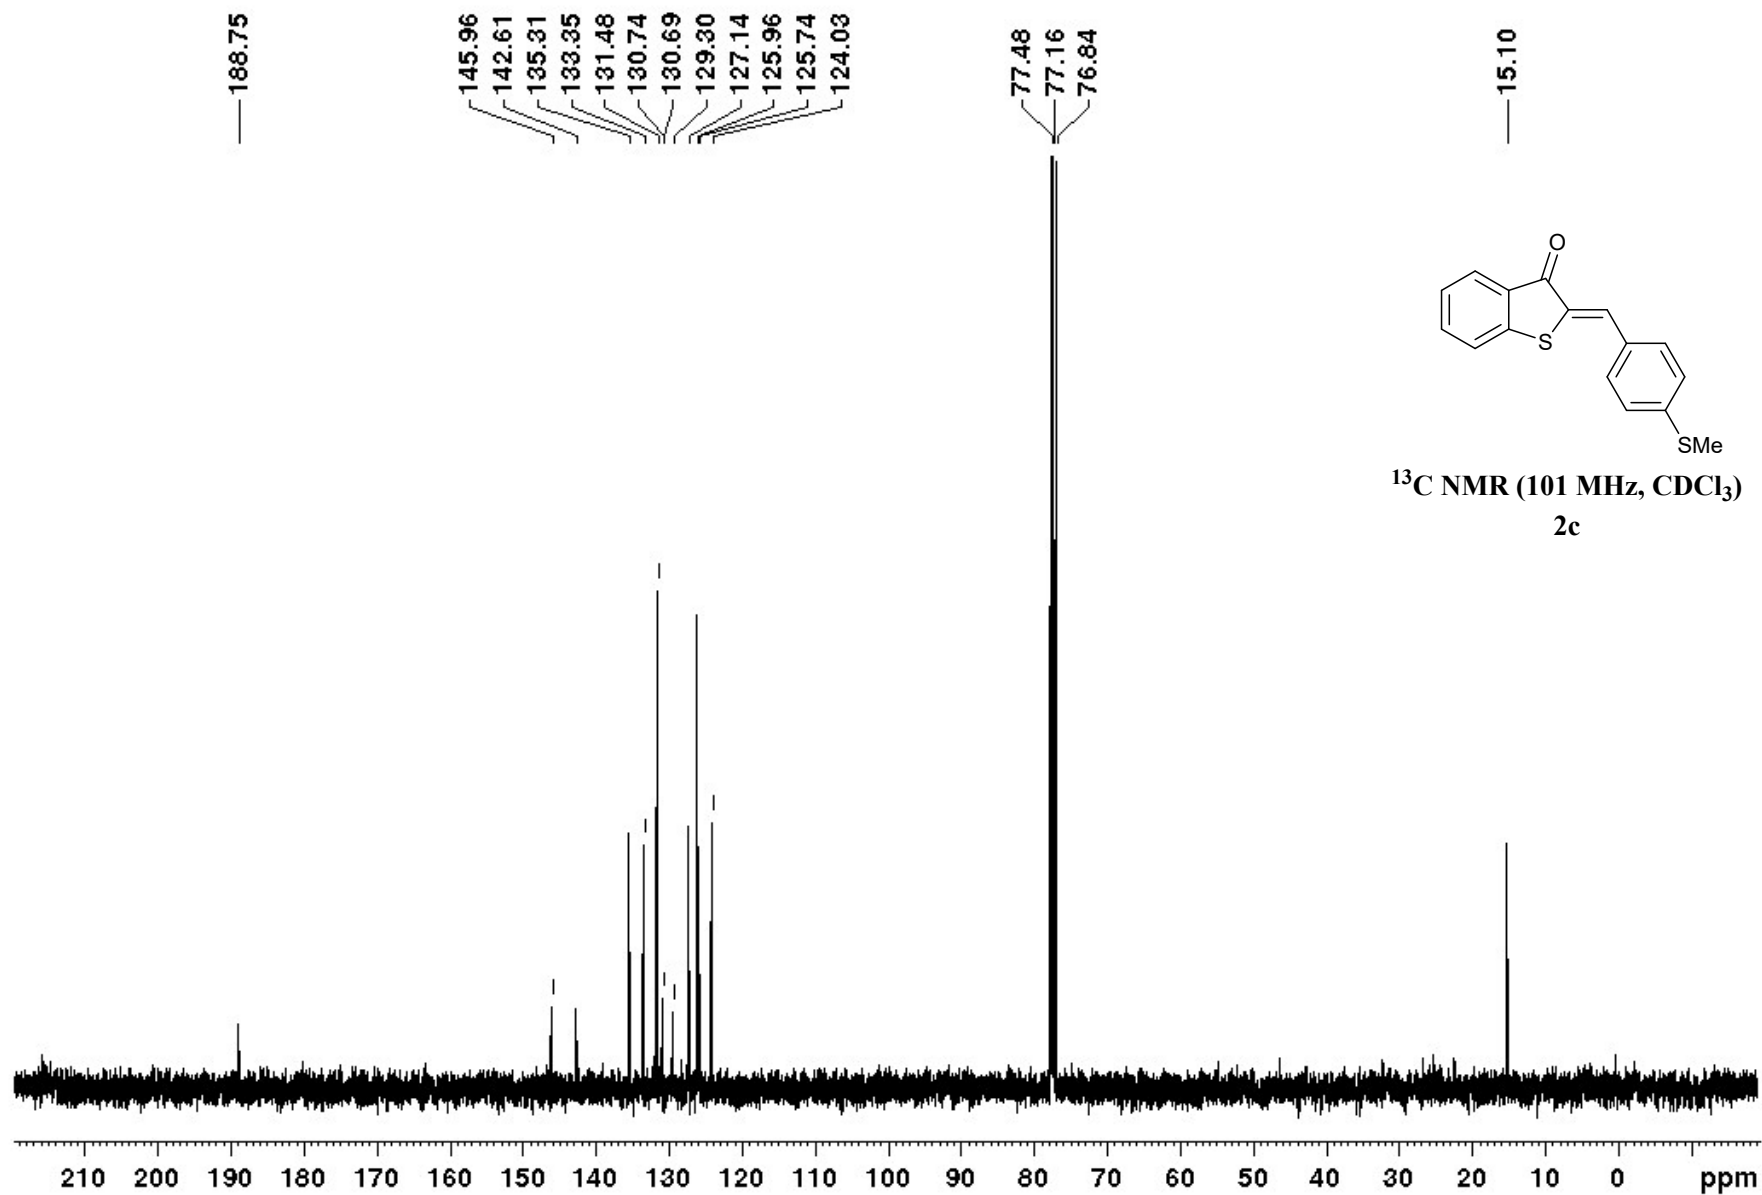

<sup>1</sup>H NMR spectrum of compound 2d

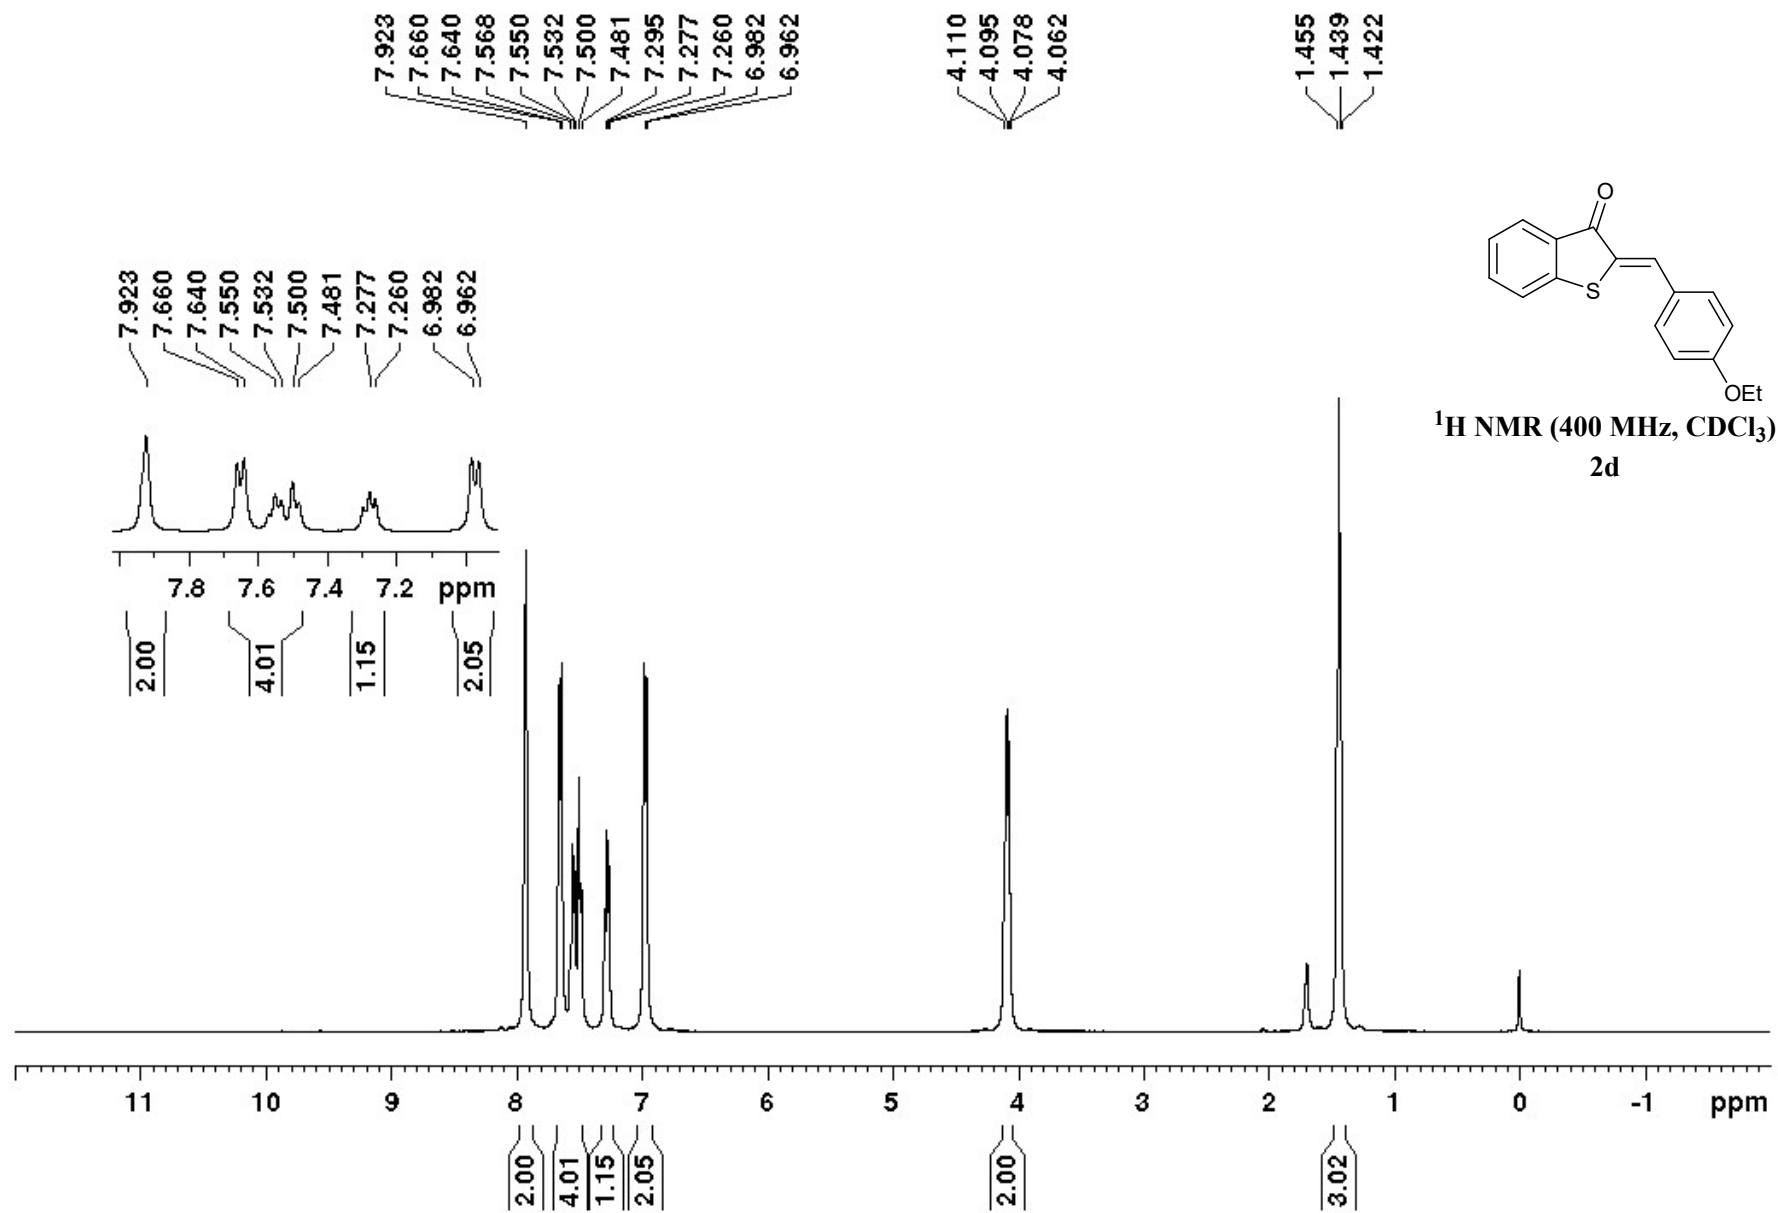

<sup>13</sup>C NMR spectrum of compound 2d

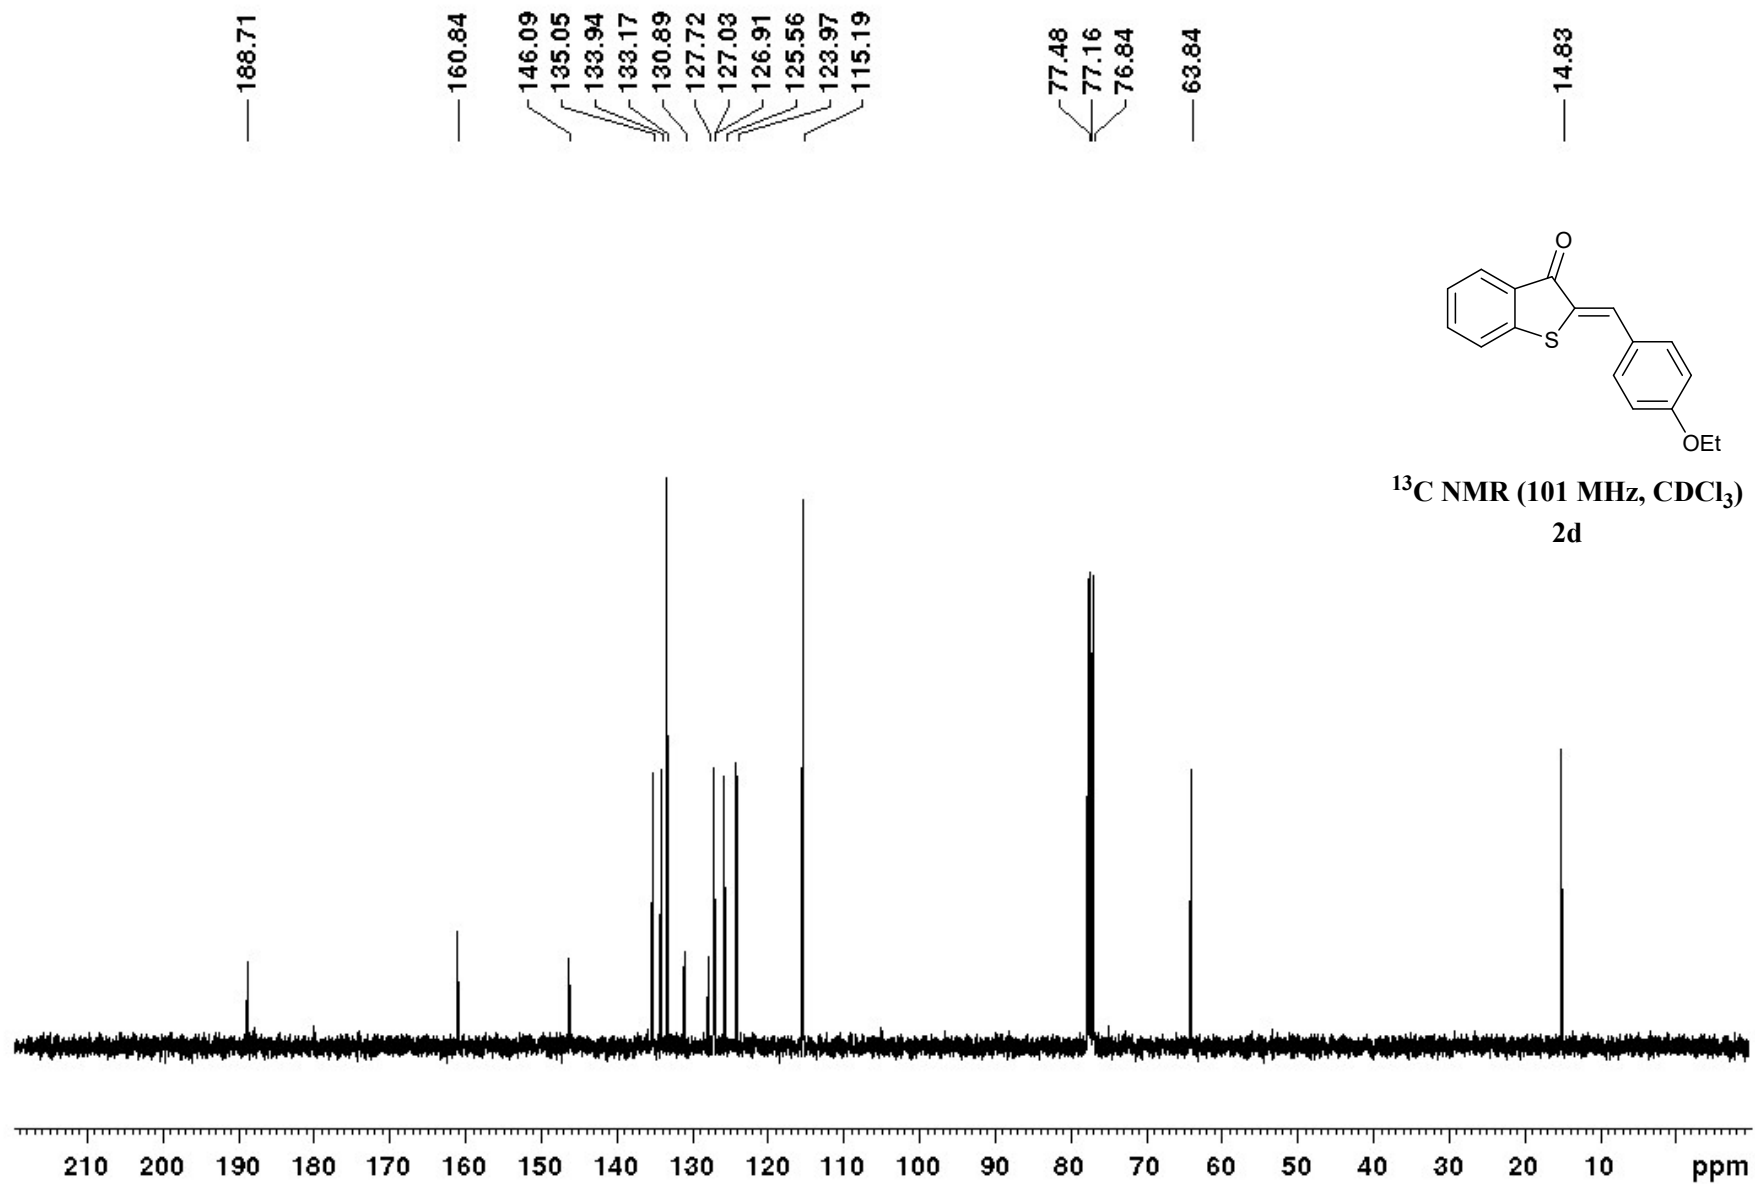



<sup>1</sup>H NMR spectrum of compound 2e

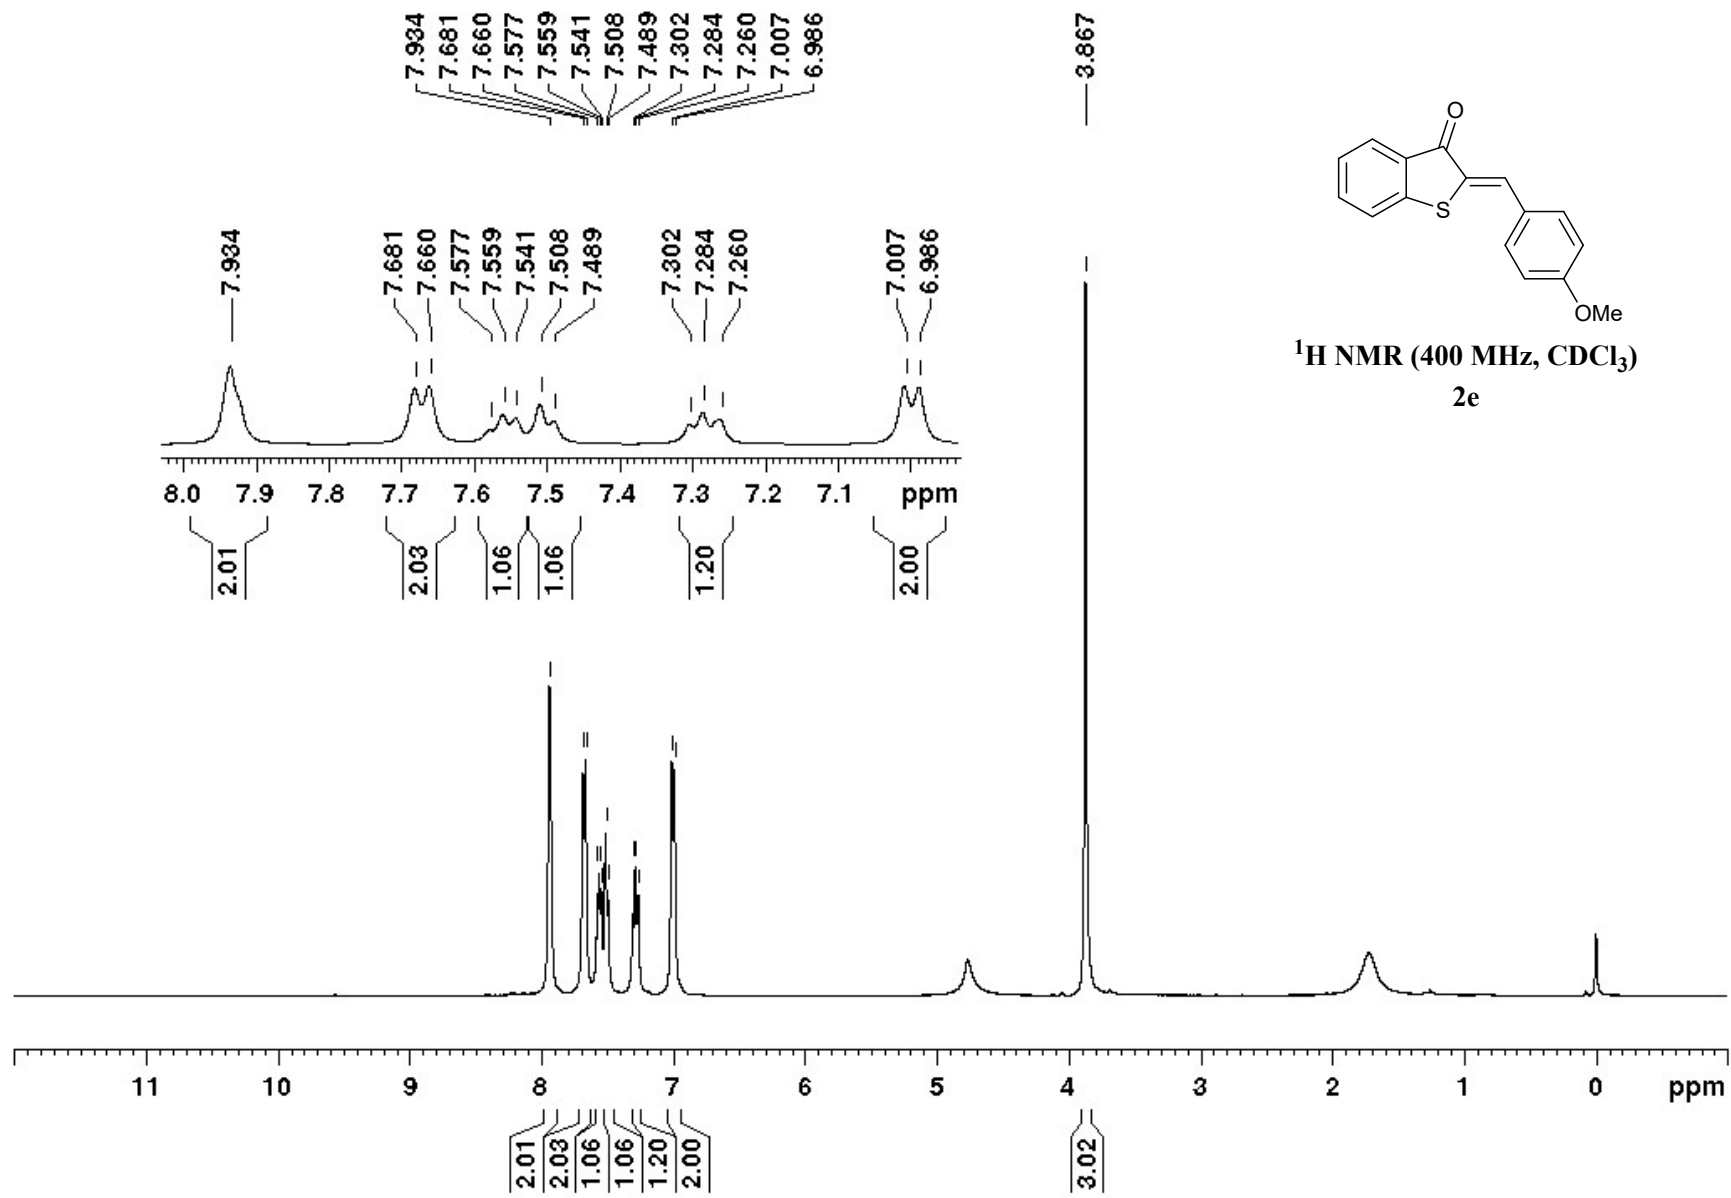

<sup>13</sup>C NMR spectrum of compound 2e

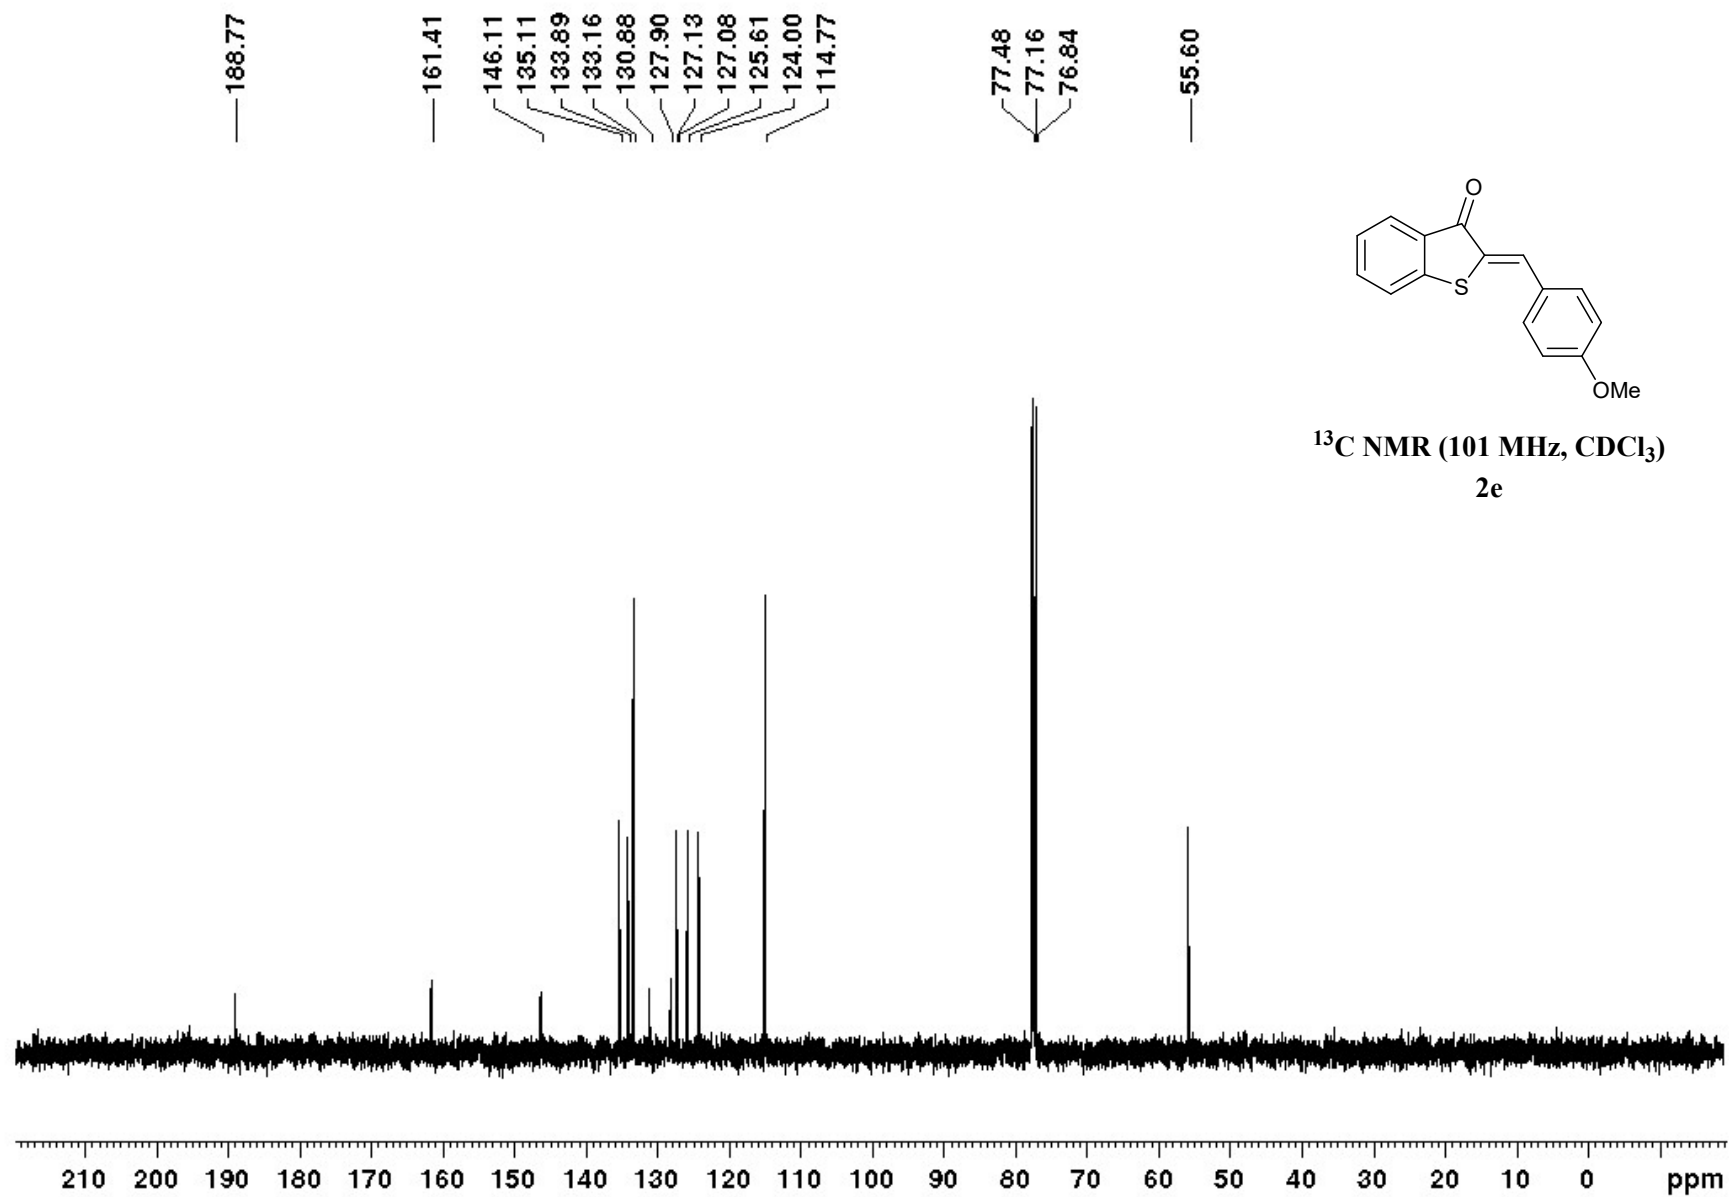

<sup>1</sup>H NMR spectrum of compound 2f

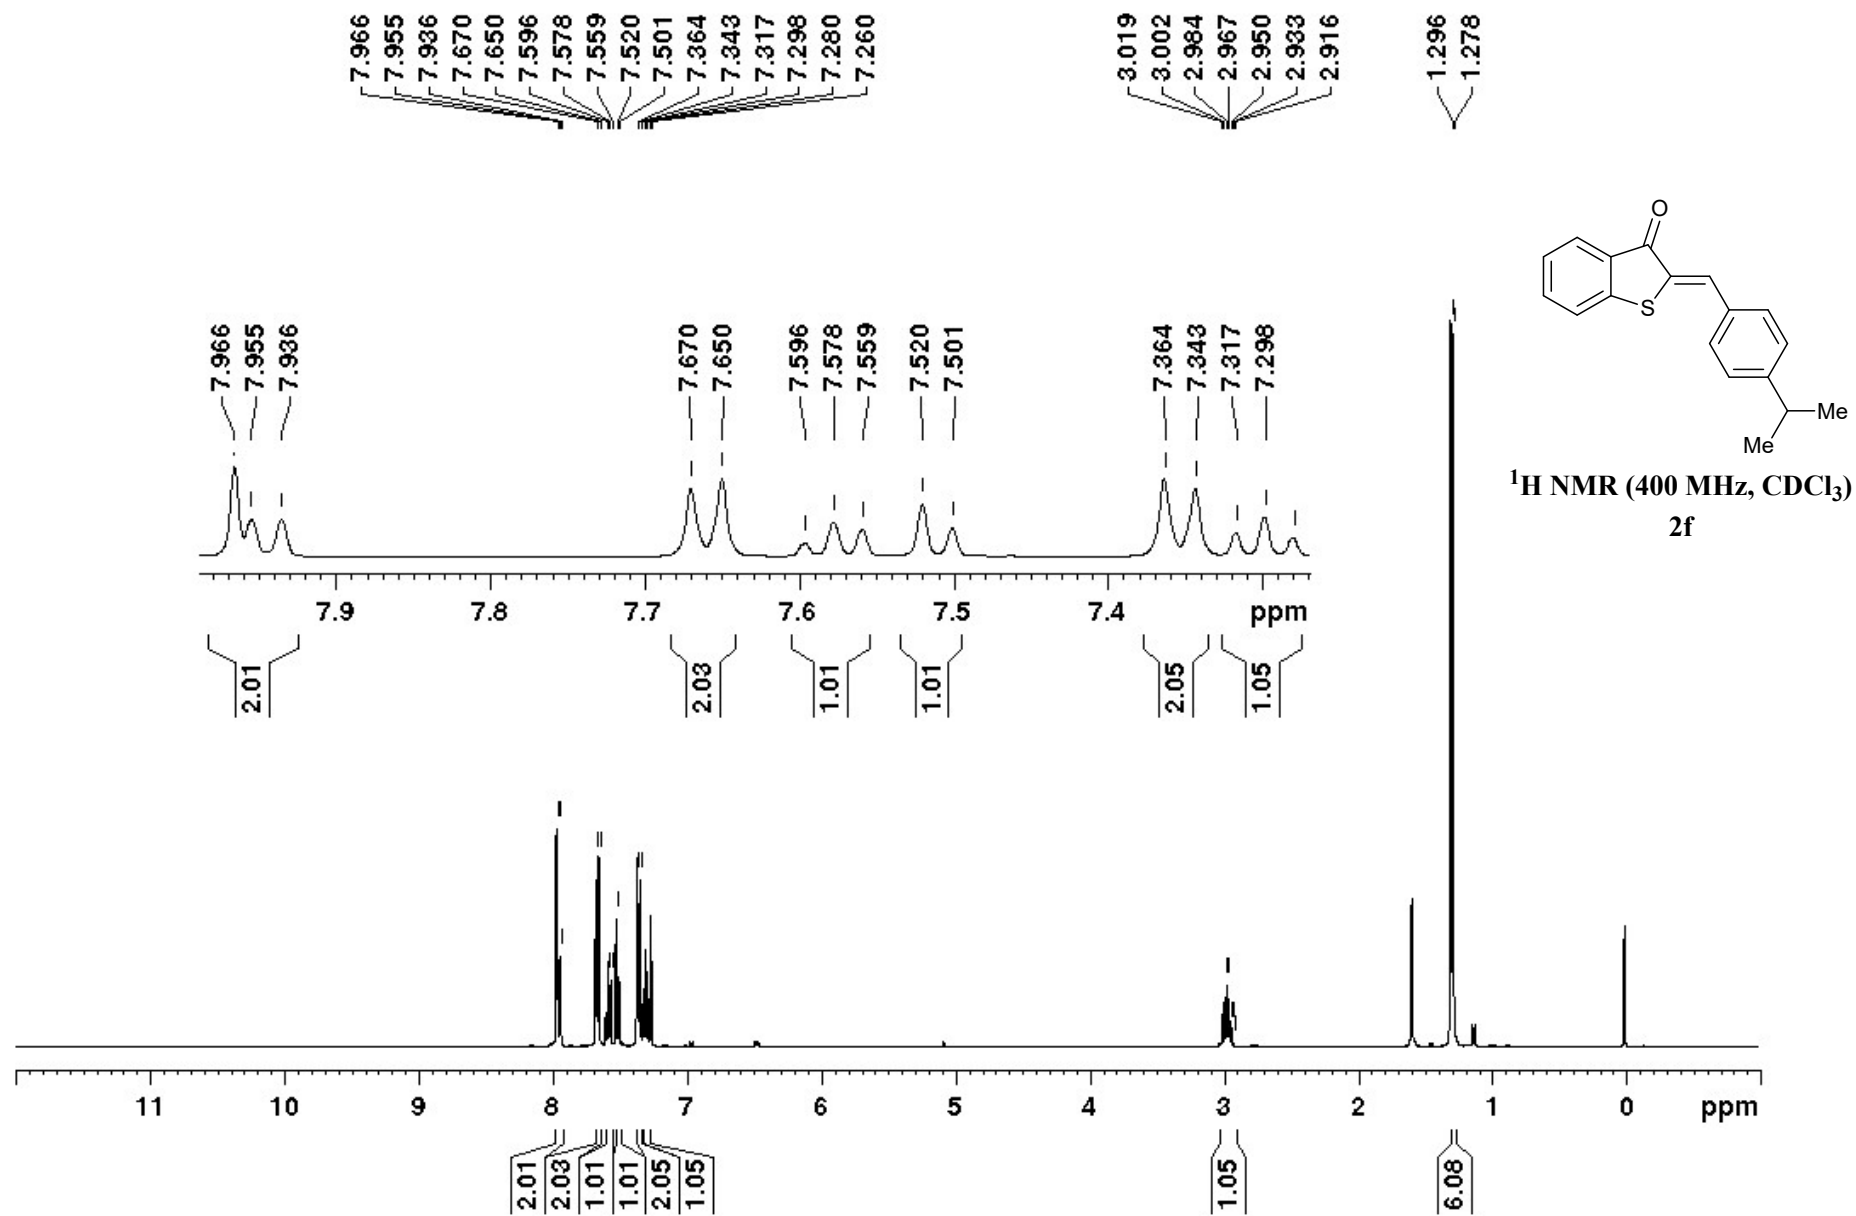

<sup>13</sup>C NMR spectrum of compound 2f

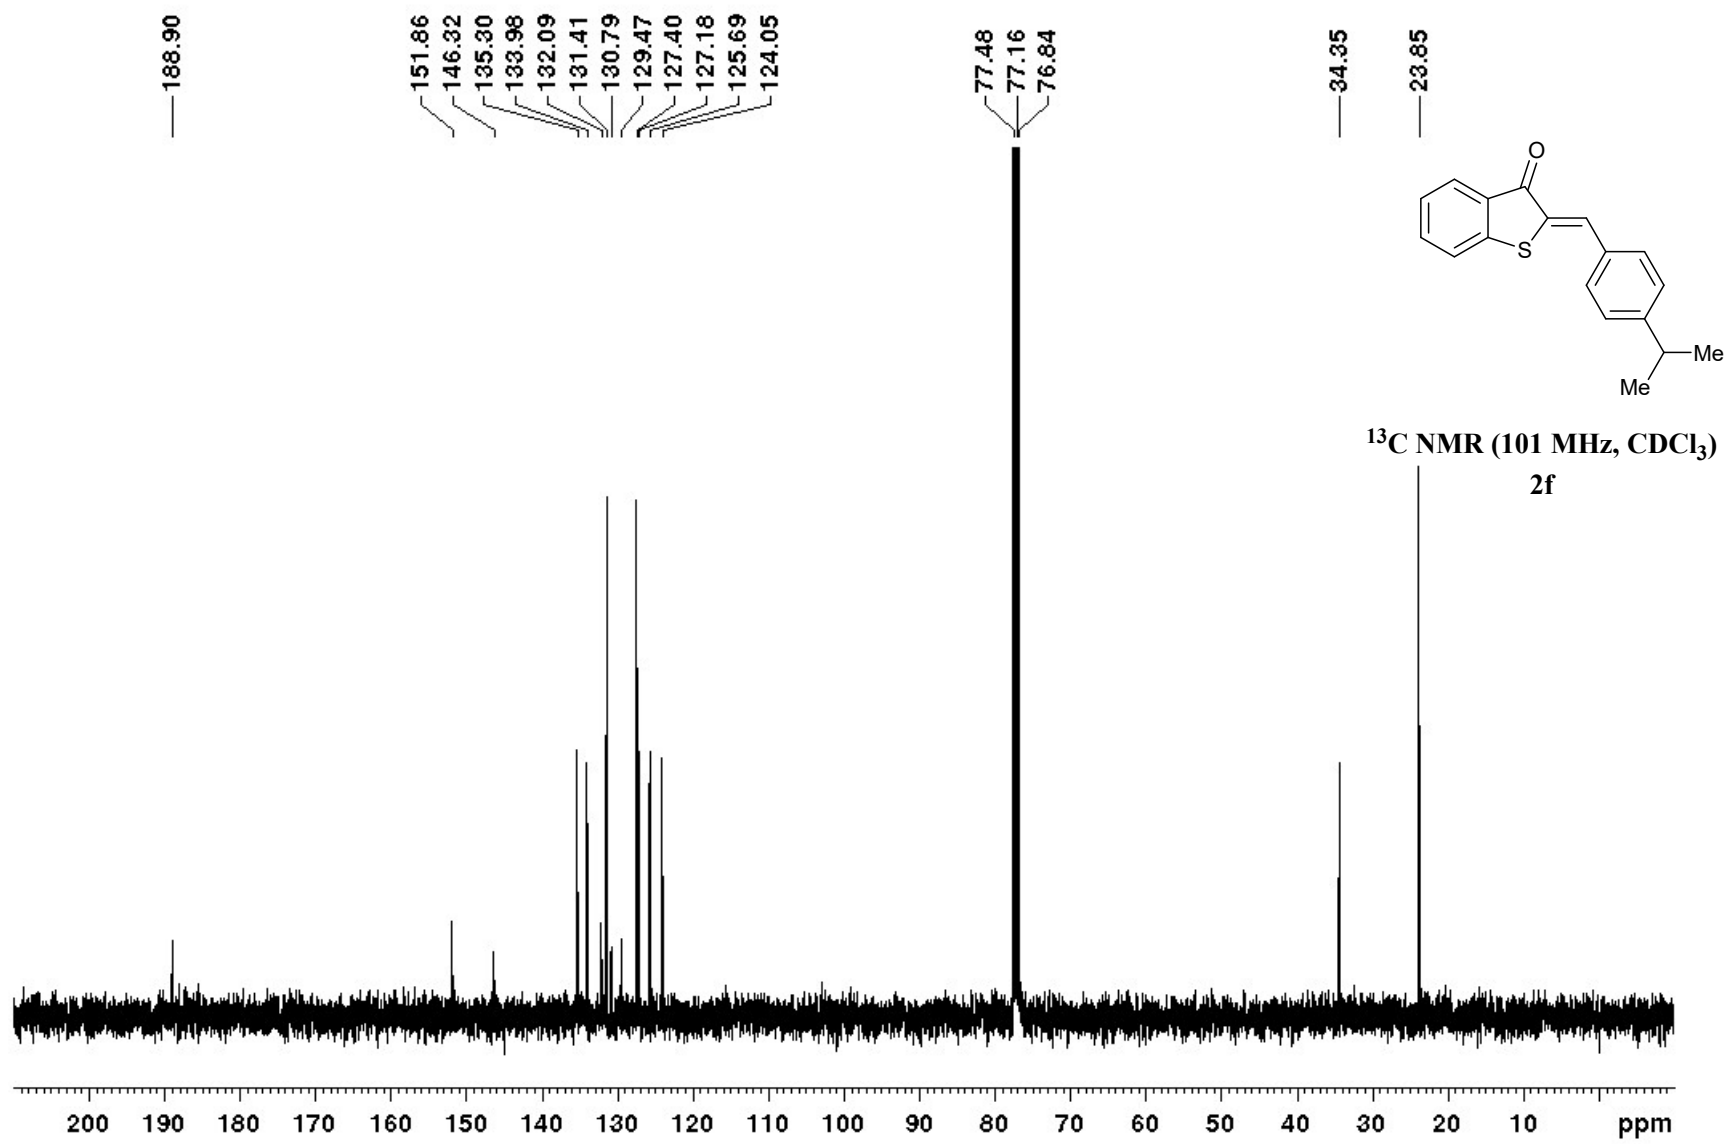

<sup>1</sup>H NMR spectrum of compound 2g

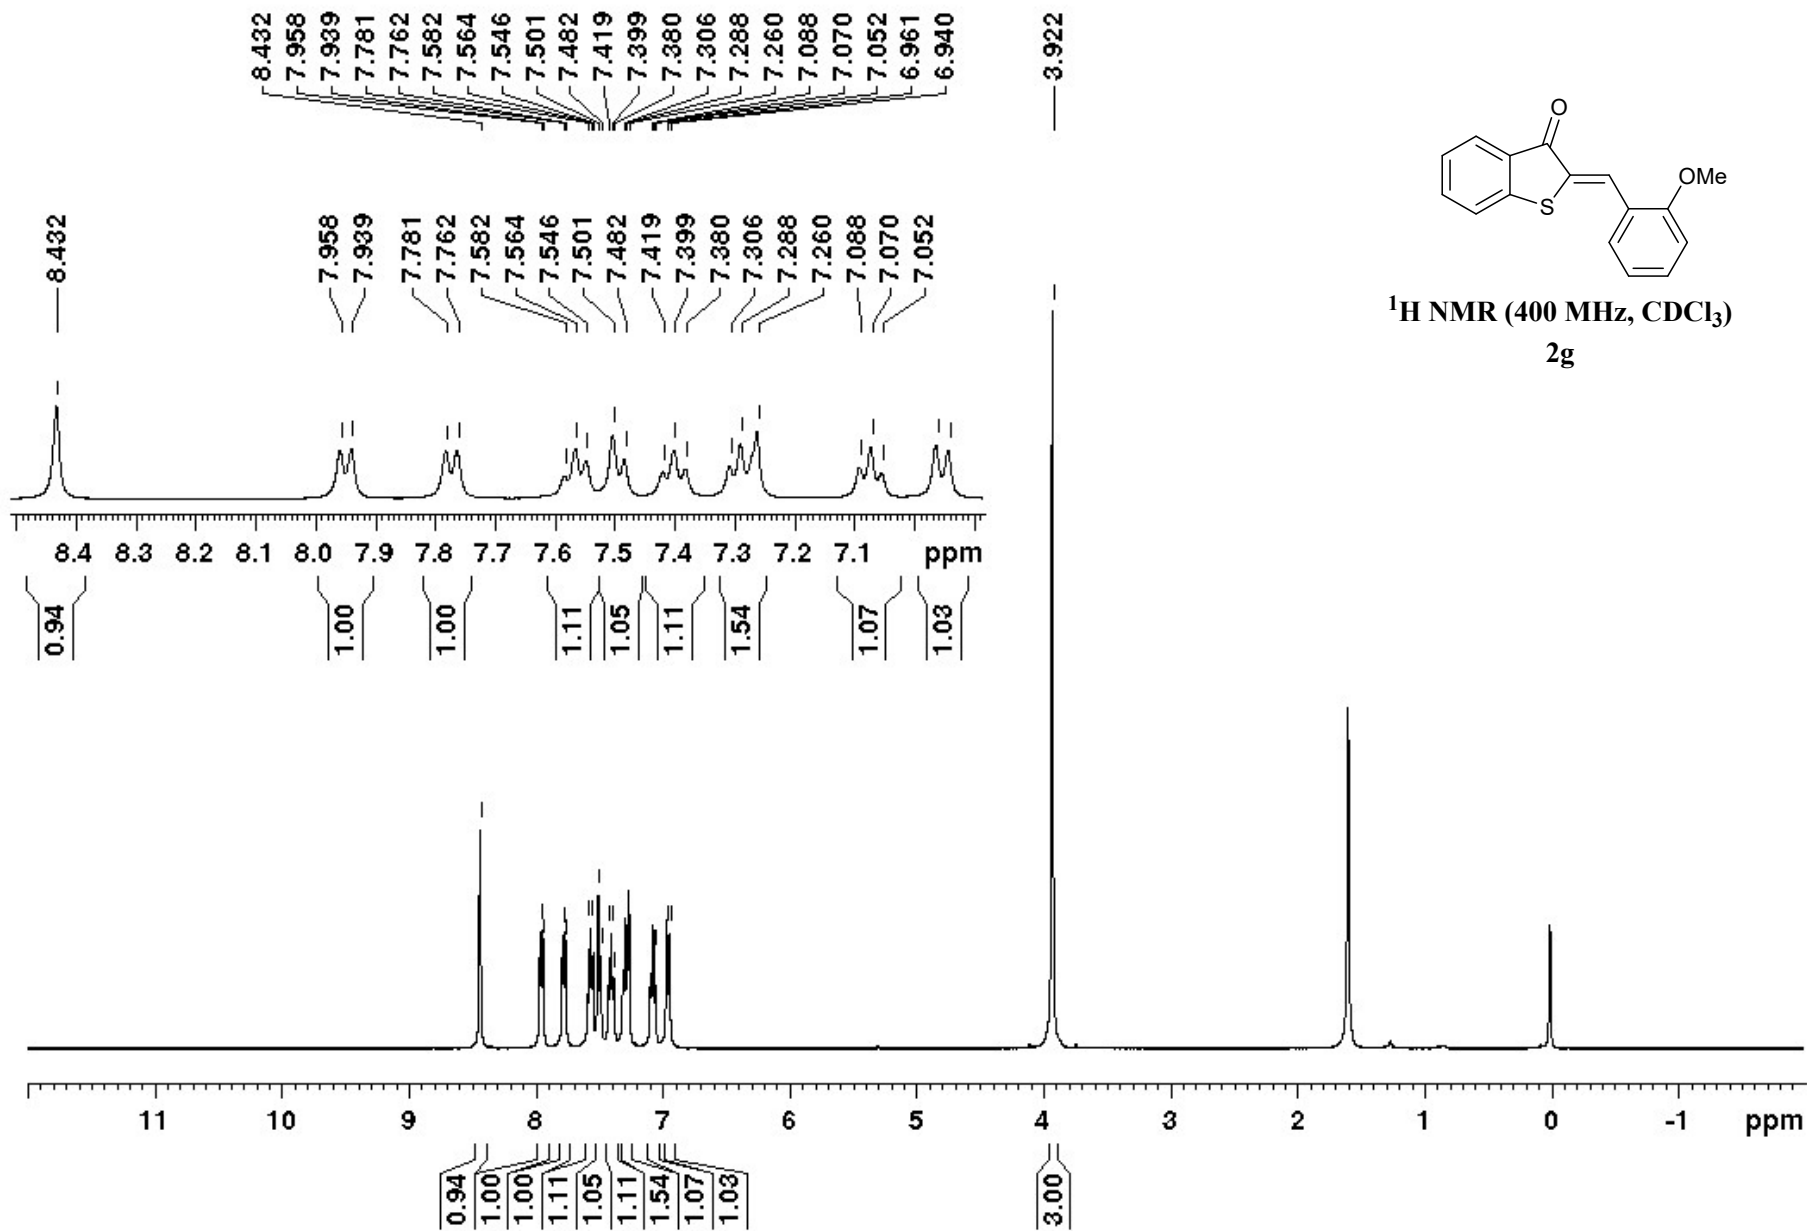

<sup>13</sup>C NMR spectrum of compound 2g

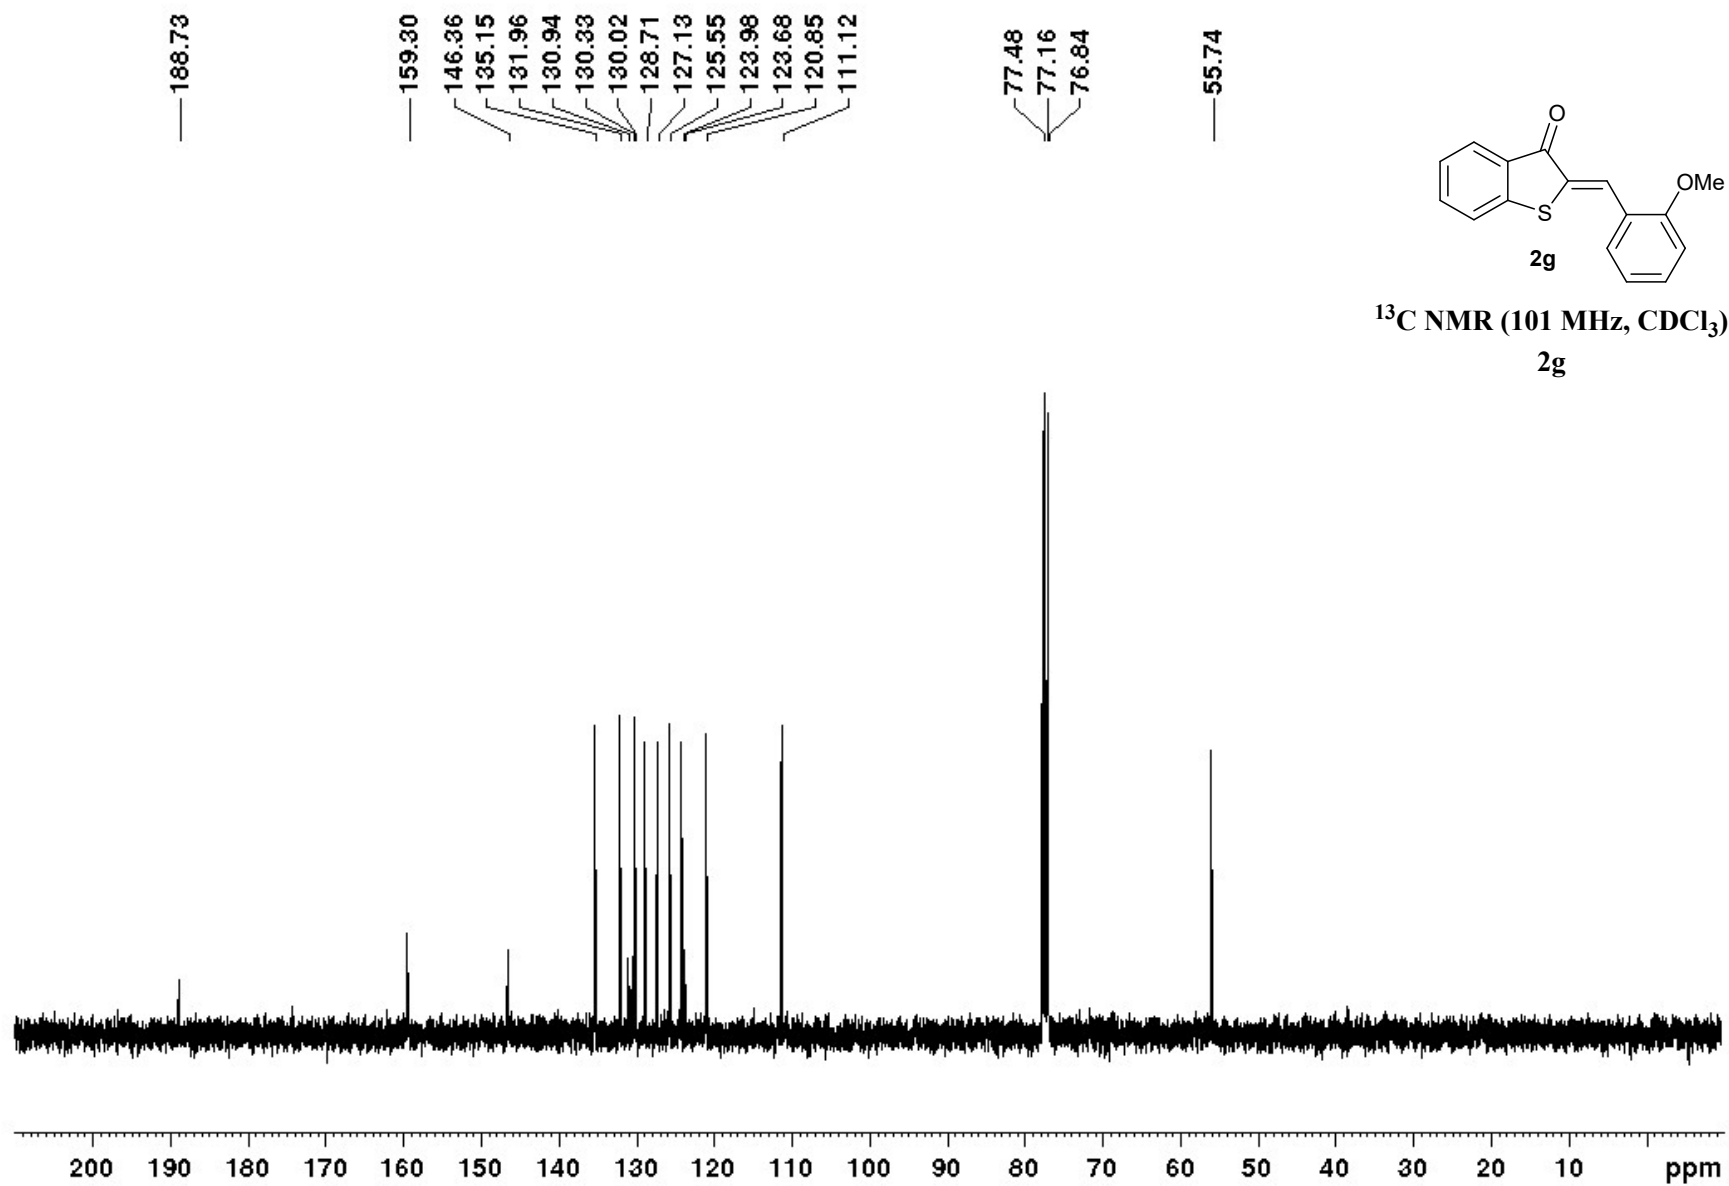

<sup>1</sup>H NMR spectrum of compound 2h

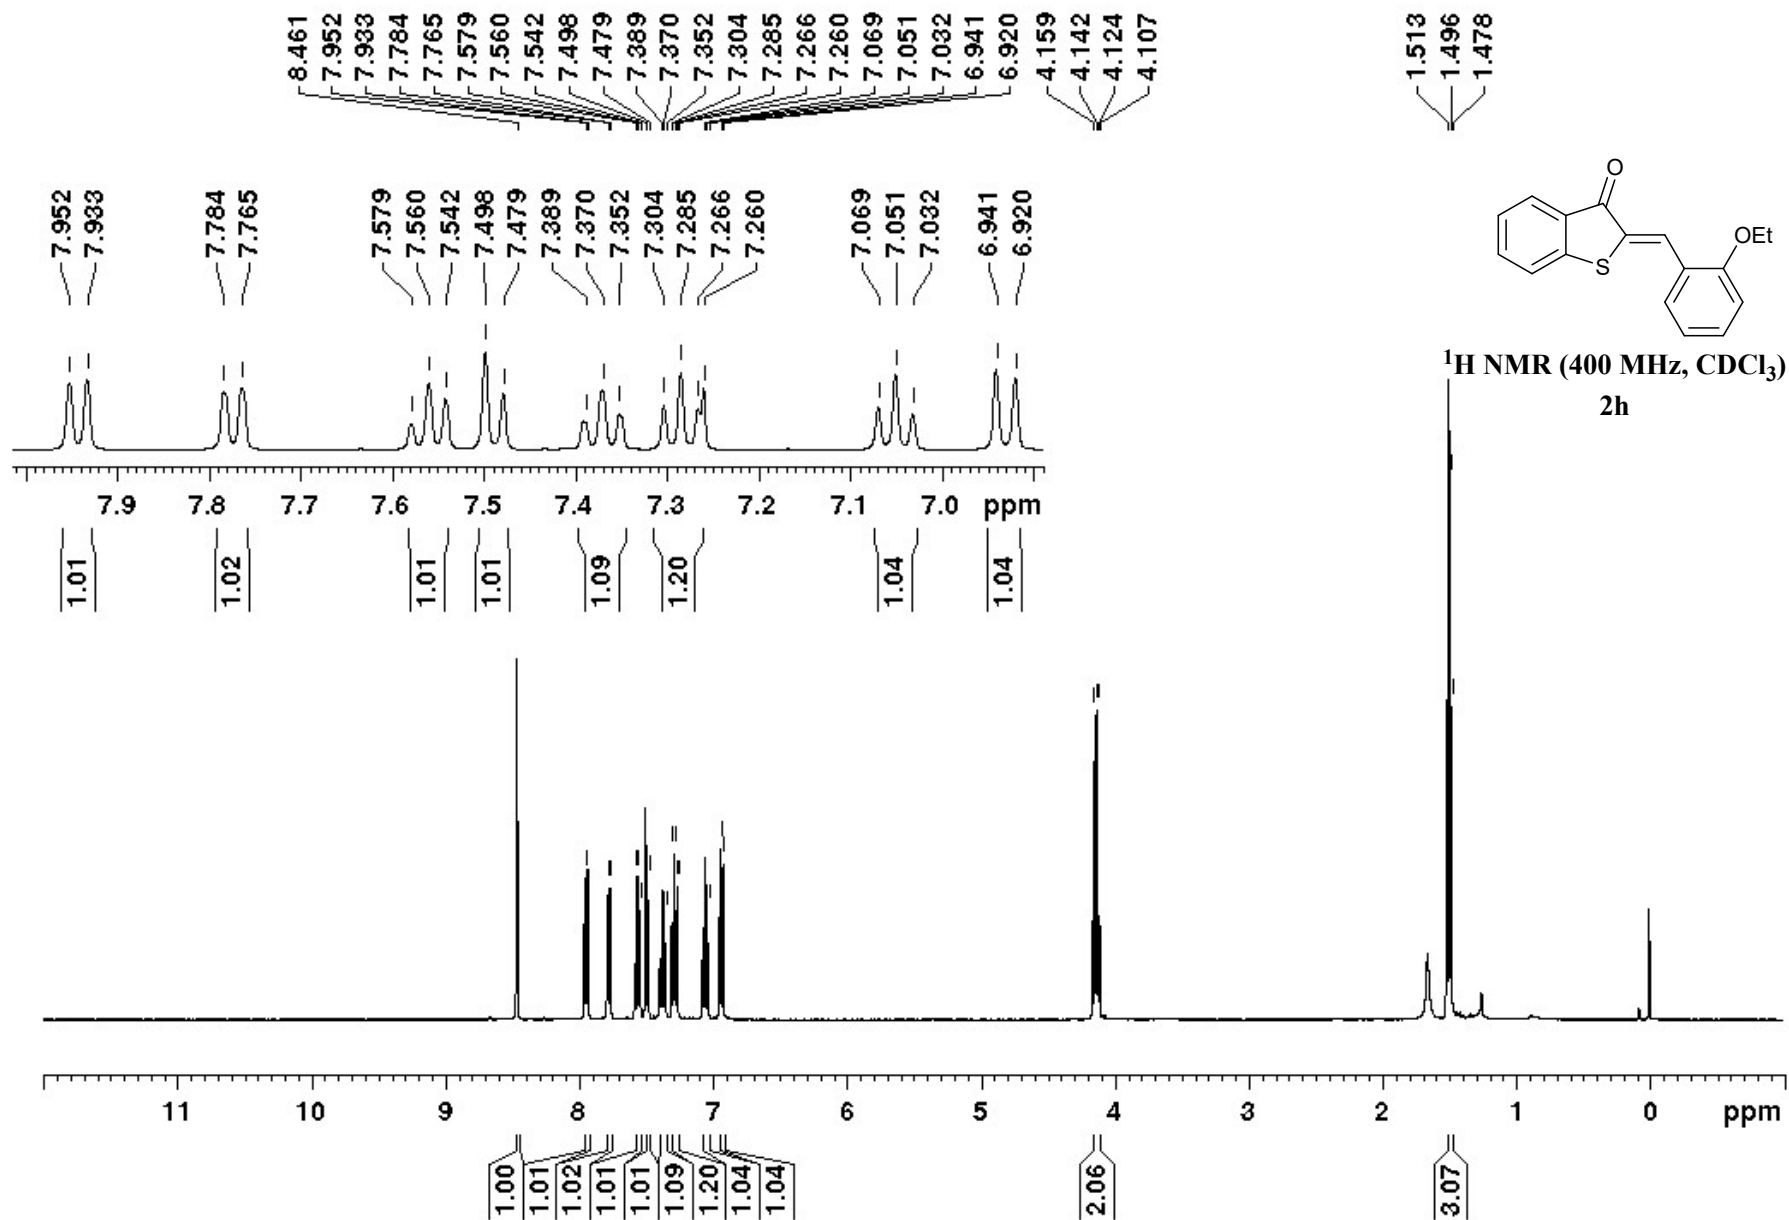

<sup>13</sup>C NMR spectrum of compound 2h

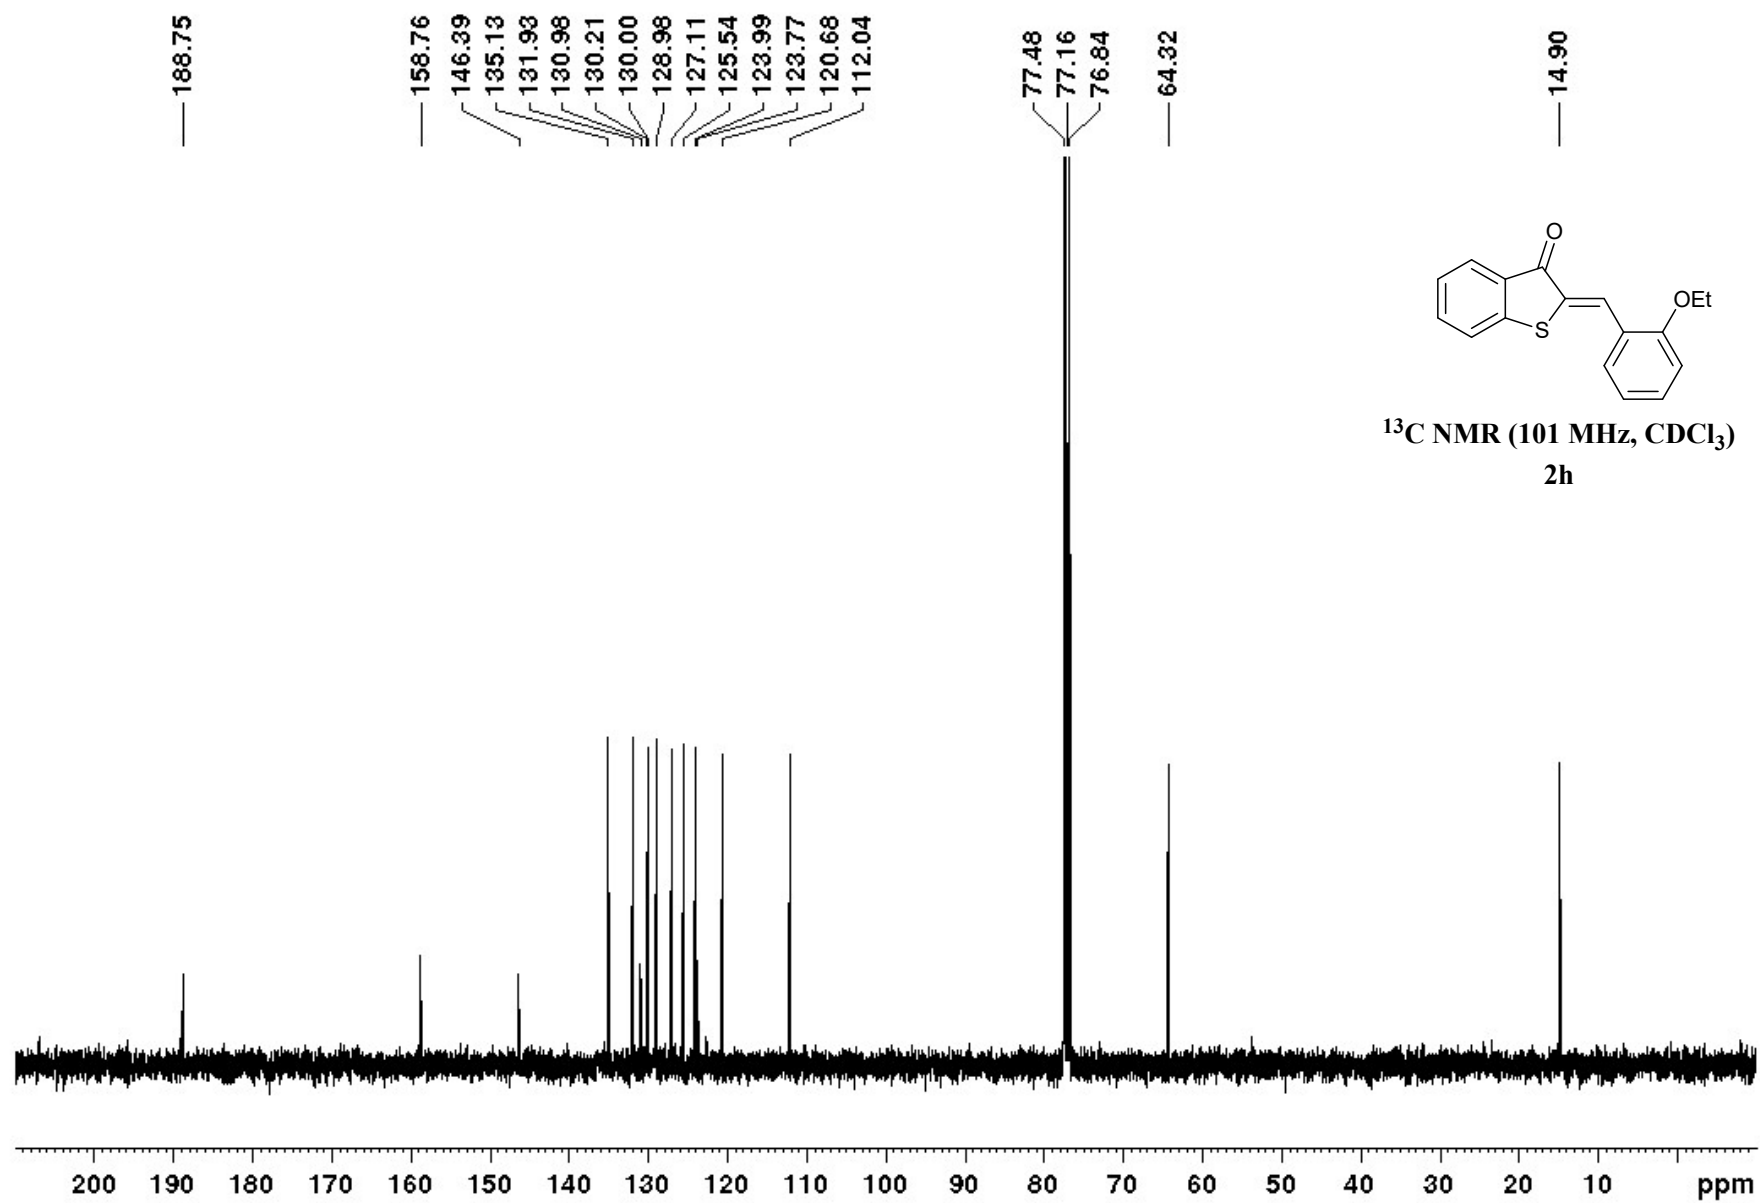



<sup>1</sup>H NMR spectrum of compound 2i

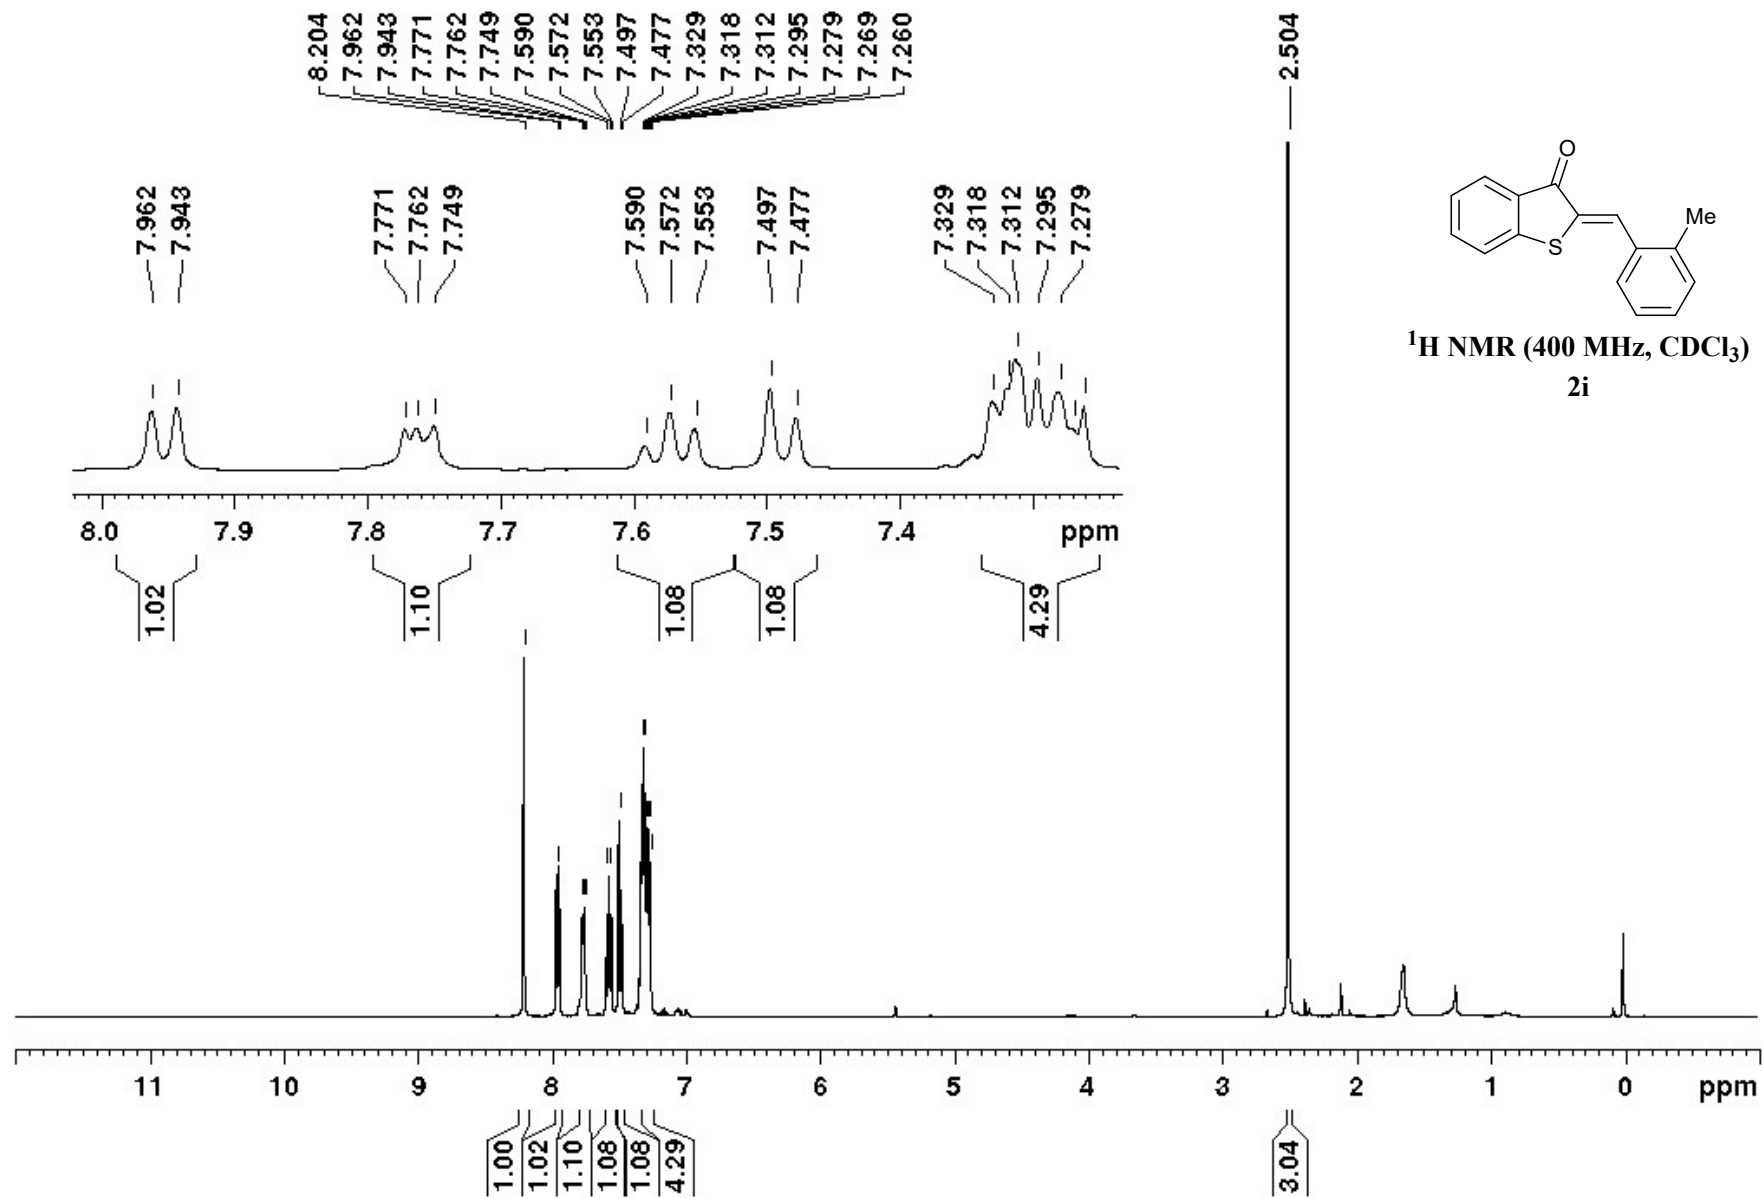

<sup>13</sup>C NMR spectrum of compound 2i

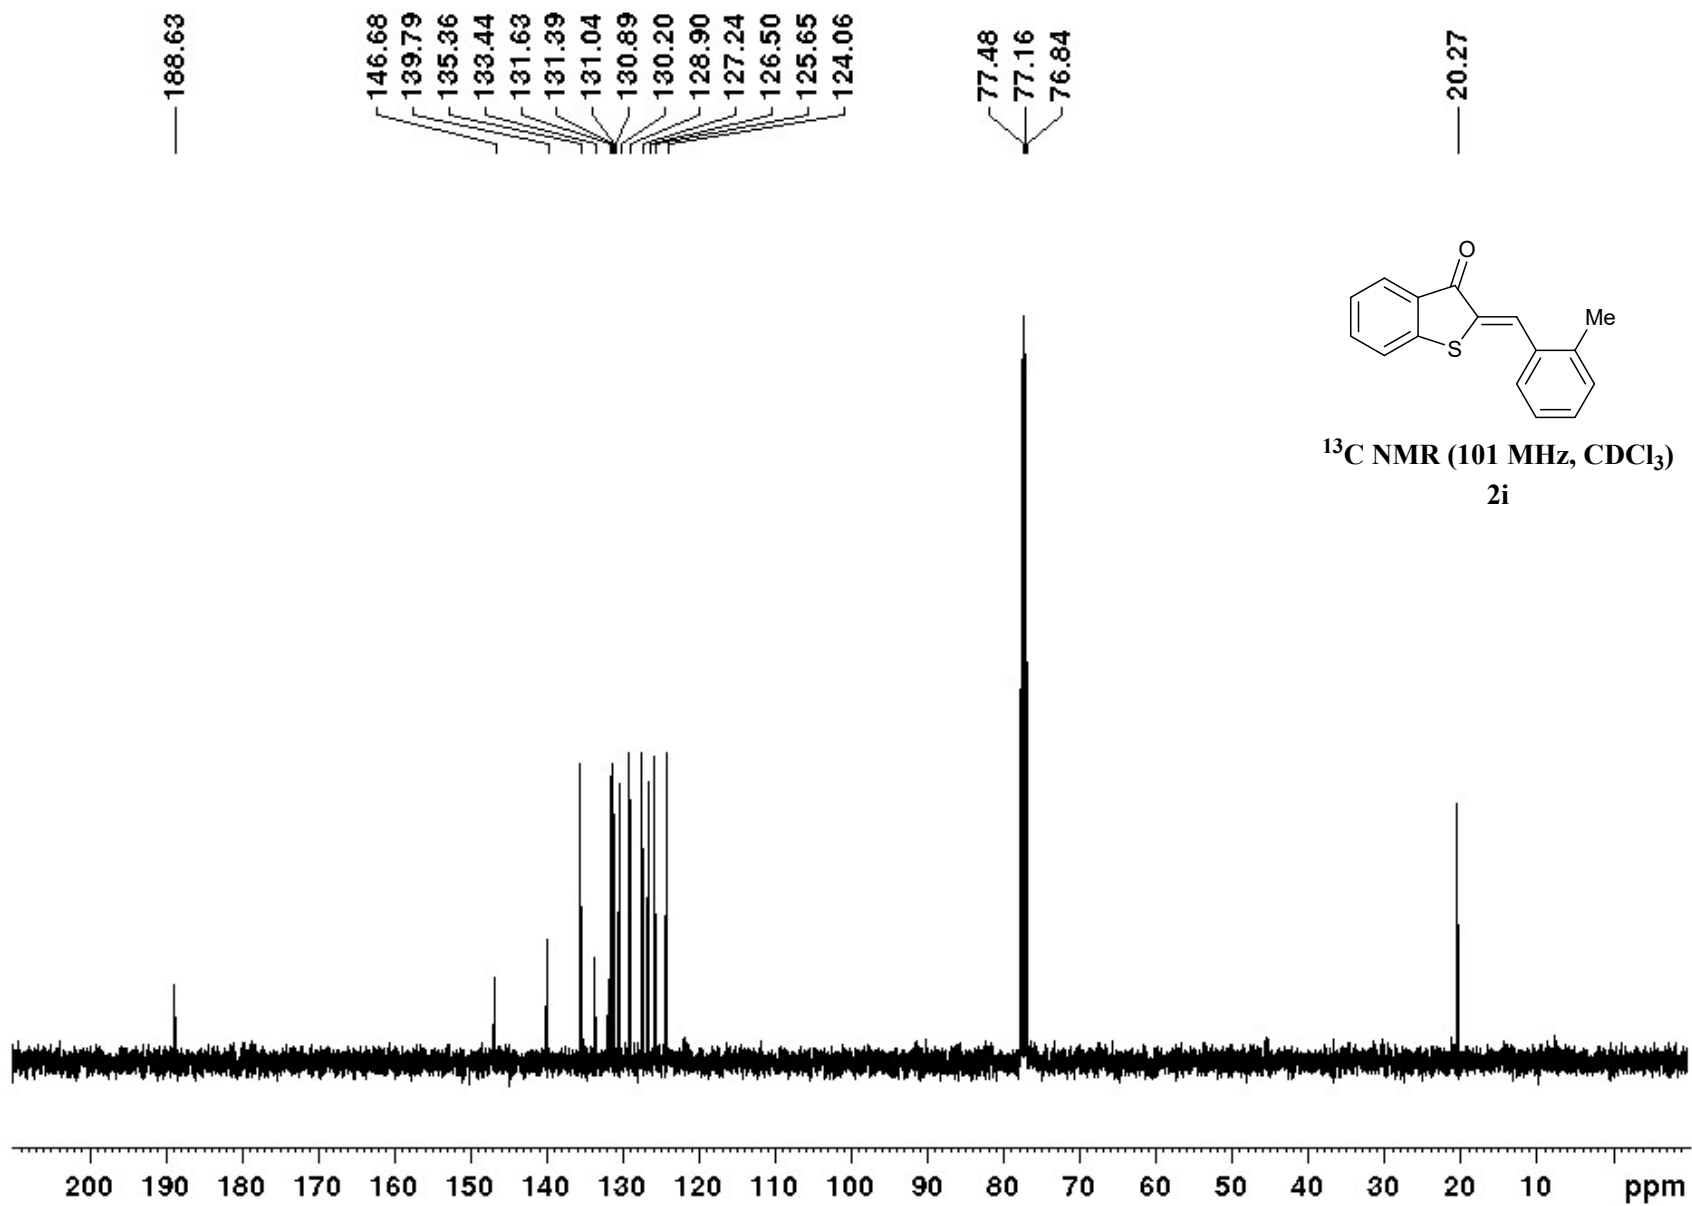

<sup>1</sup>H NMR spectrum of compound 2j

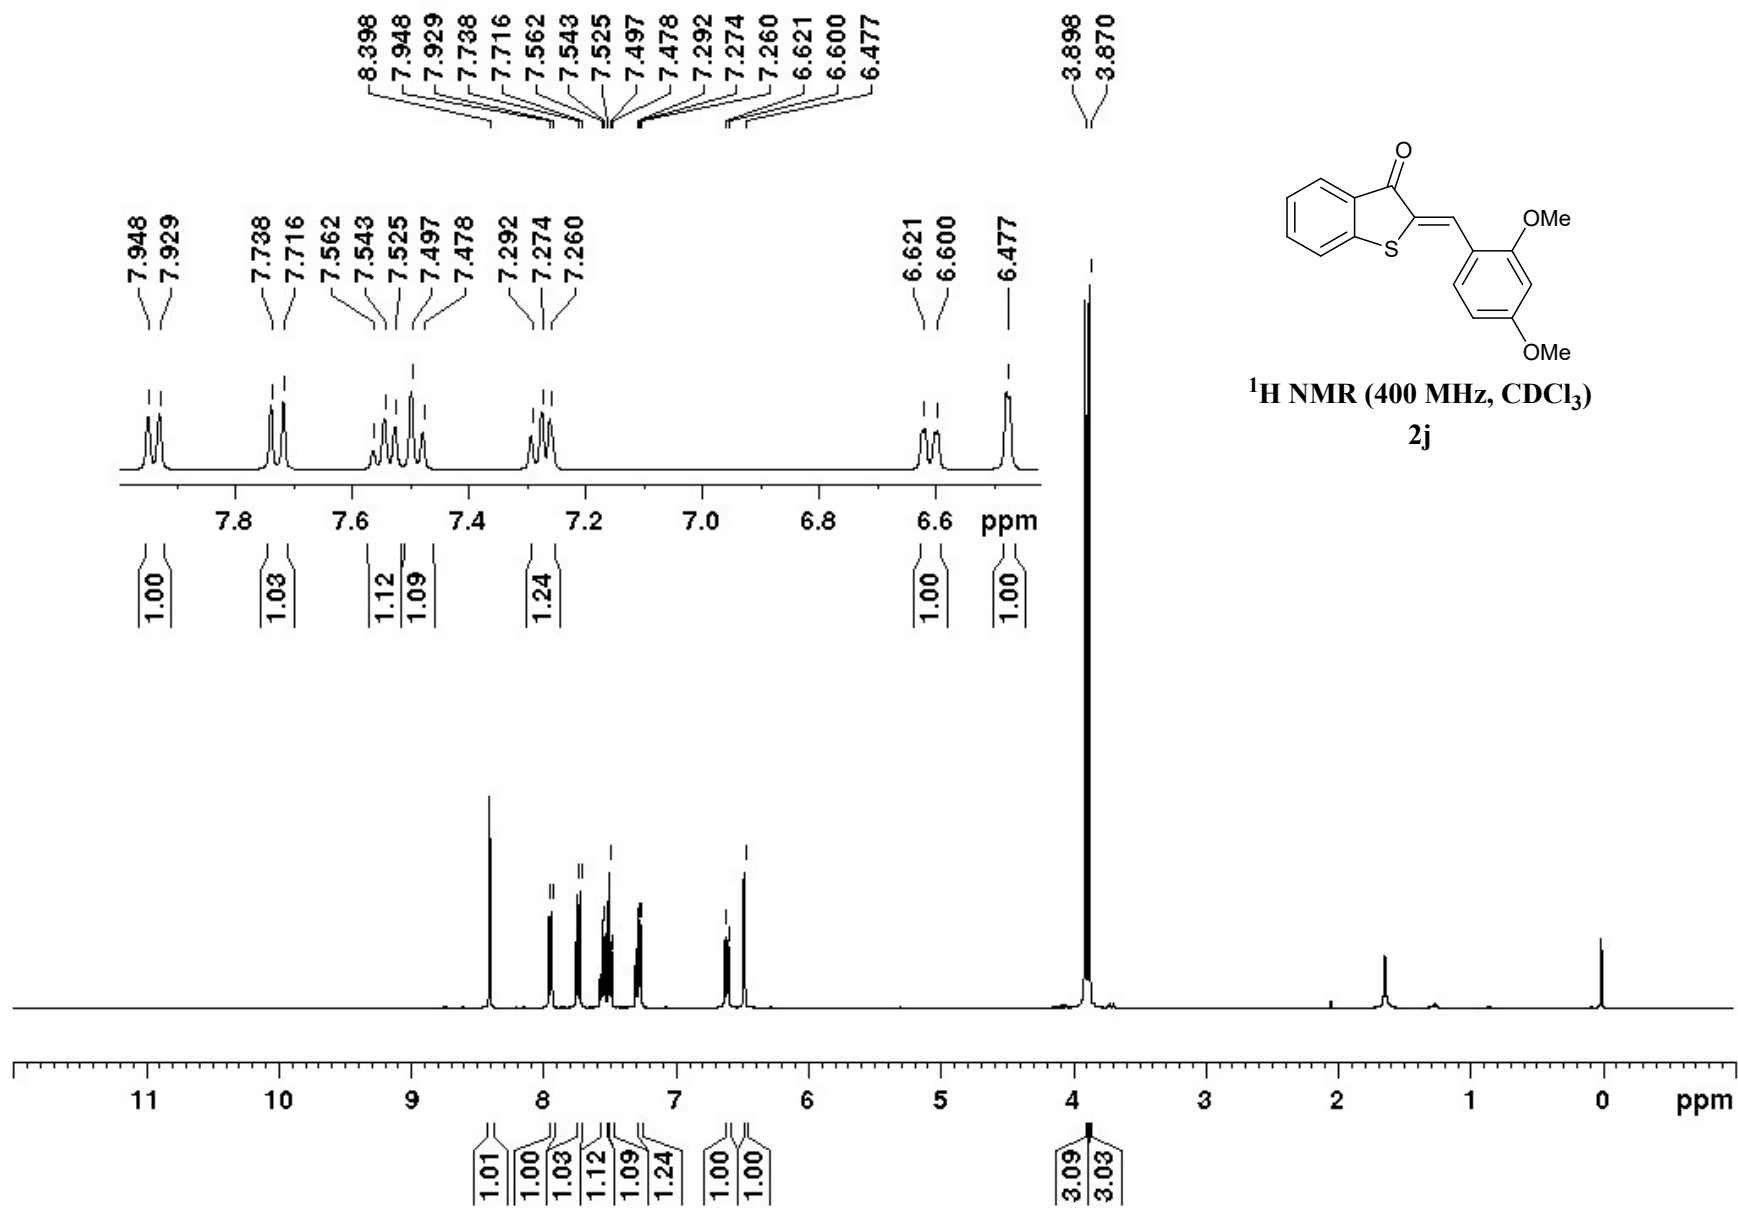

<sup>13</sup>C NMR spectrum of compound 2j

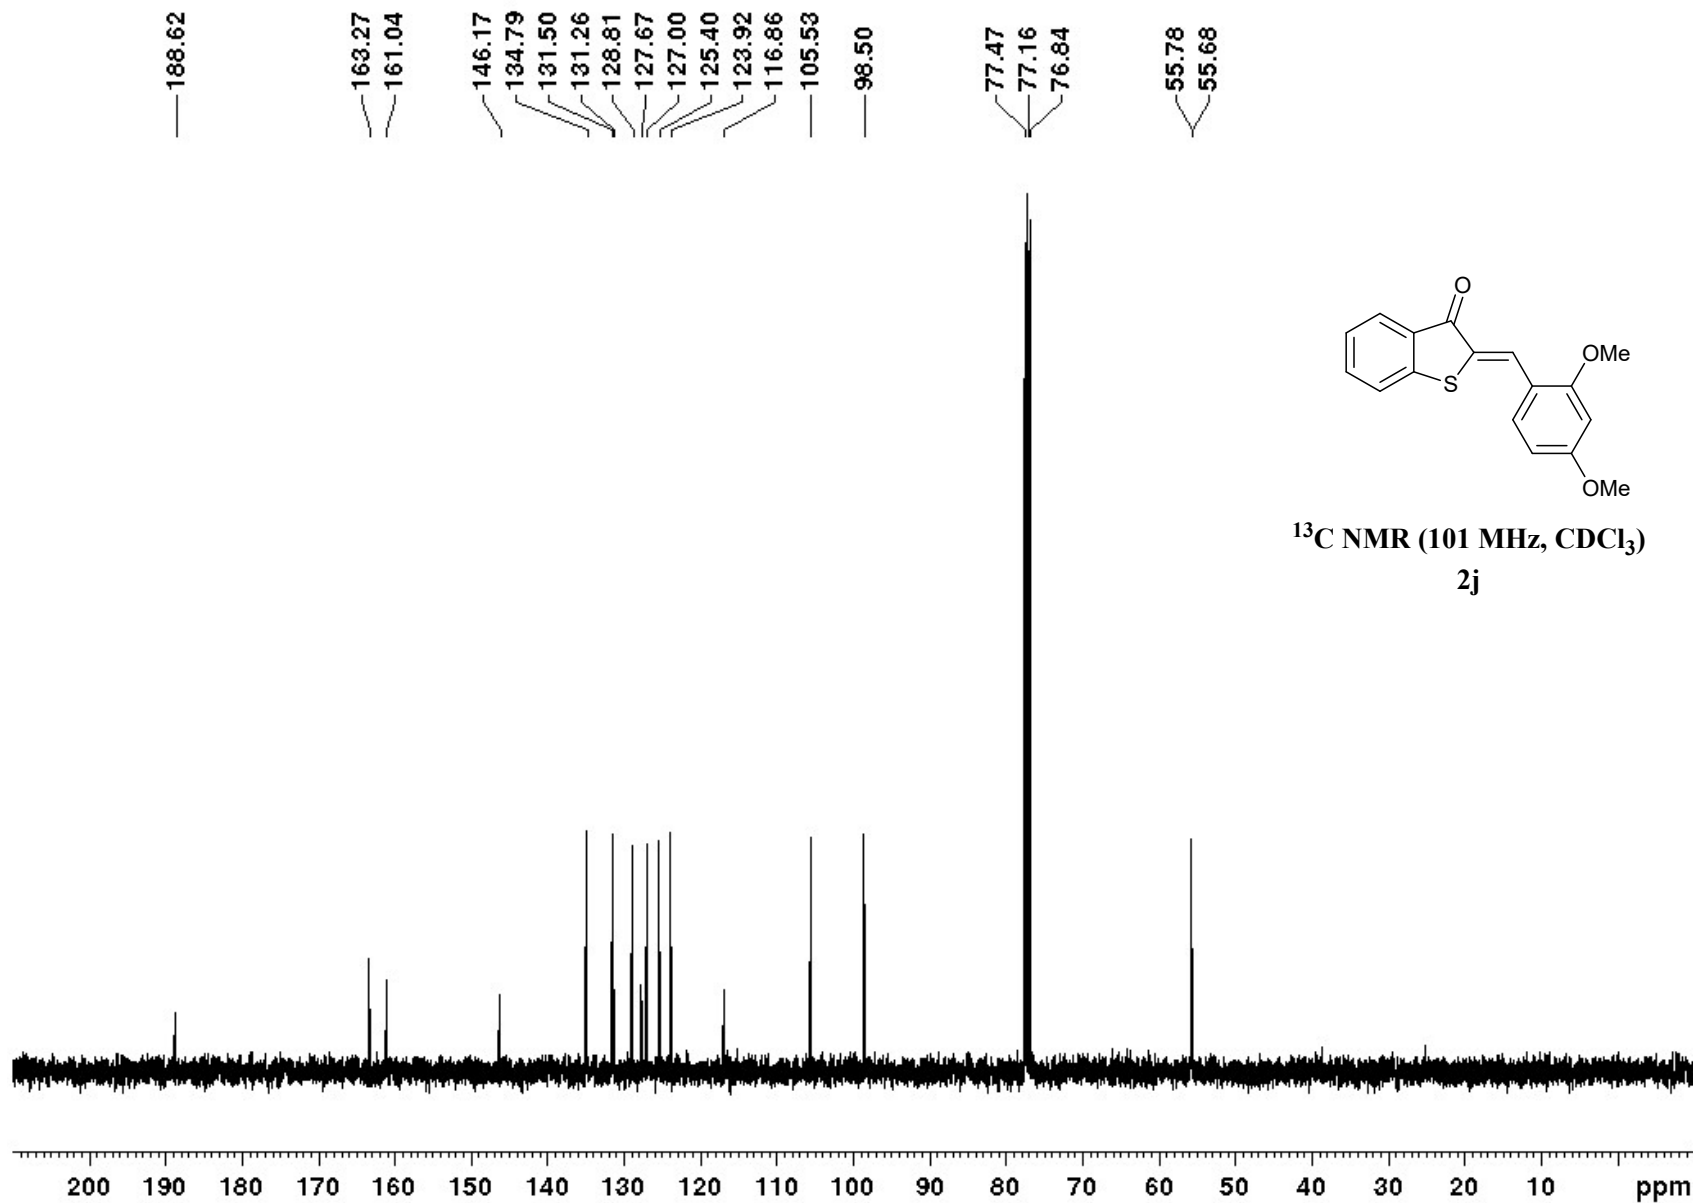

<sup>1</sup>H NMR spectrum of compound 2k

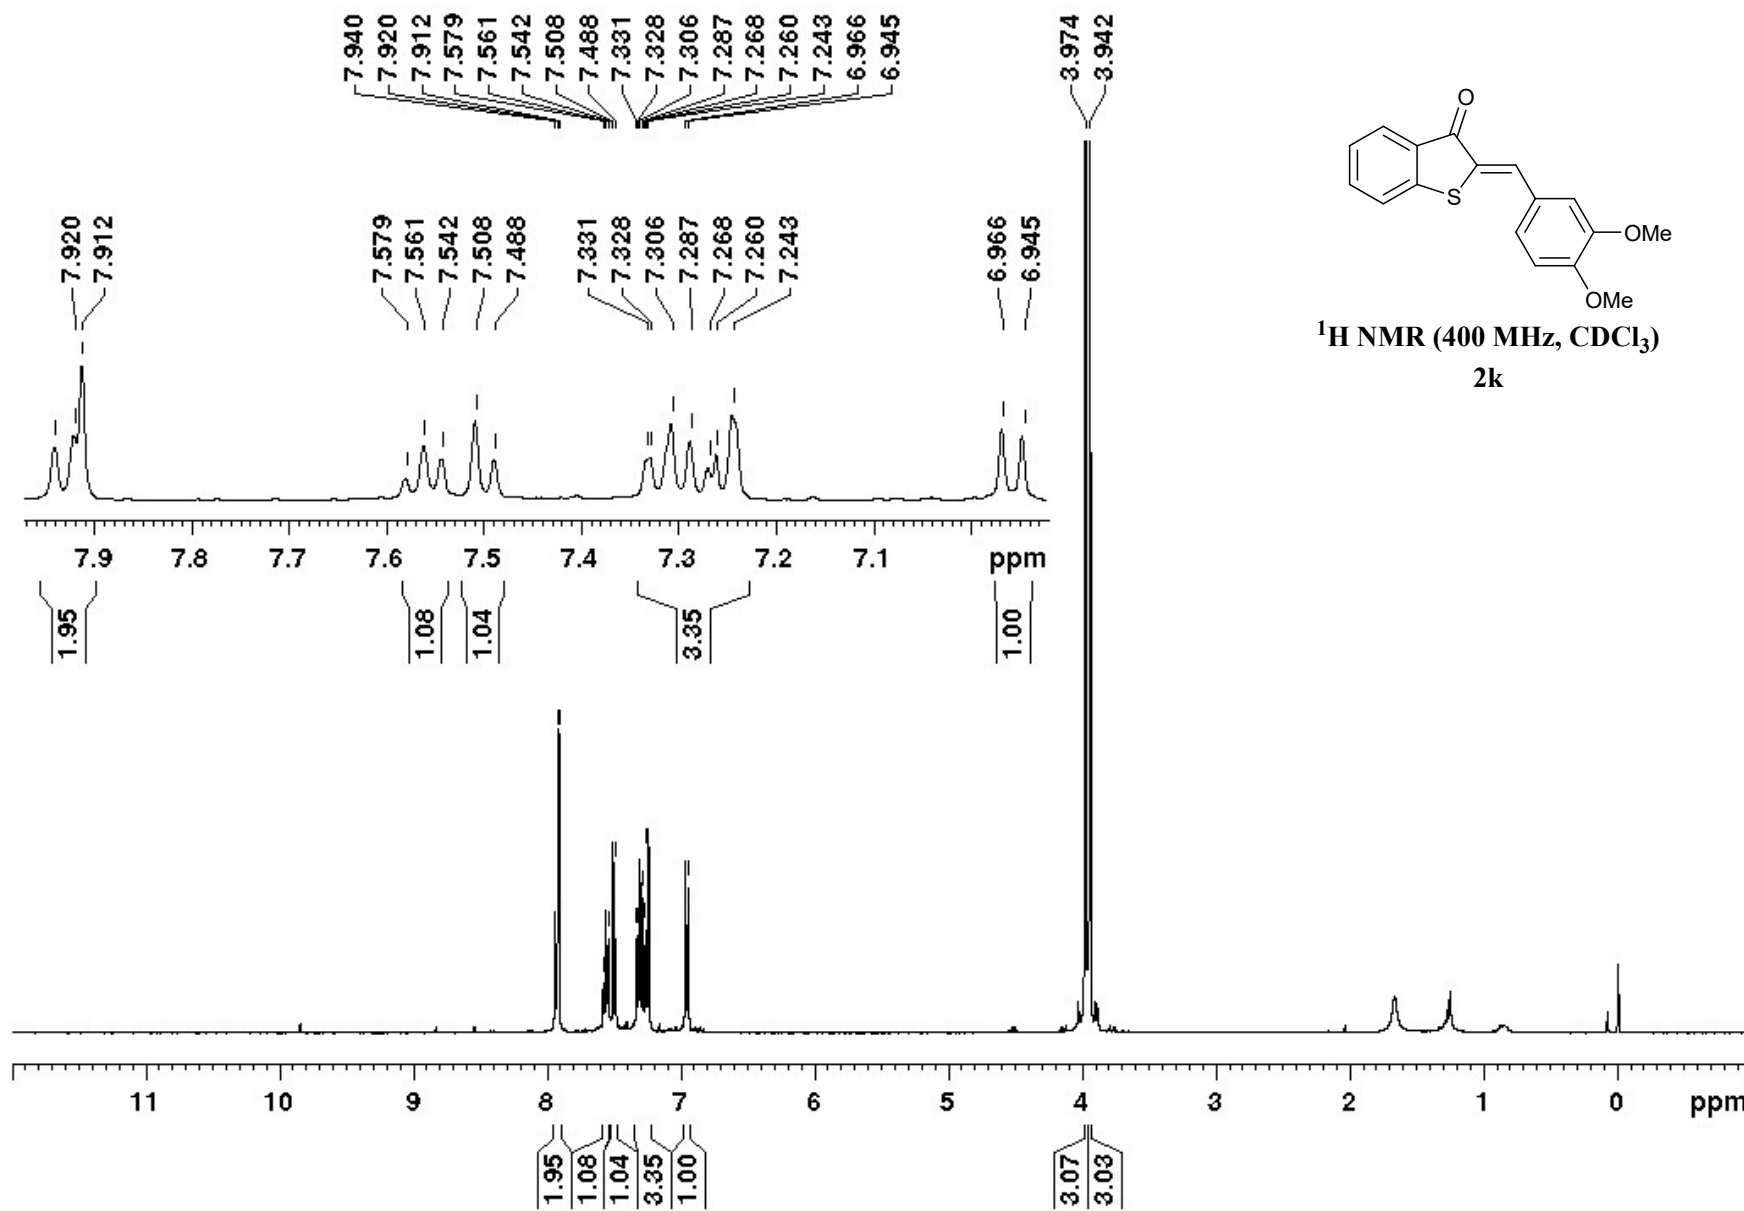

<sup>13</sup>C NMR spectrum of compound 2k

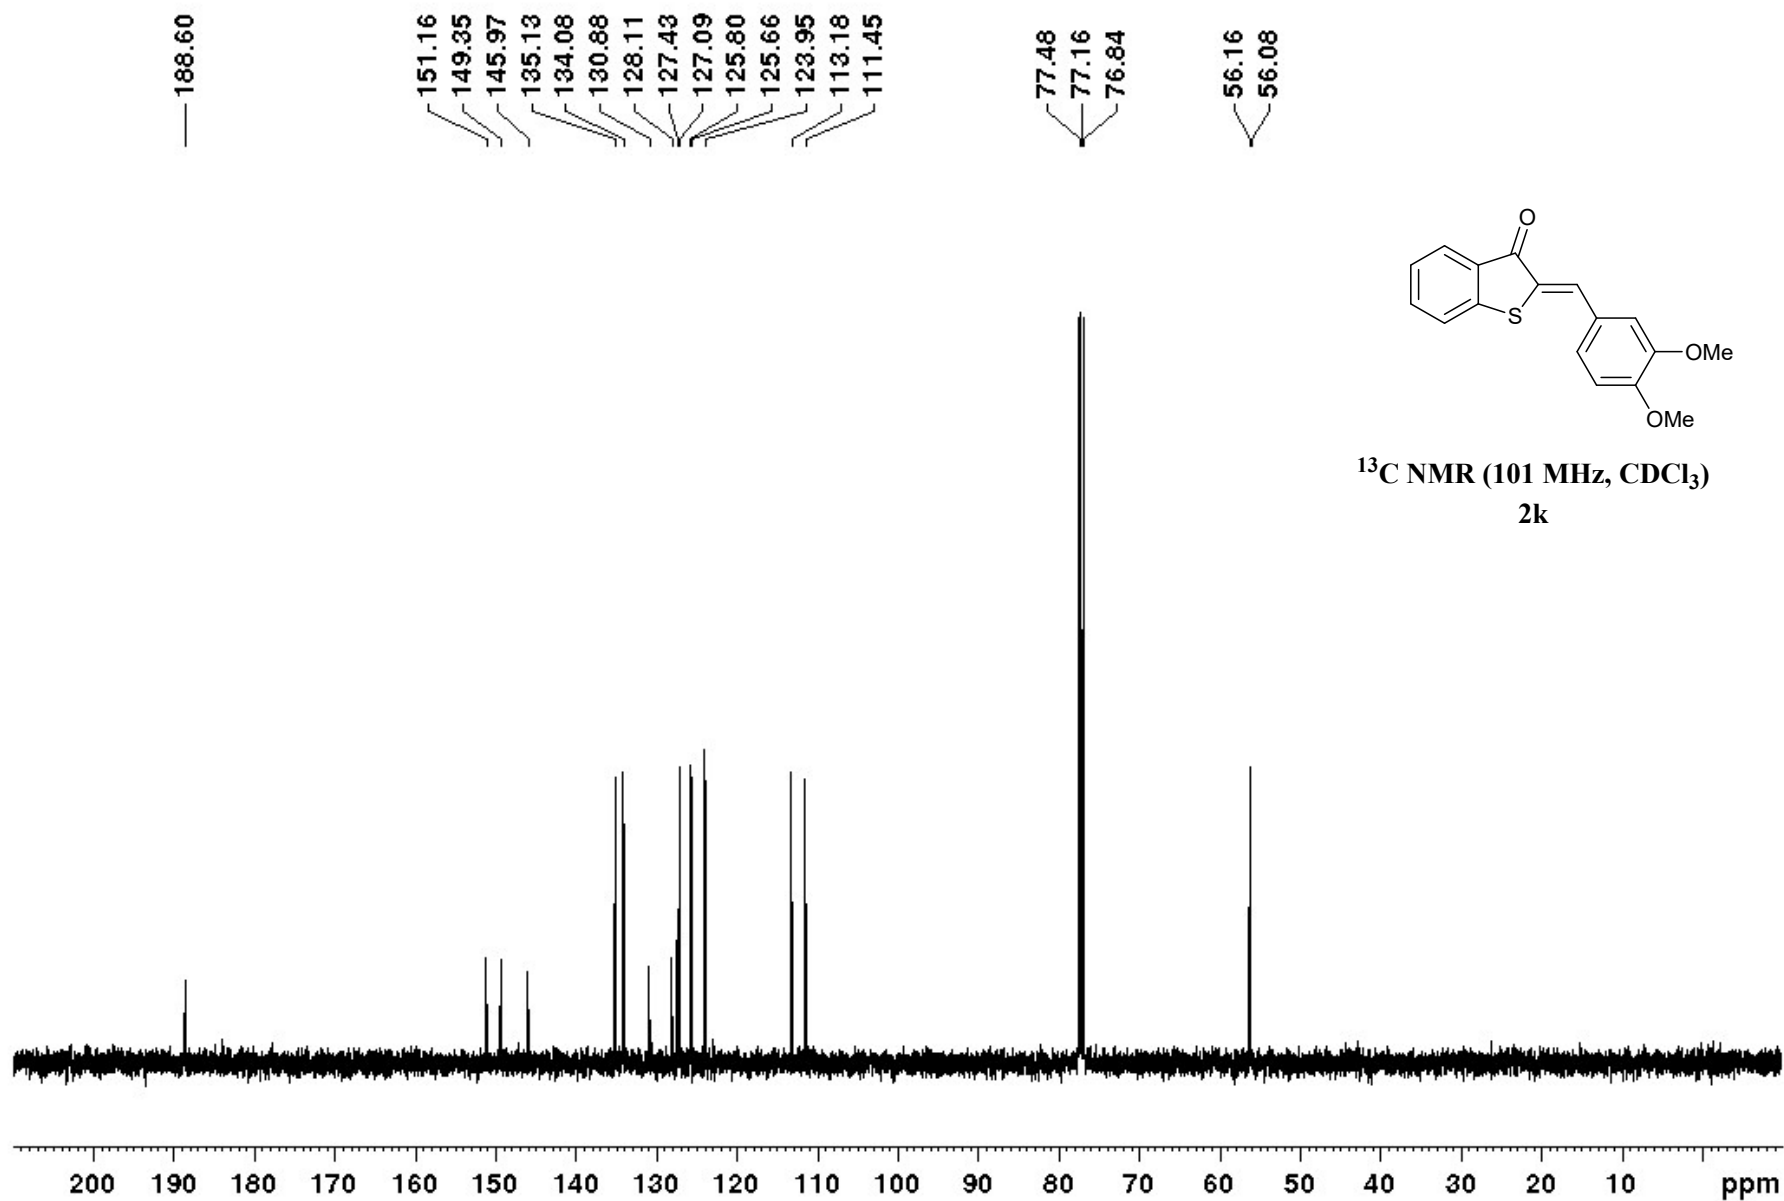

<sup>1</sup>H NMR spectrum of compound 21

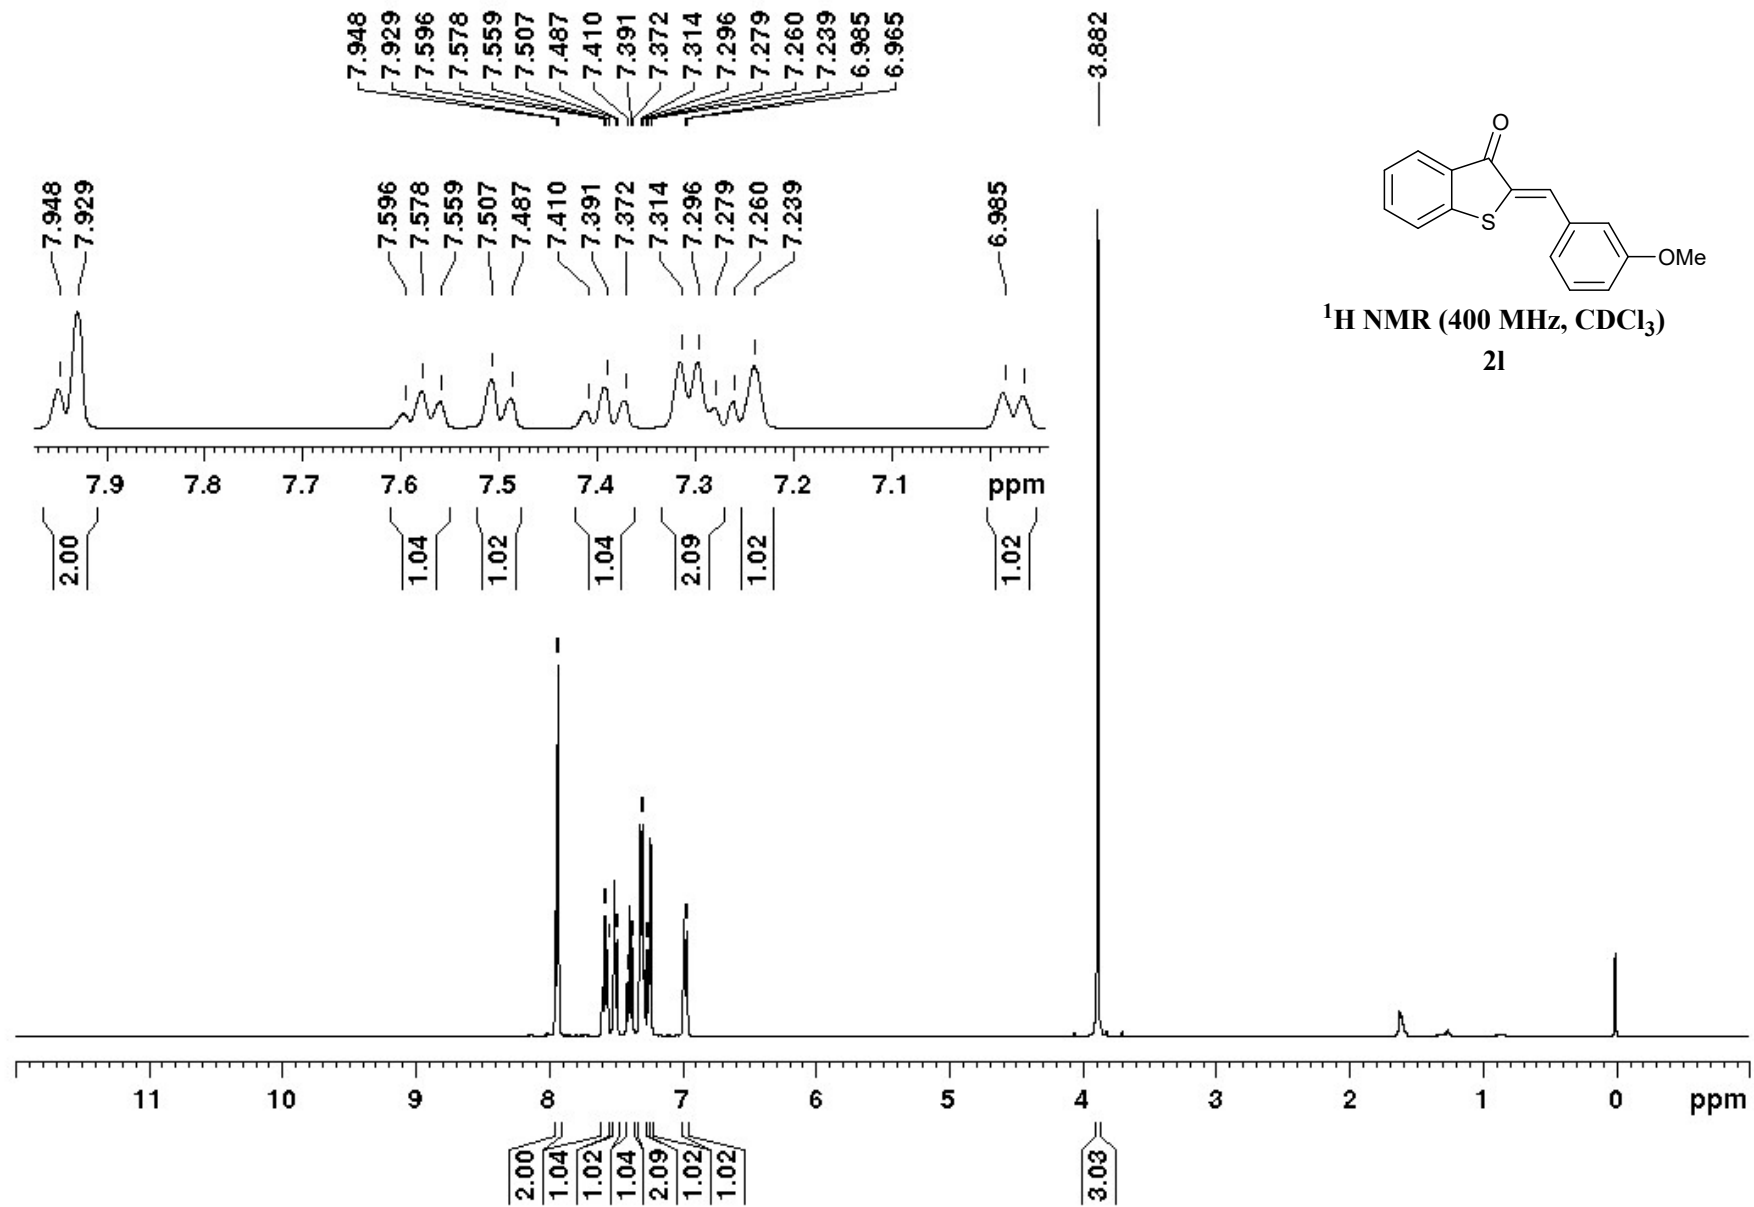

<sup>13</sup>C NMR spectrum of compound 21

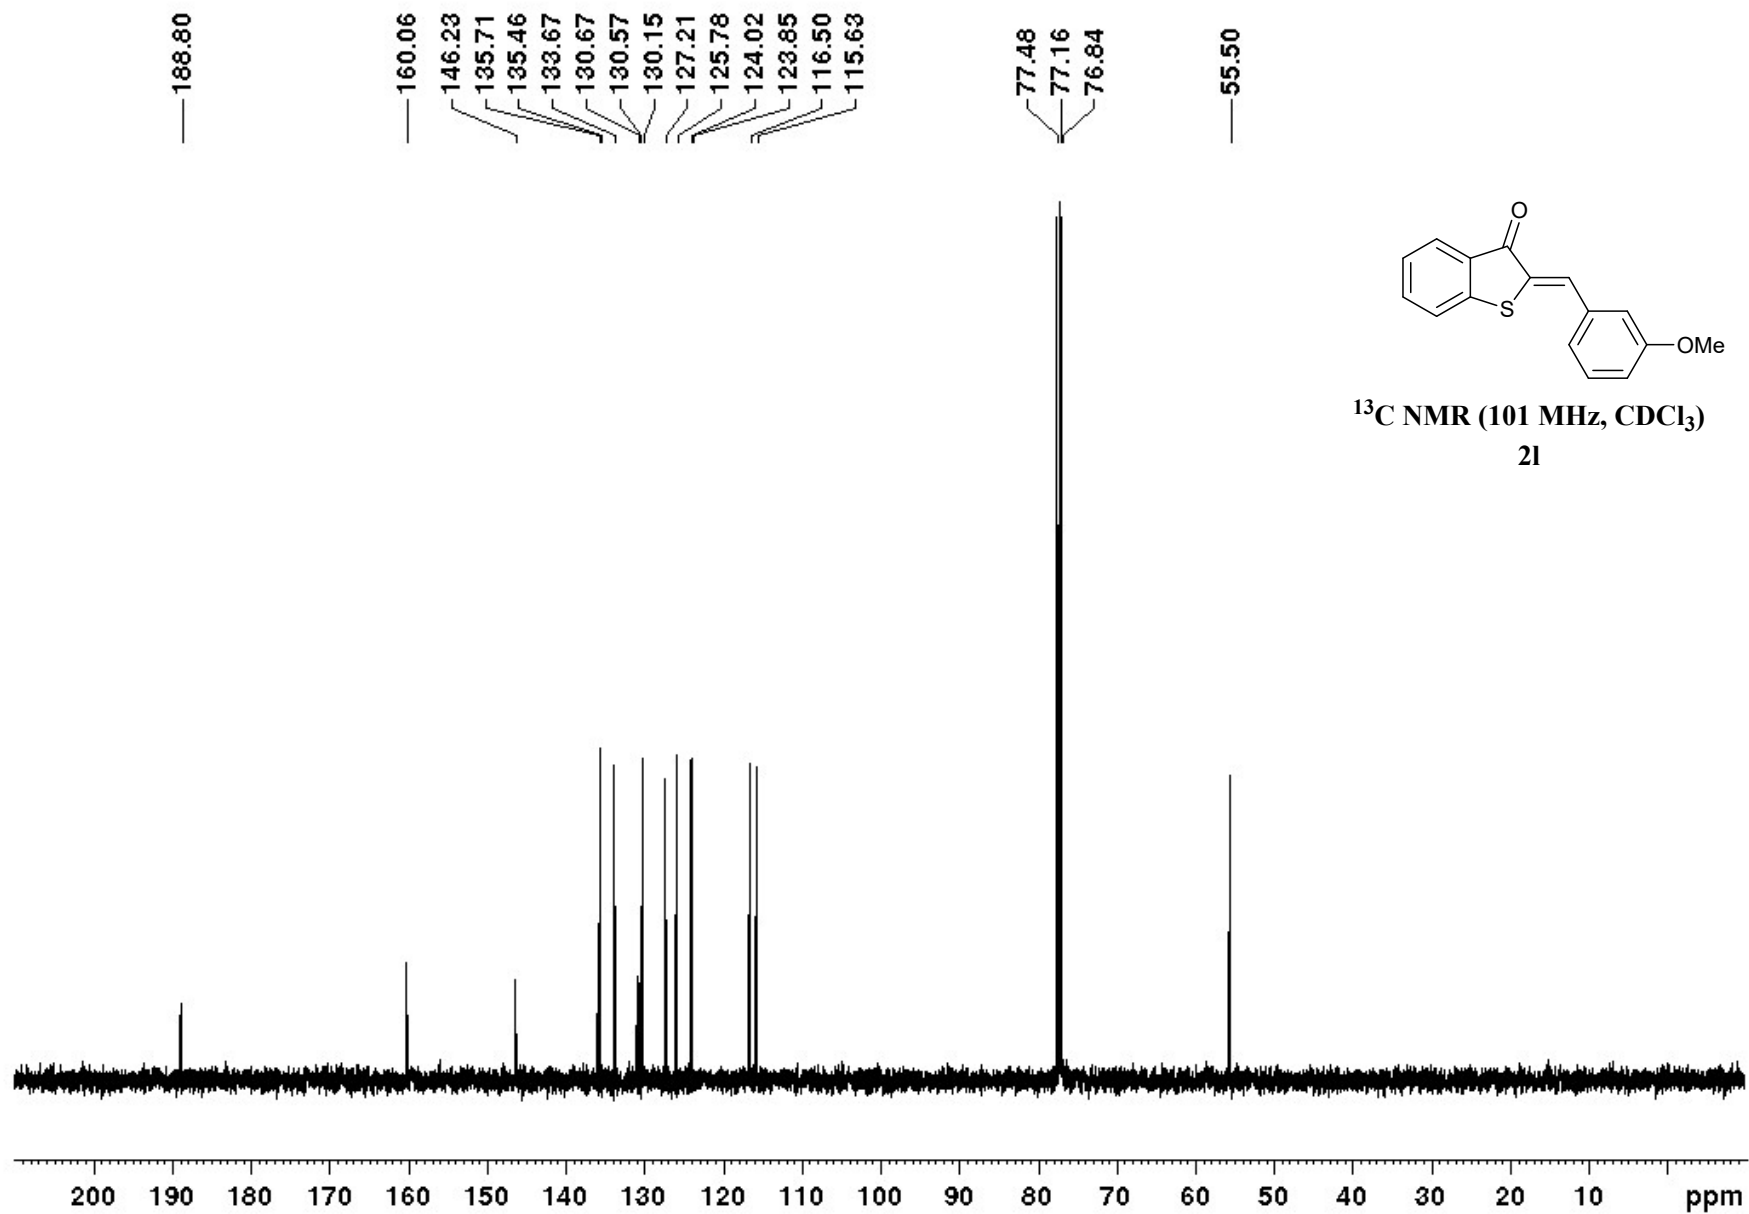

v



<sup>1</sup>H NMR spectrum of compound 2m

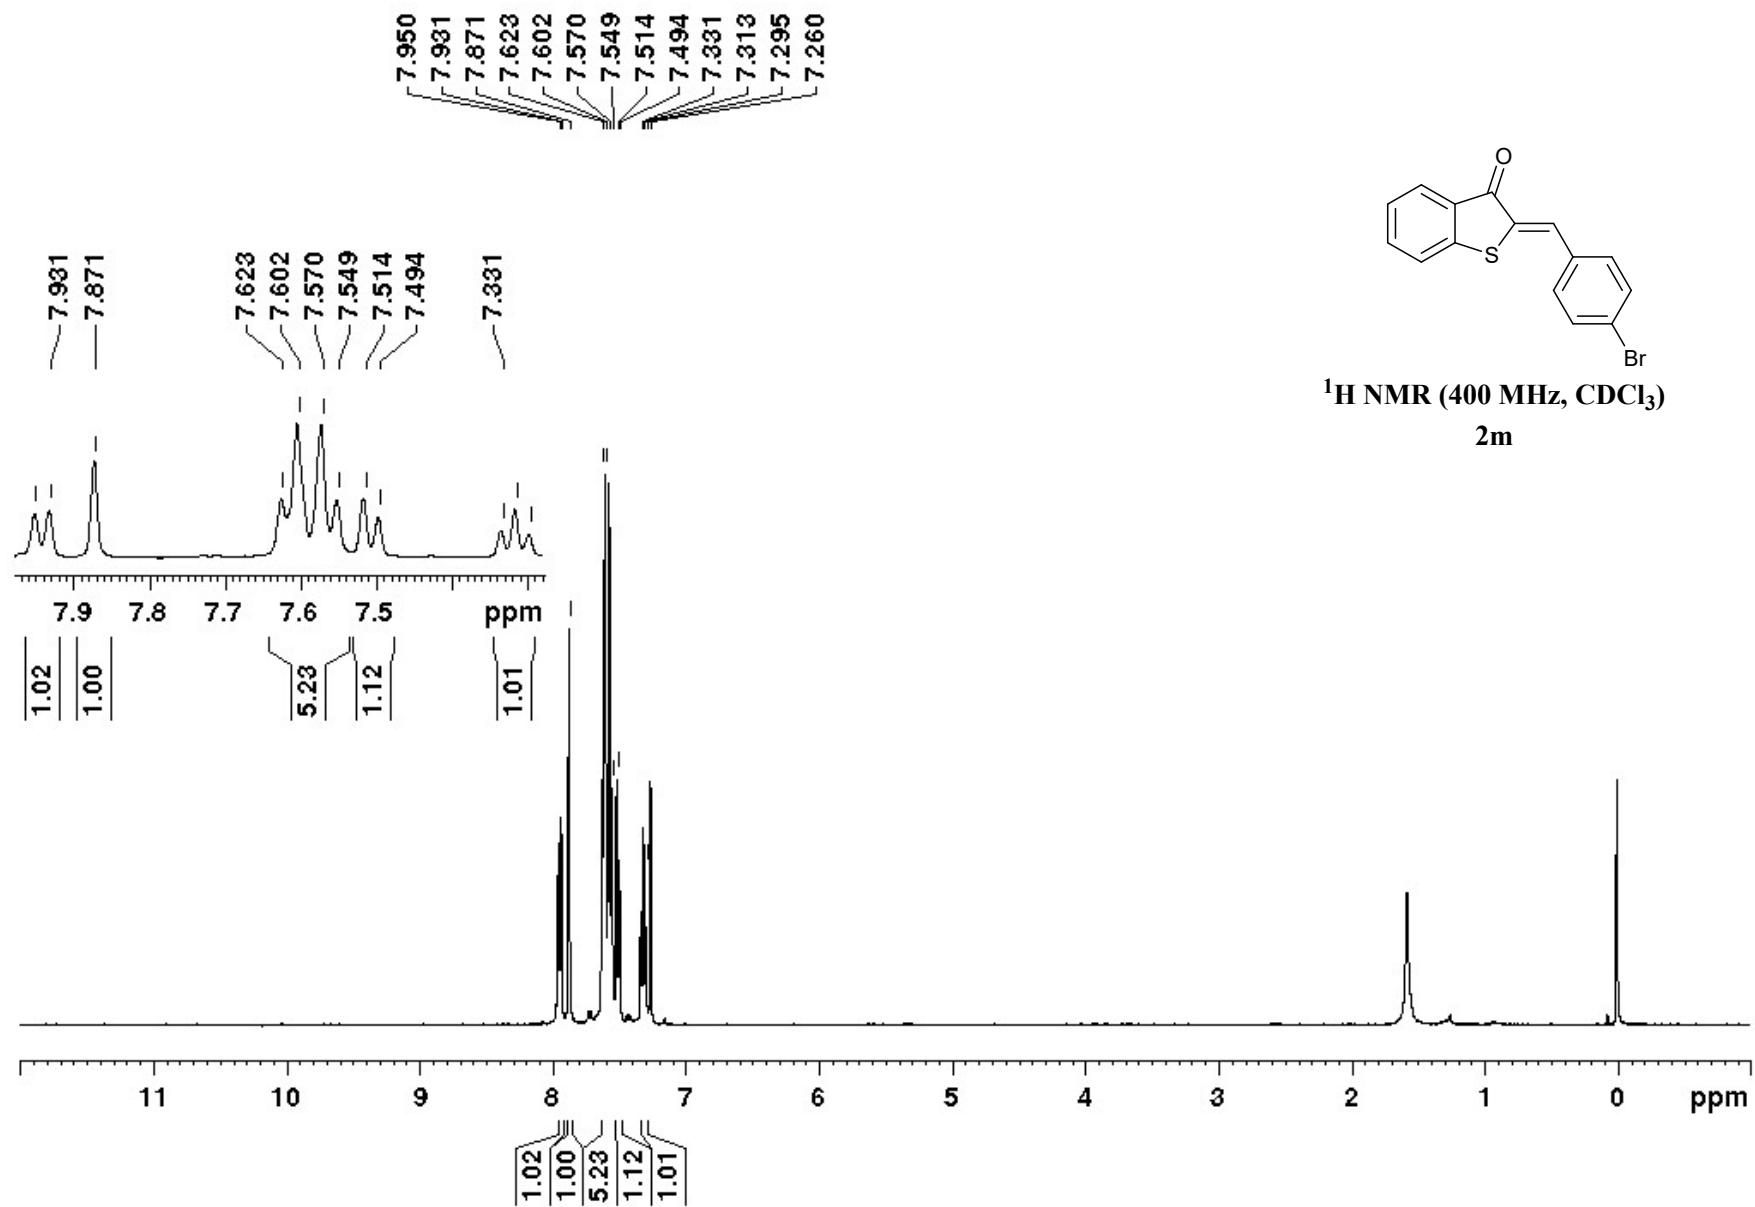

<sup>13</sup>C NMR spectrum of compound 2m

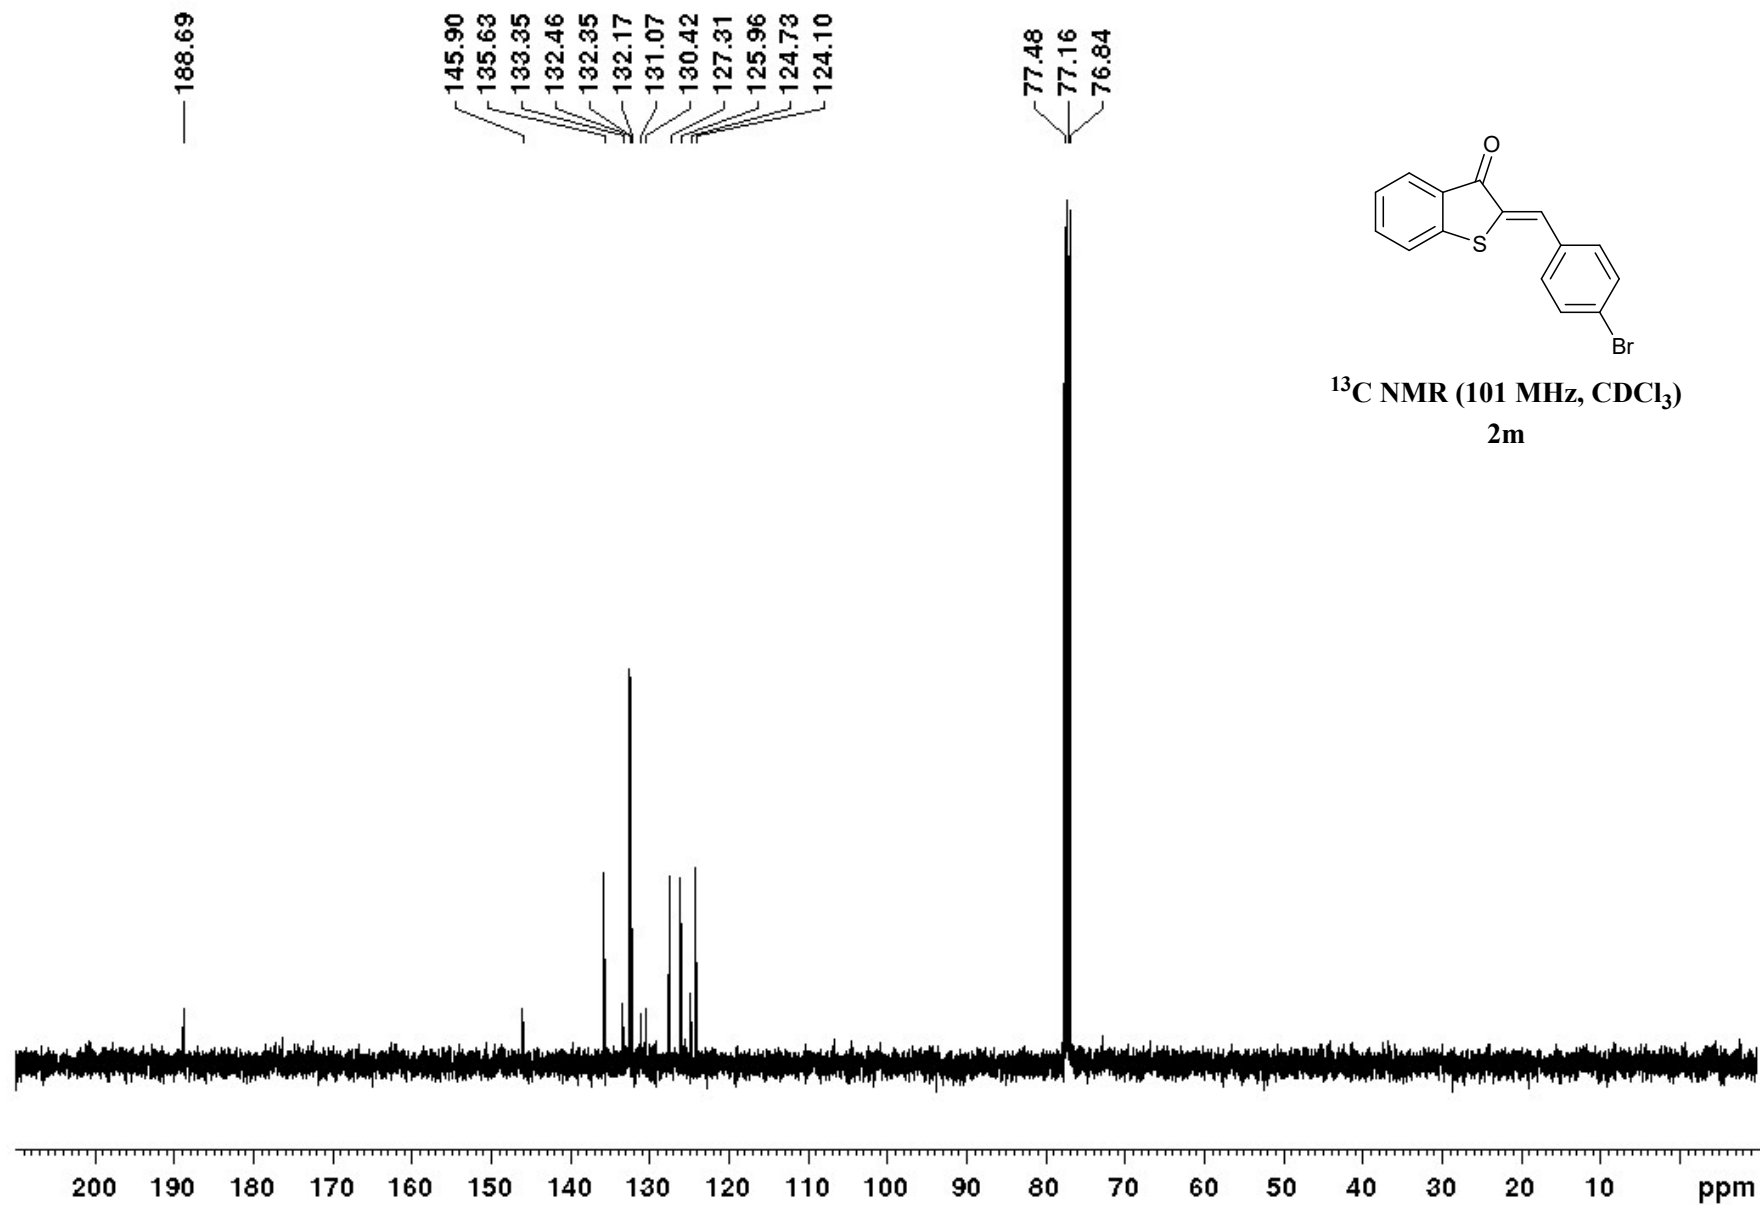

<sup>1</sup>H NMR spectrum of compound 2n

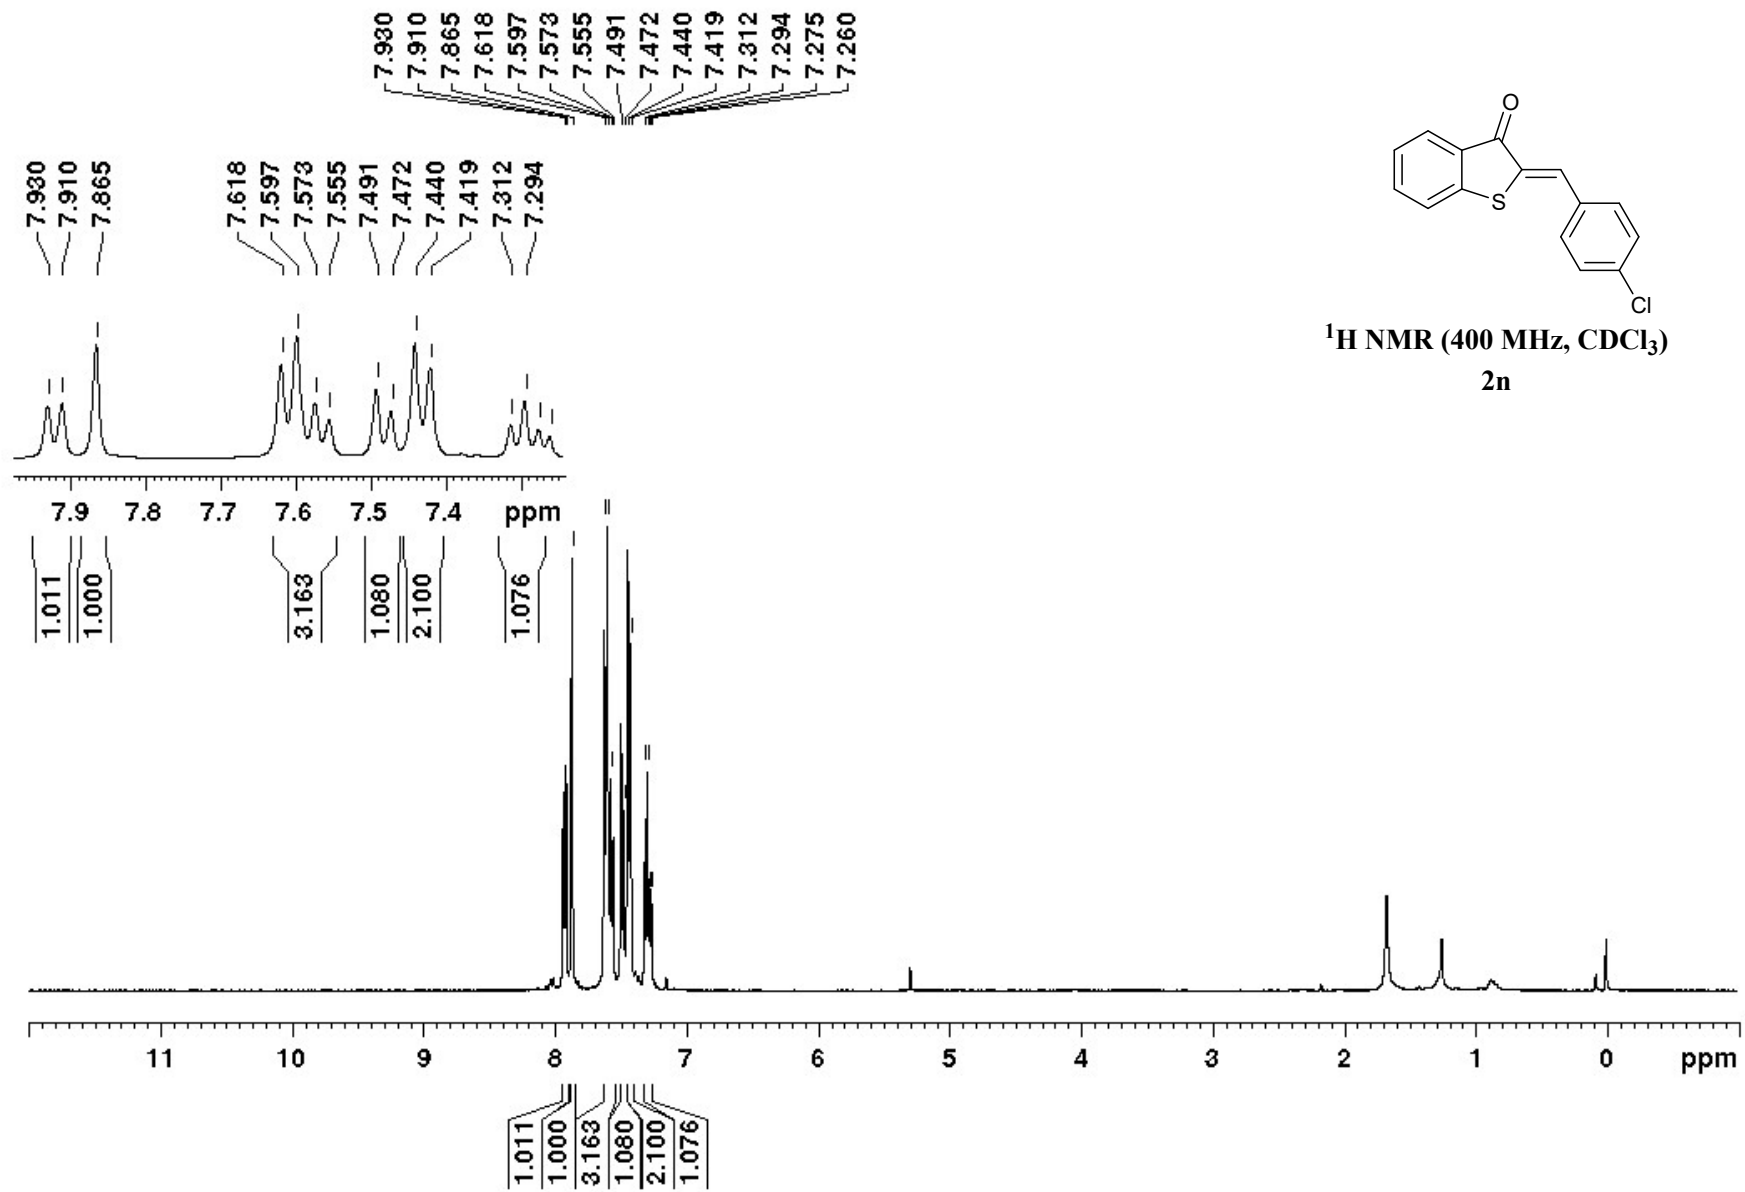

<sup>13</sup>C NMR spectrum of compound 2n

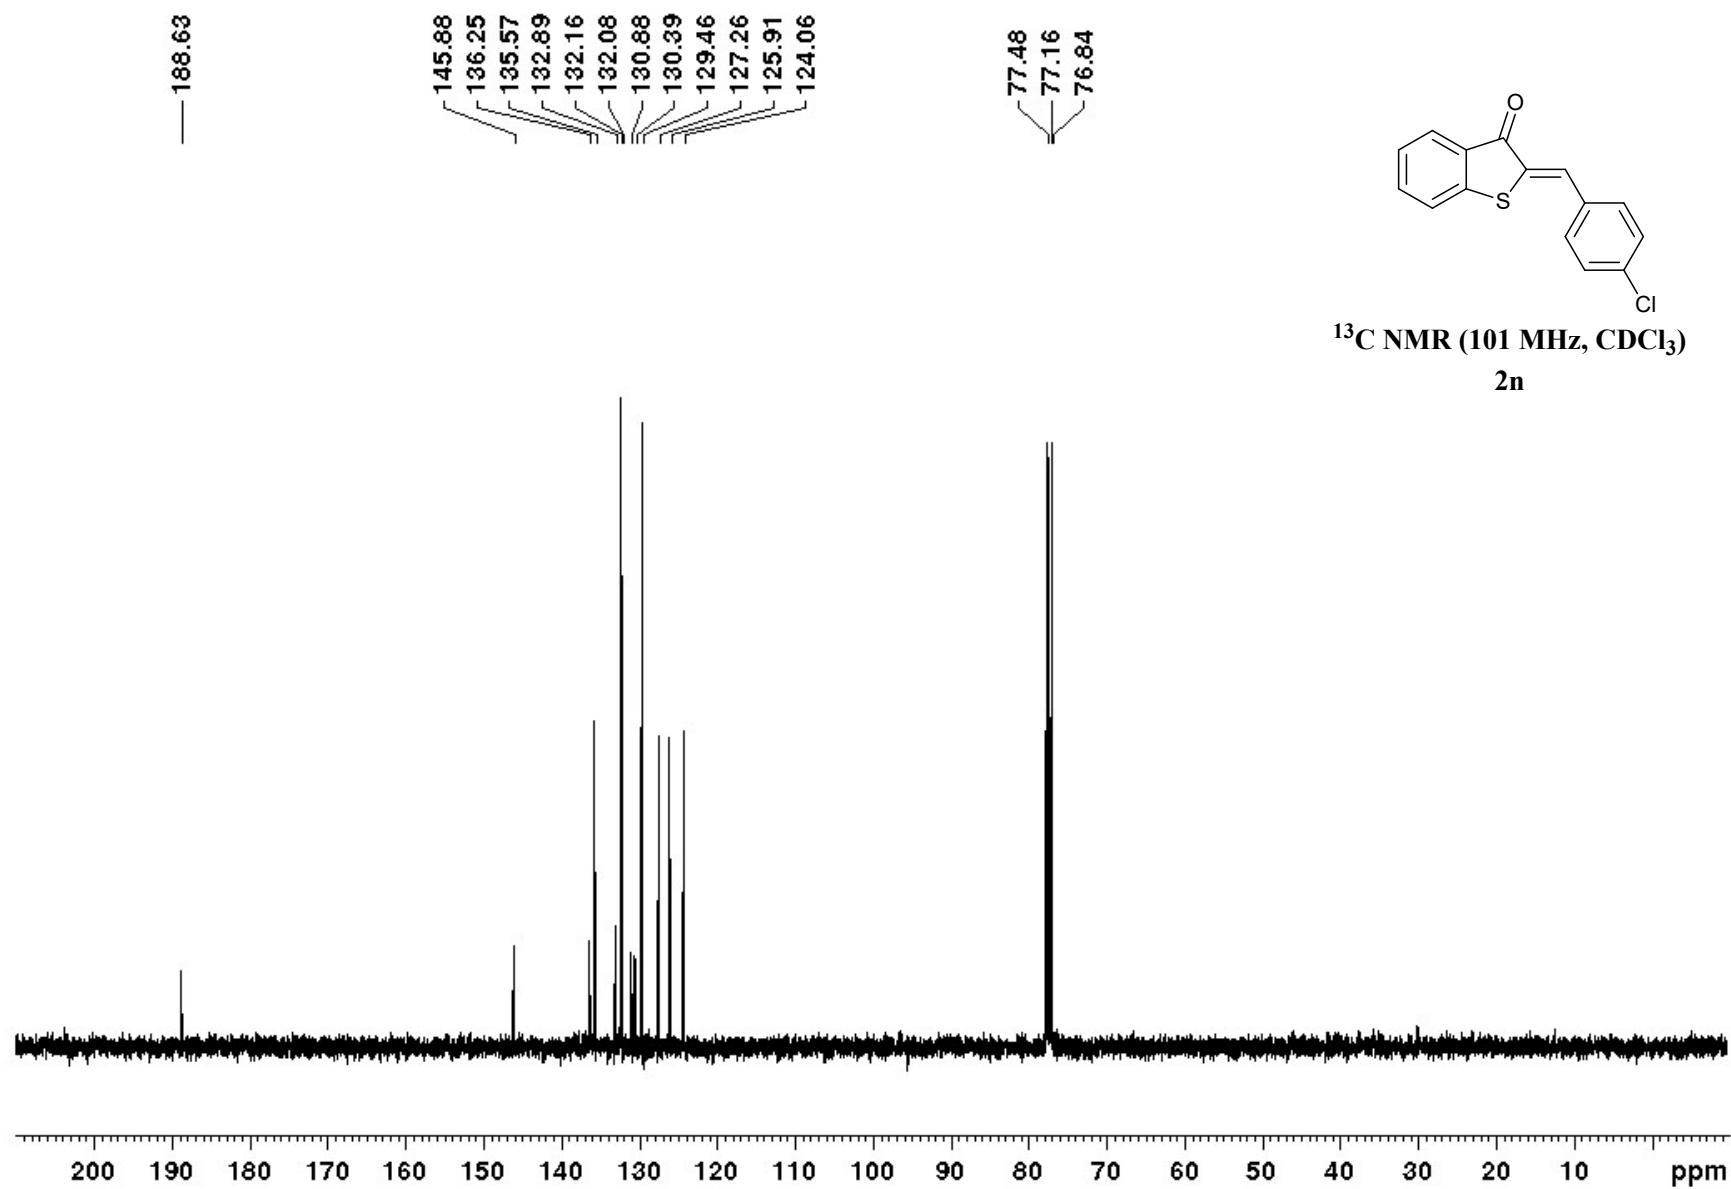

<sup>1</sup>H NMR spectrum of compound 2o

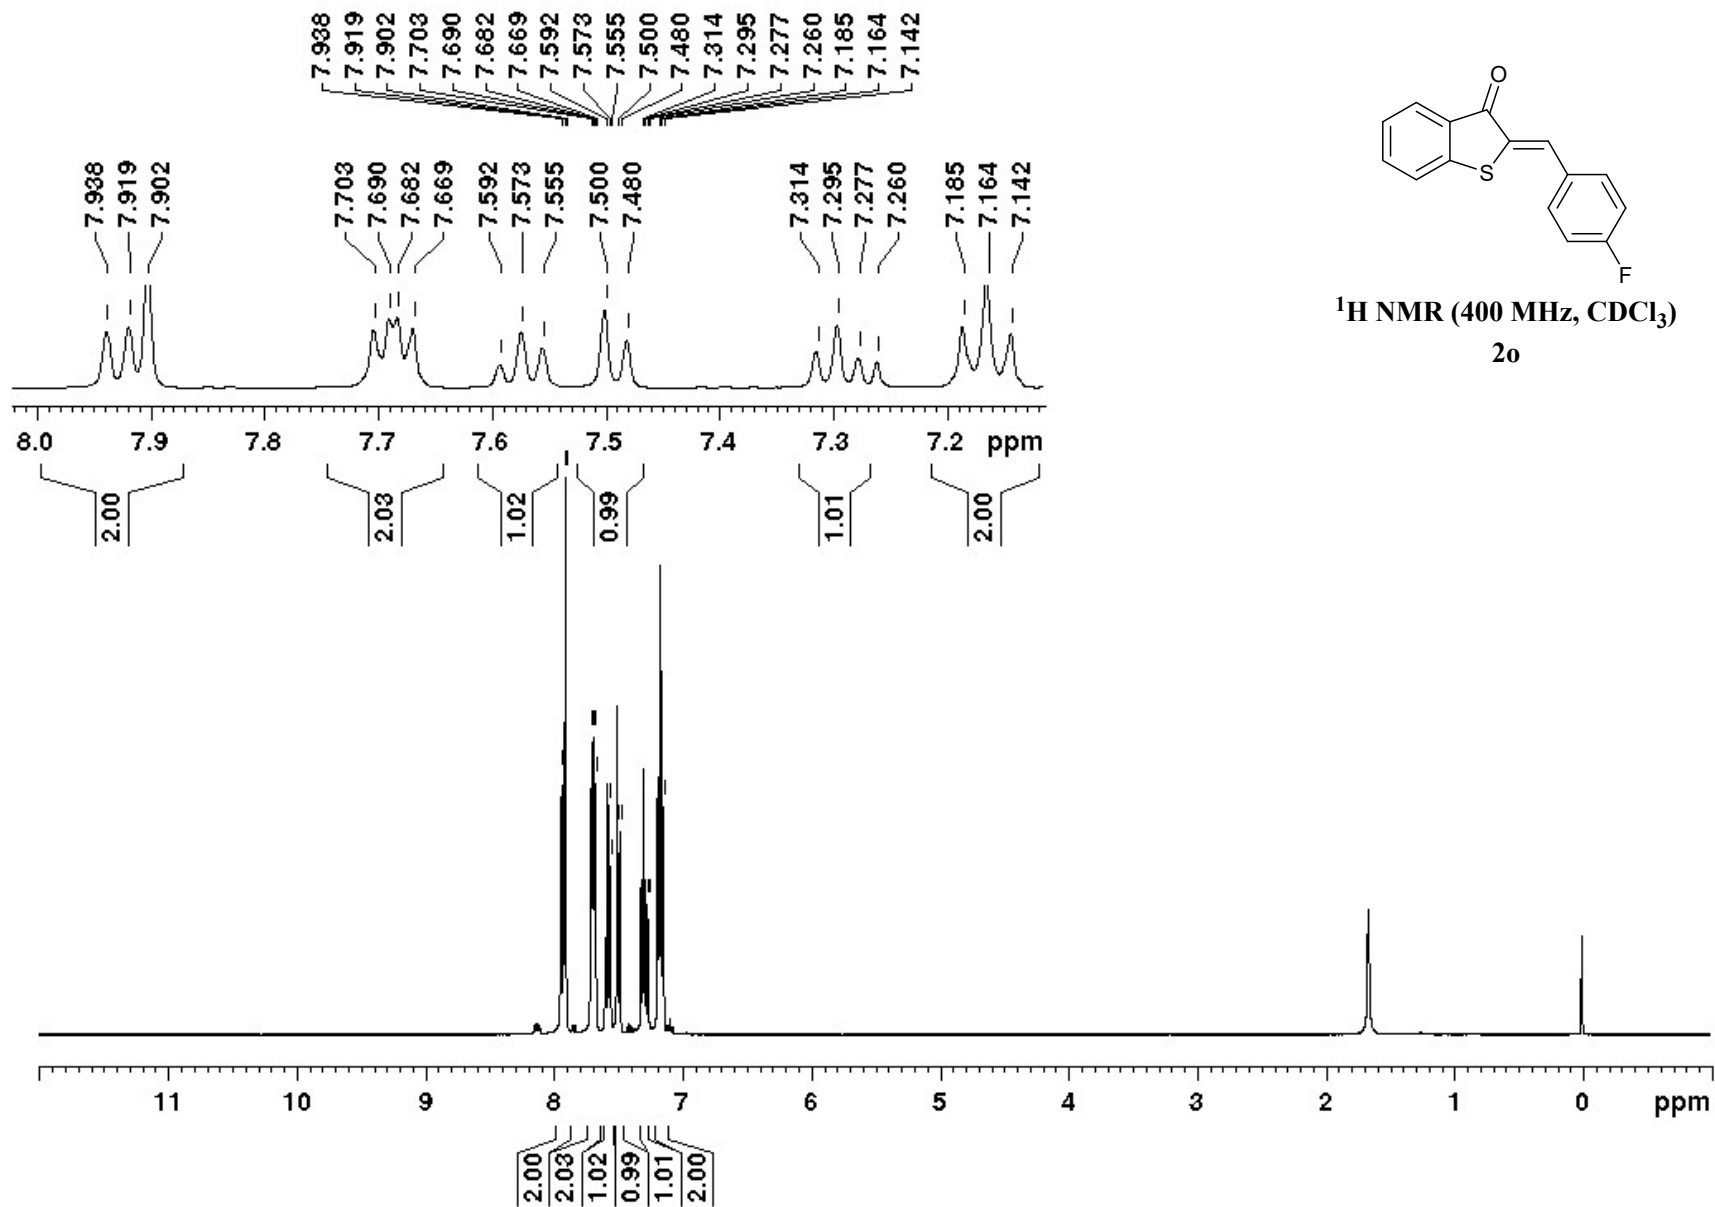

<sup>13</sup>C NMR spectrum of compound 2o

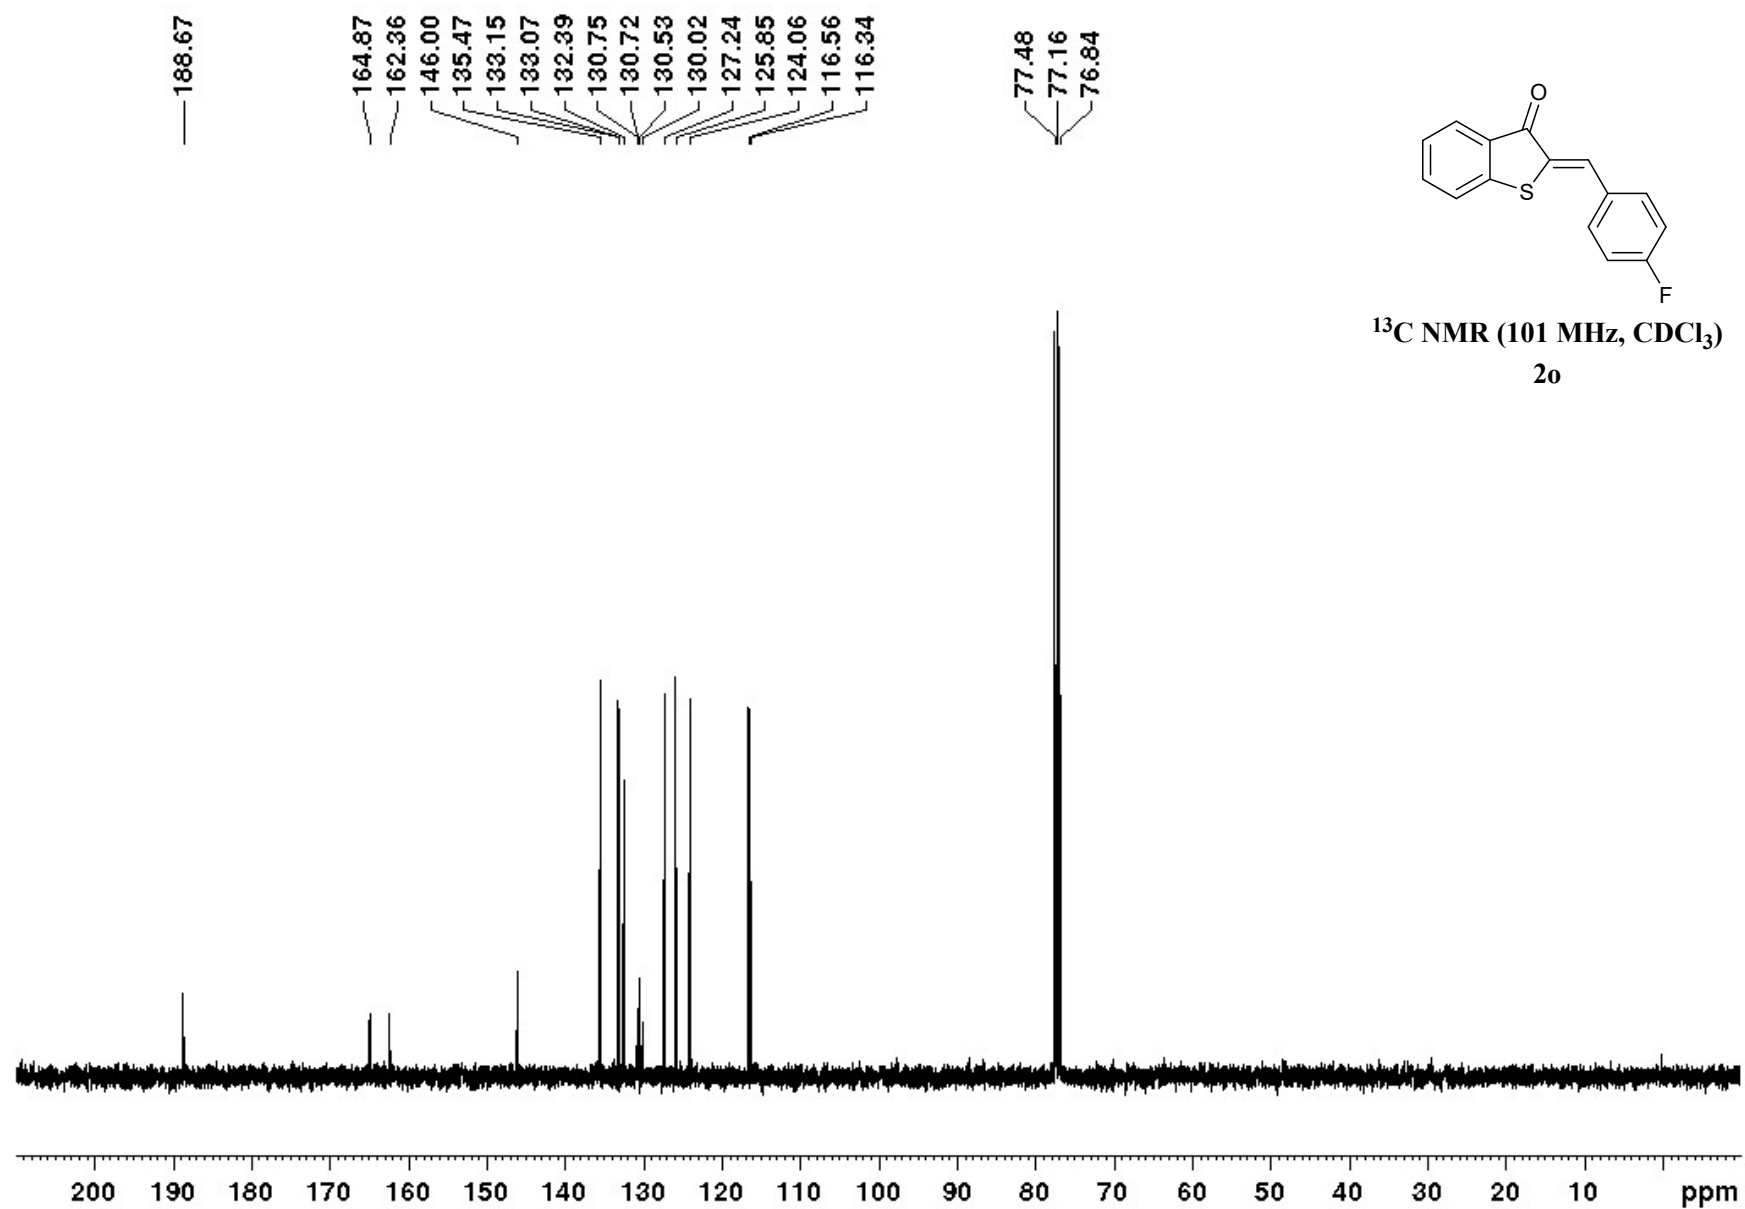

<sup>1</sup>H NMR spectrum of compound 2p

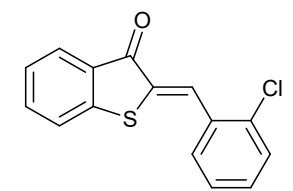

<sup>1</sup>H NMR (400 MHz, CDCl<sub>3</sub>)  
2p

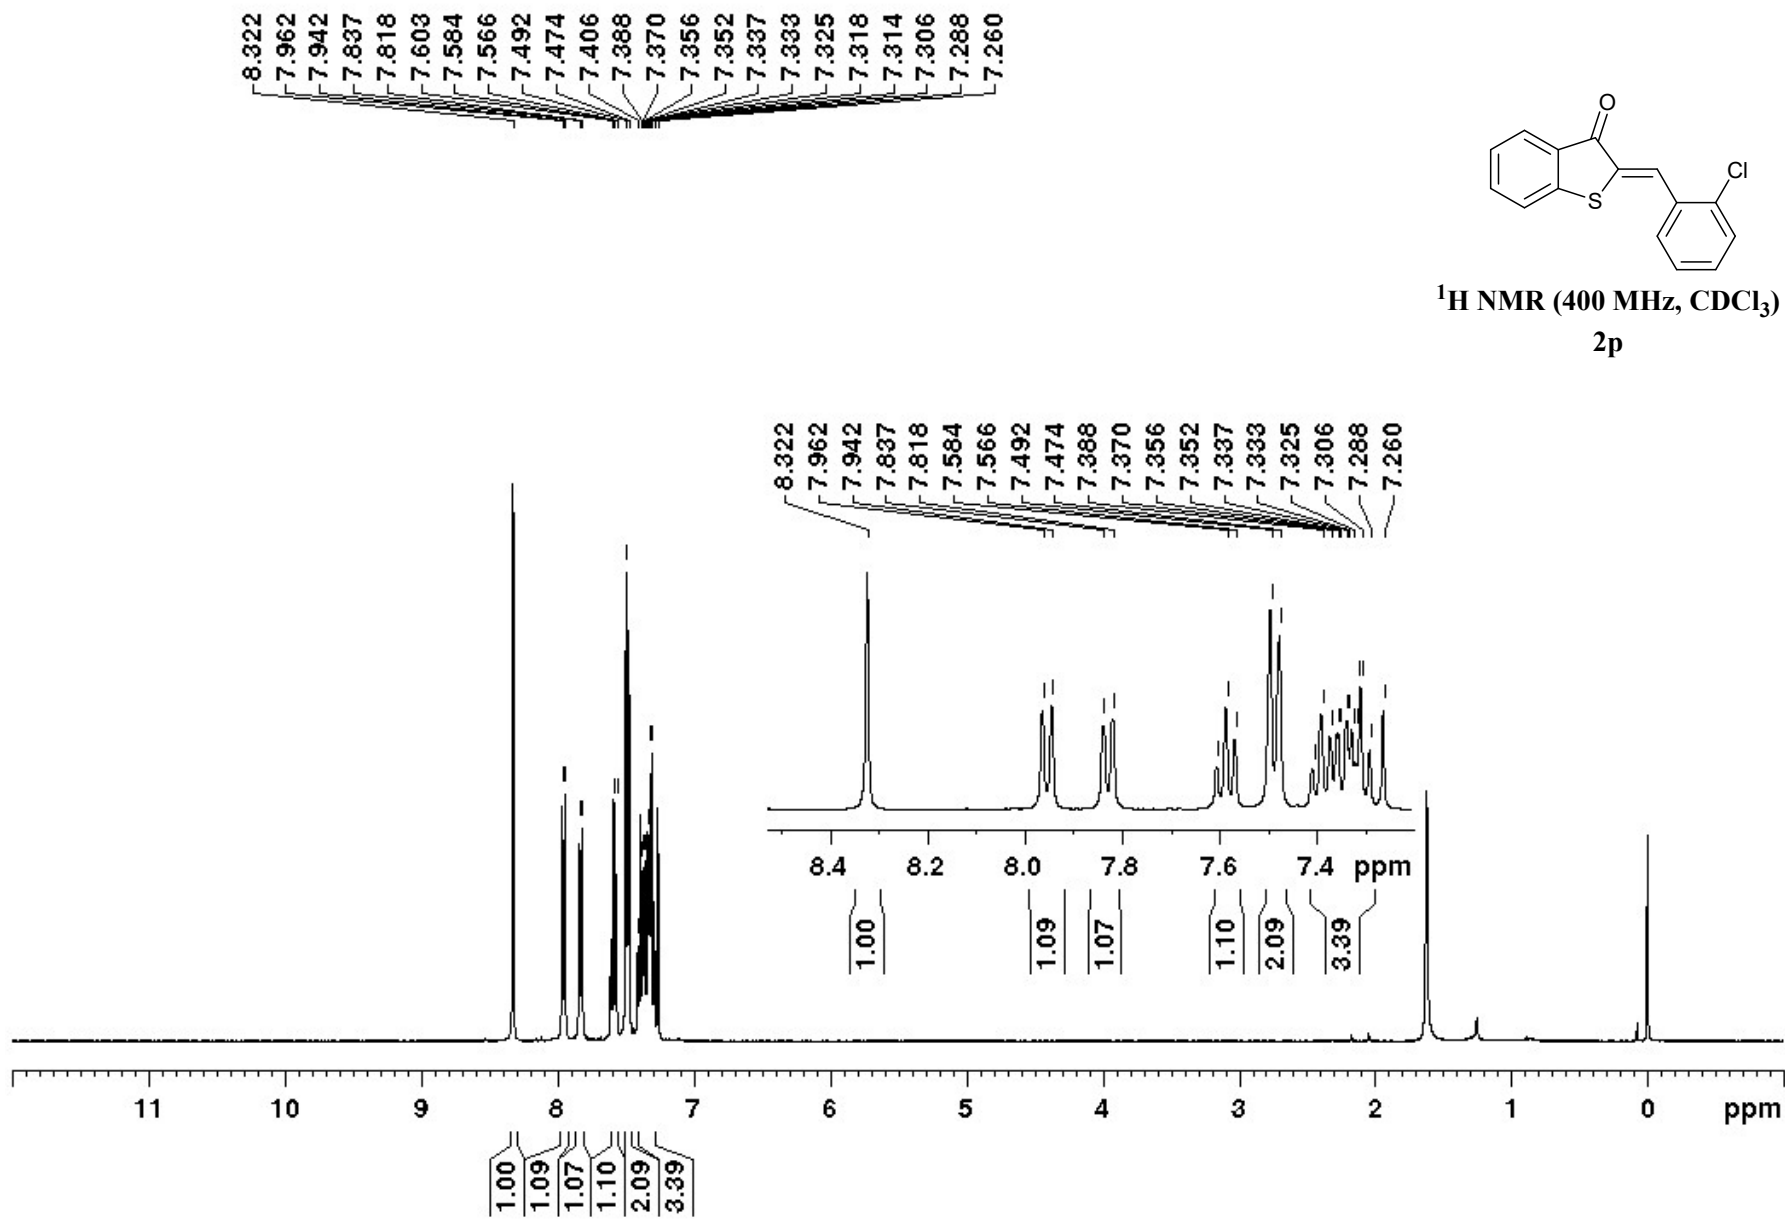

<sup>13</sup>C NMR spectrum of compound 2p

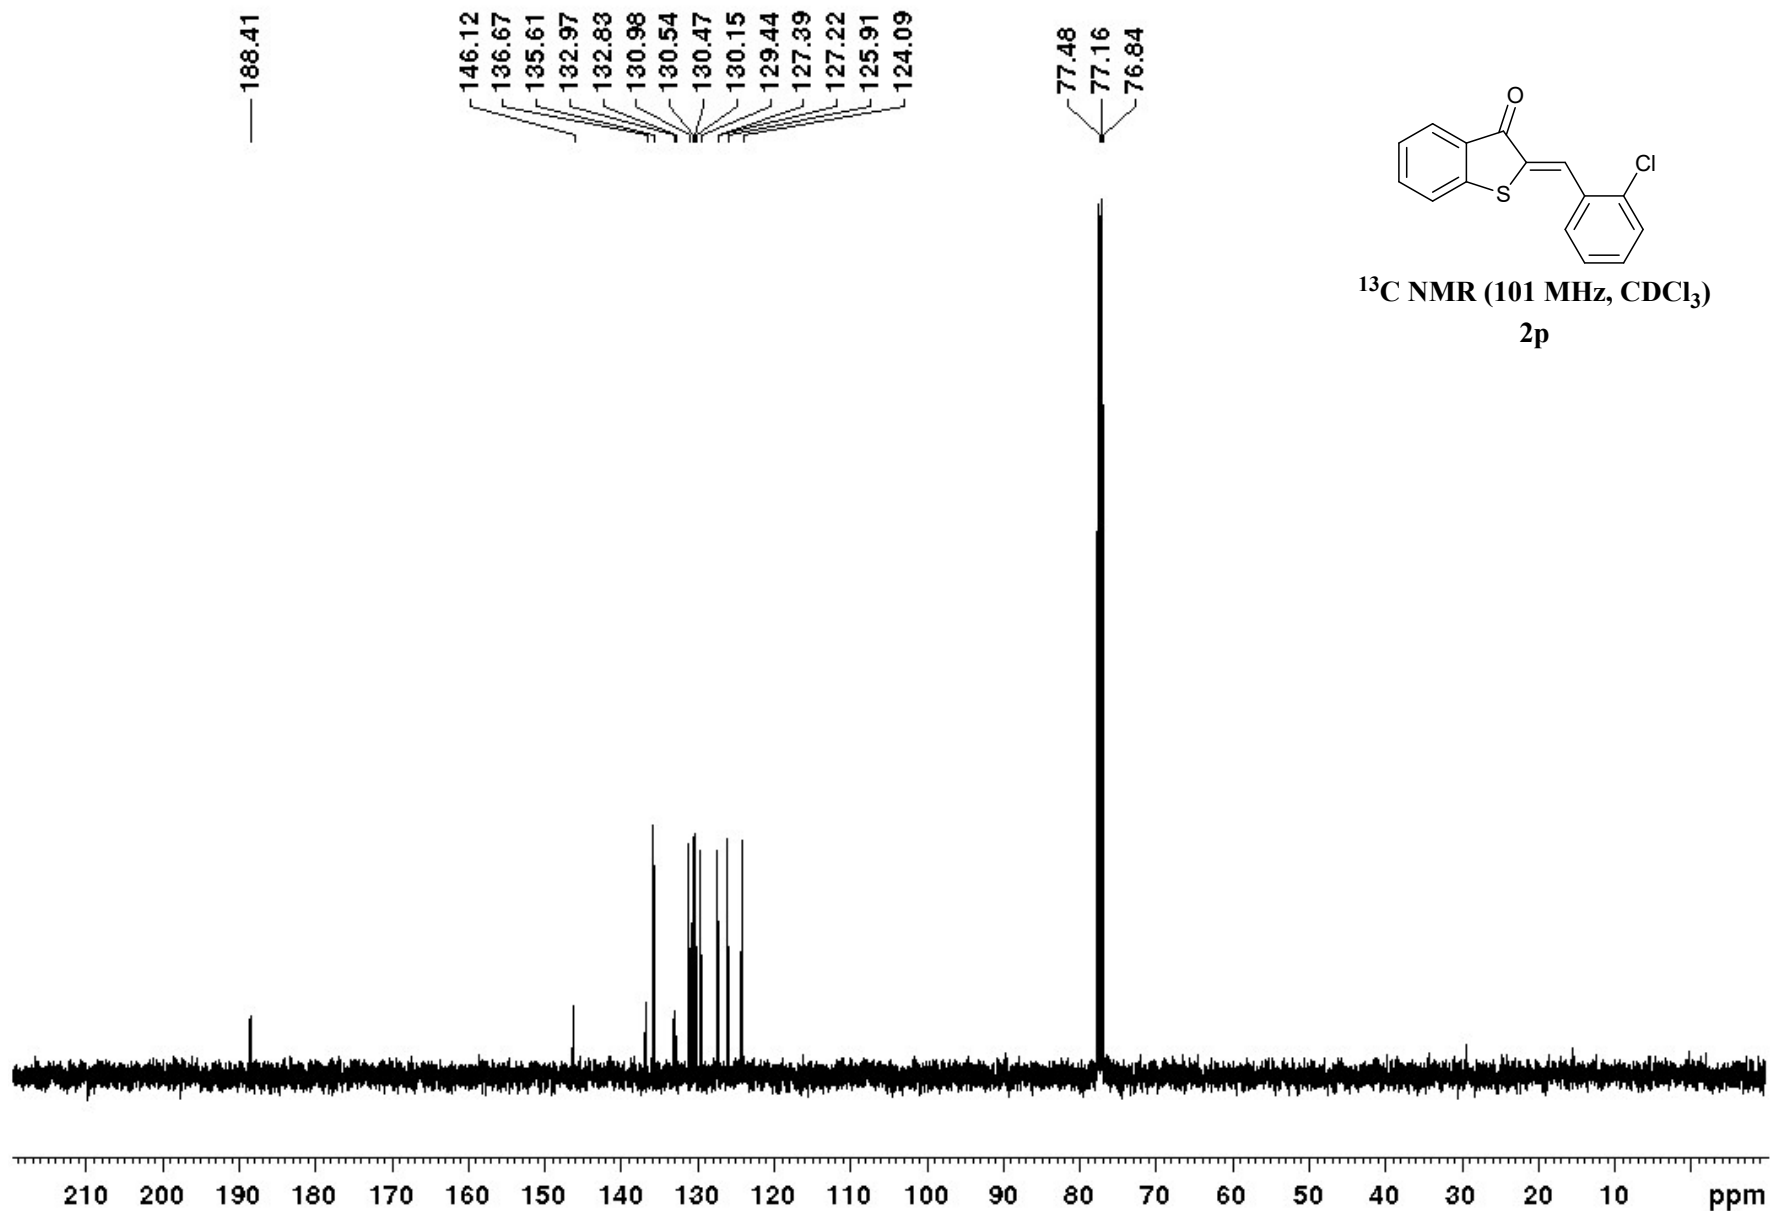



<sup>1</sup>H NMR spectrum of compound 2q

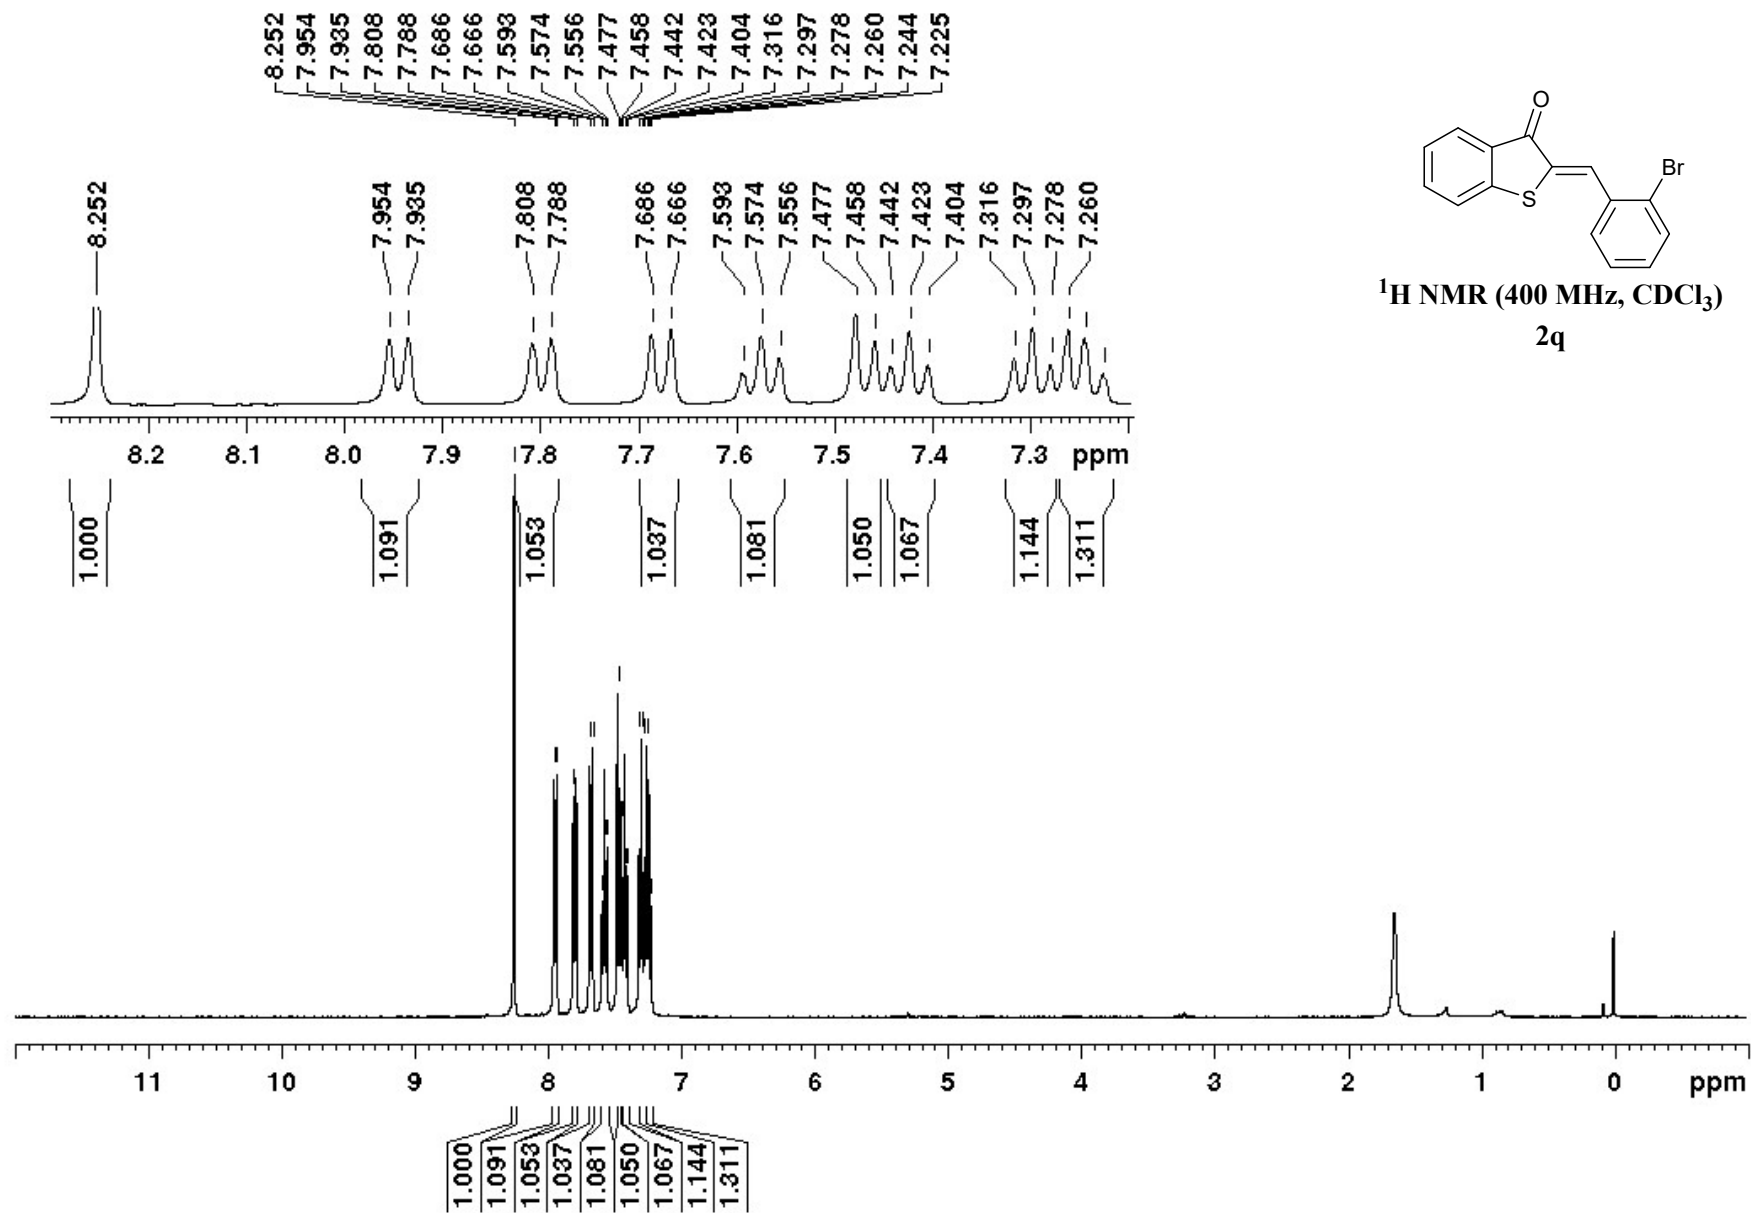

<sup>13</sup>C NMR spectrum of compound 2q

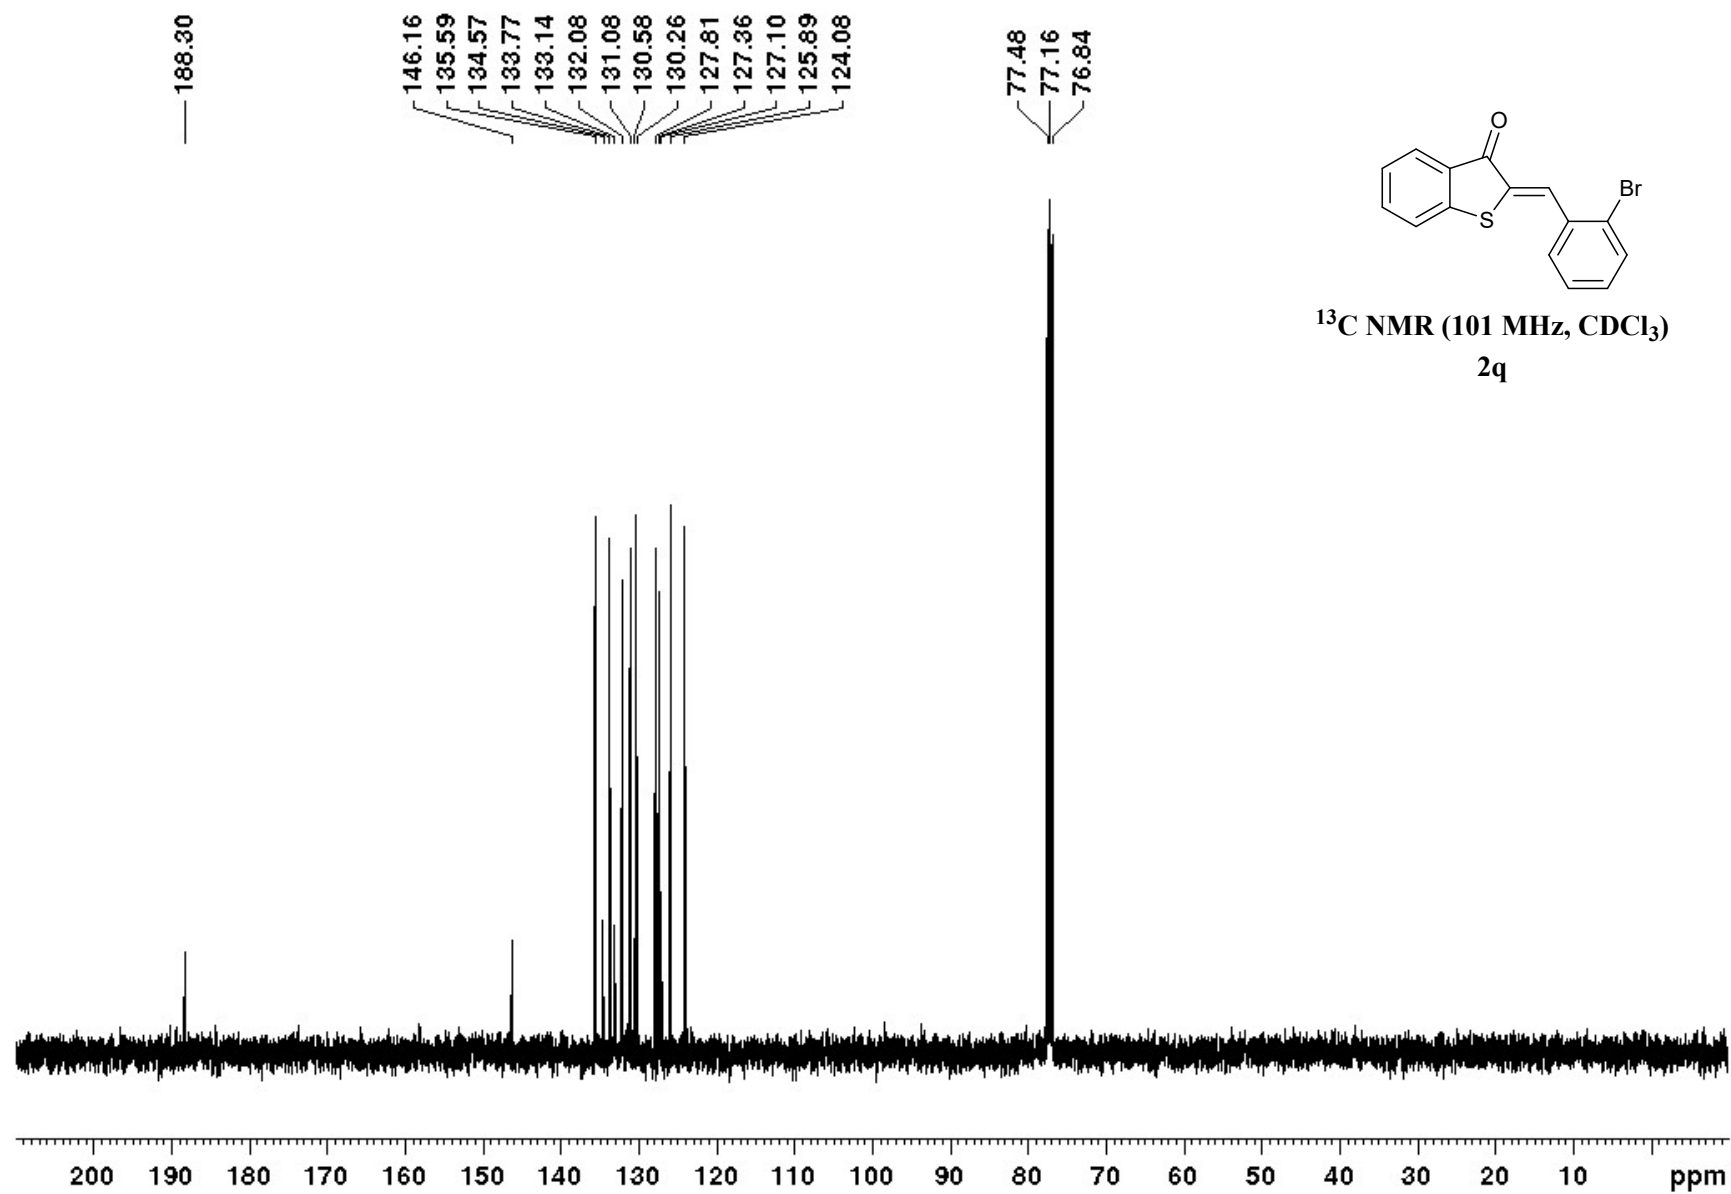

<sup>1</sup>H NMR spectrum of compound 2r

7.939  
7.920  
7.836  
7.823  
7.619  
7.601  
7.588  
7.569  
7.536  
7.515  
7.506  
7.487  
7.360  
7.341  
7.322  
7.305  
7.286  
7.260

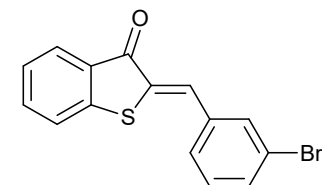

<sup>1</sup>H NMR (400 MHz, CDCl<sub>3</sub>)

2r

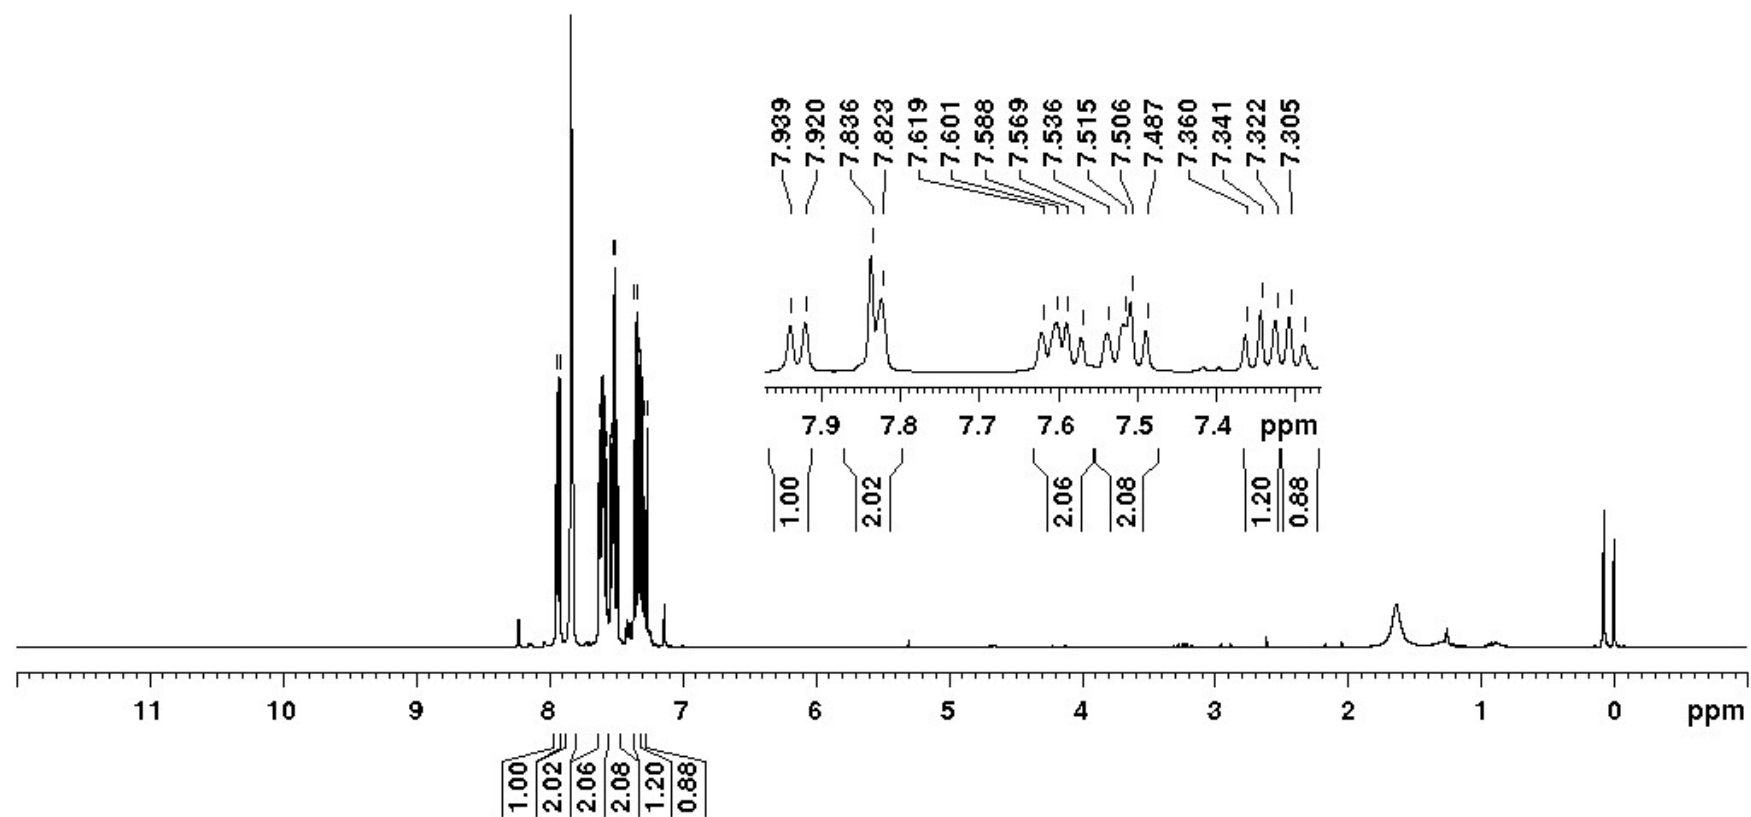

<sup>13</sup>C NMR spectrum of compound 2r

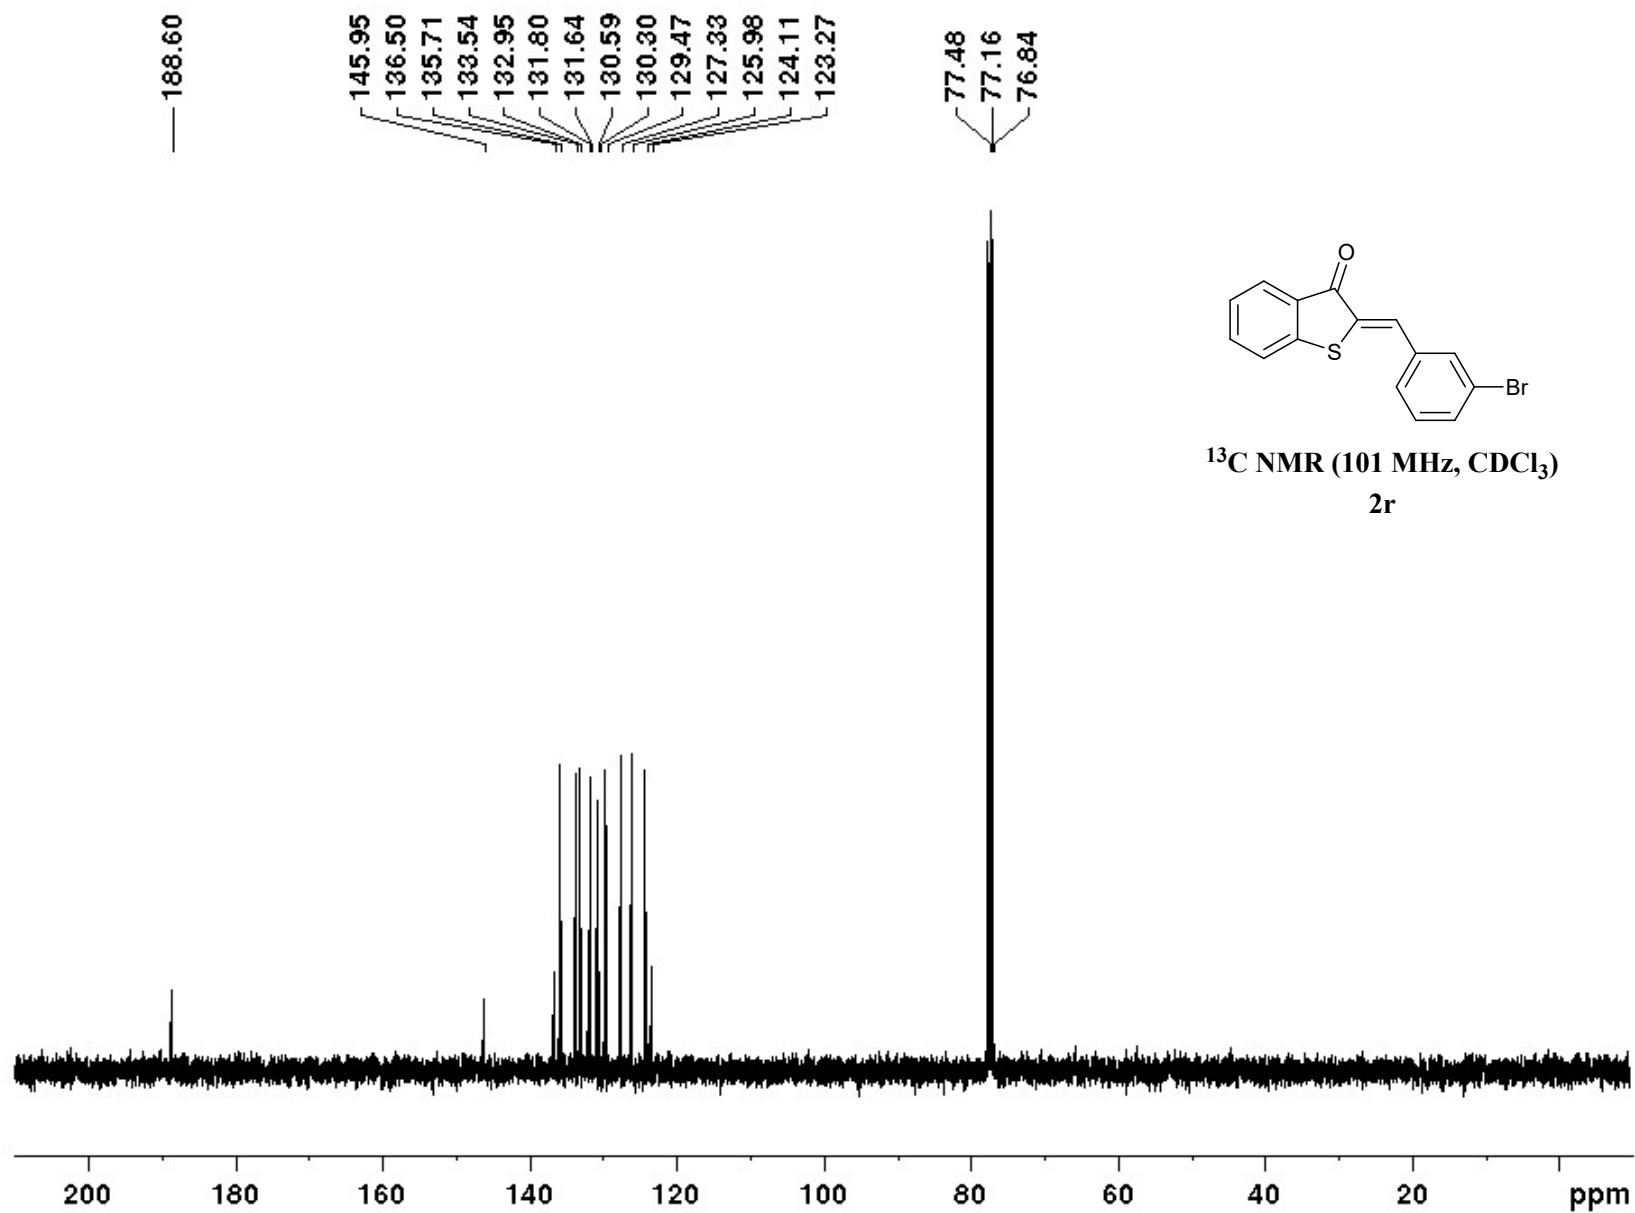

<sup>1</sup>H NMR spectrum of compound 2s

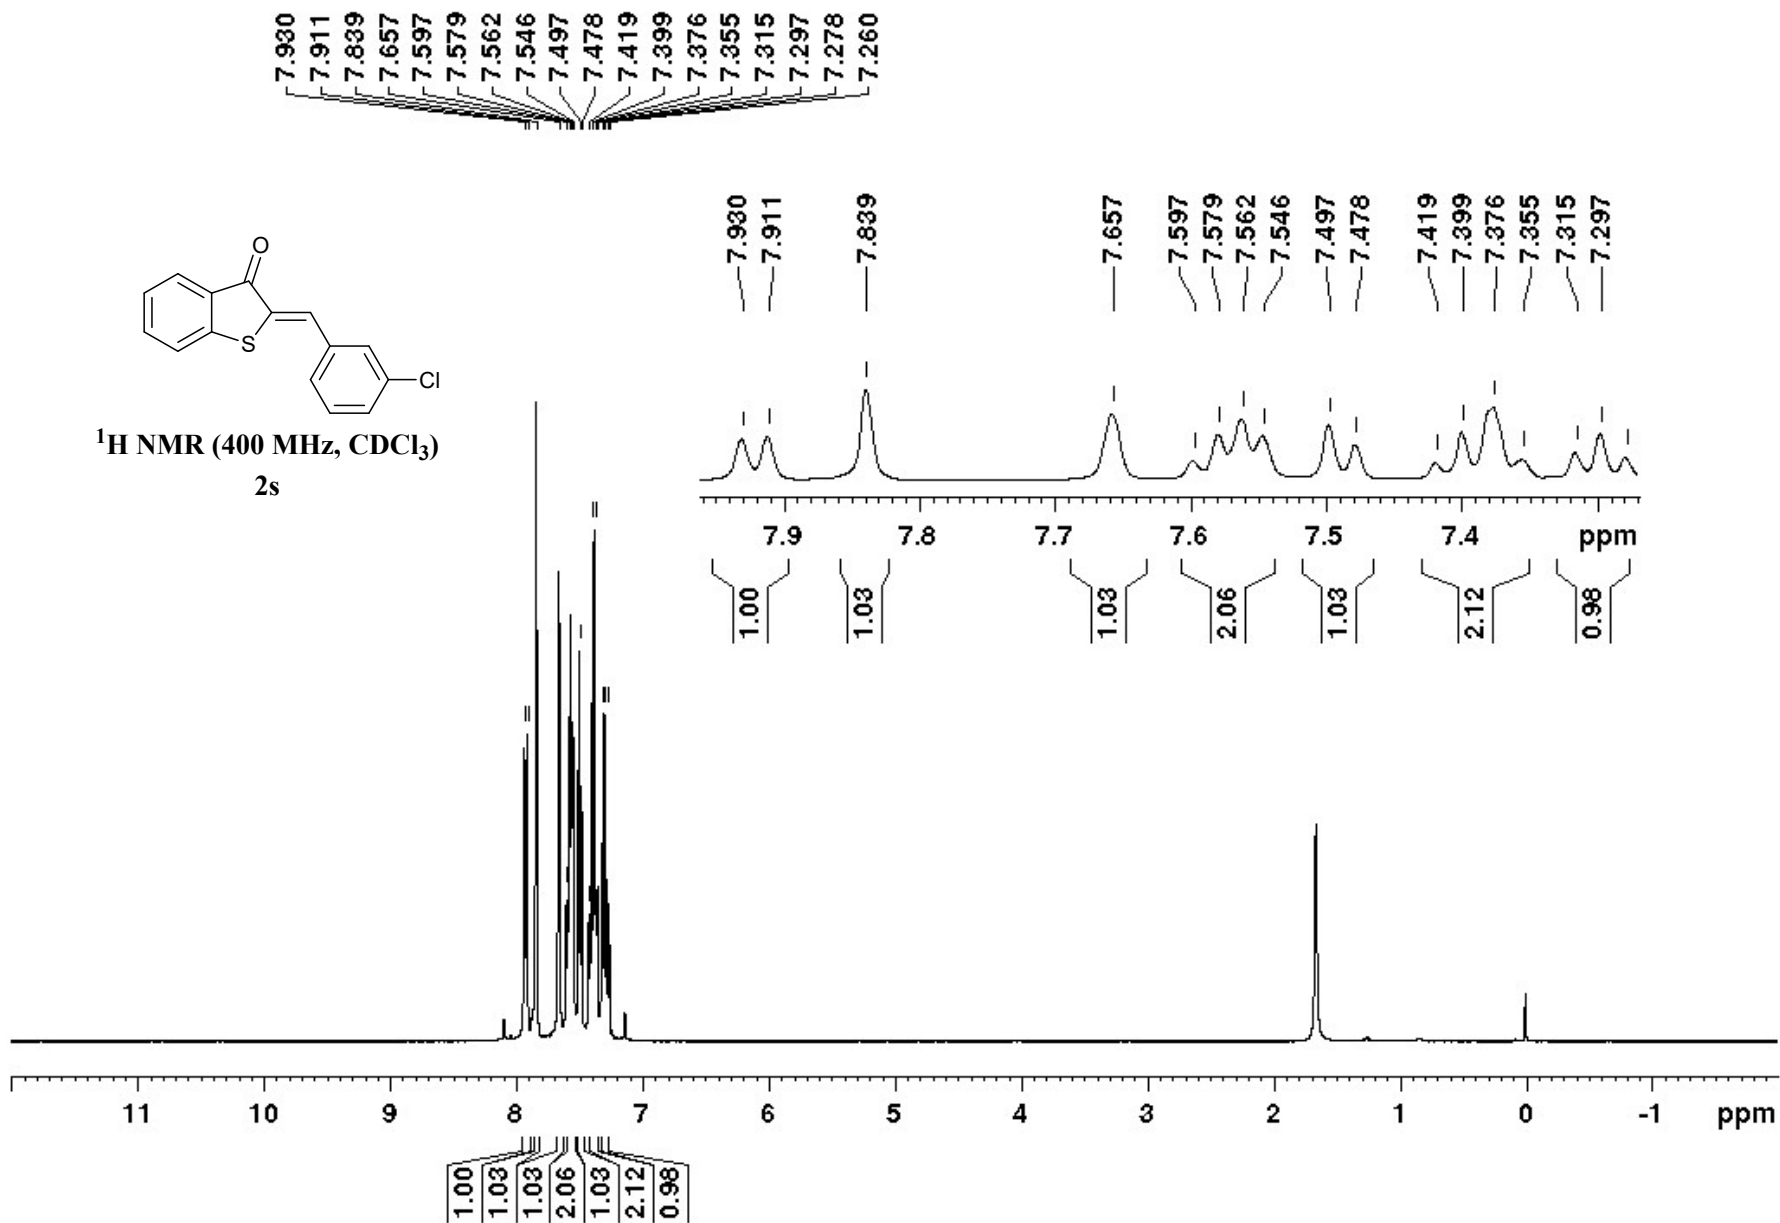

<sup>13</sup>C NMR spectrum of compound 2s

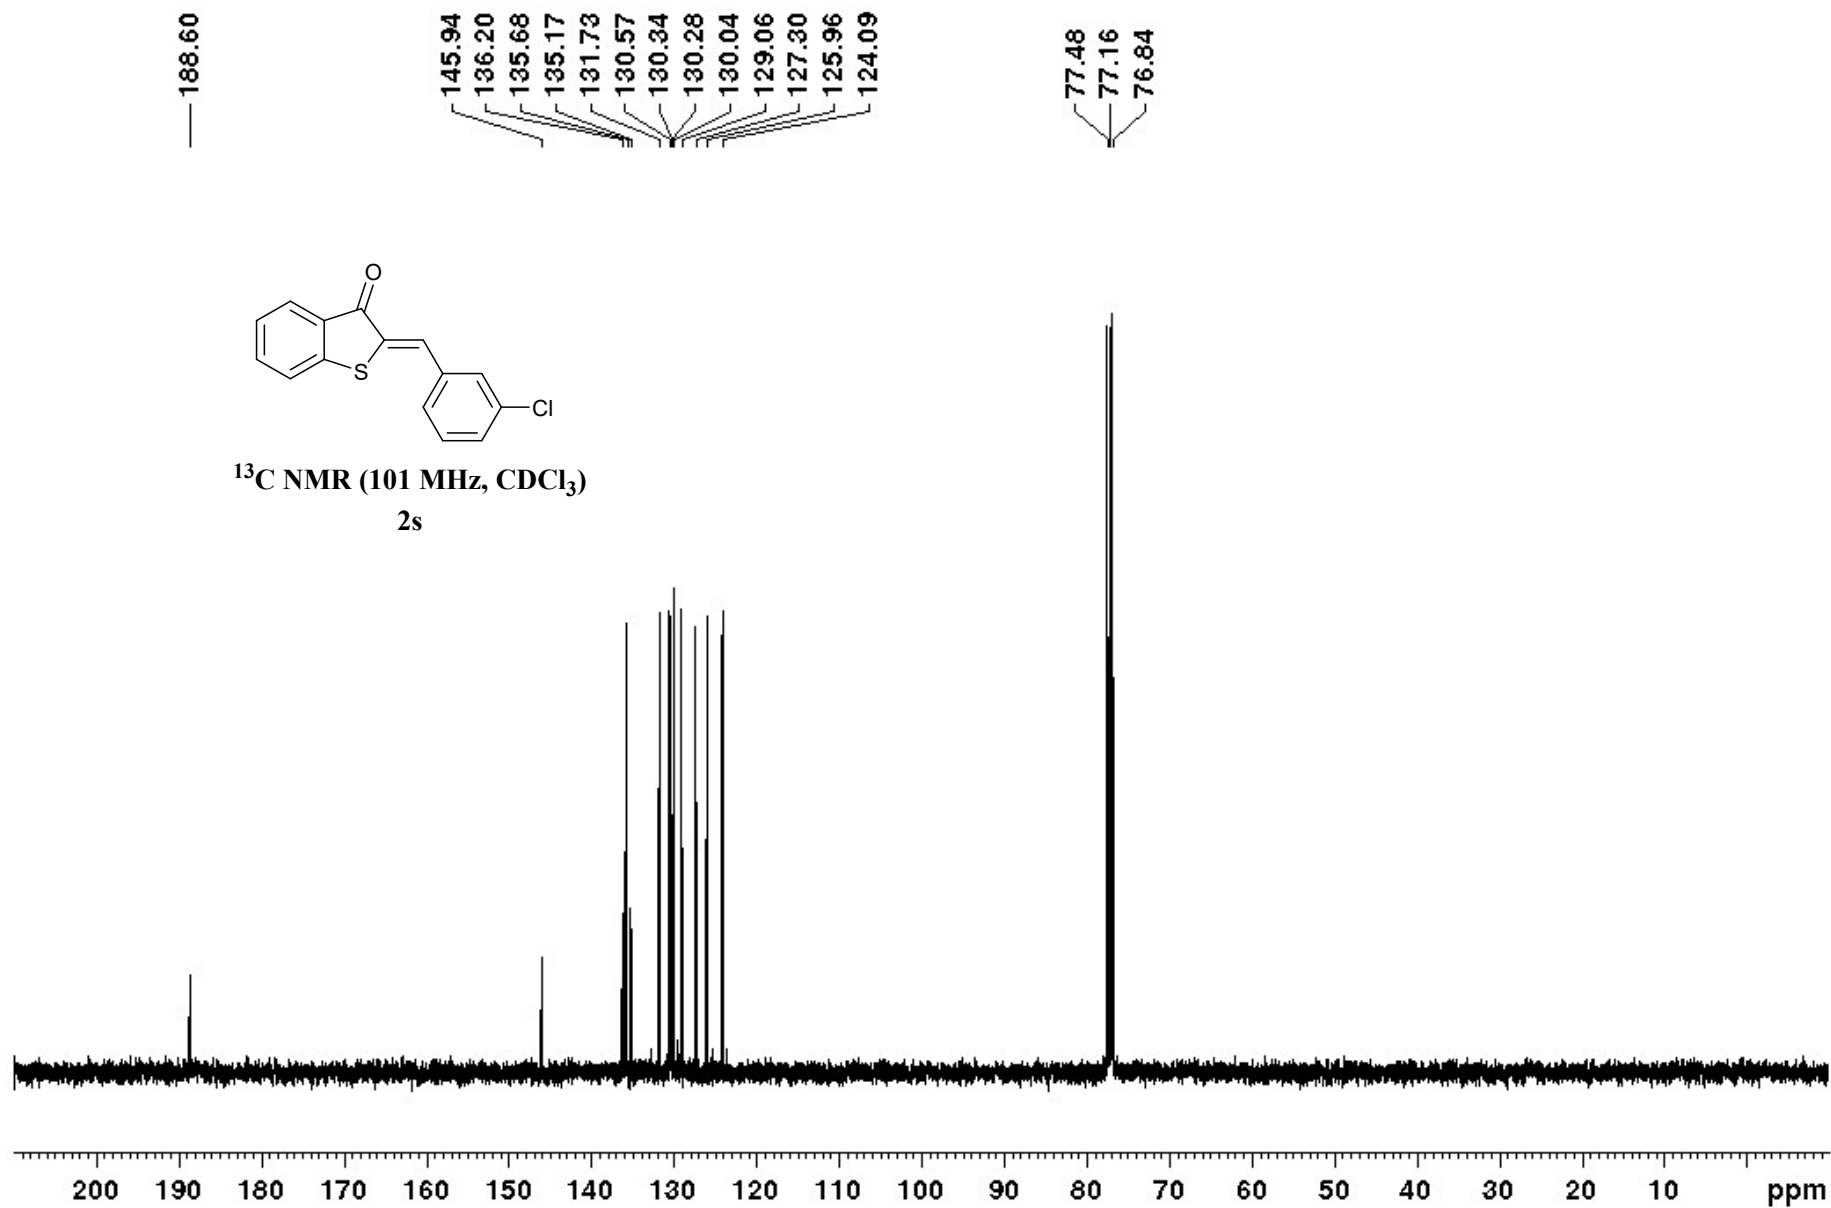

<sup>1</sup>H NMR spectrum of compound 2t

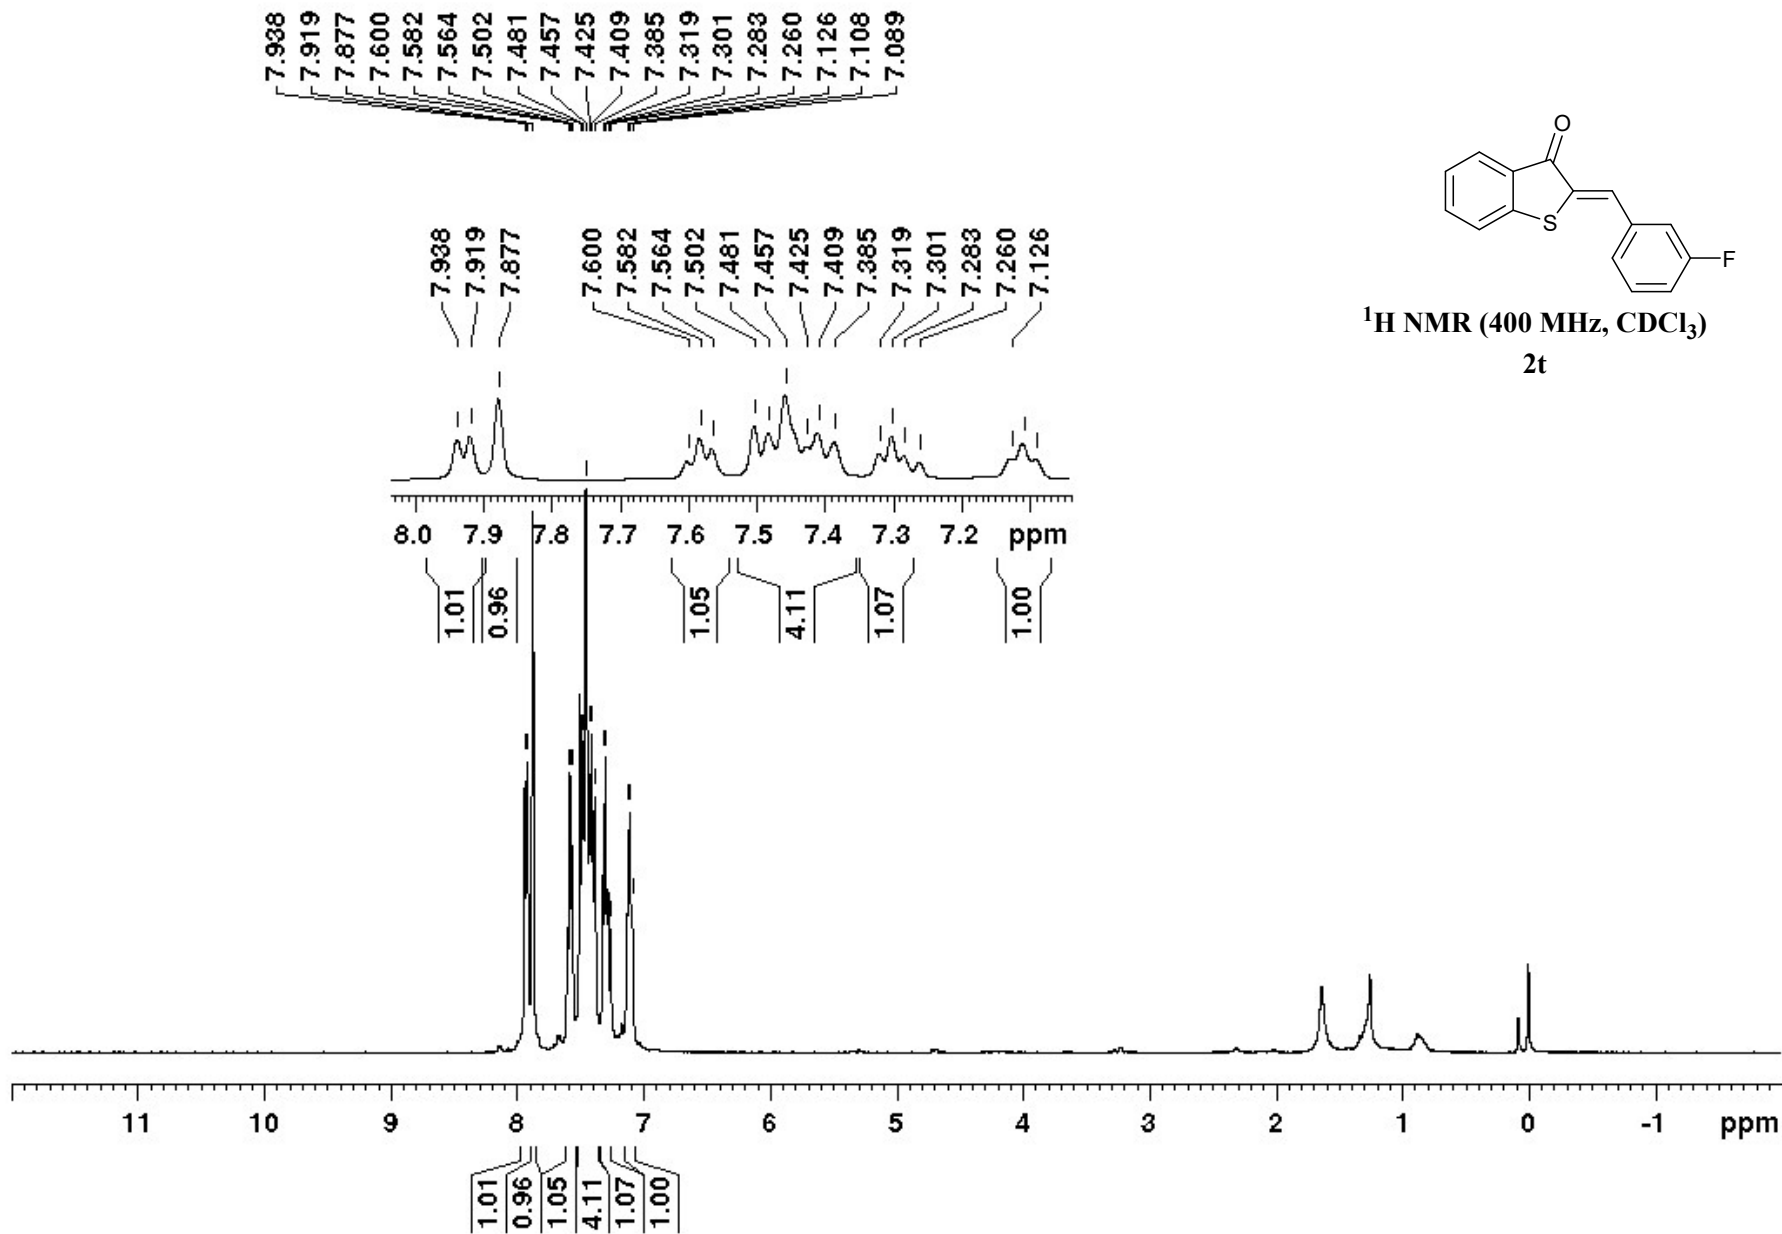

<sup>13</sup>C NMR spectrum of compound 2t

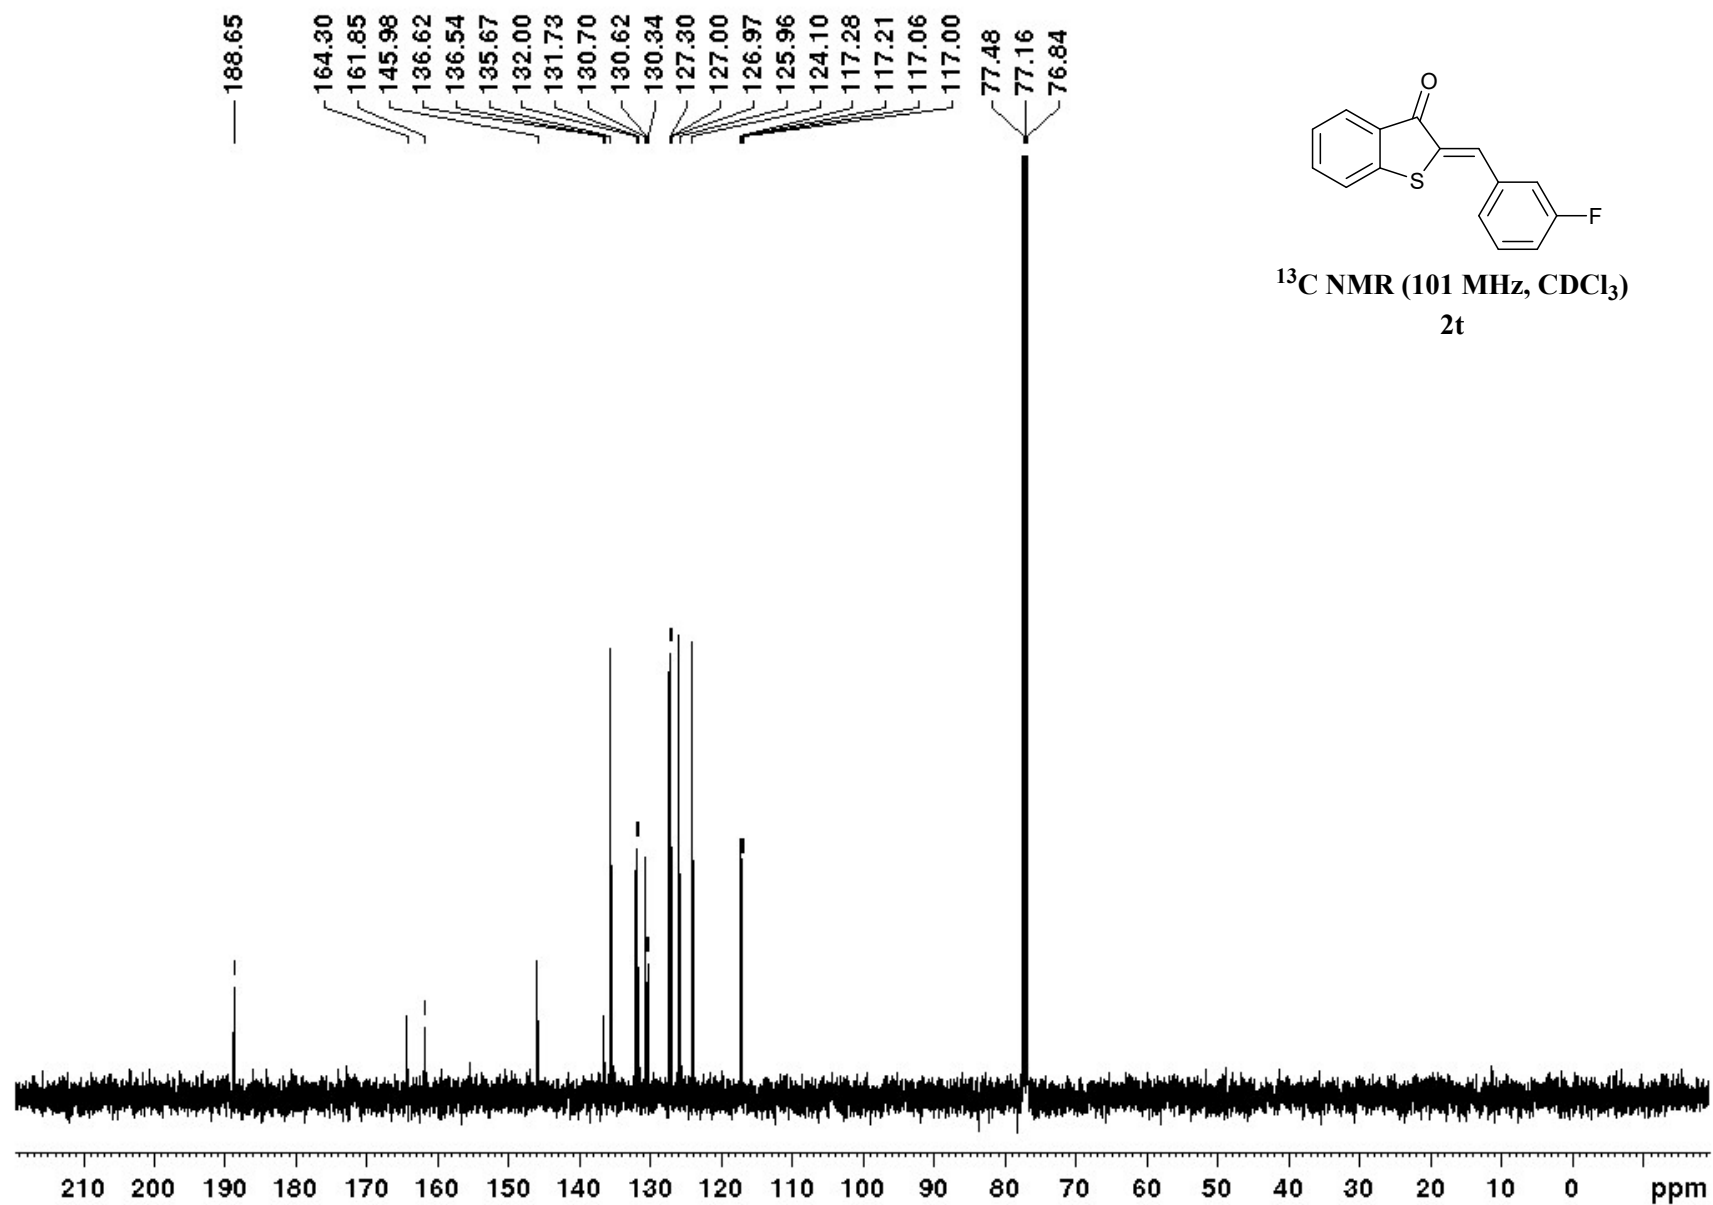



<sup>1</sup>H NMR spectrum of compound 2u

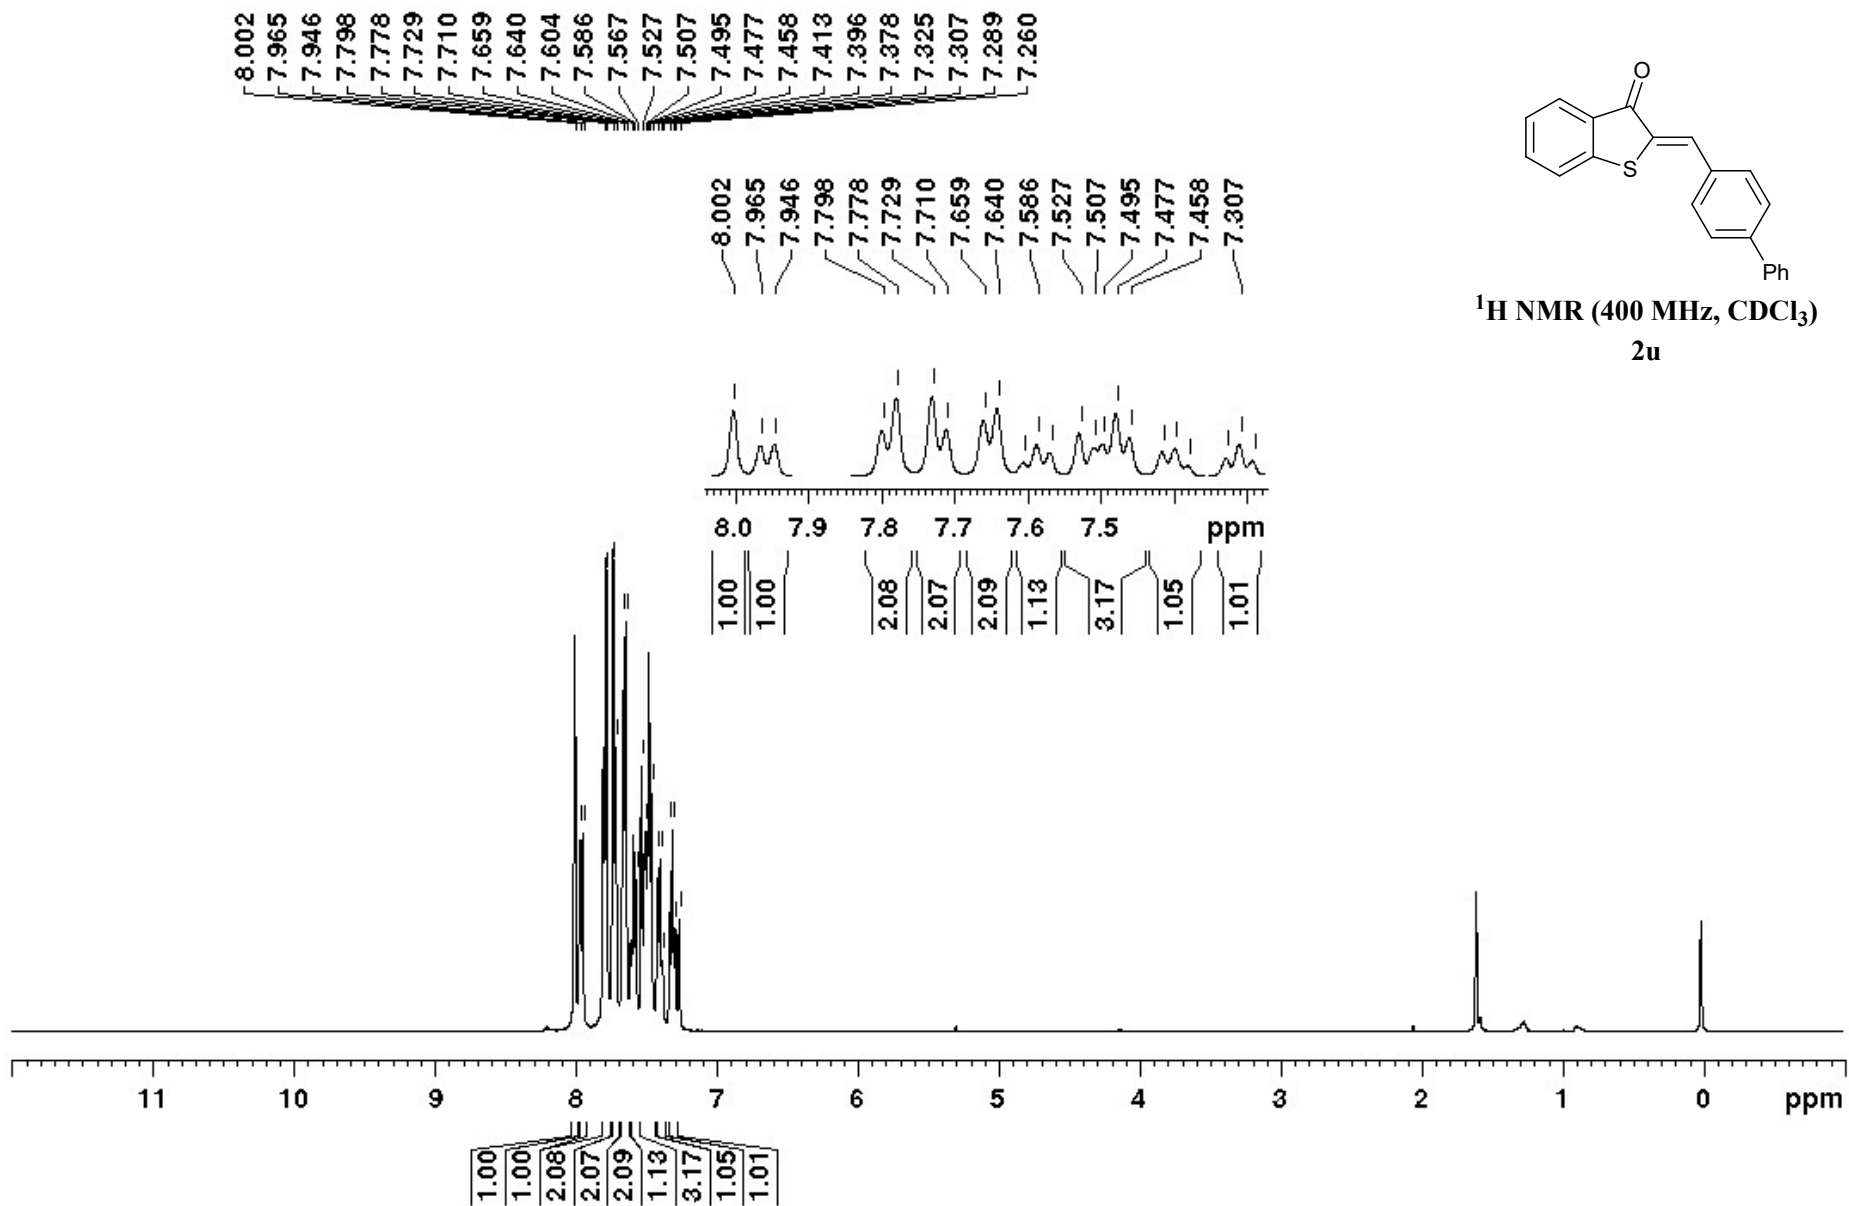

<sup>13</sup>C NMR spectrum of compound 2u

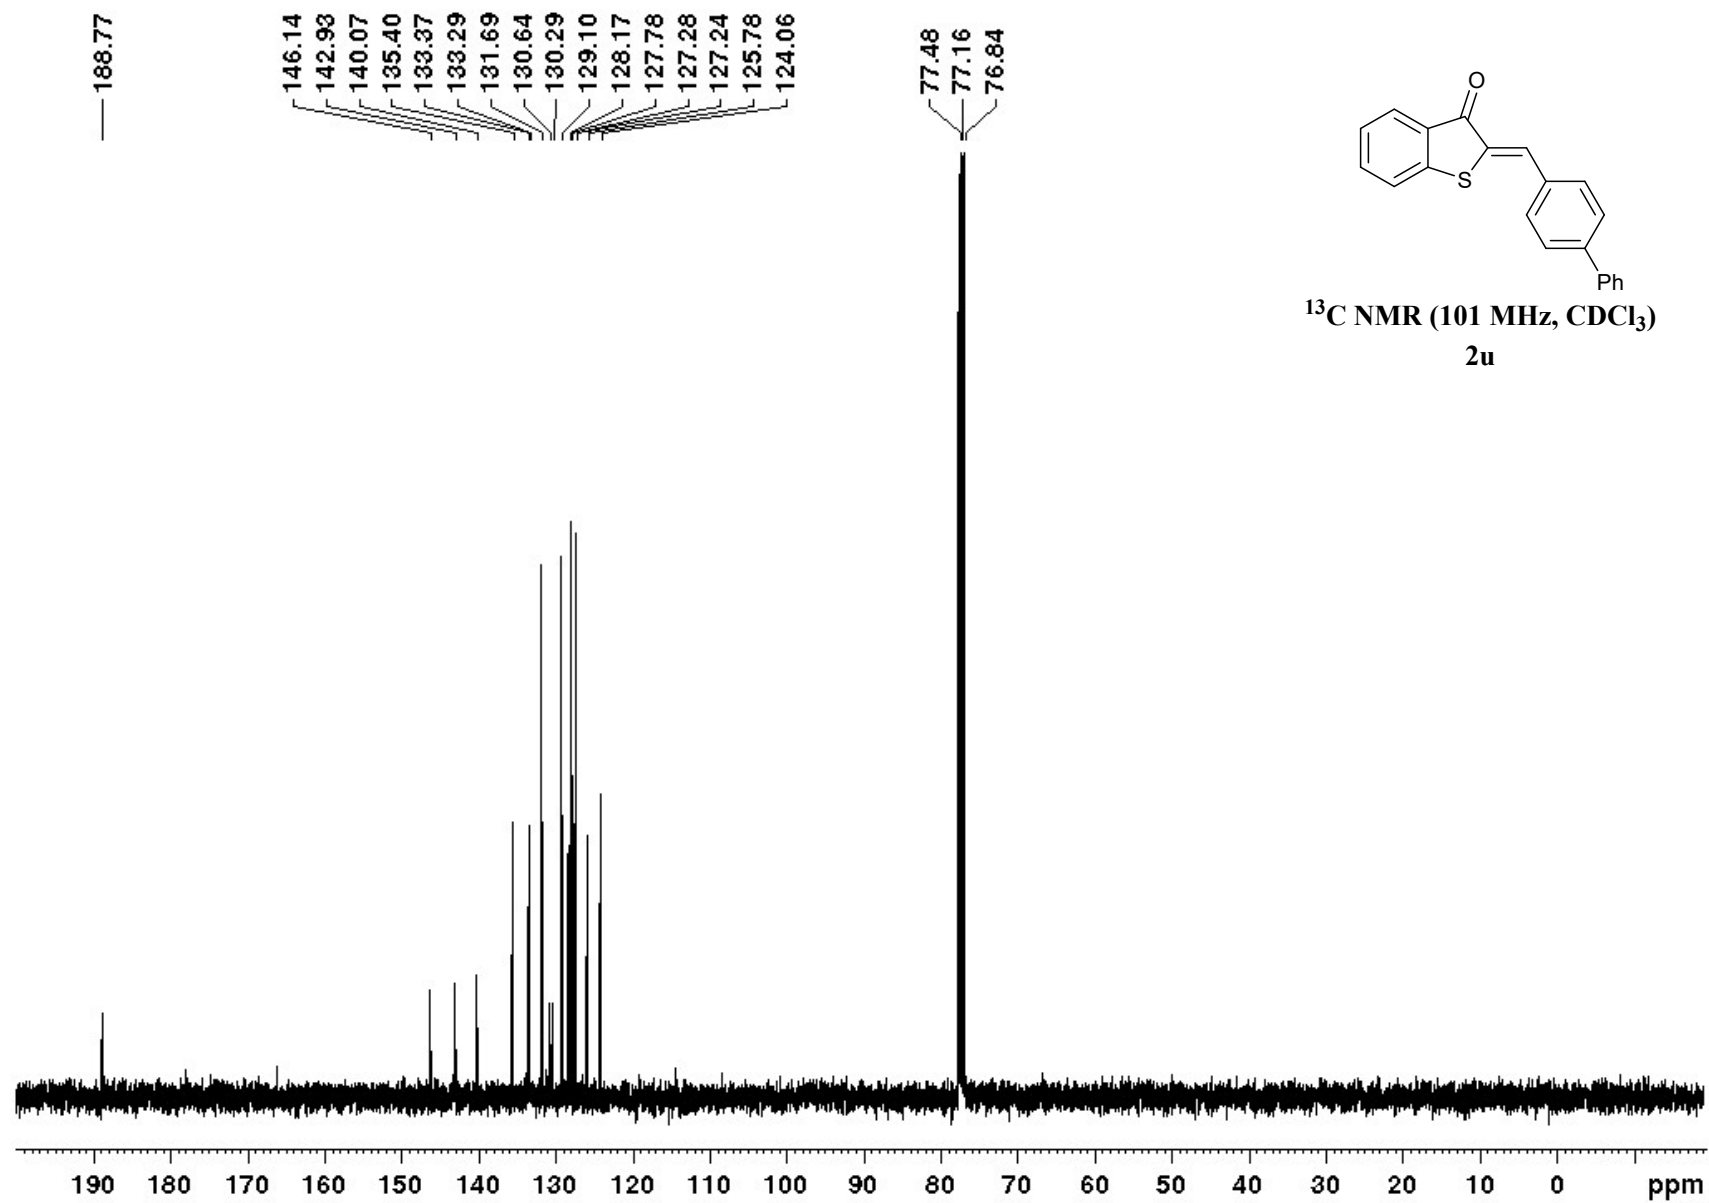

<sup>1</sup>H NMR spectrum of compound 2v

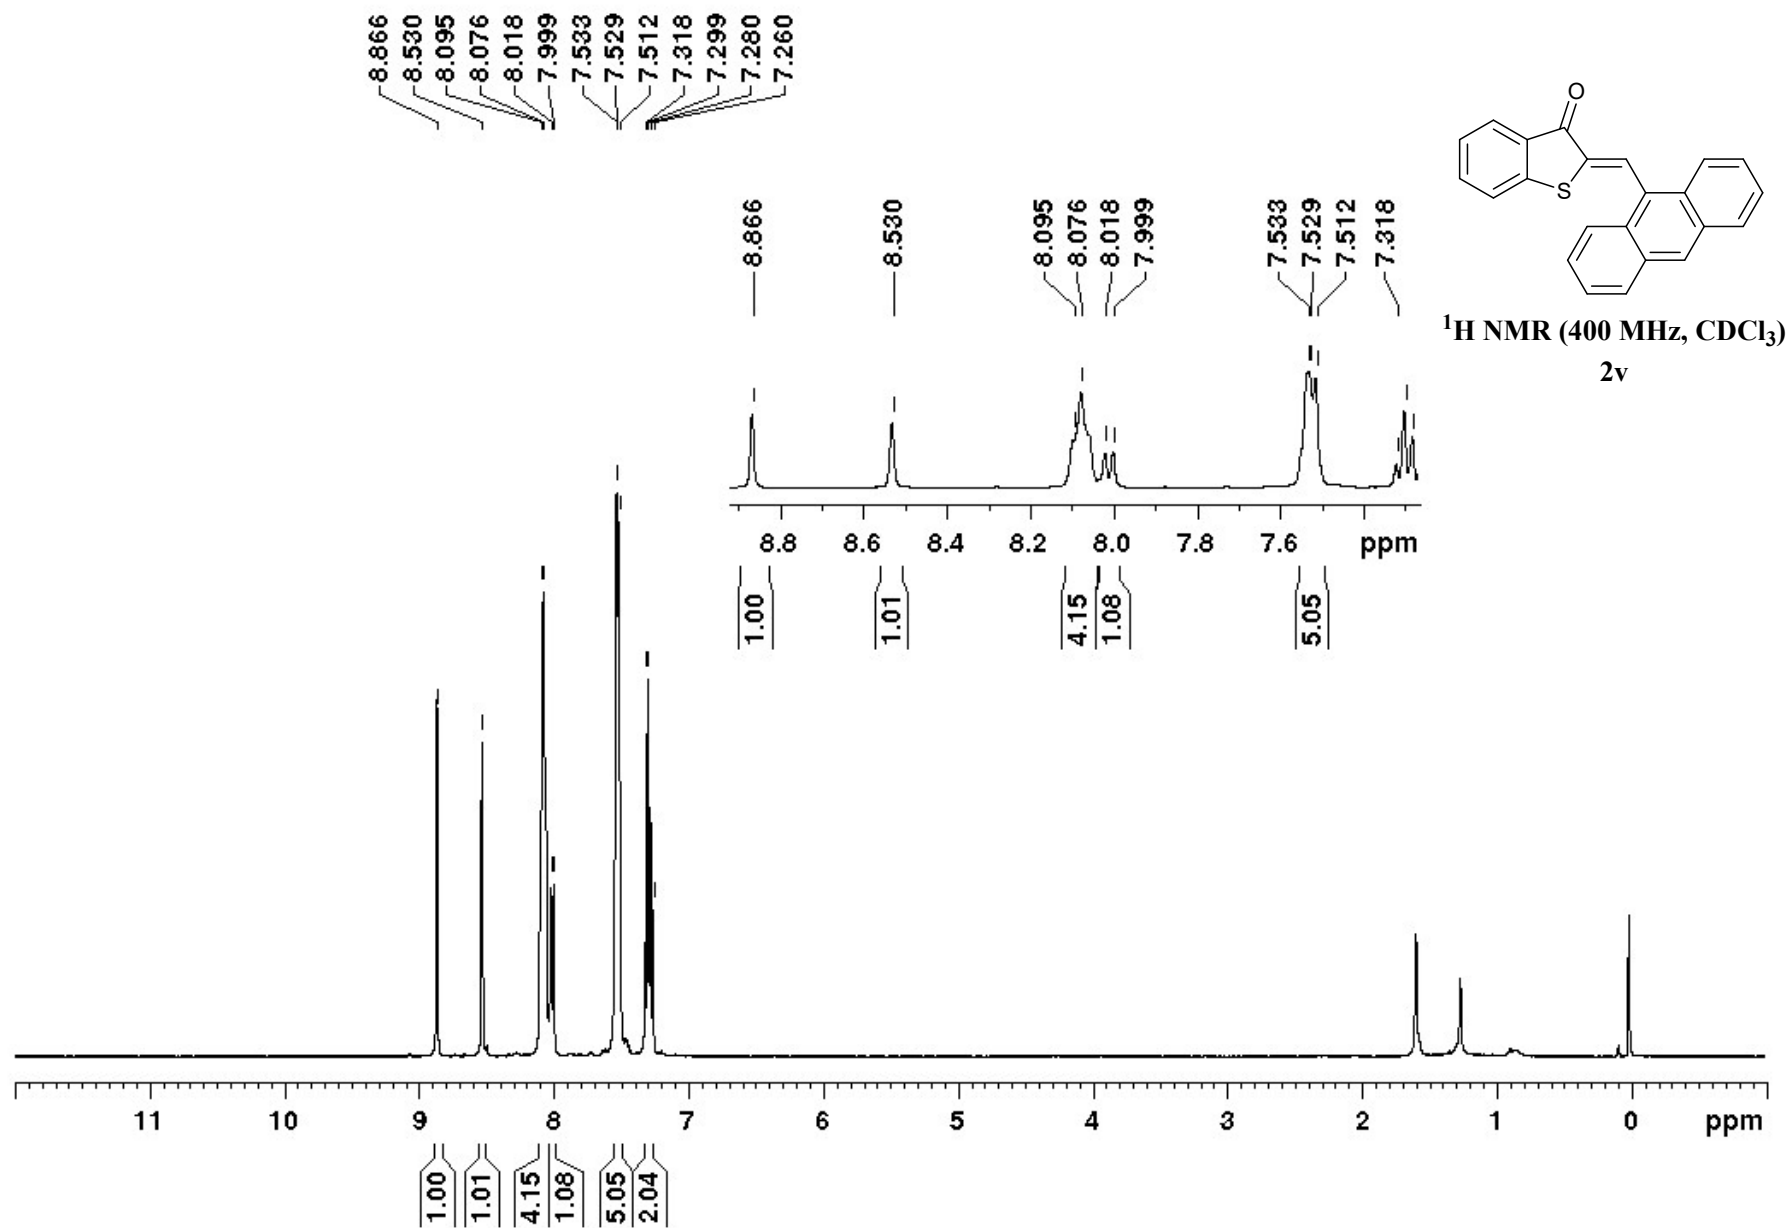

<sup>13</sup>C NMR spectrum of compound 2v

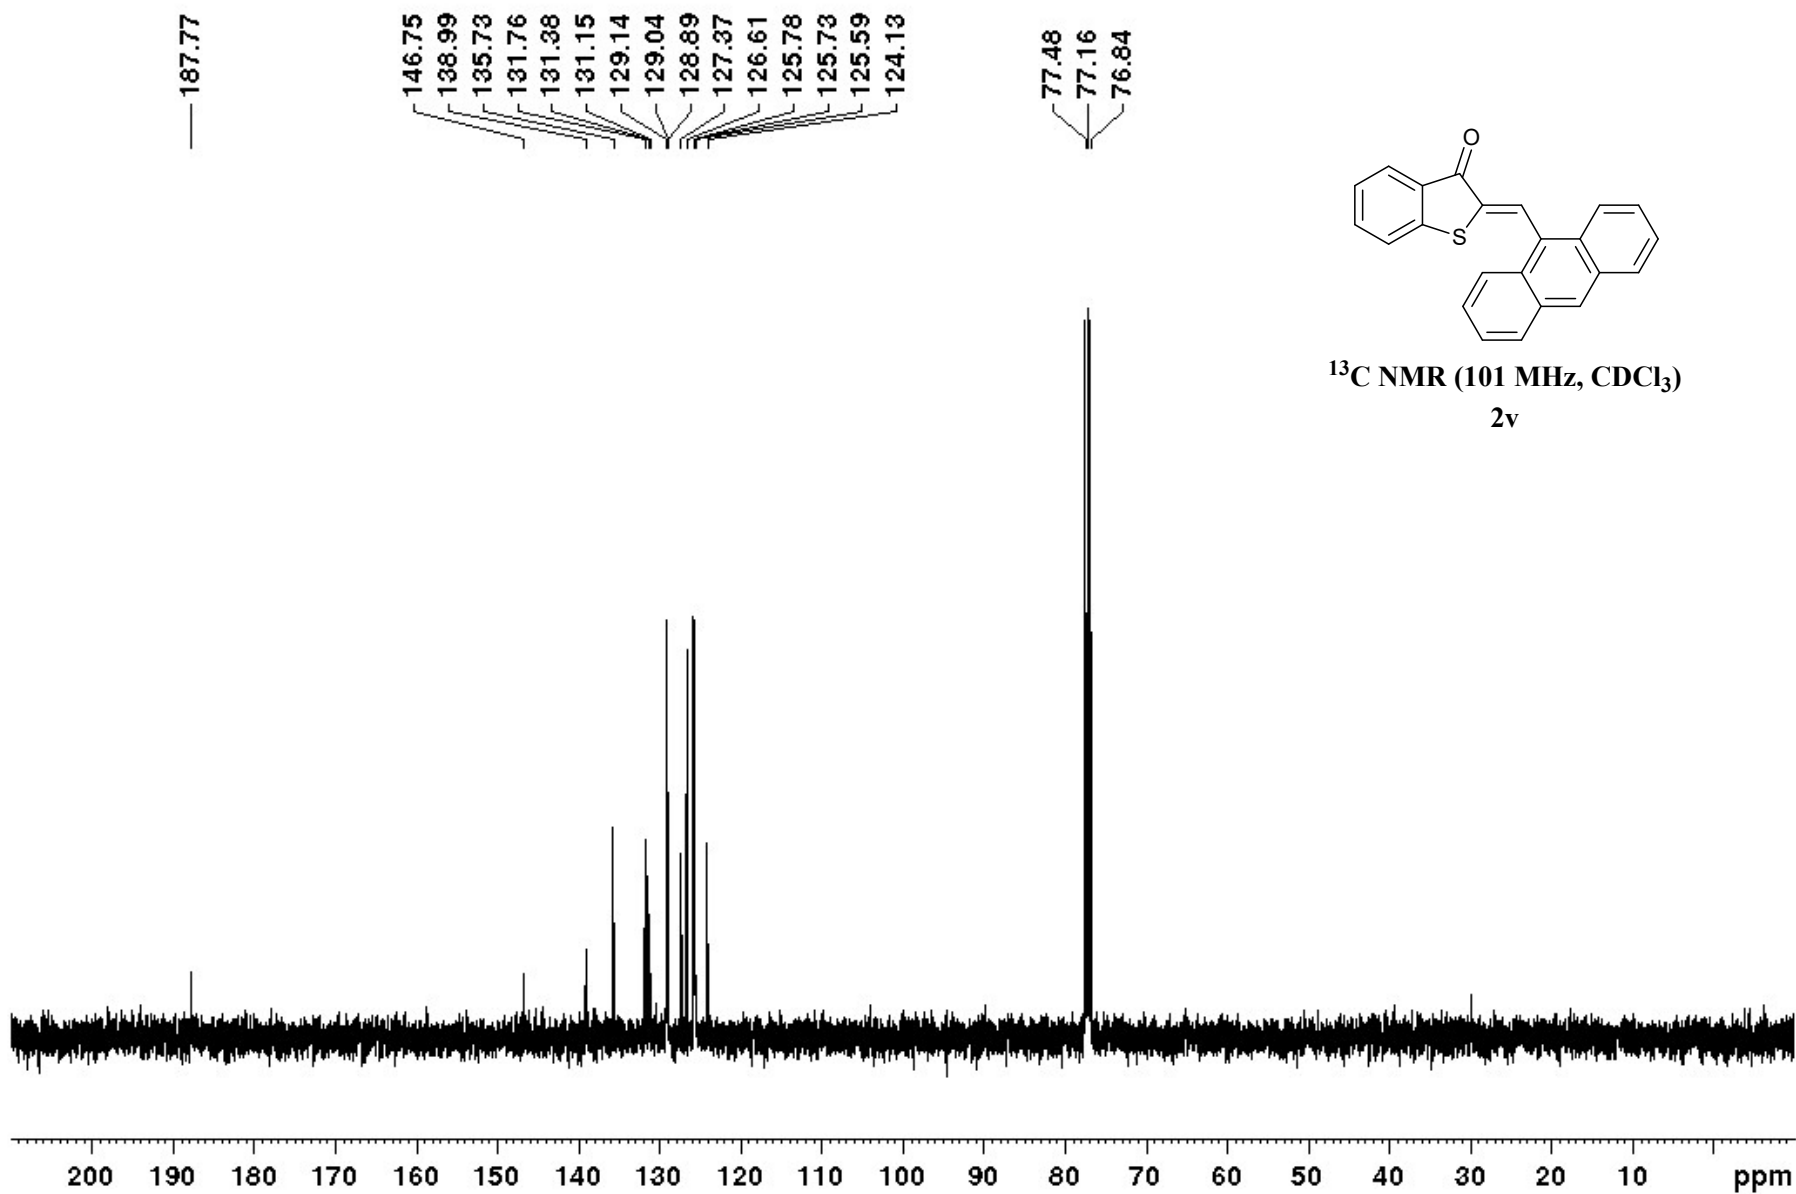

<sup>1</sup>H NMR spectrum of compound 2w

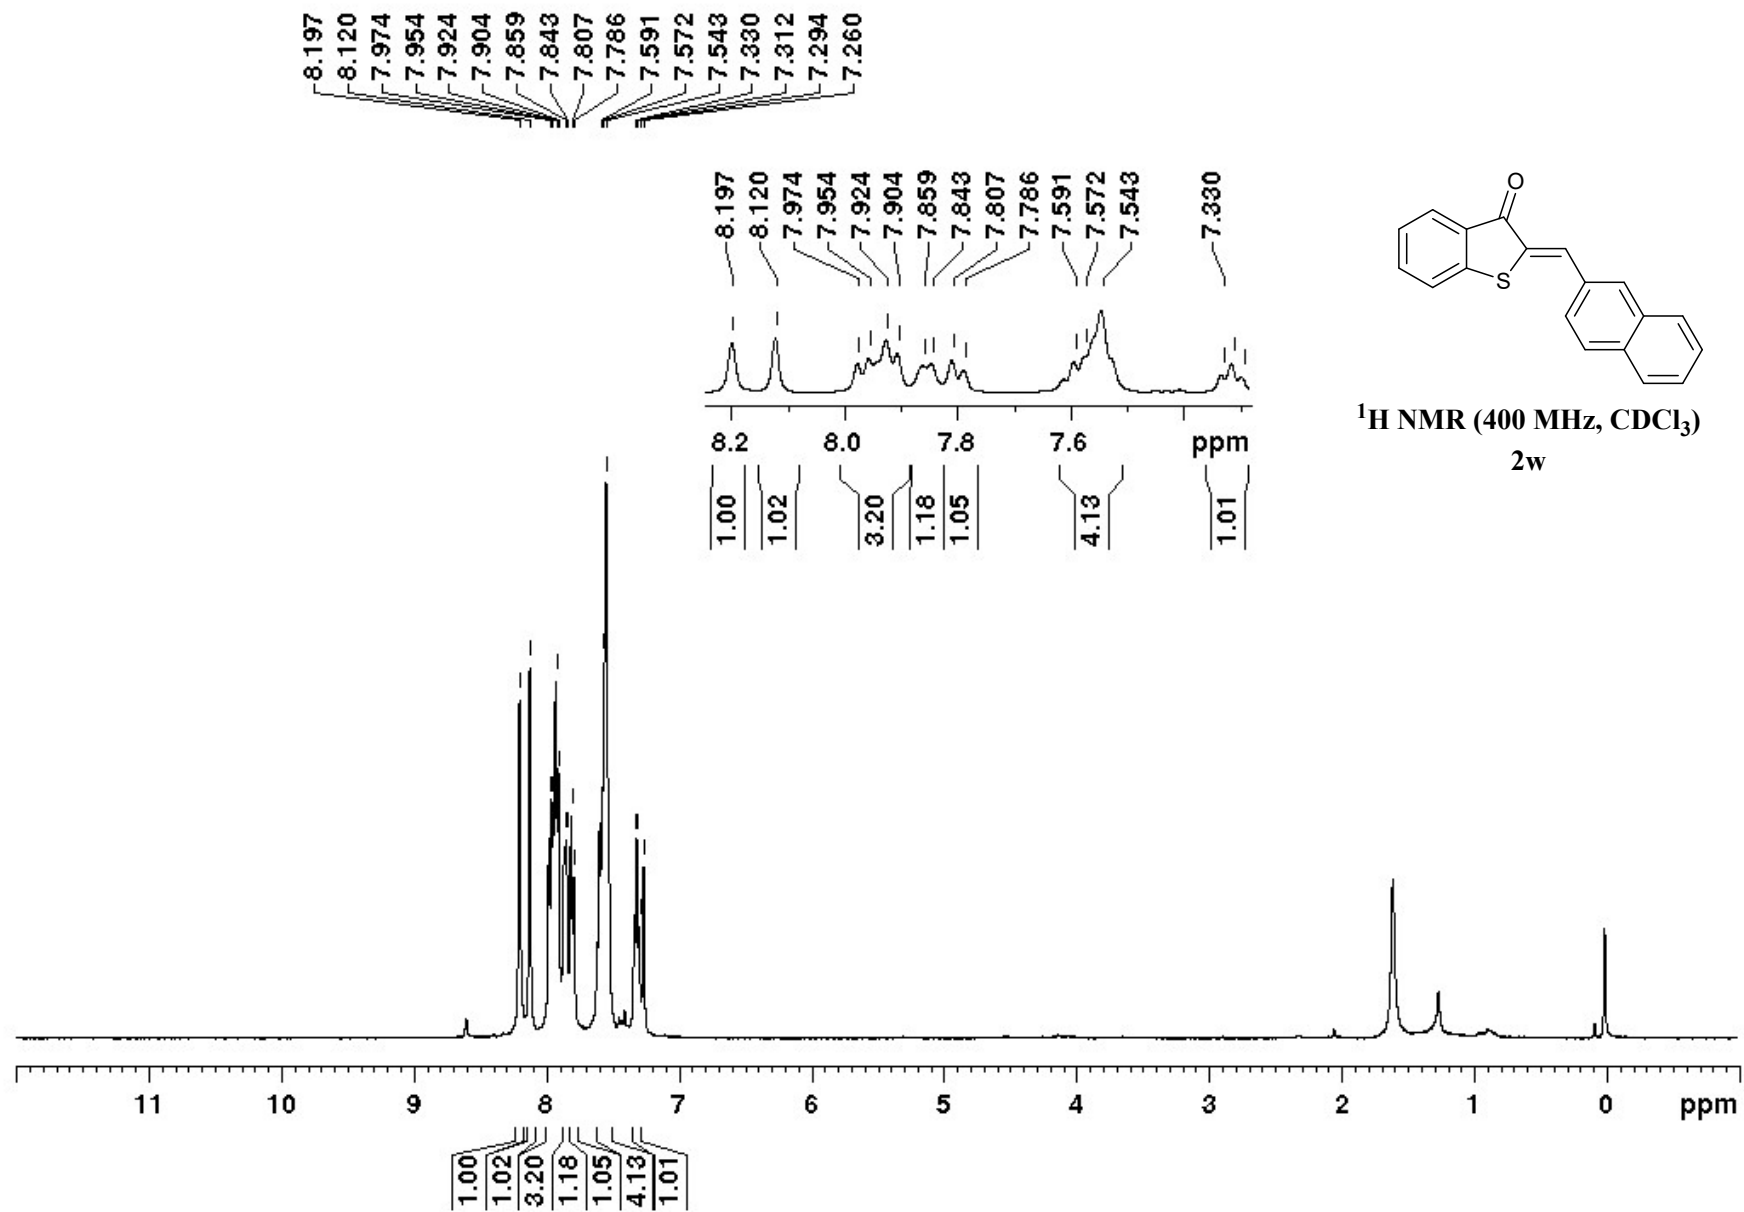

<sup>13</sup>C NMR spectrum of compound 2w

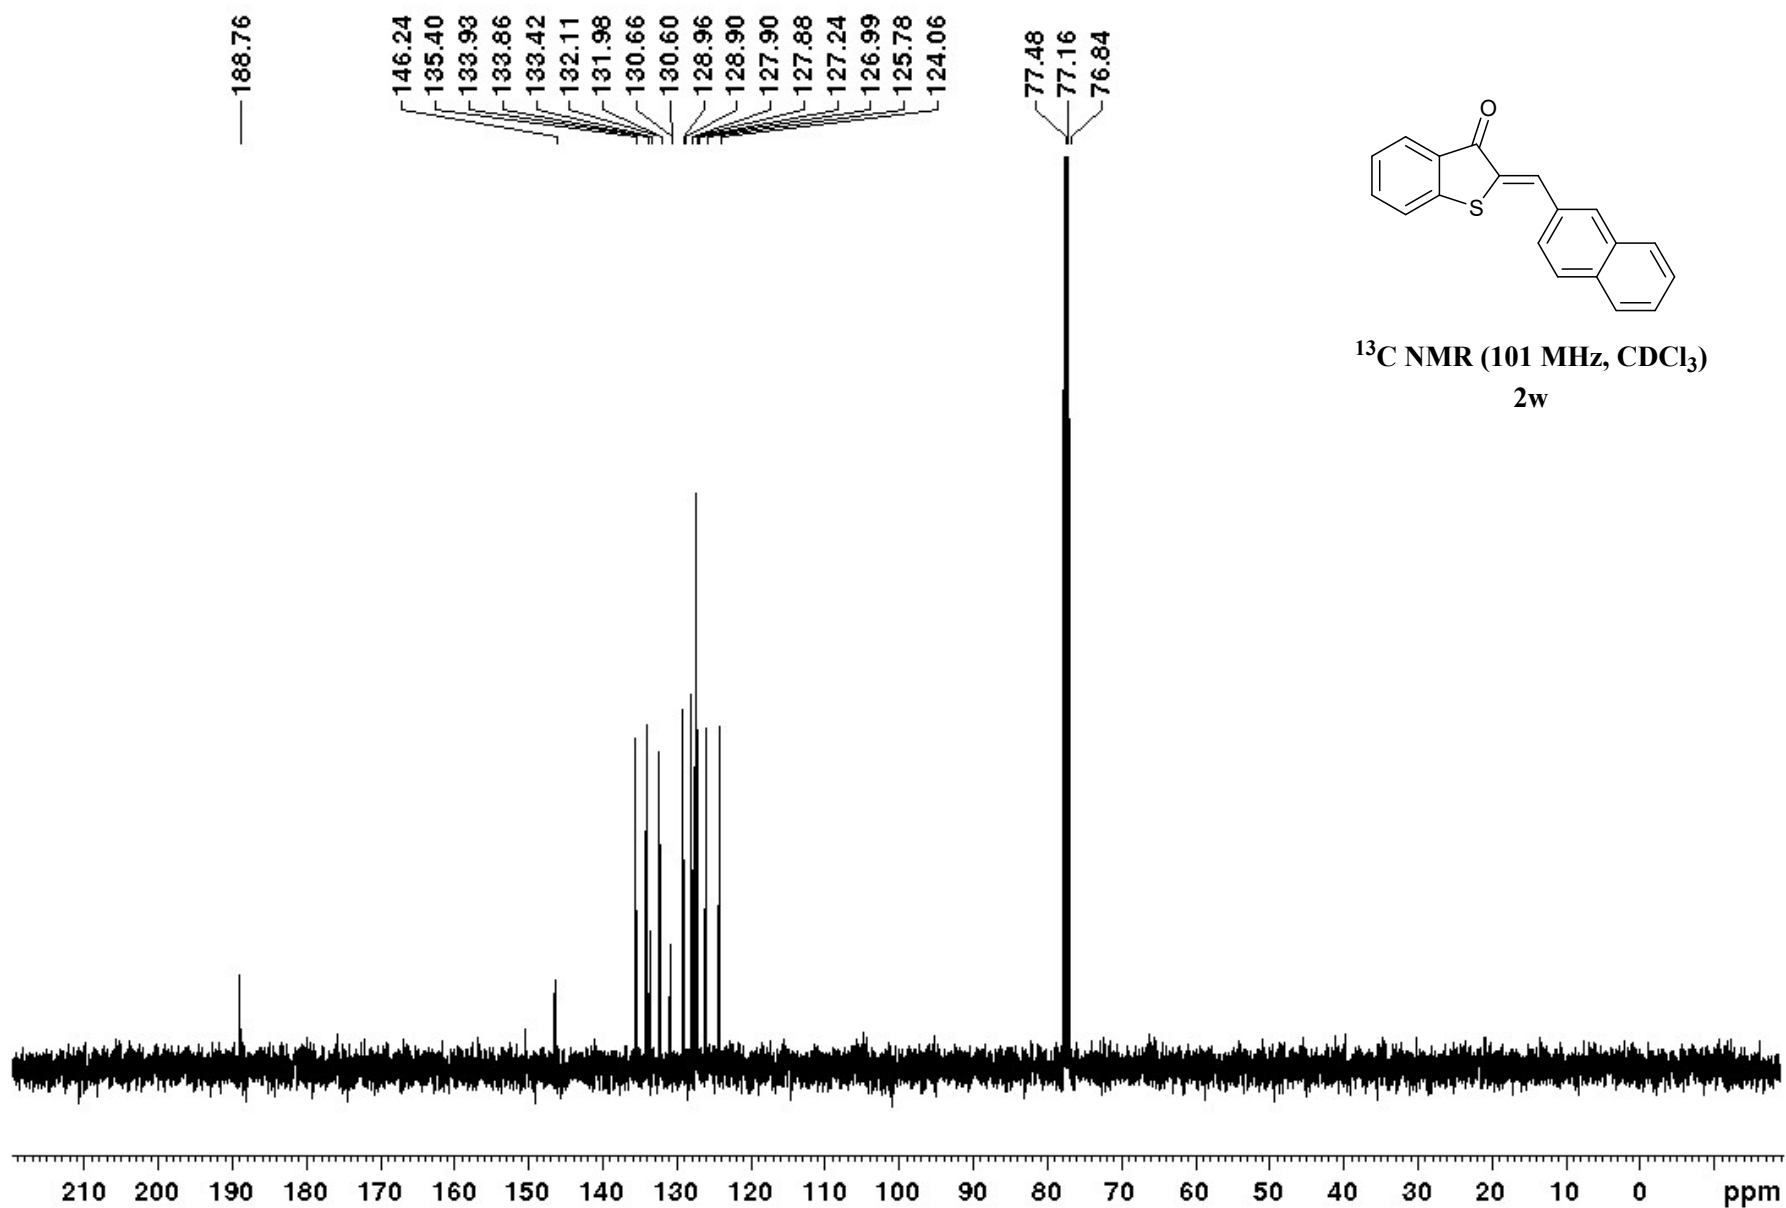

<sup>1</sup>H NMR spectrum of compound 2x

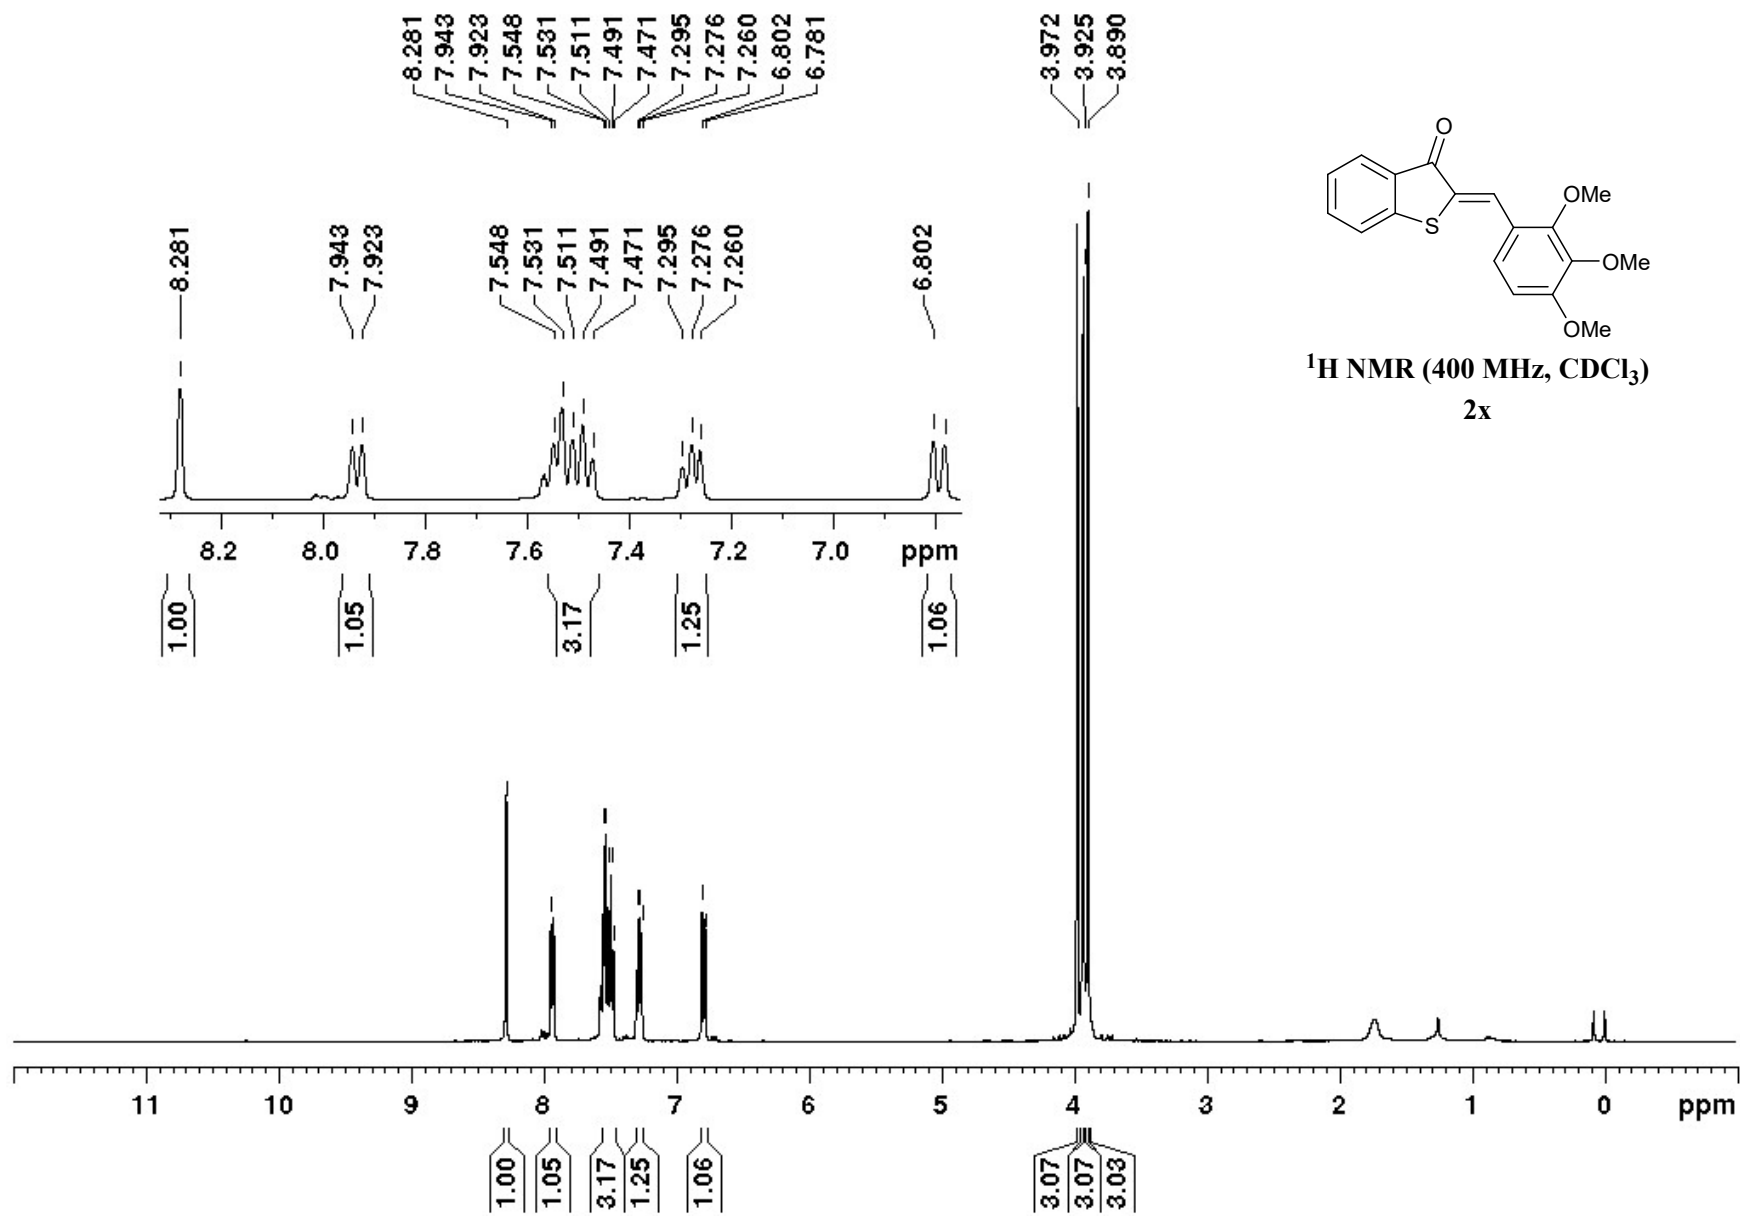

<sup>13</sup>C NMR spectrum of compound 2x

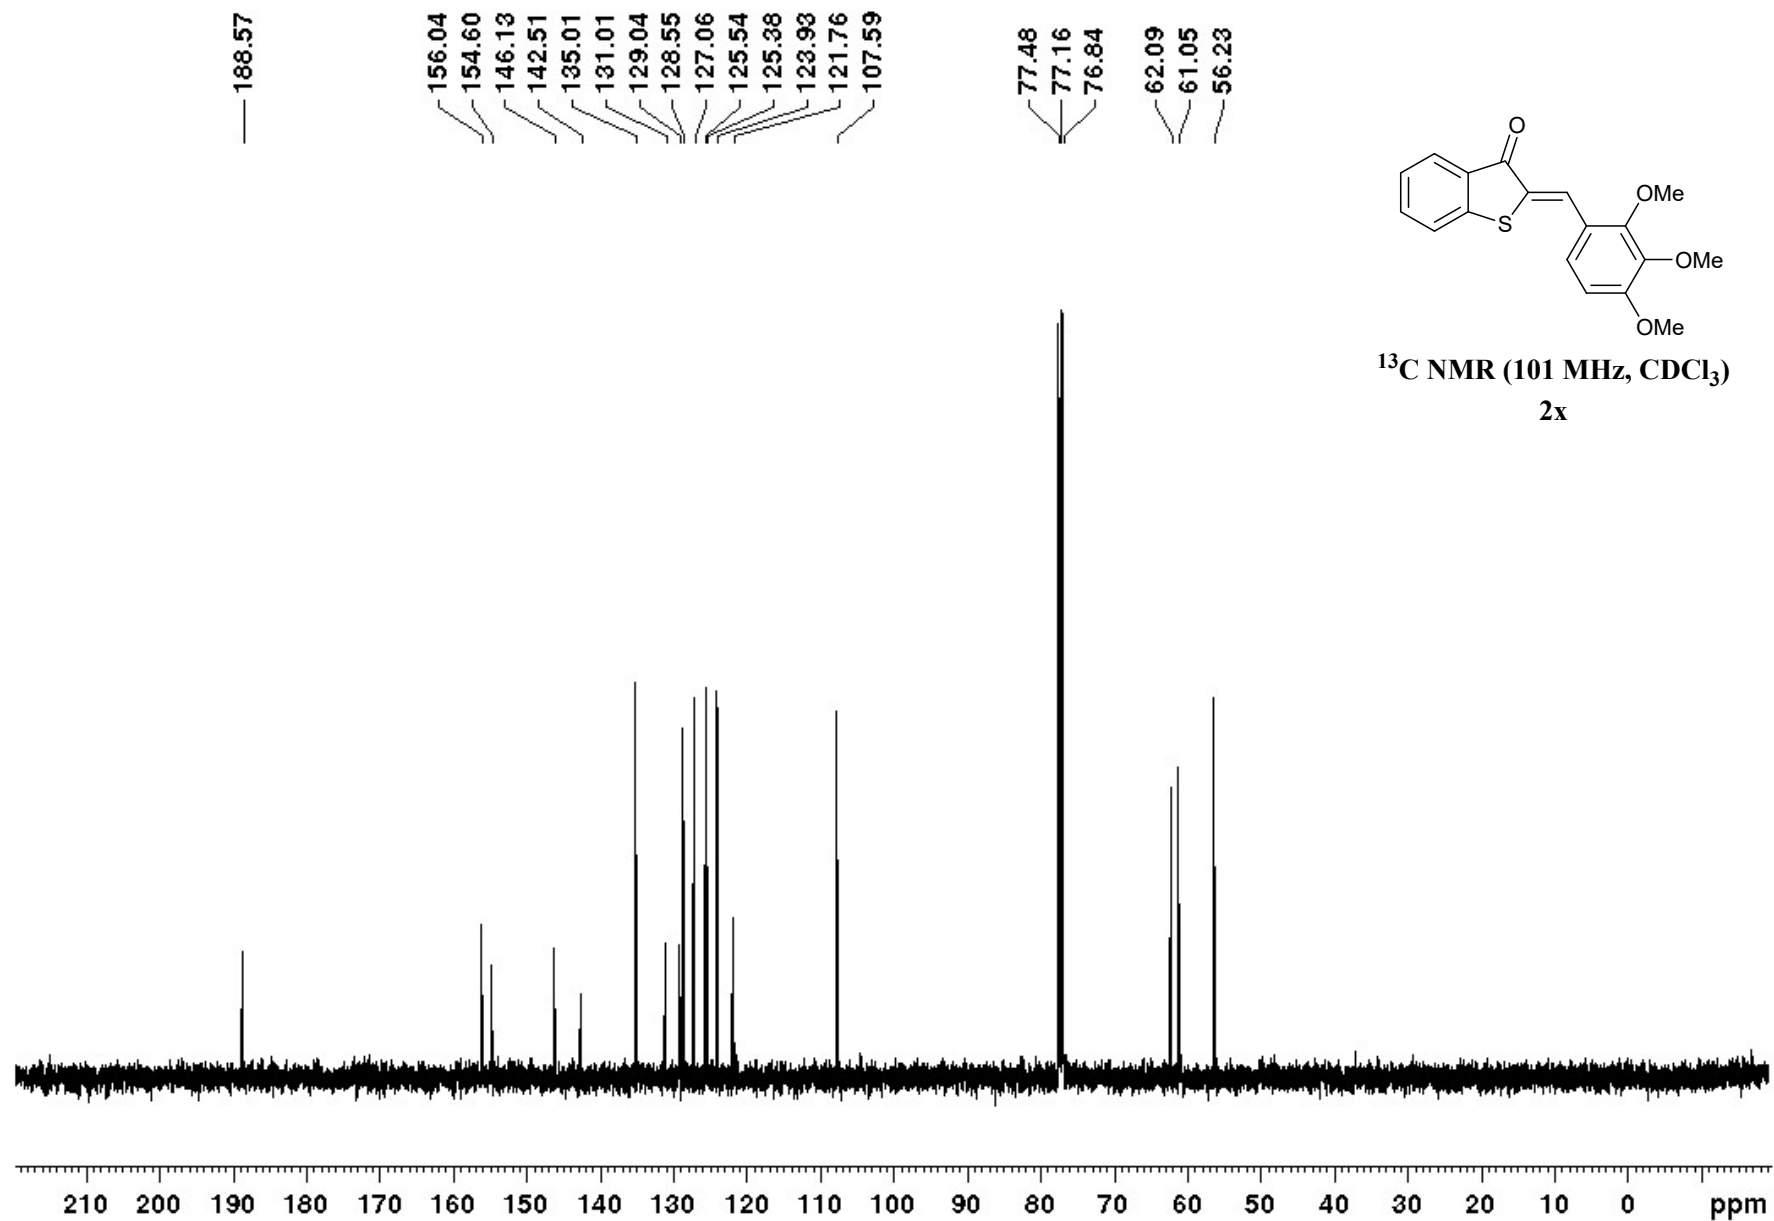



<sup>1</sup>H NMR spectrum of compound 2y

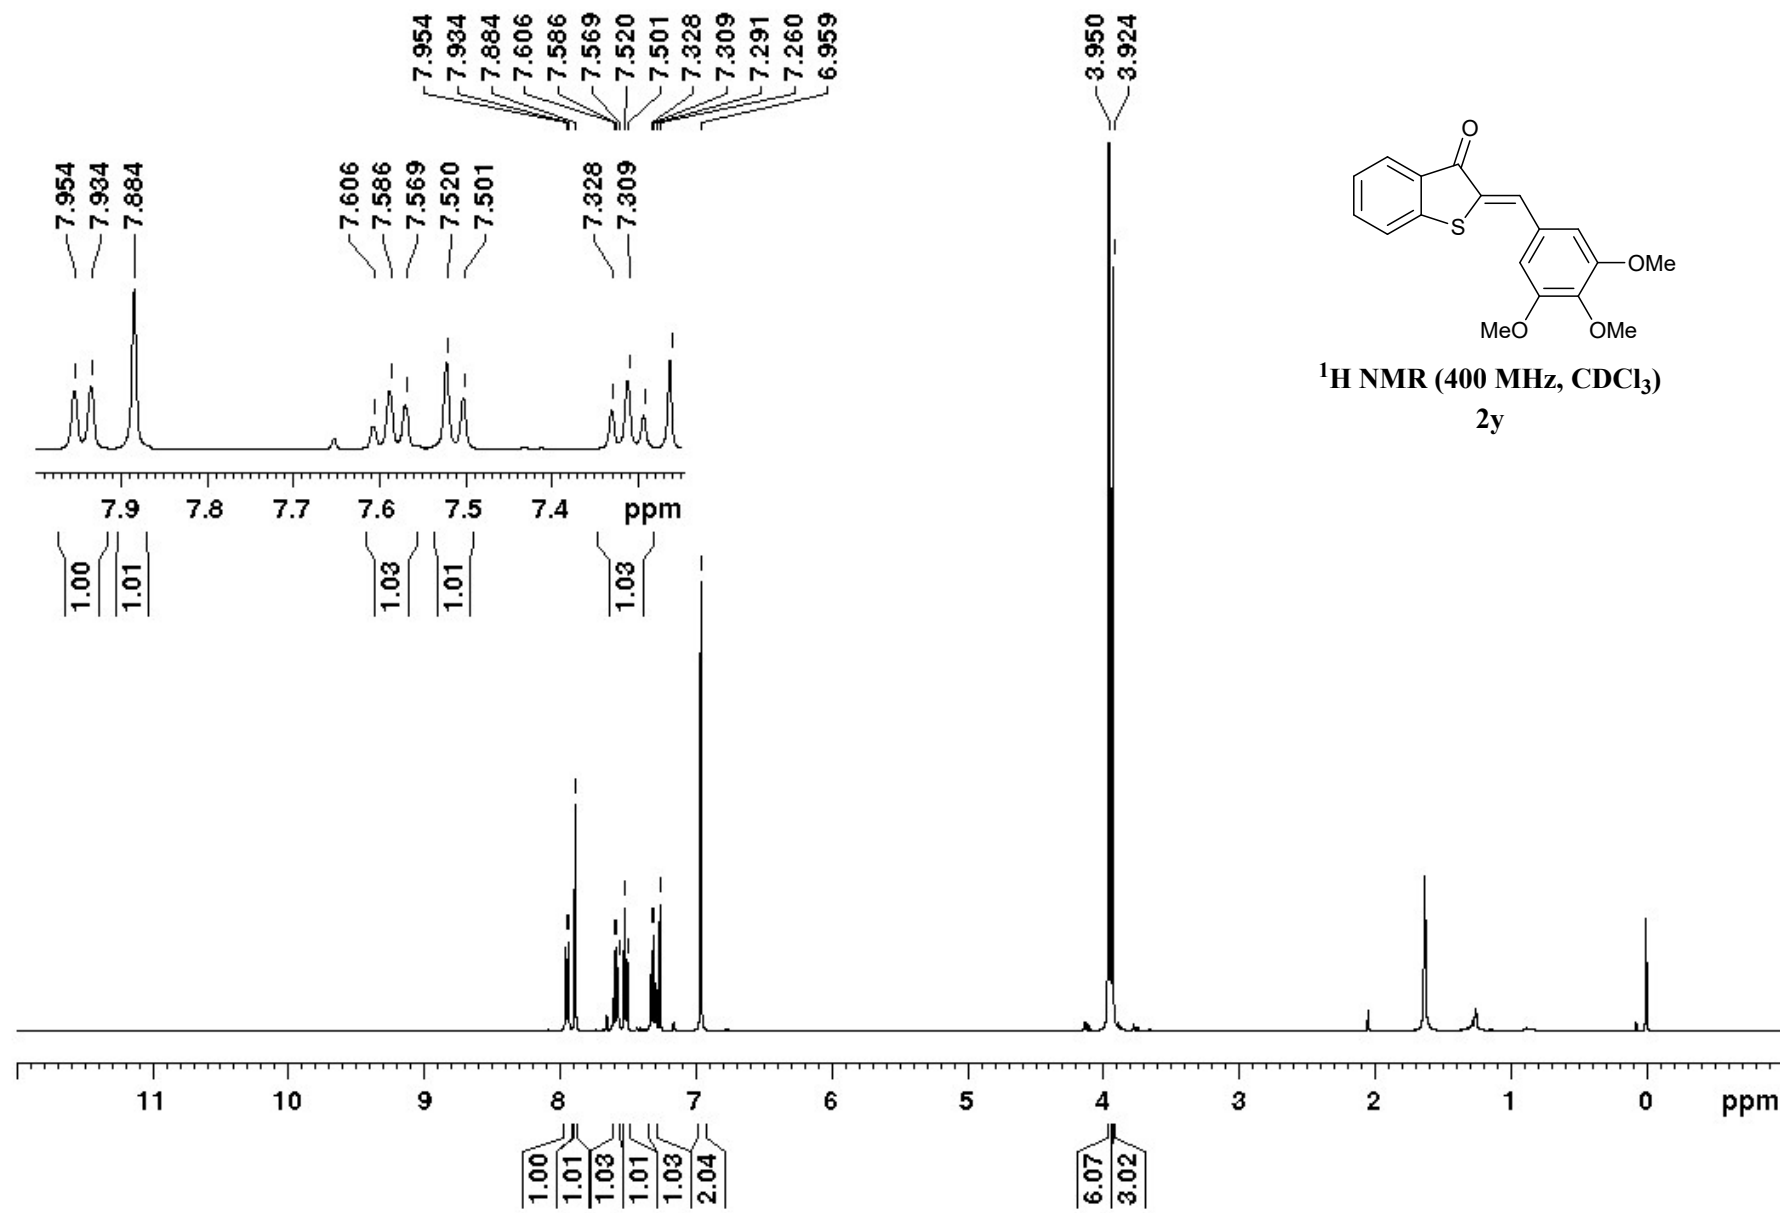

<sup>13</sup>C NMR spectrum of compound 2y

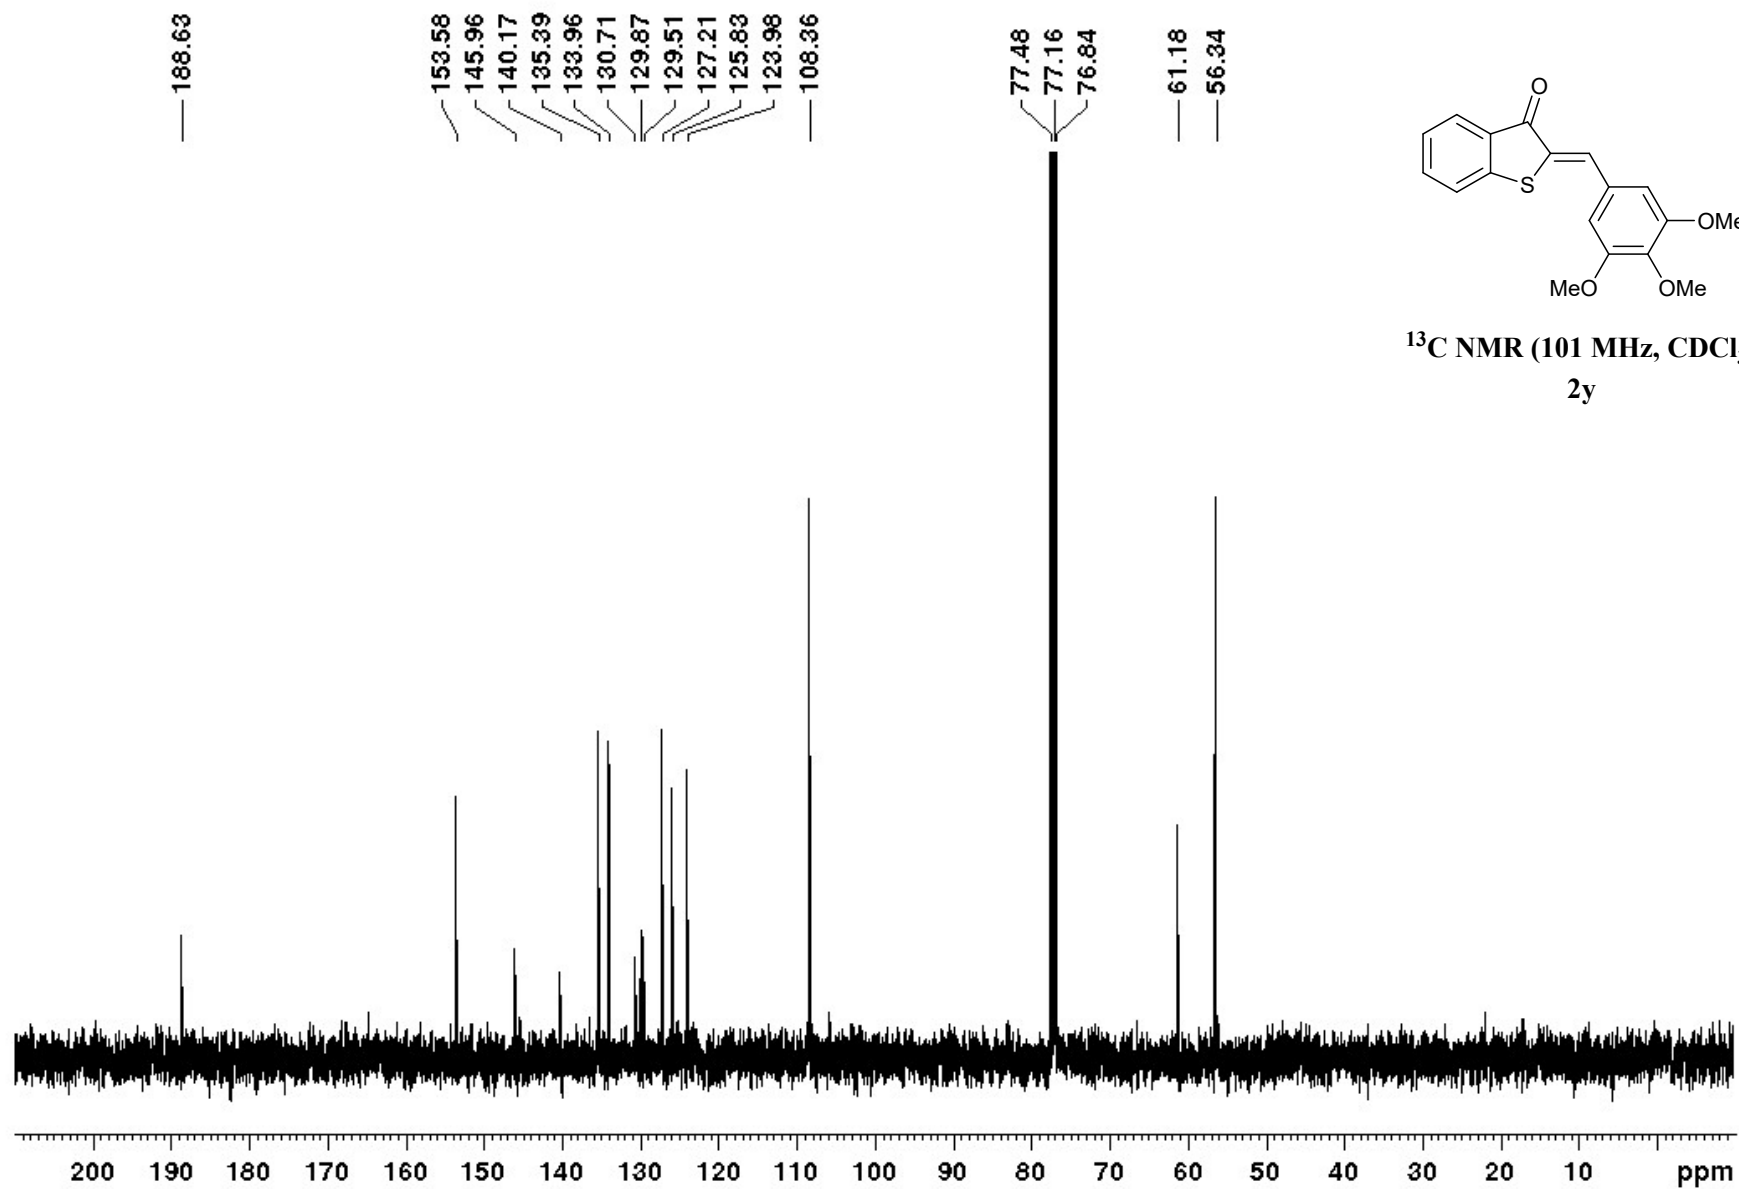

v

<sup>1</sup>H NMR spectrum of compound 2z

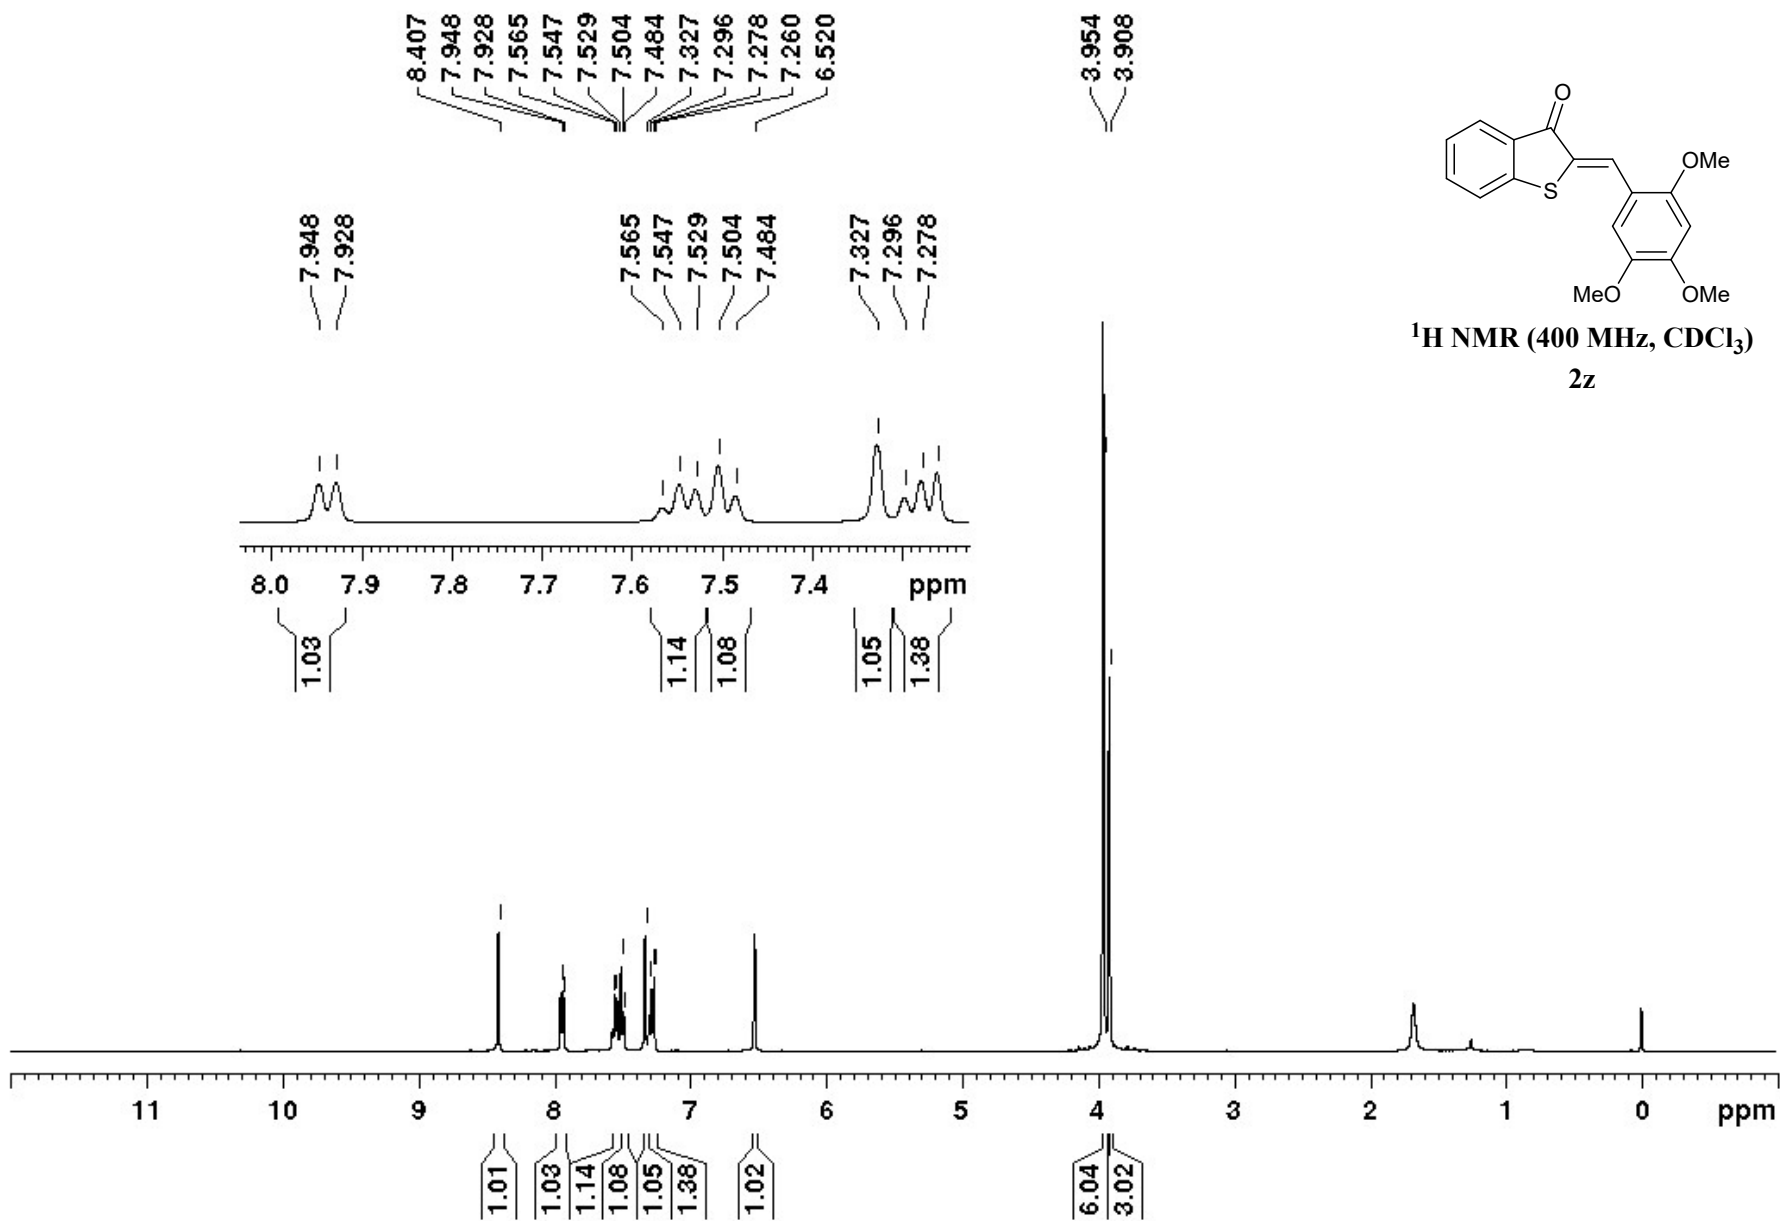

<sup>13</sup>C NMR spectrum of compound 2z

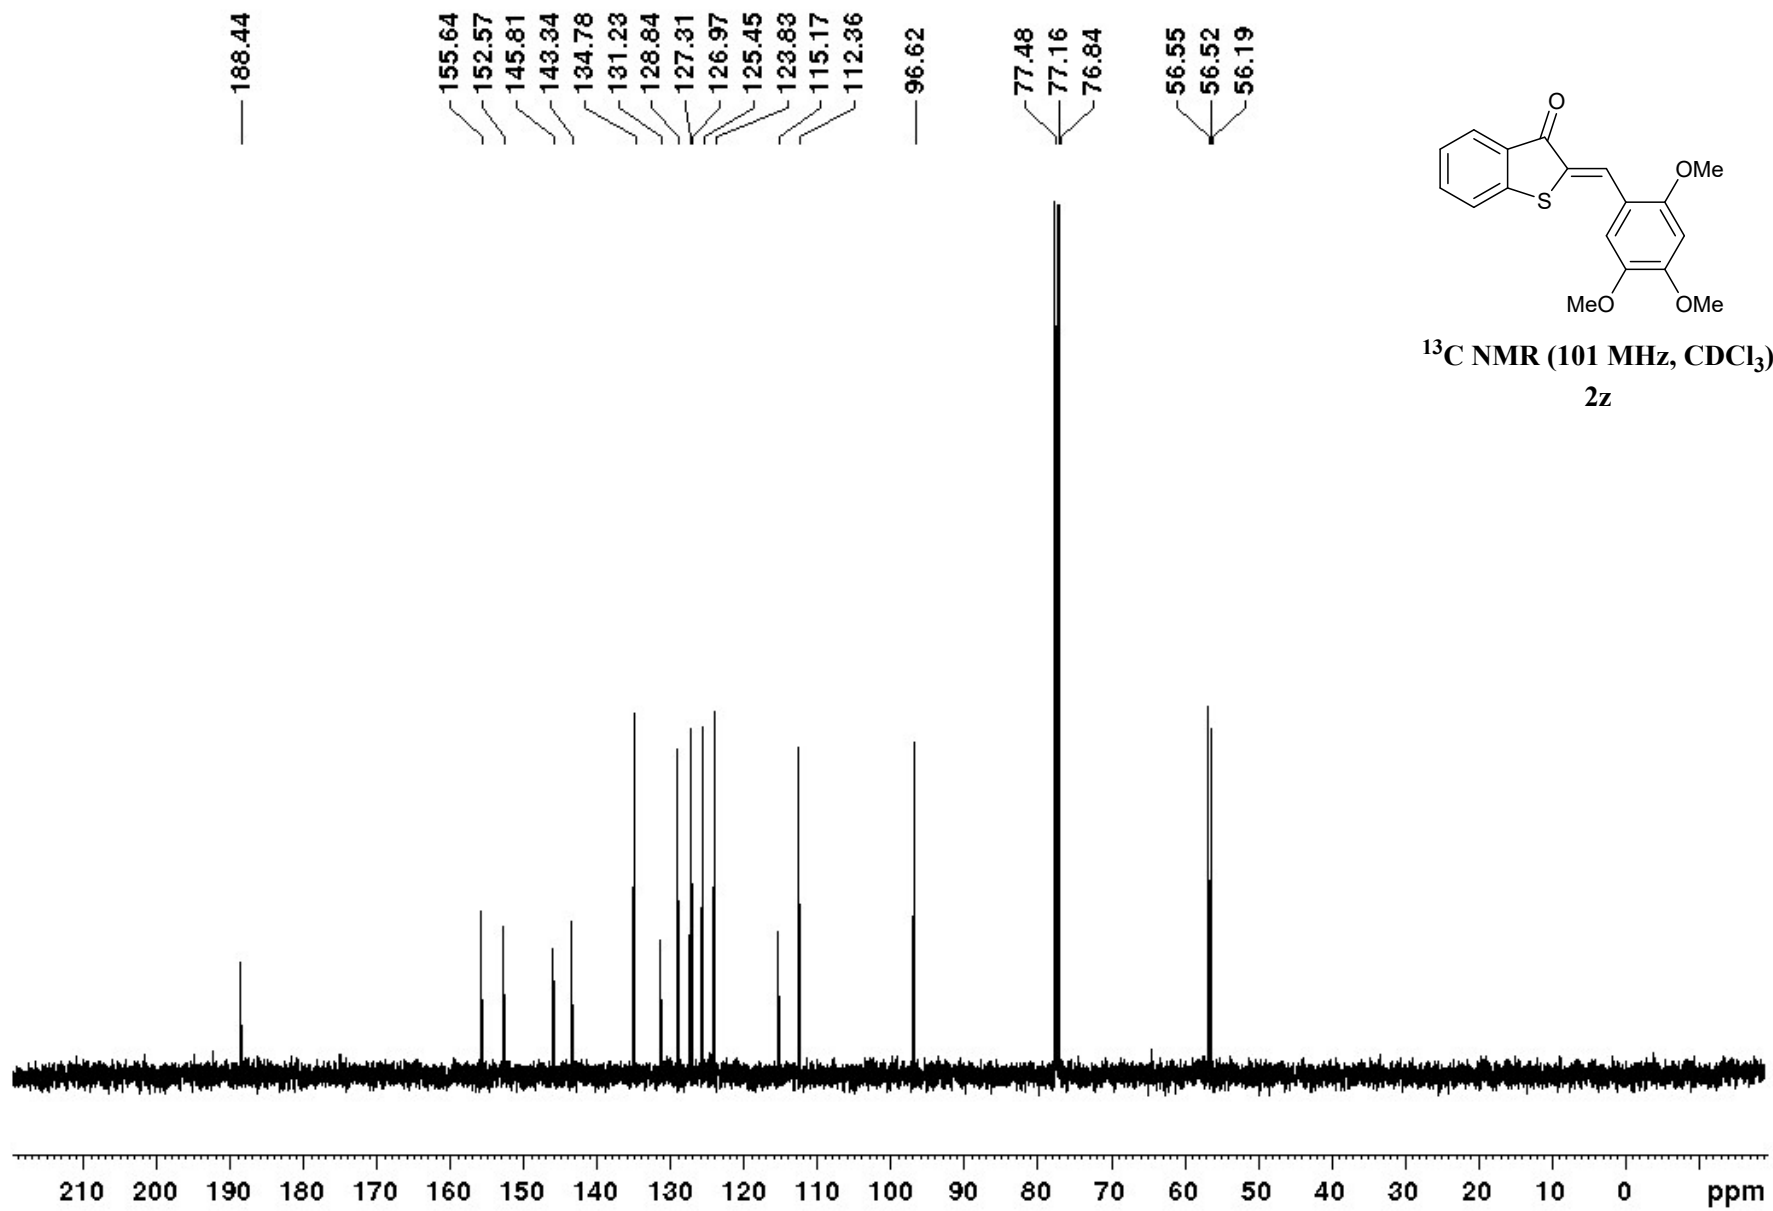

<sup>1</sup>H NMR spectrum of compound 2aa

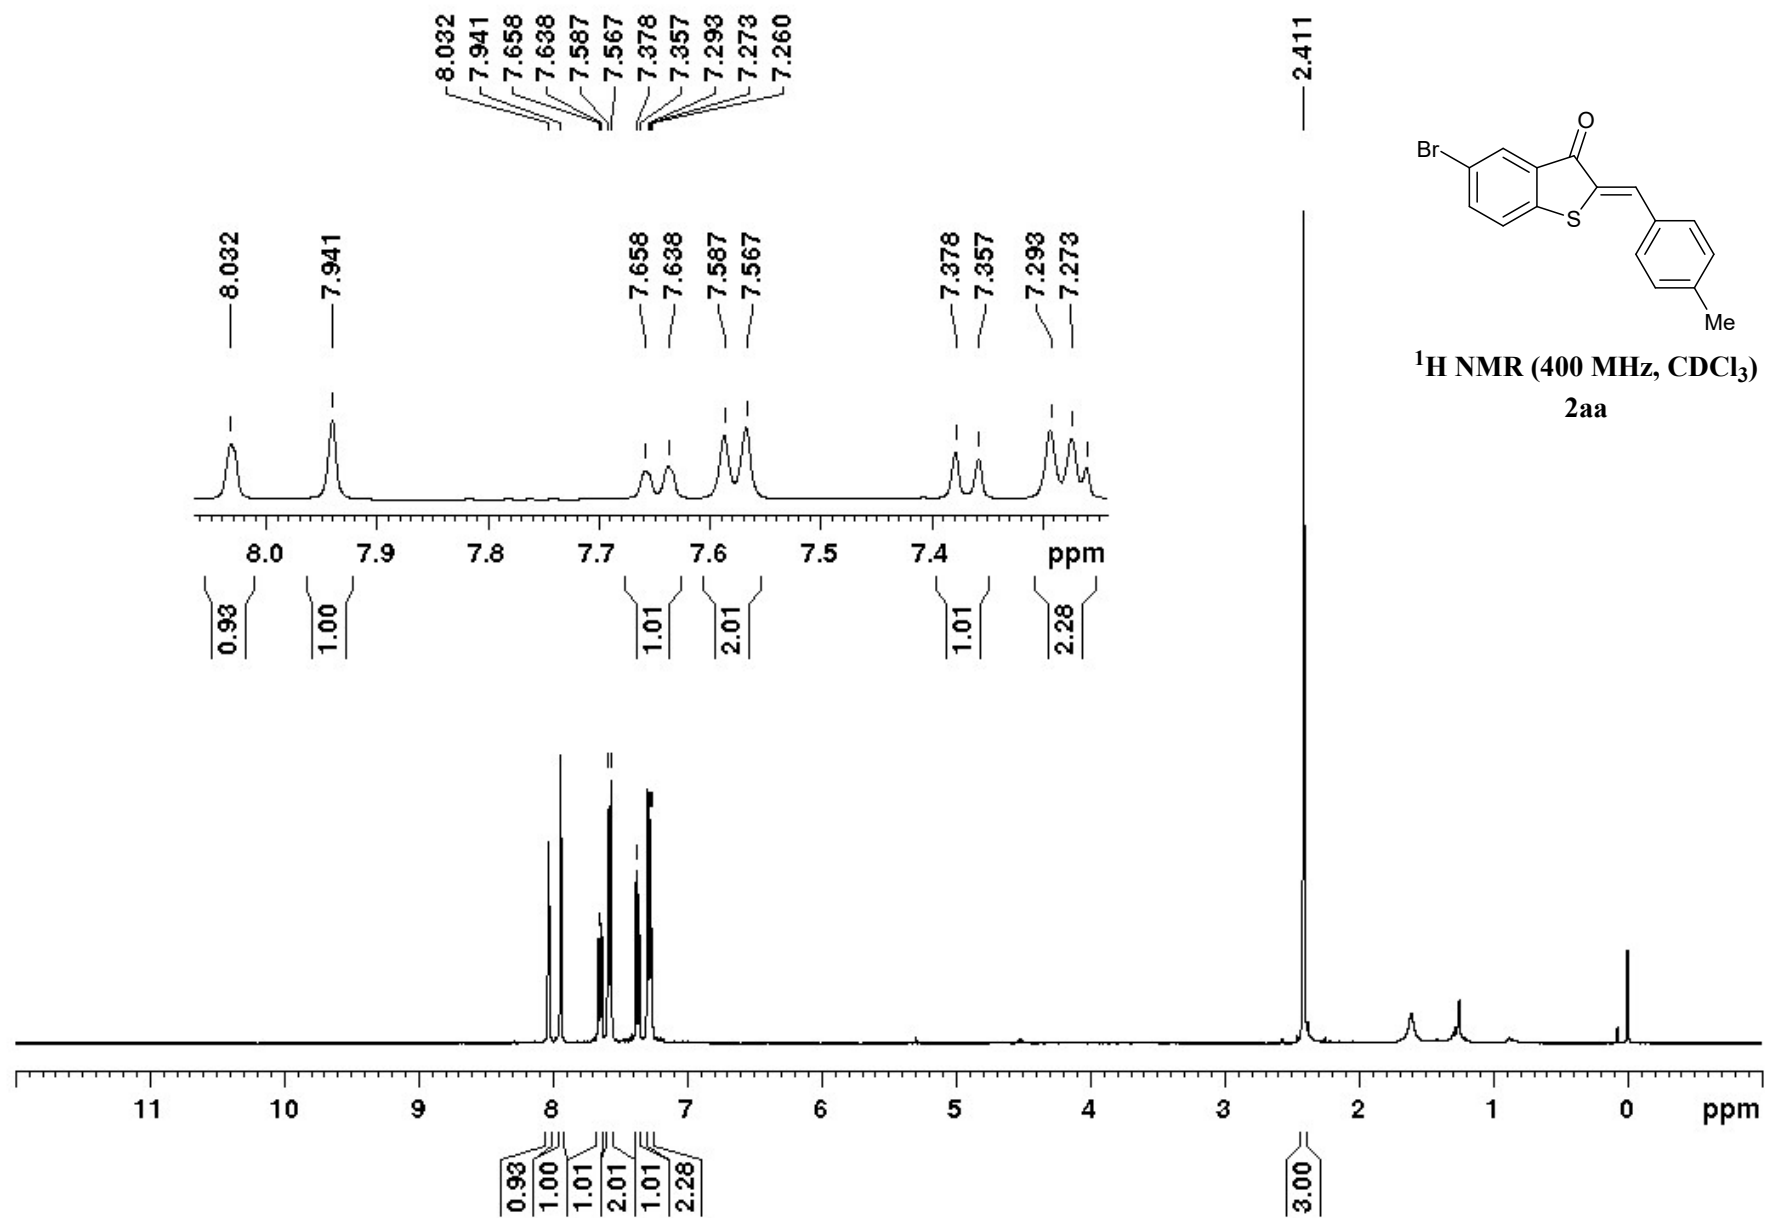

<sup>13</sup>C NMR spectrum of compound 2aa

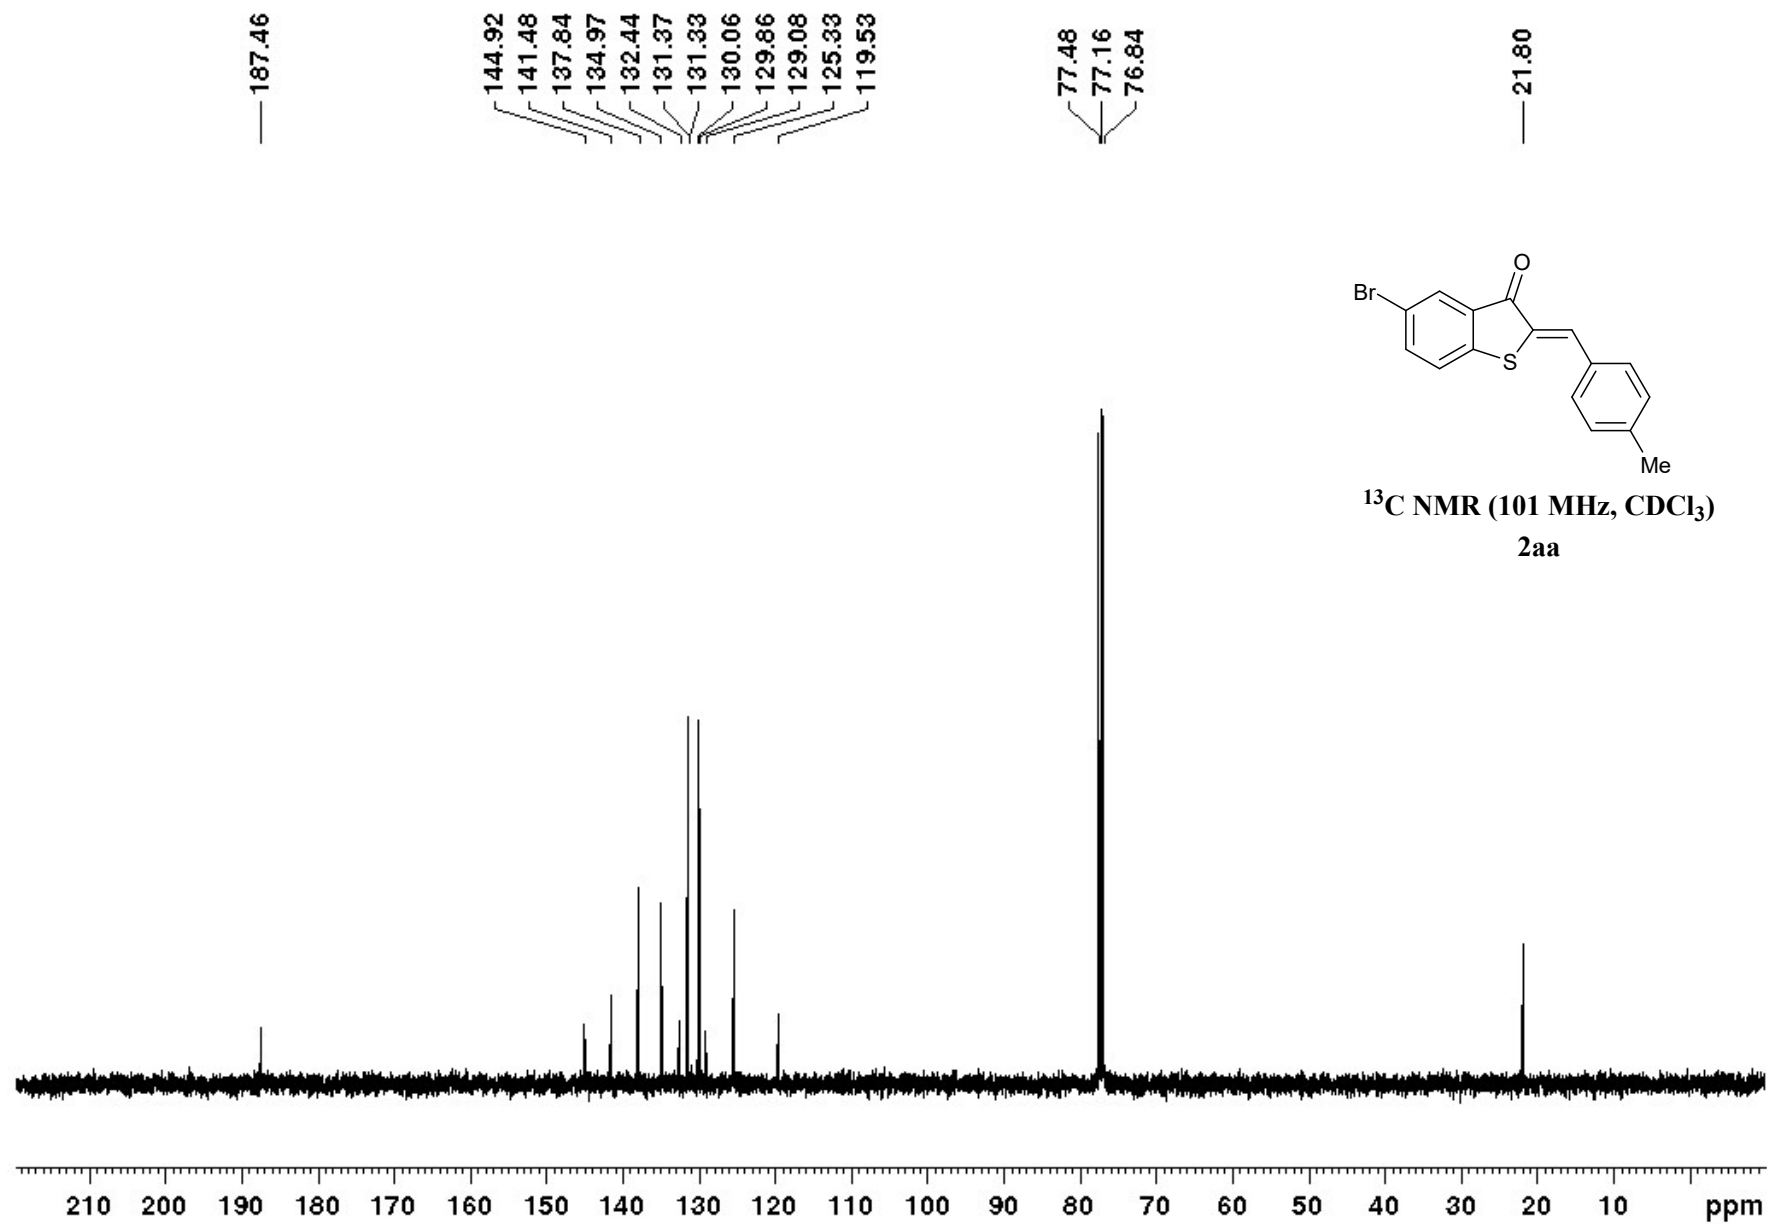

<sup>1</sup>H NMR spectrum of compound 2ab

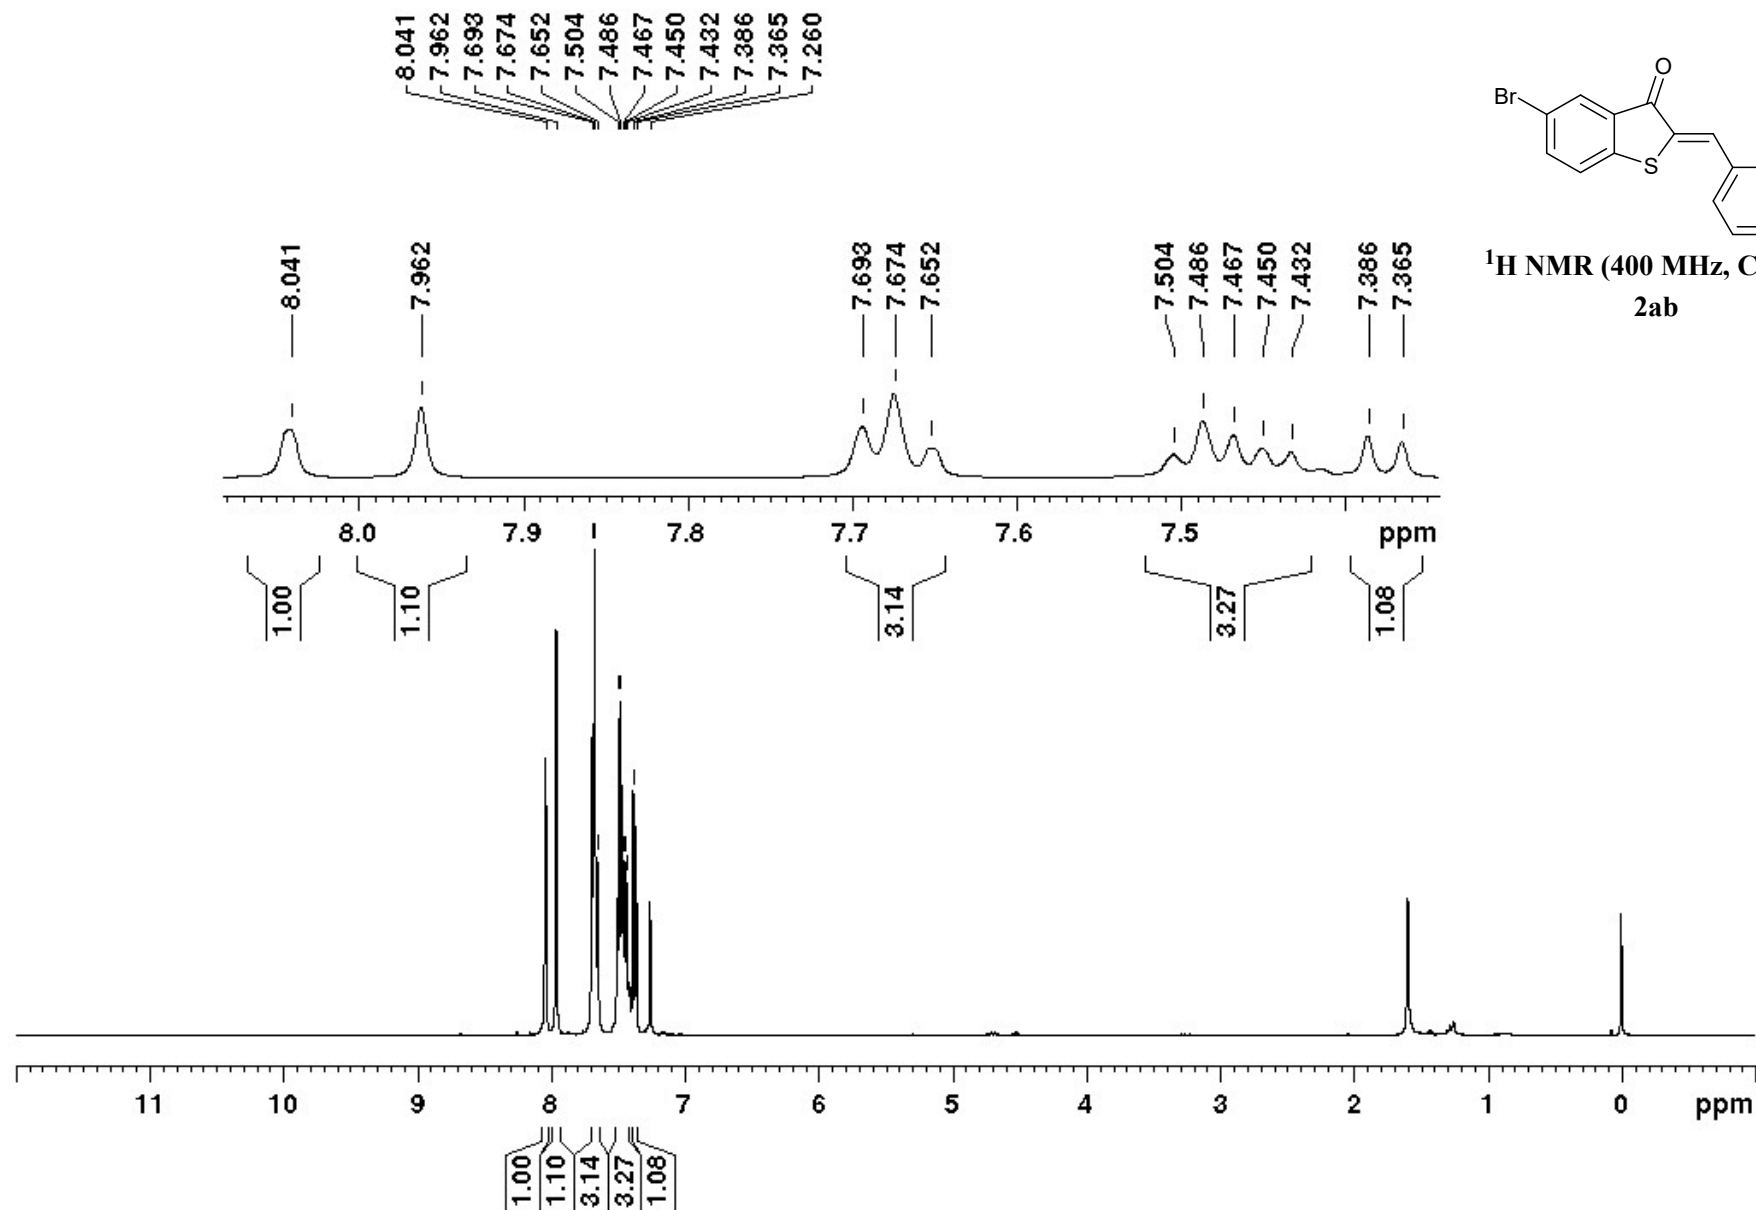

<sup>13</sup>C NMR spectrum of compound 2ab

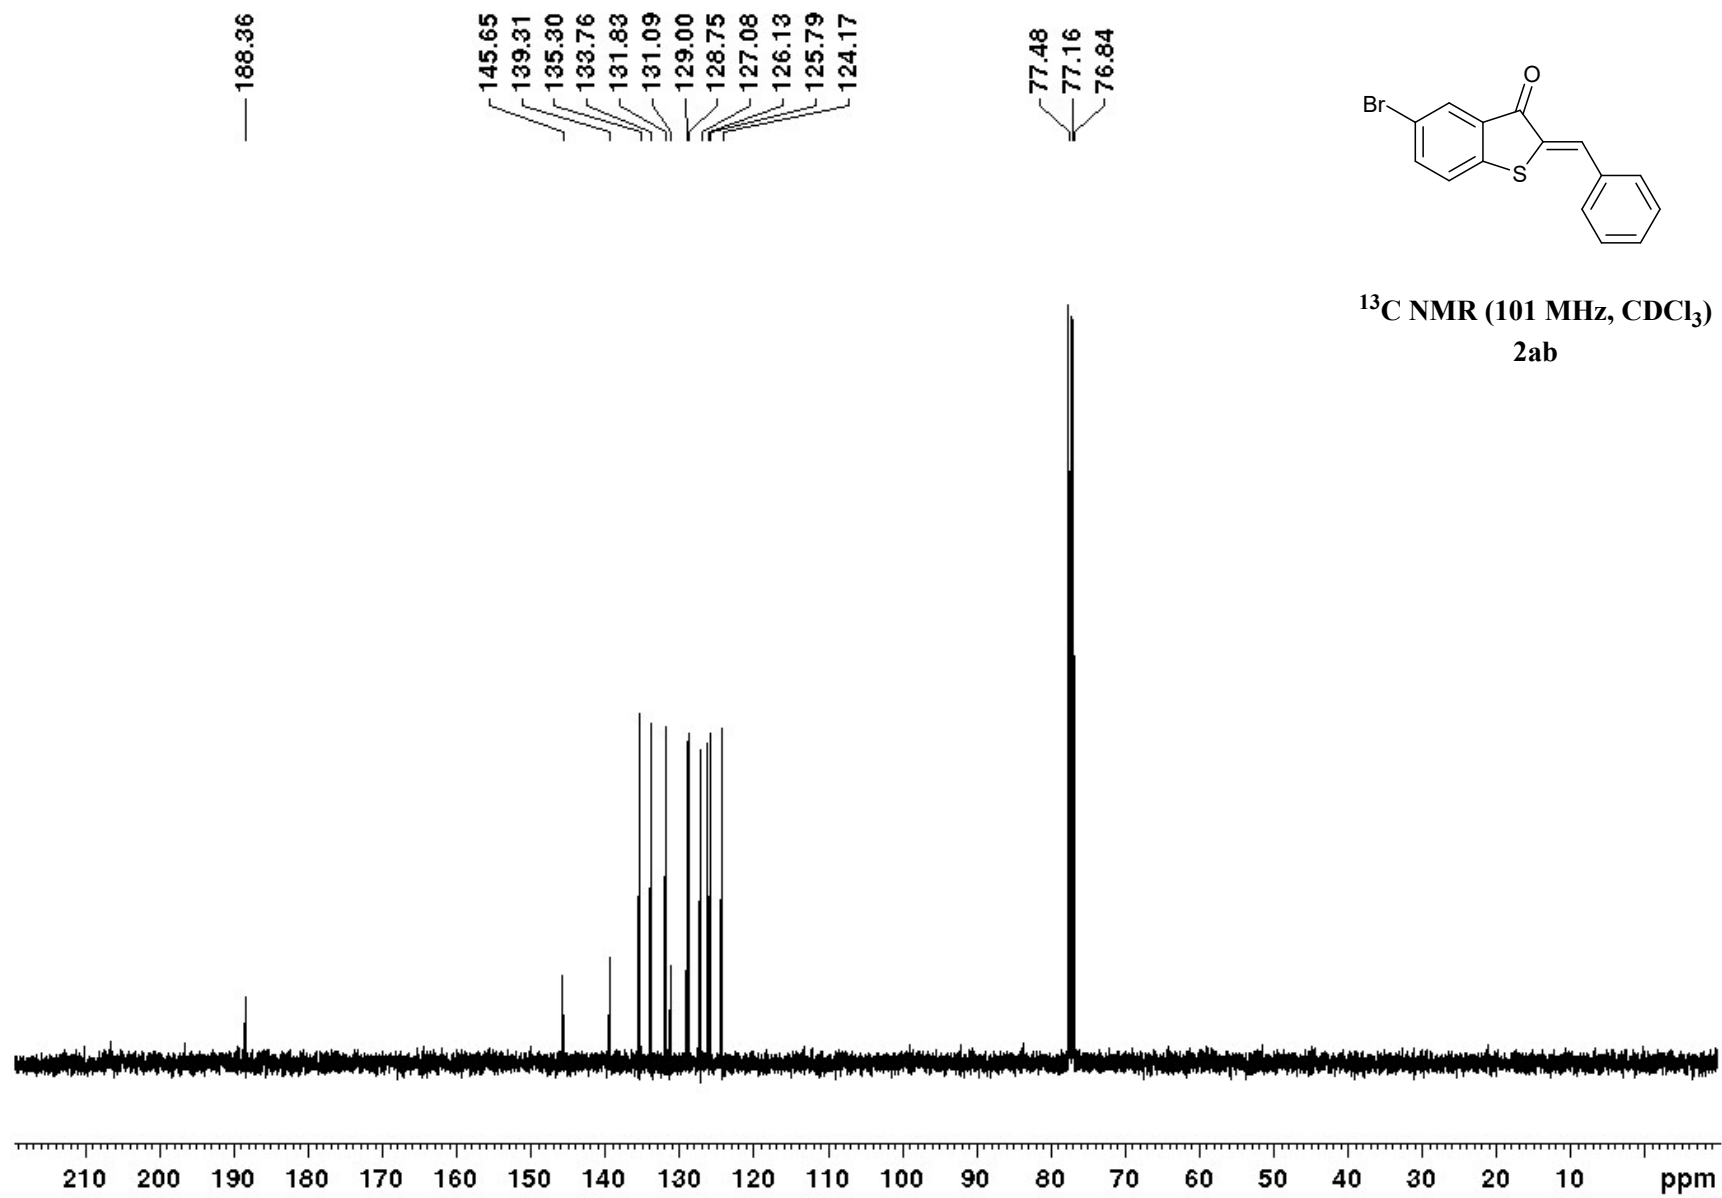



<sup>1</sup>H NMR spectrum of compound 2ac

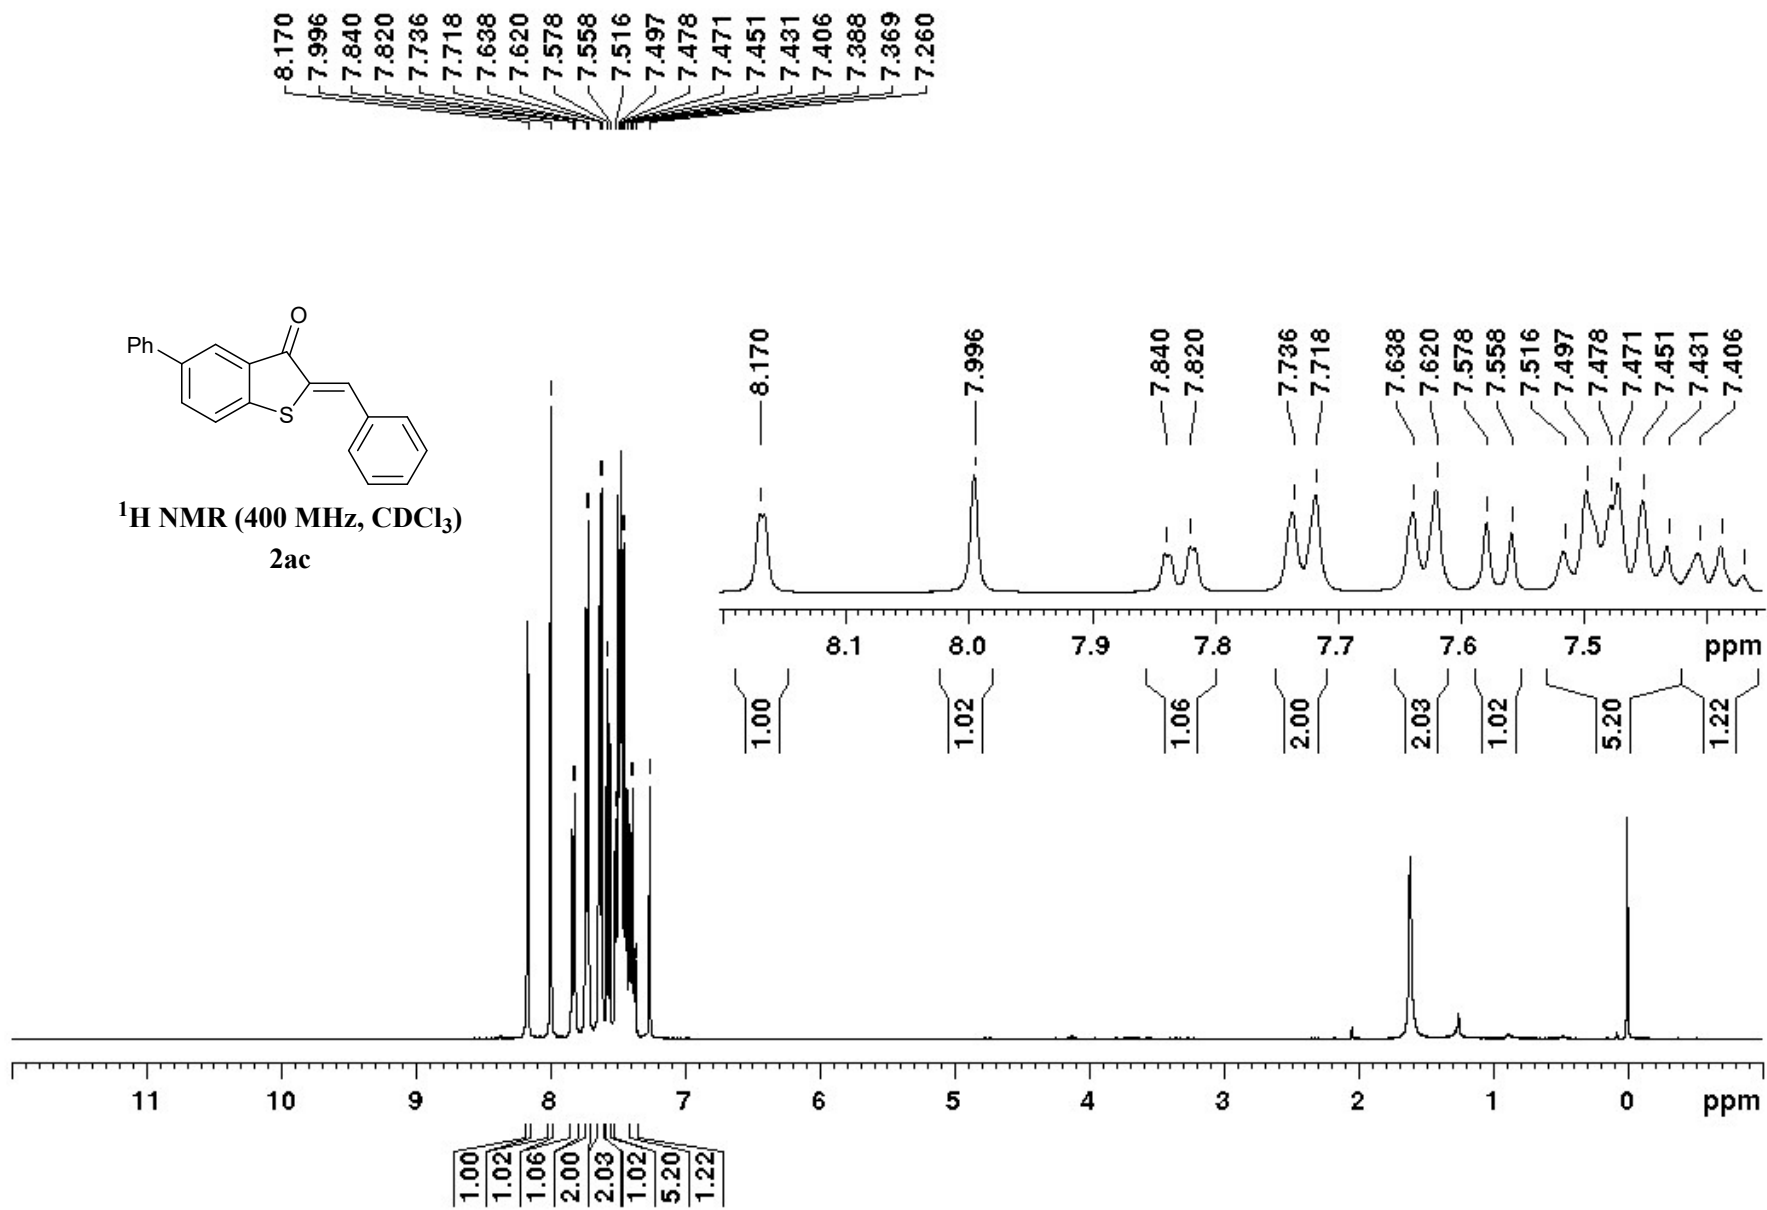

<sup>13</sup>C NMR spectrum of compound 2ac

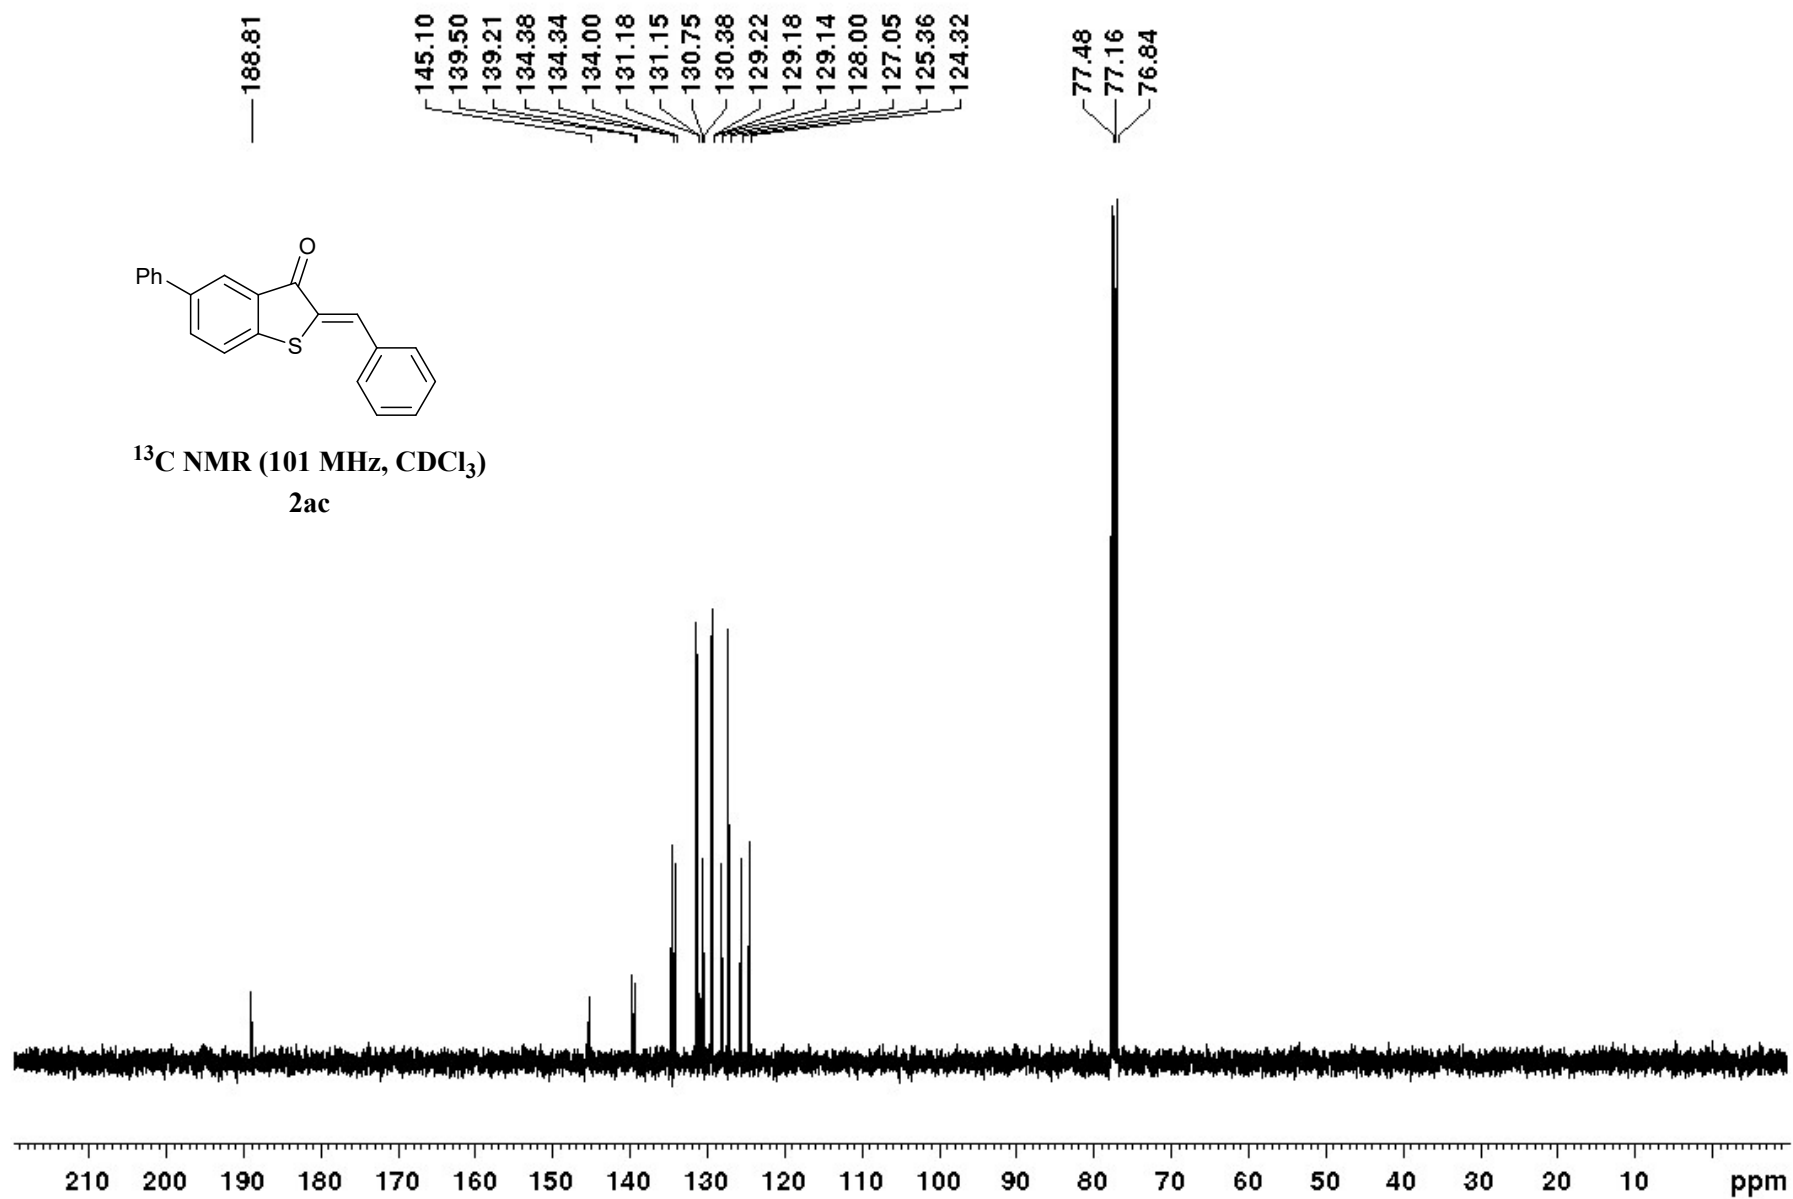

<sup>1</sup>H NMR spectrum of compound 2ad

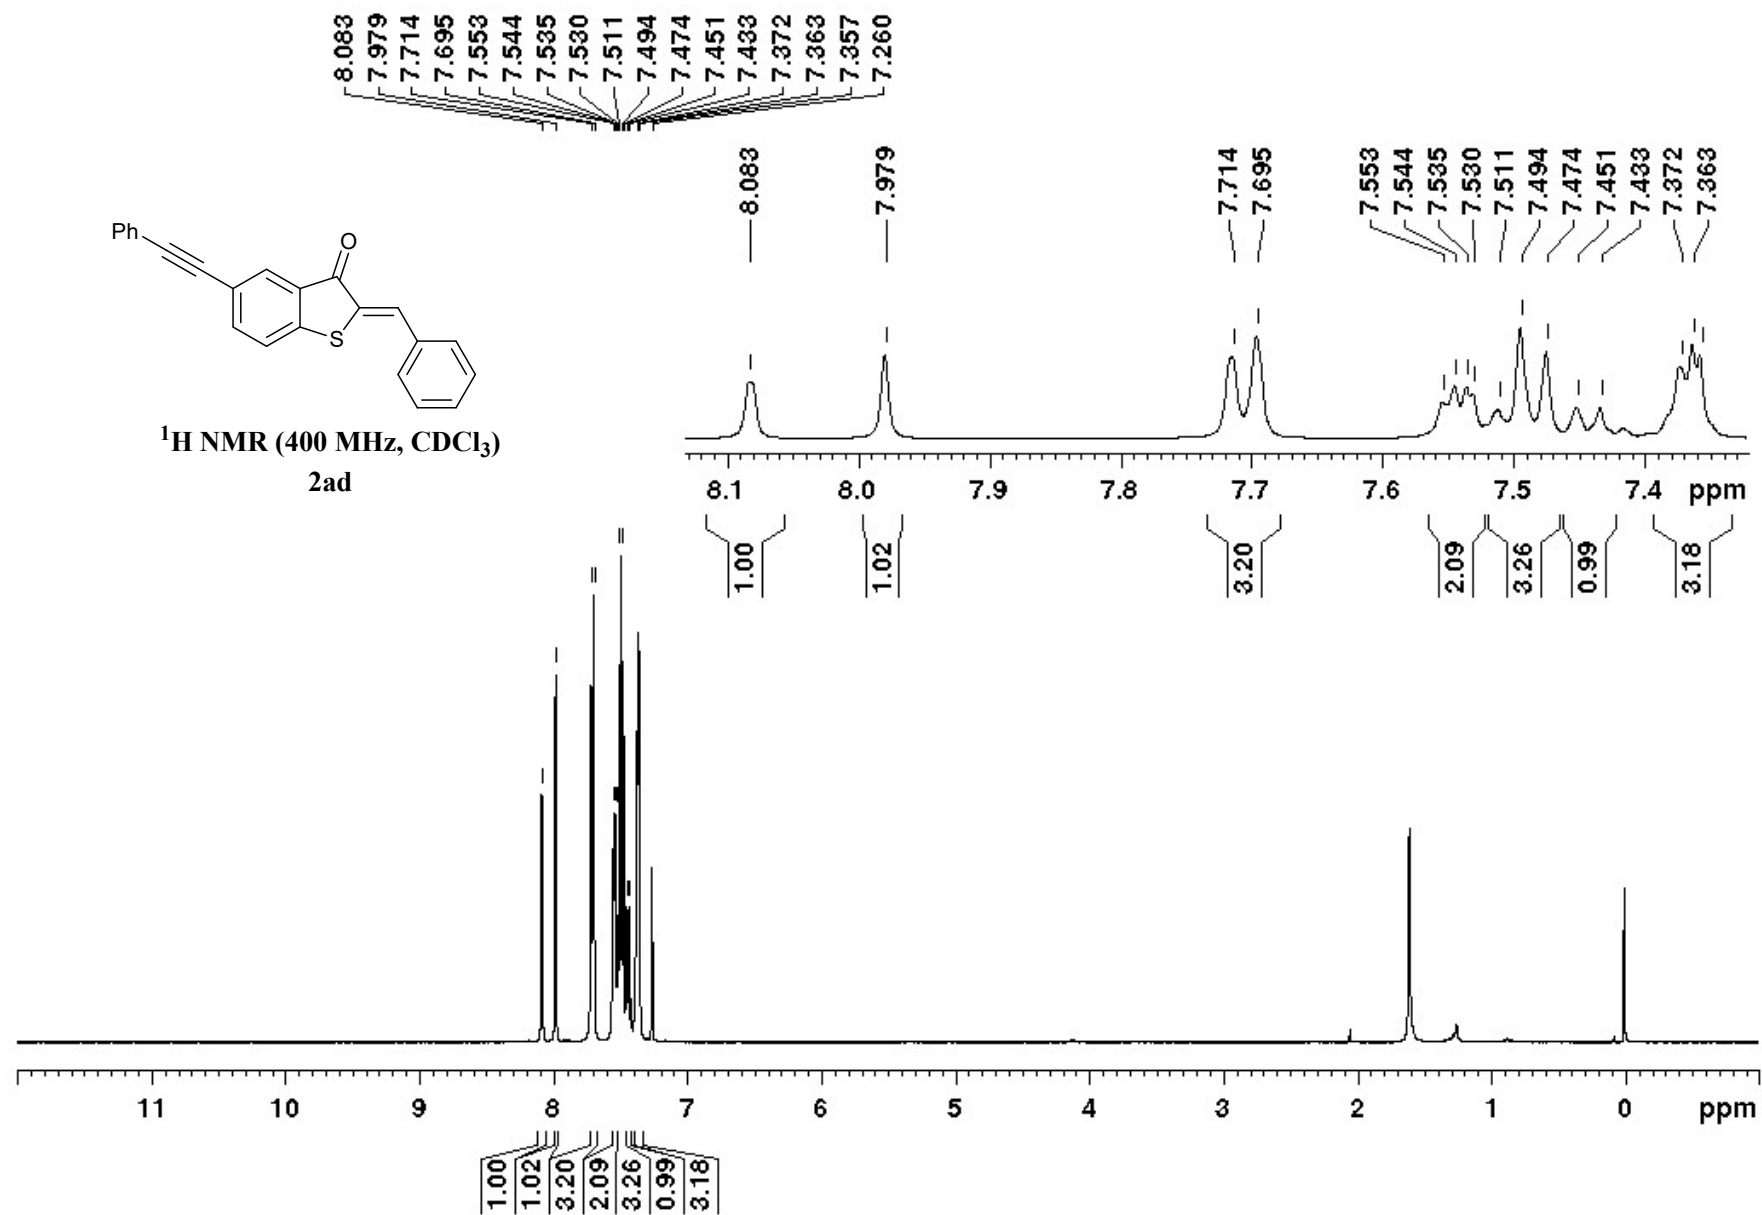

<sup>13</sup>C NMR spectrum of compound 2ad

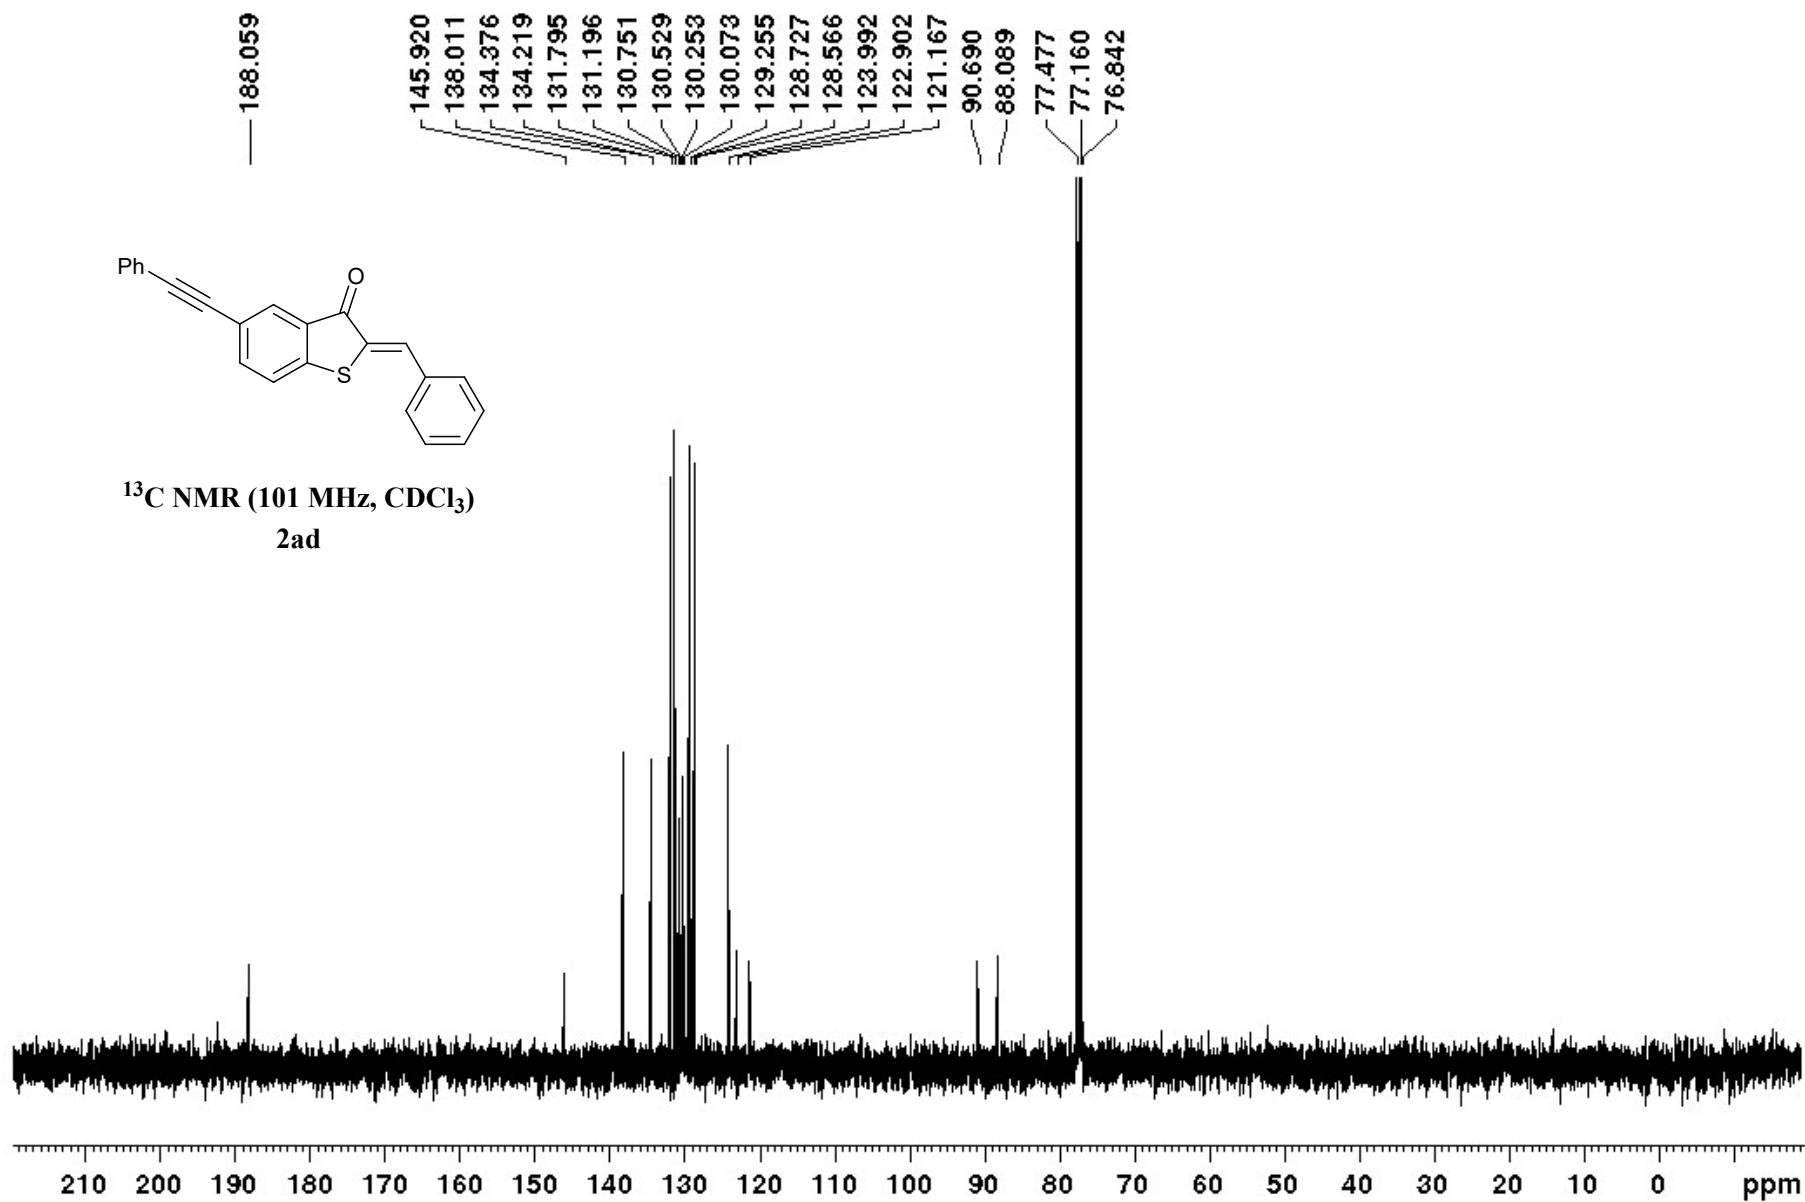

<sup>1</sup>H NMR spectrum of compound 2ae

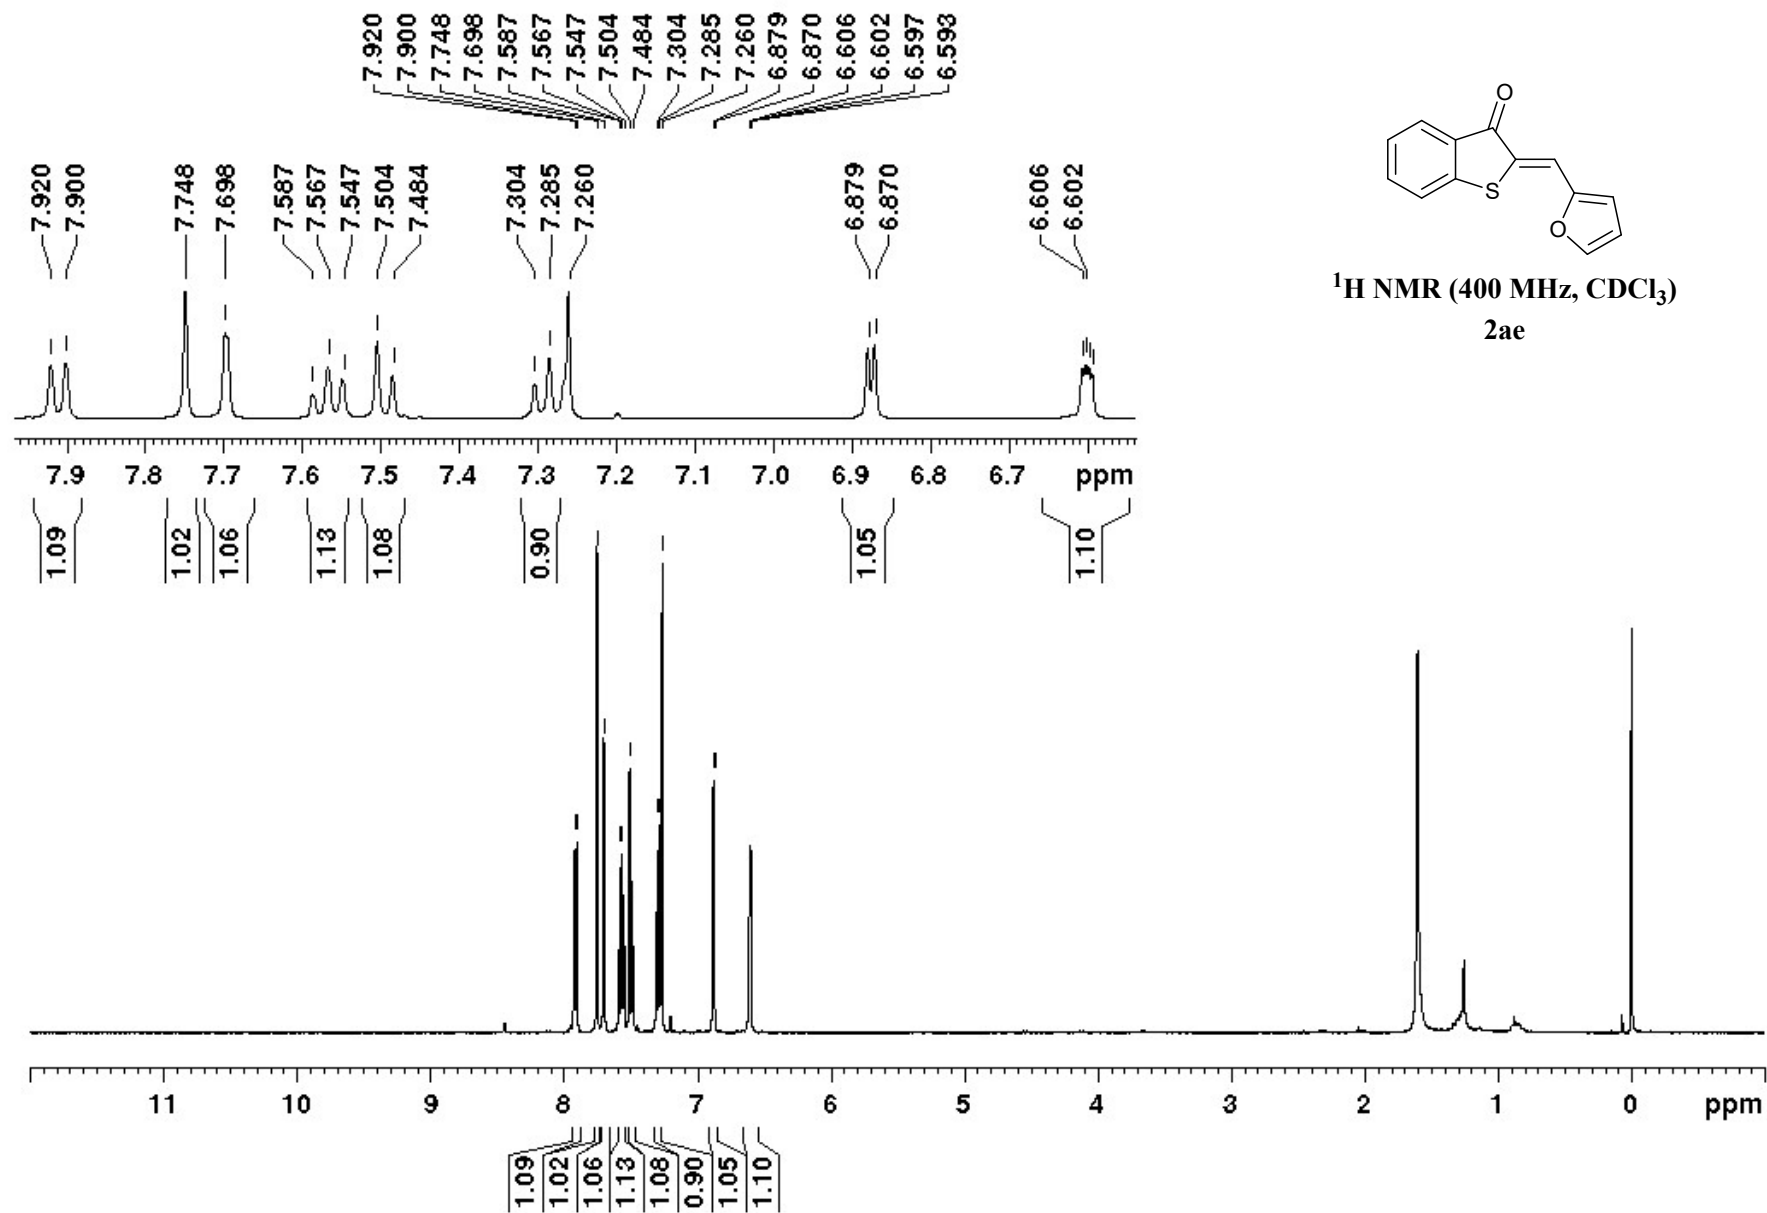

<sup>1</sup>H NMR (400 MHz, CDCl<sub>3</sub>)  
2ae

<sup>13</sup>C NMR spectrum of compound 2ae

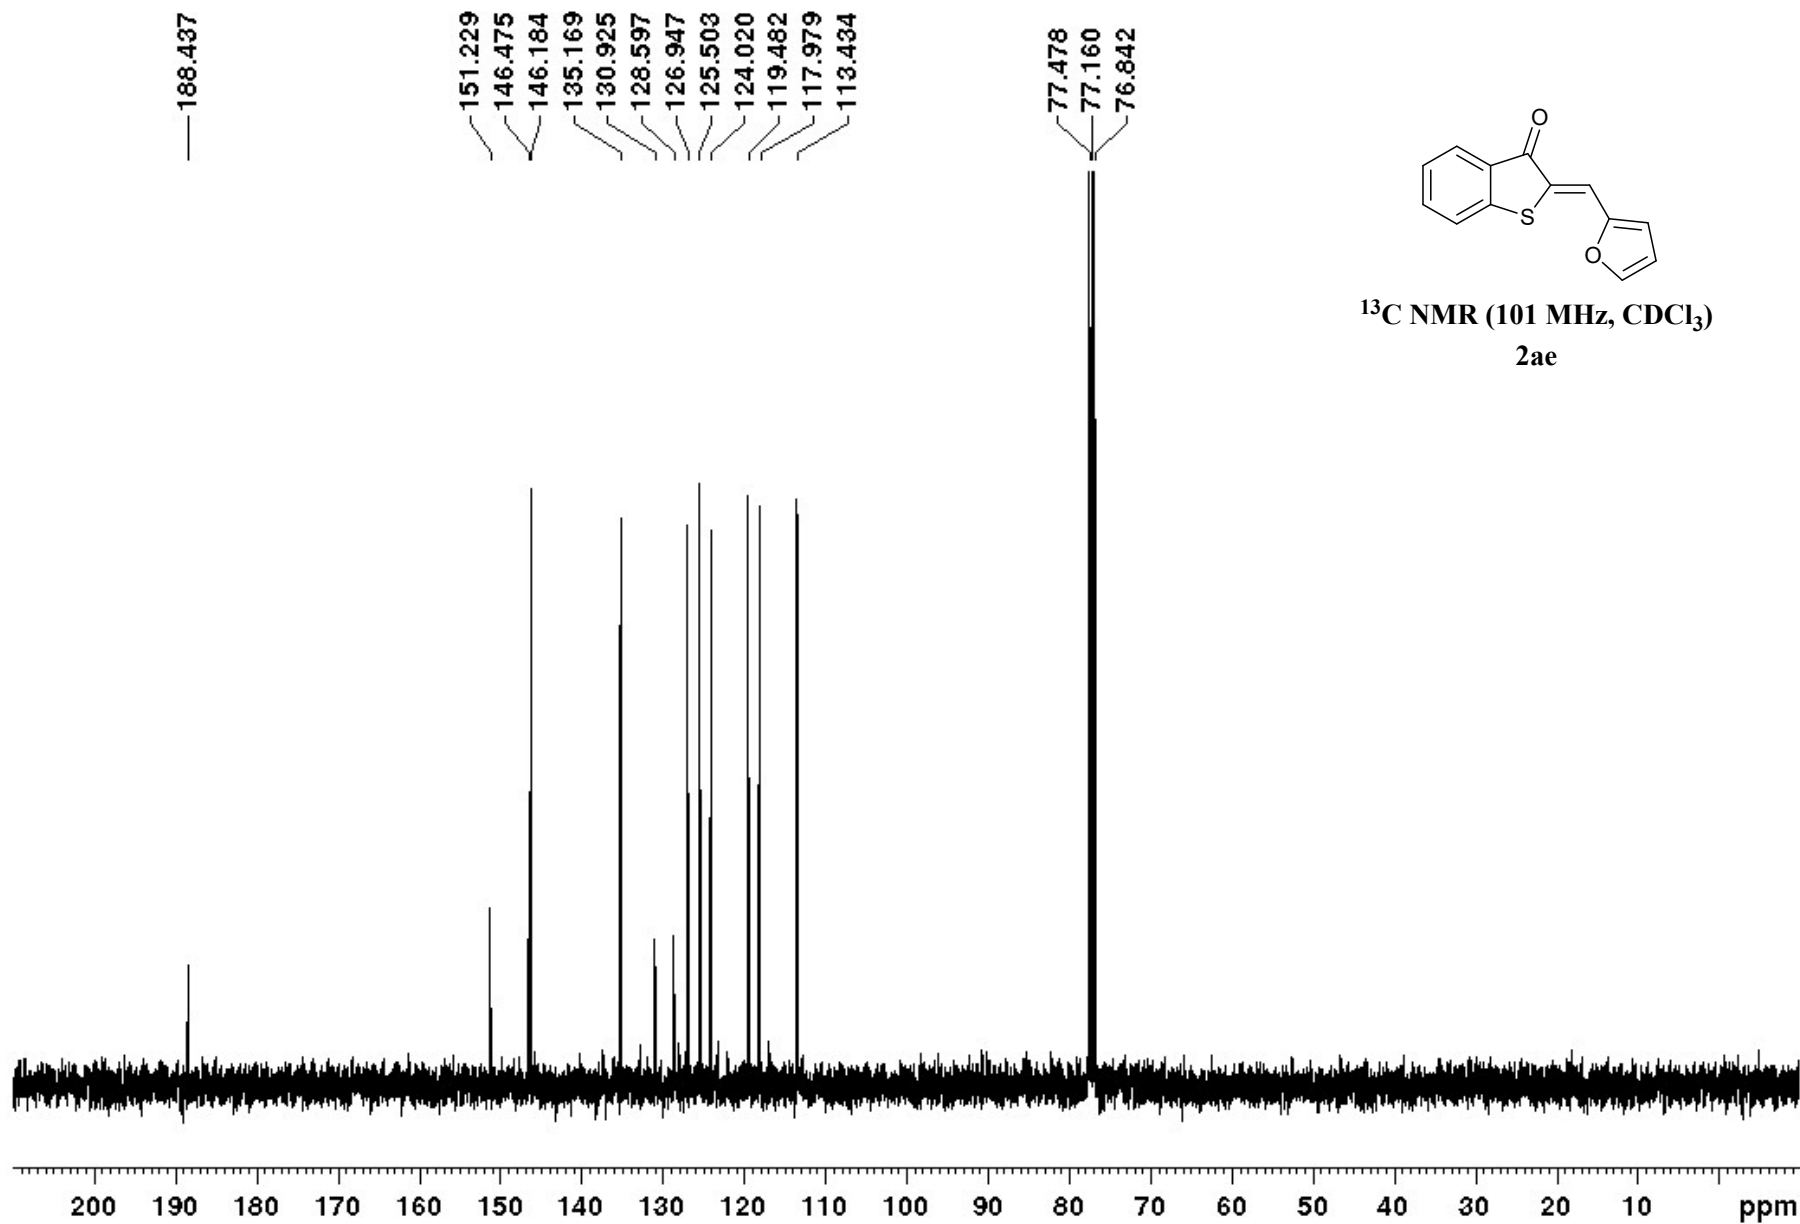

<sup>1</sup>H NMR spectrum of compound 2af

8.138  
7.925  
7.906  
7.653  
7.641  
7.591  
7.572  
7.553  
7.517  
7.496  
7.312  
7.293  
7.275  
7.260  
7.200  
7.190  
7.179

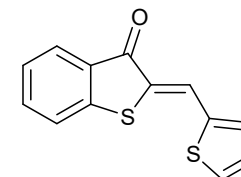

<sup>1</sup>H NMR (400 MHz, CDCl<sub>3</sub>)  
2af

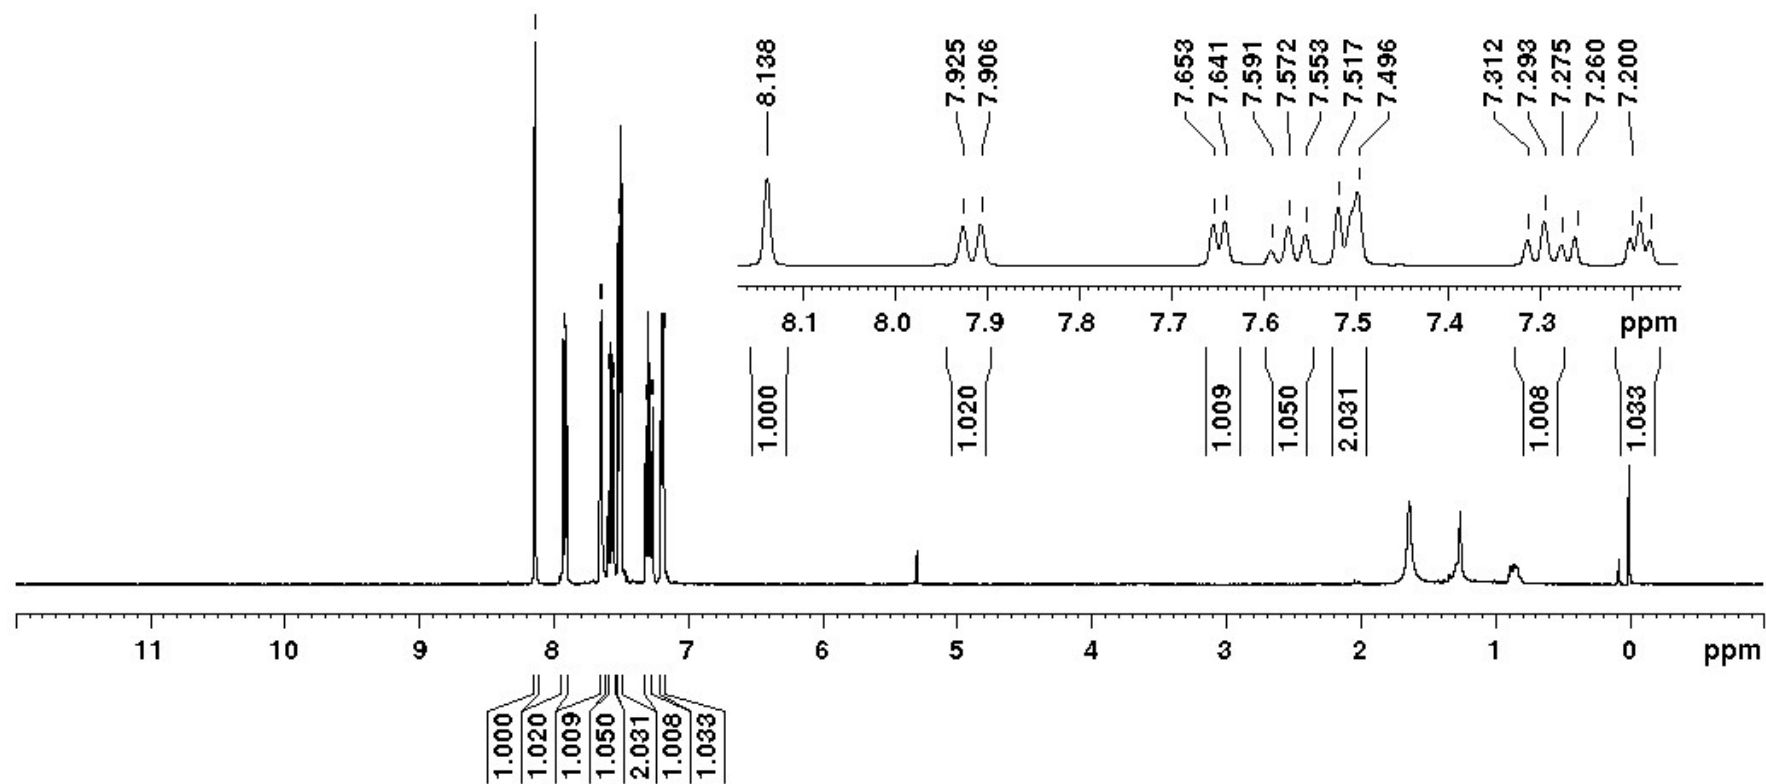

<sup>13</sup>C NMR spectrum of compound 2af

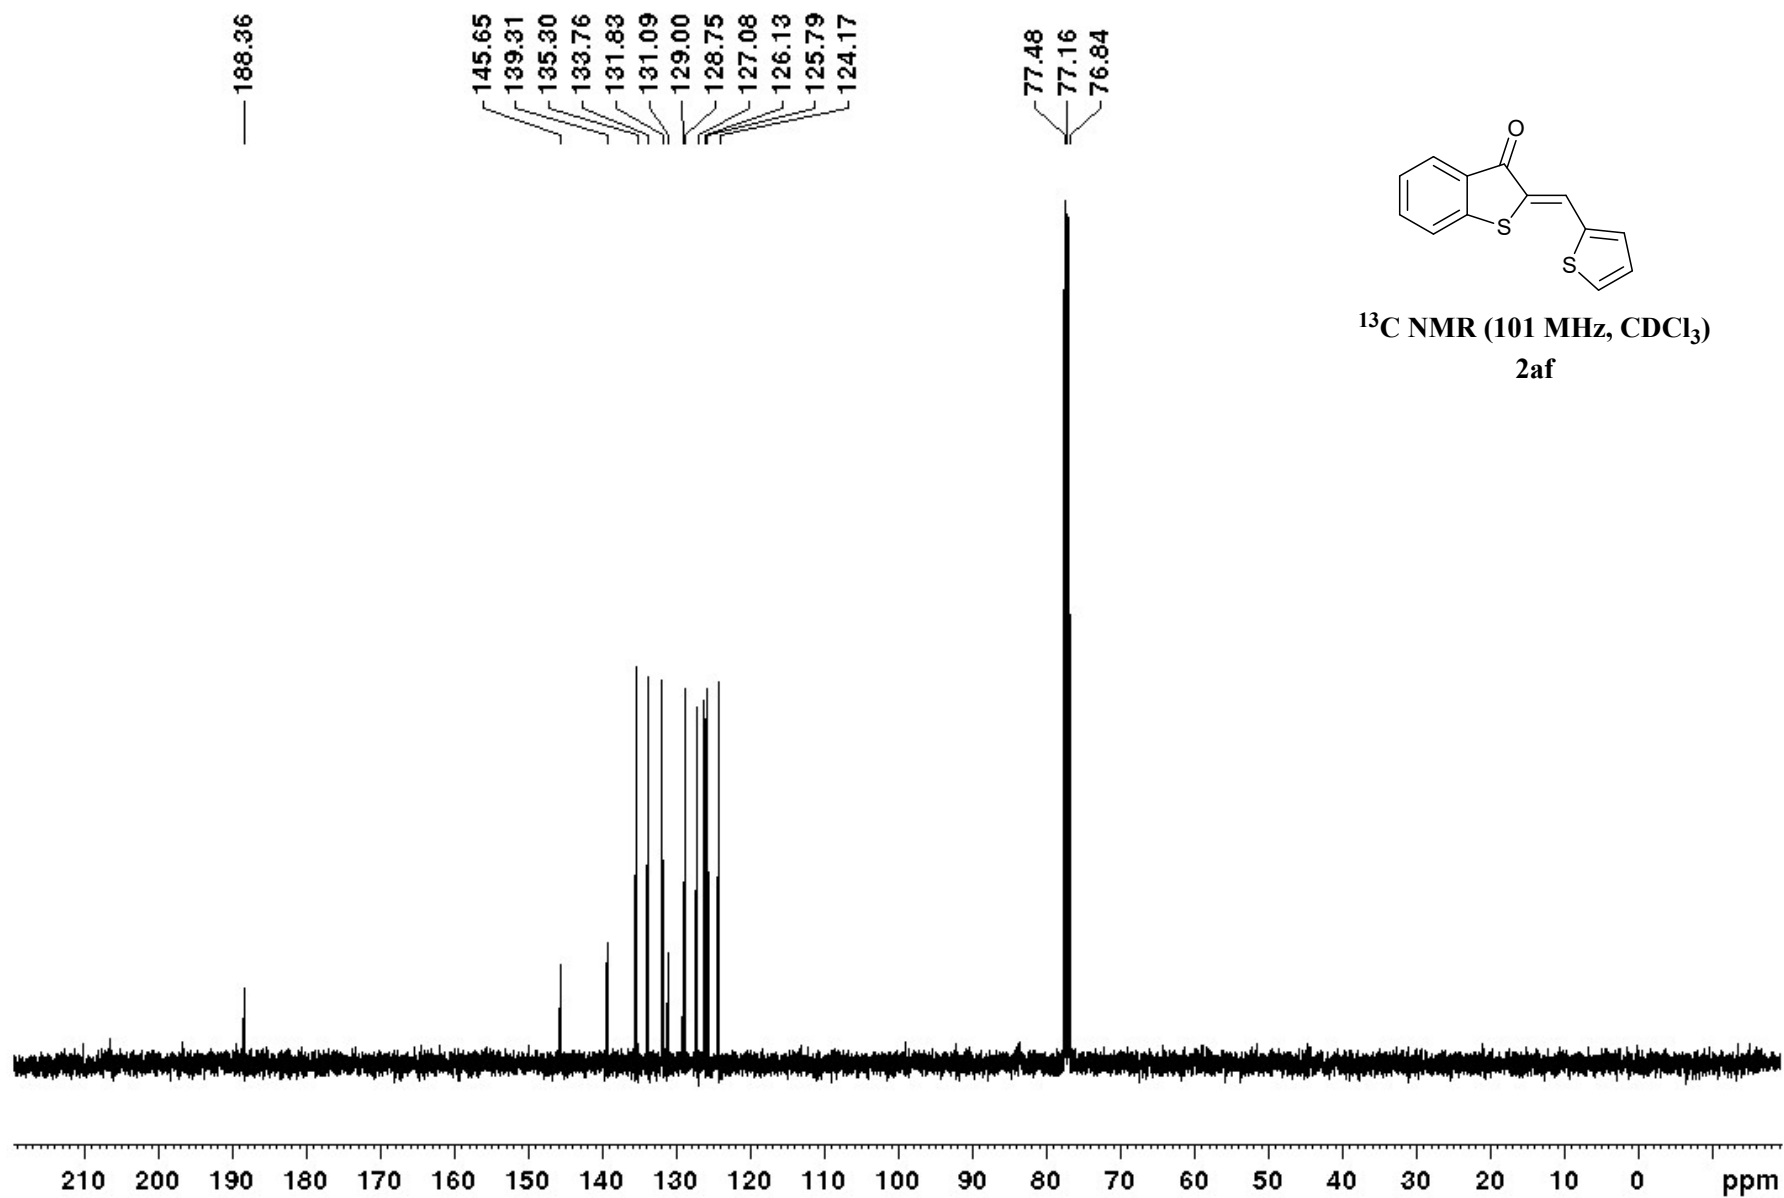



<sup>1</sup>H NMR spectrum of compound 2ag

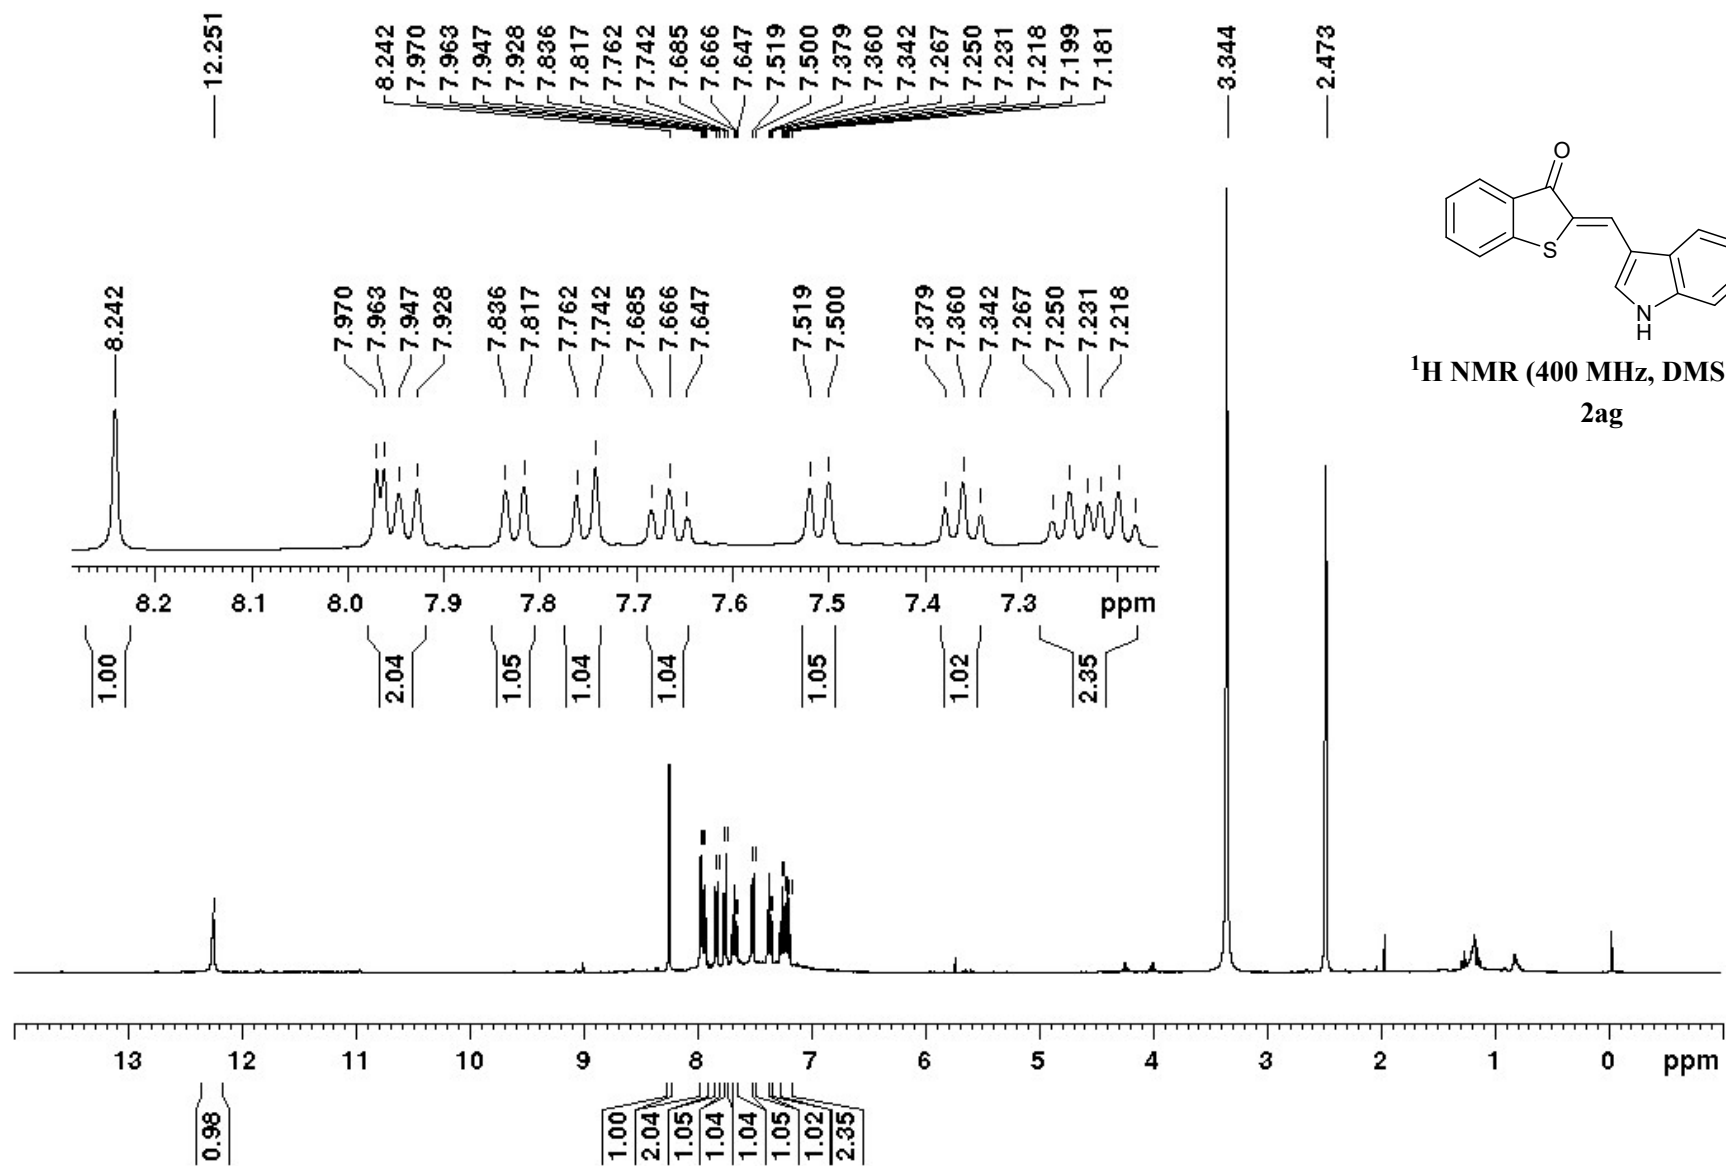

<sup>13</sup>C NMR spectrum of compound 2ag

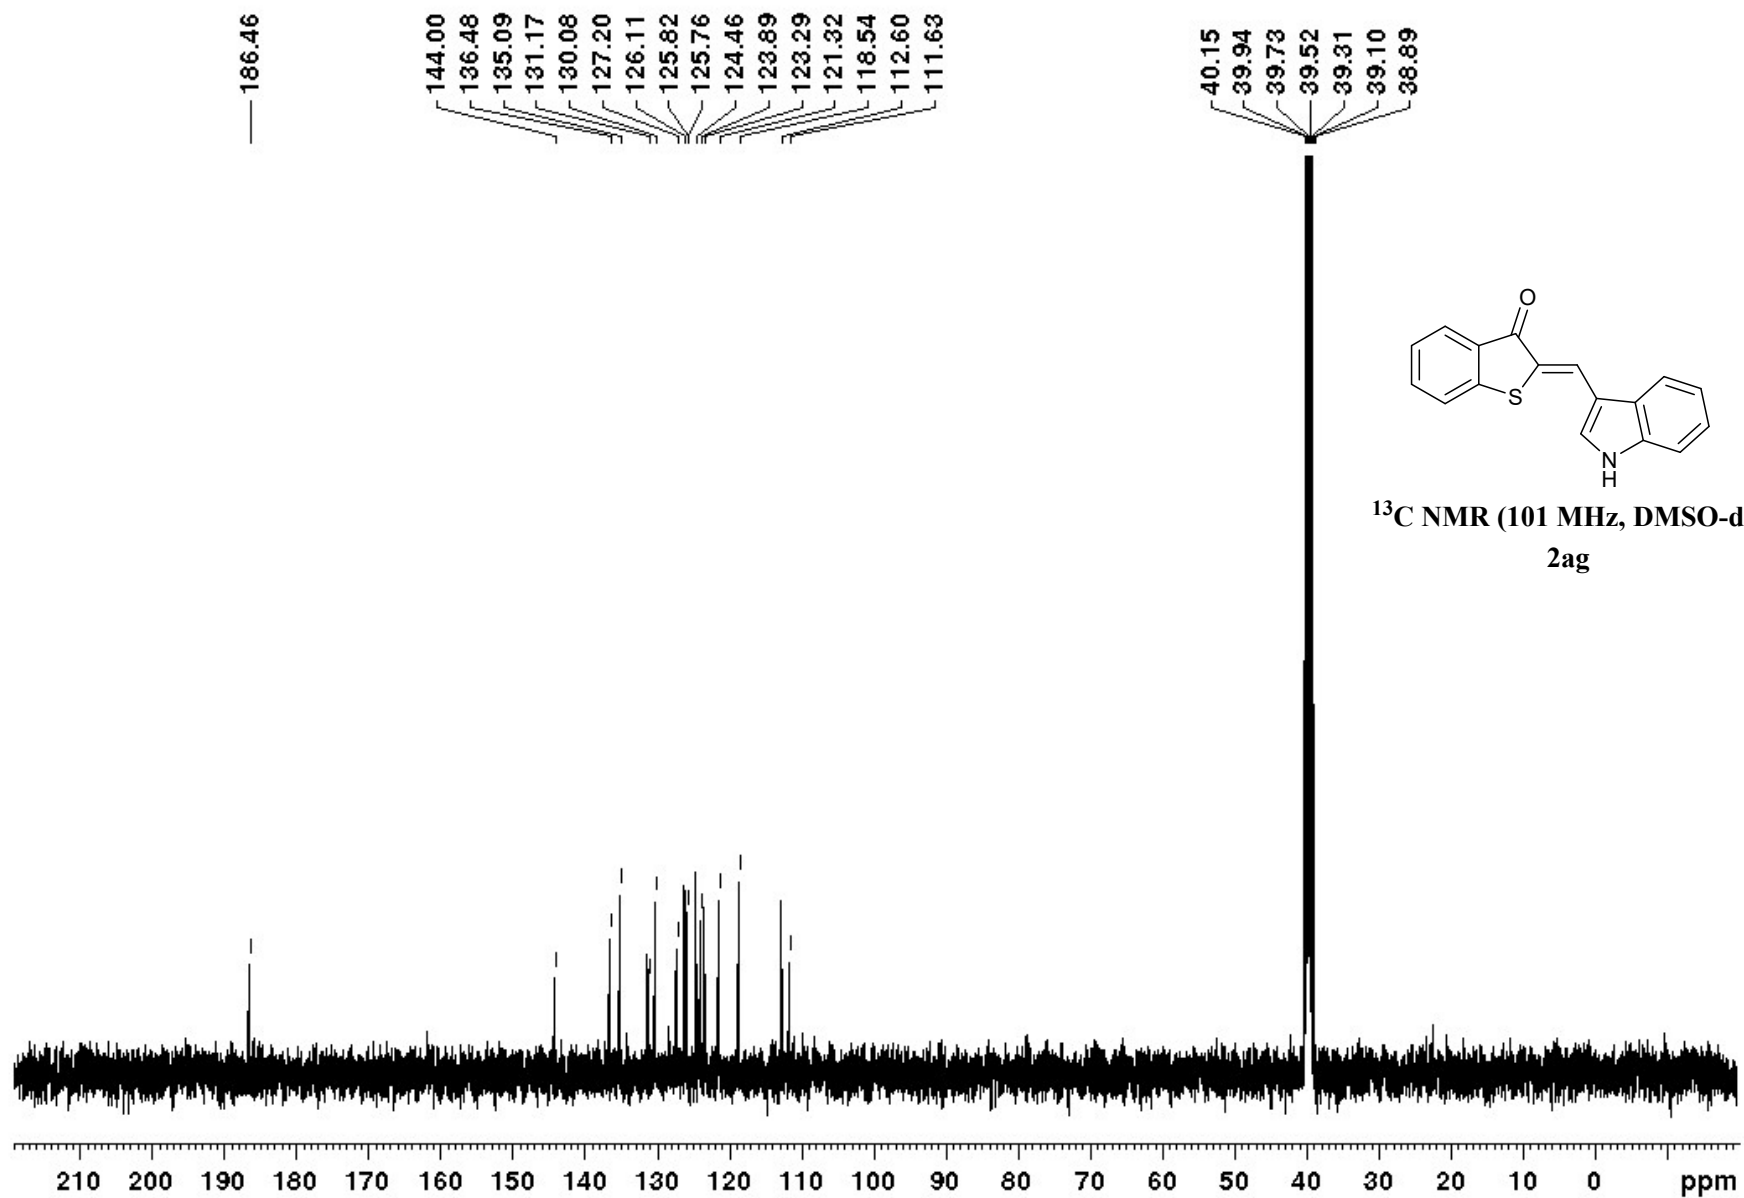

<sup>1</sup>H NMR spectrum of compound 2ah

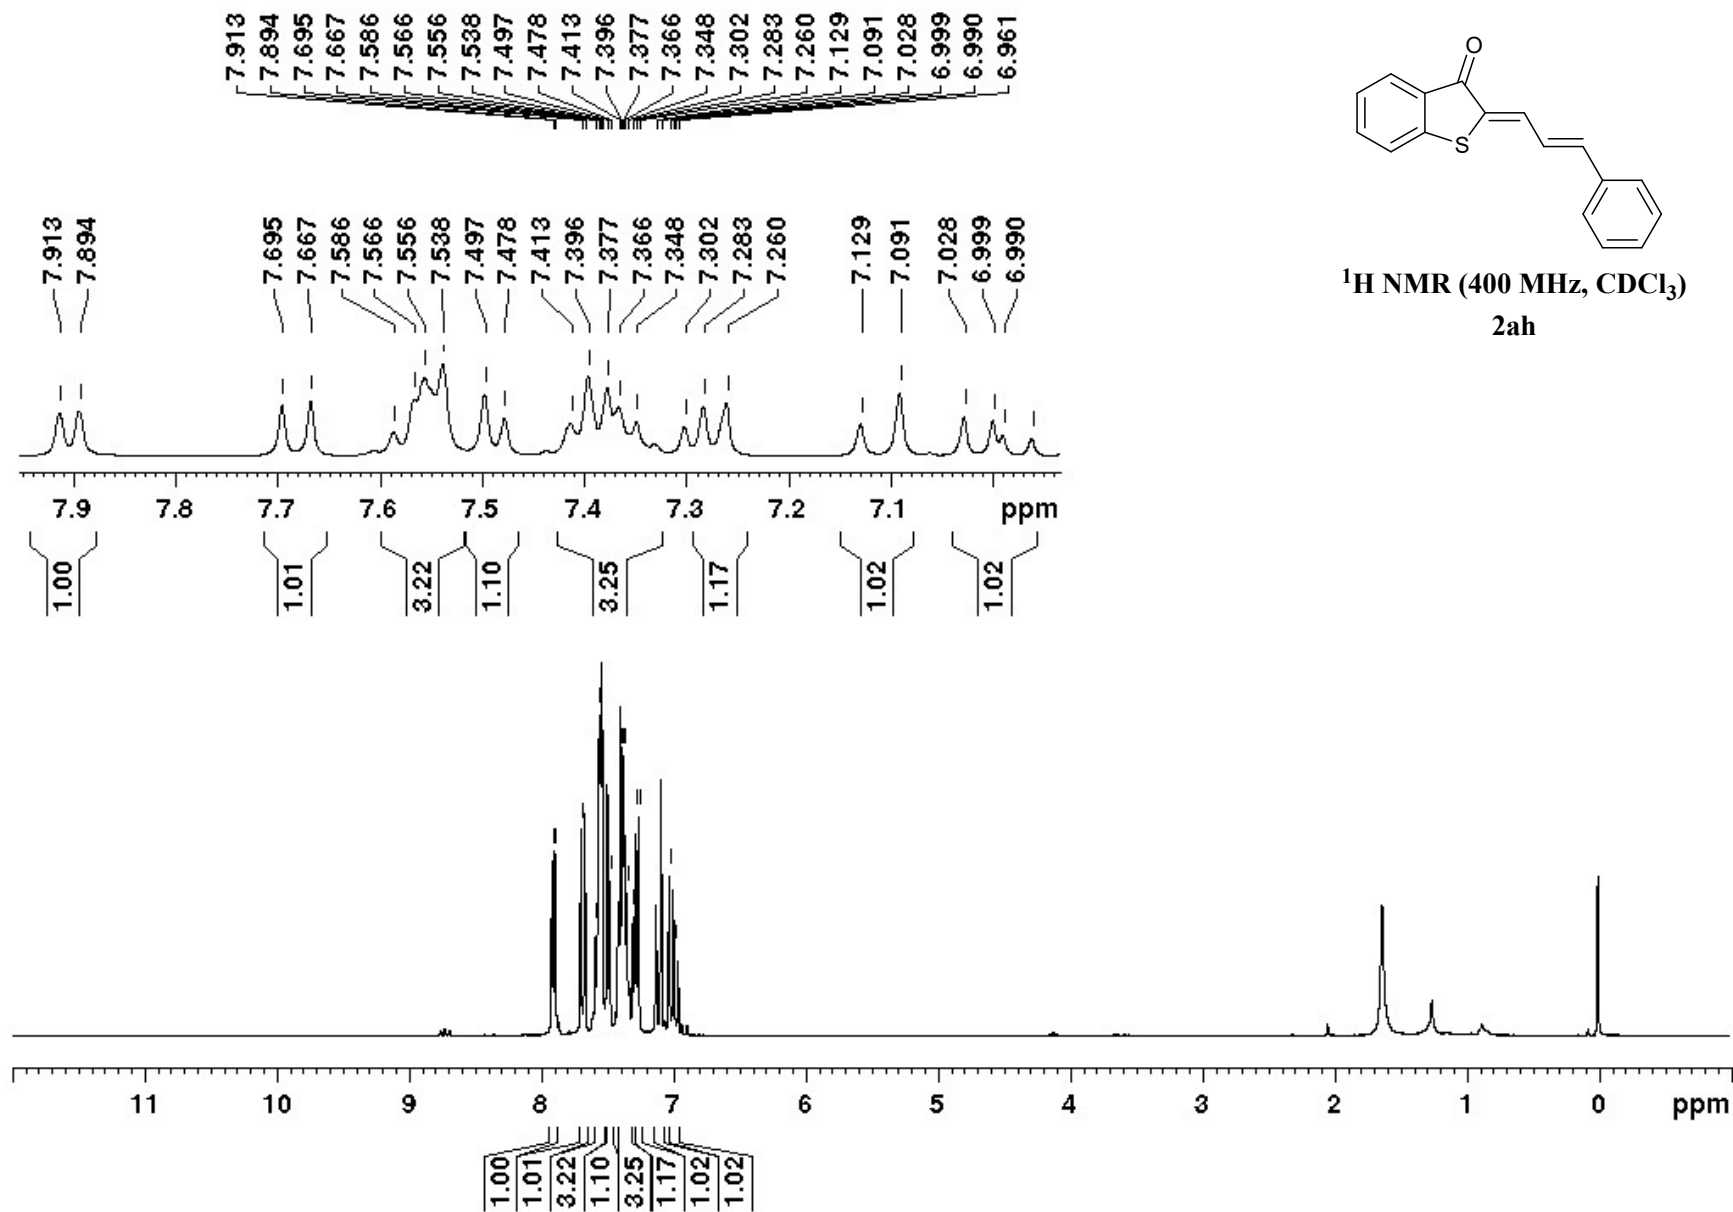

<sup>13</sup>C NMR spectrum of compound 2ah

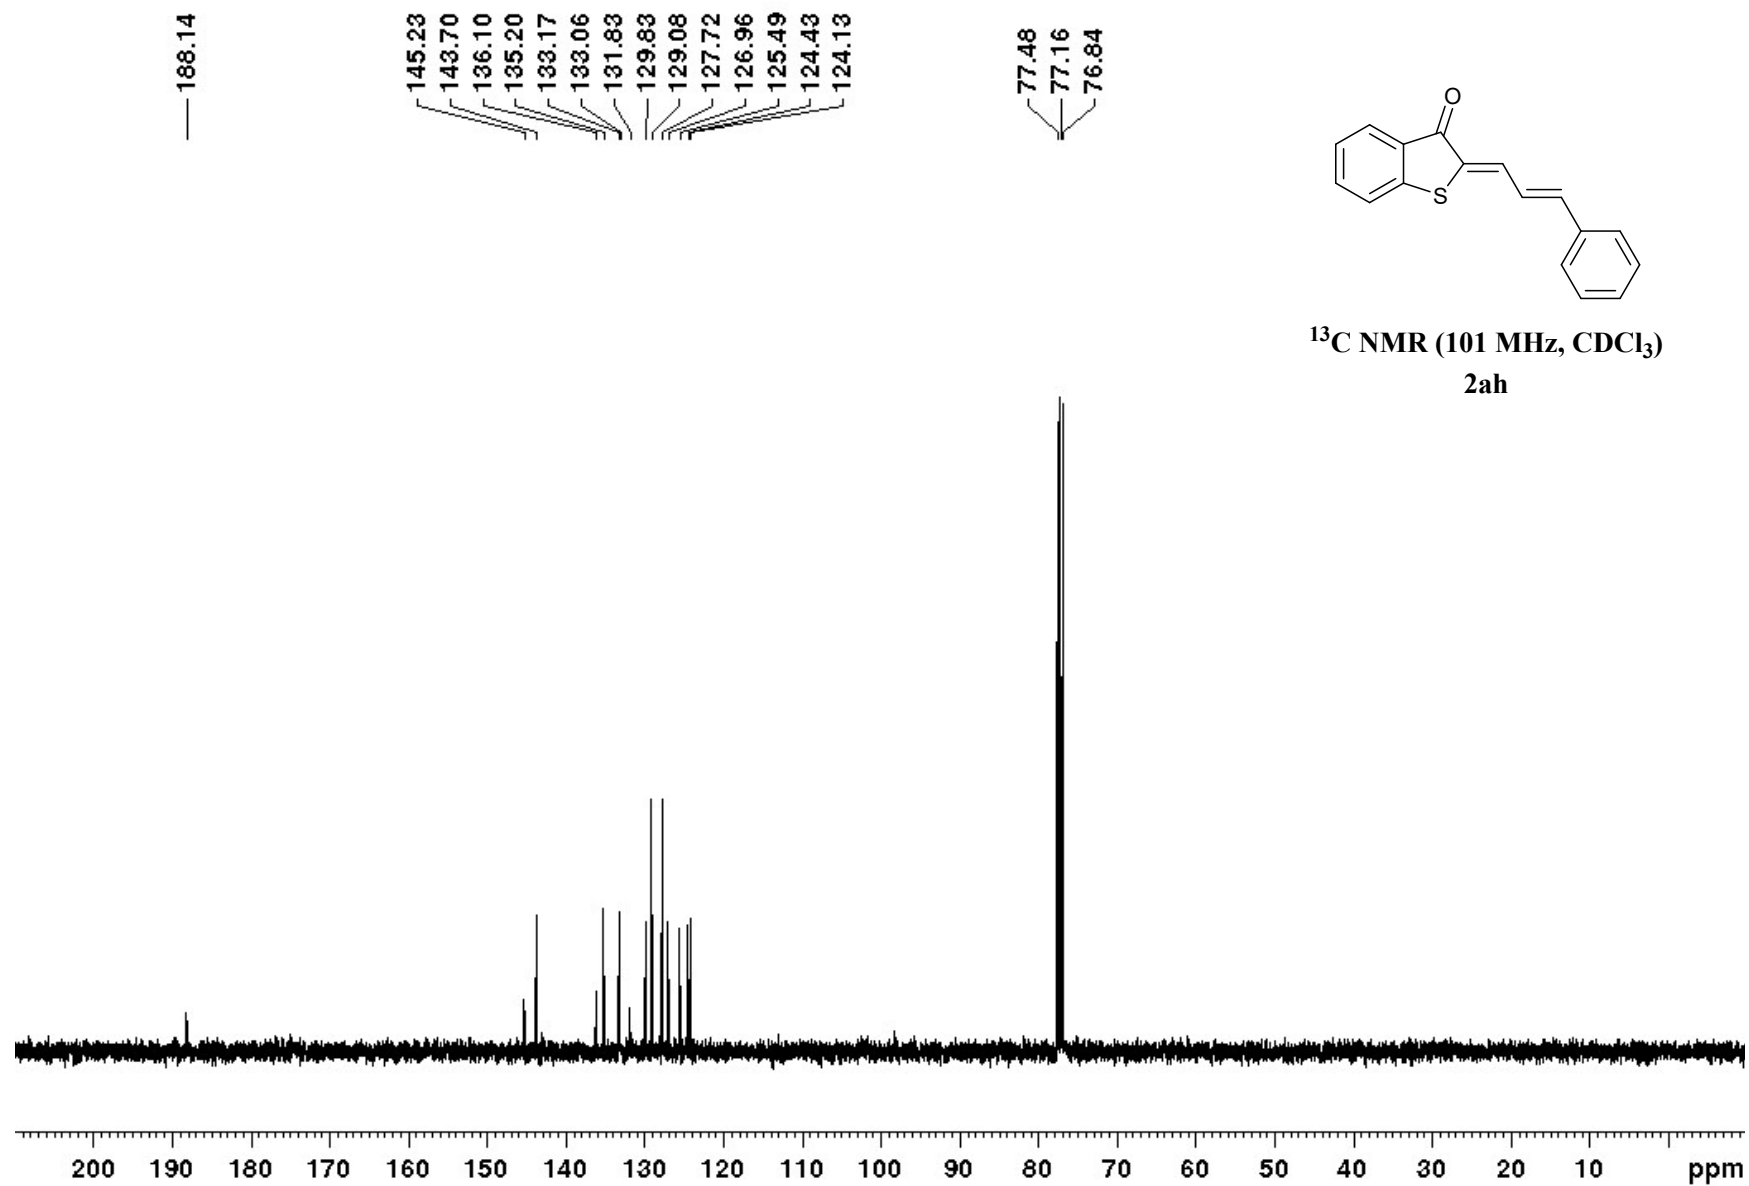

v

<sup>1</sup>H NMR spectrum of compound 2ai

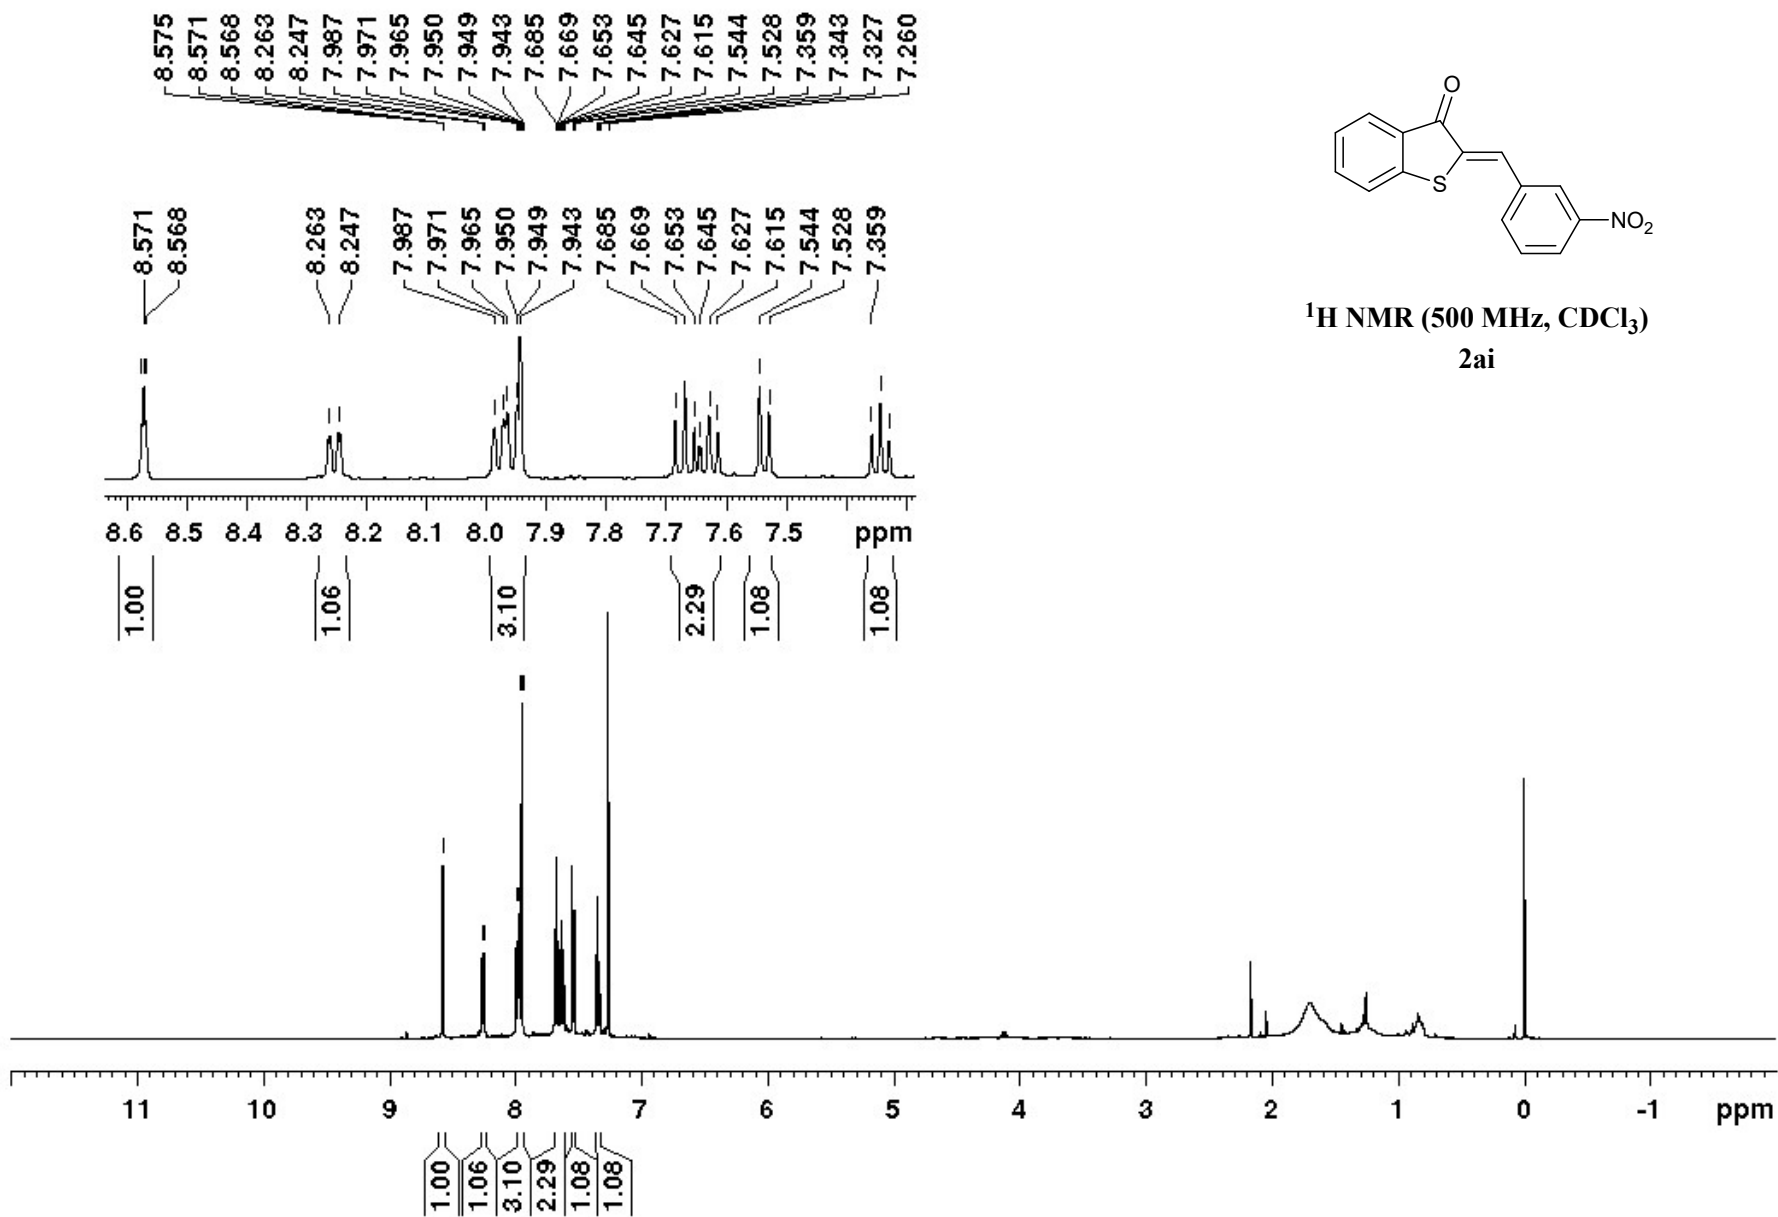

<sup>13</sup>C NMR spectrum of compound 2ai

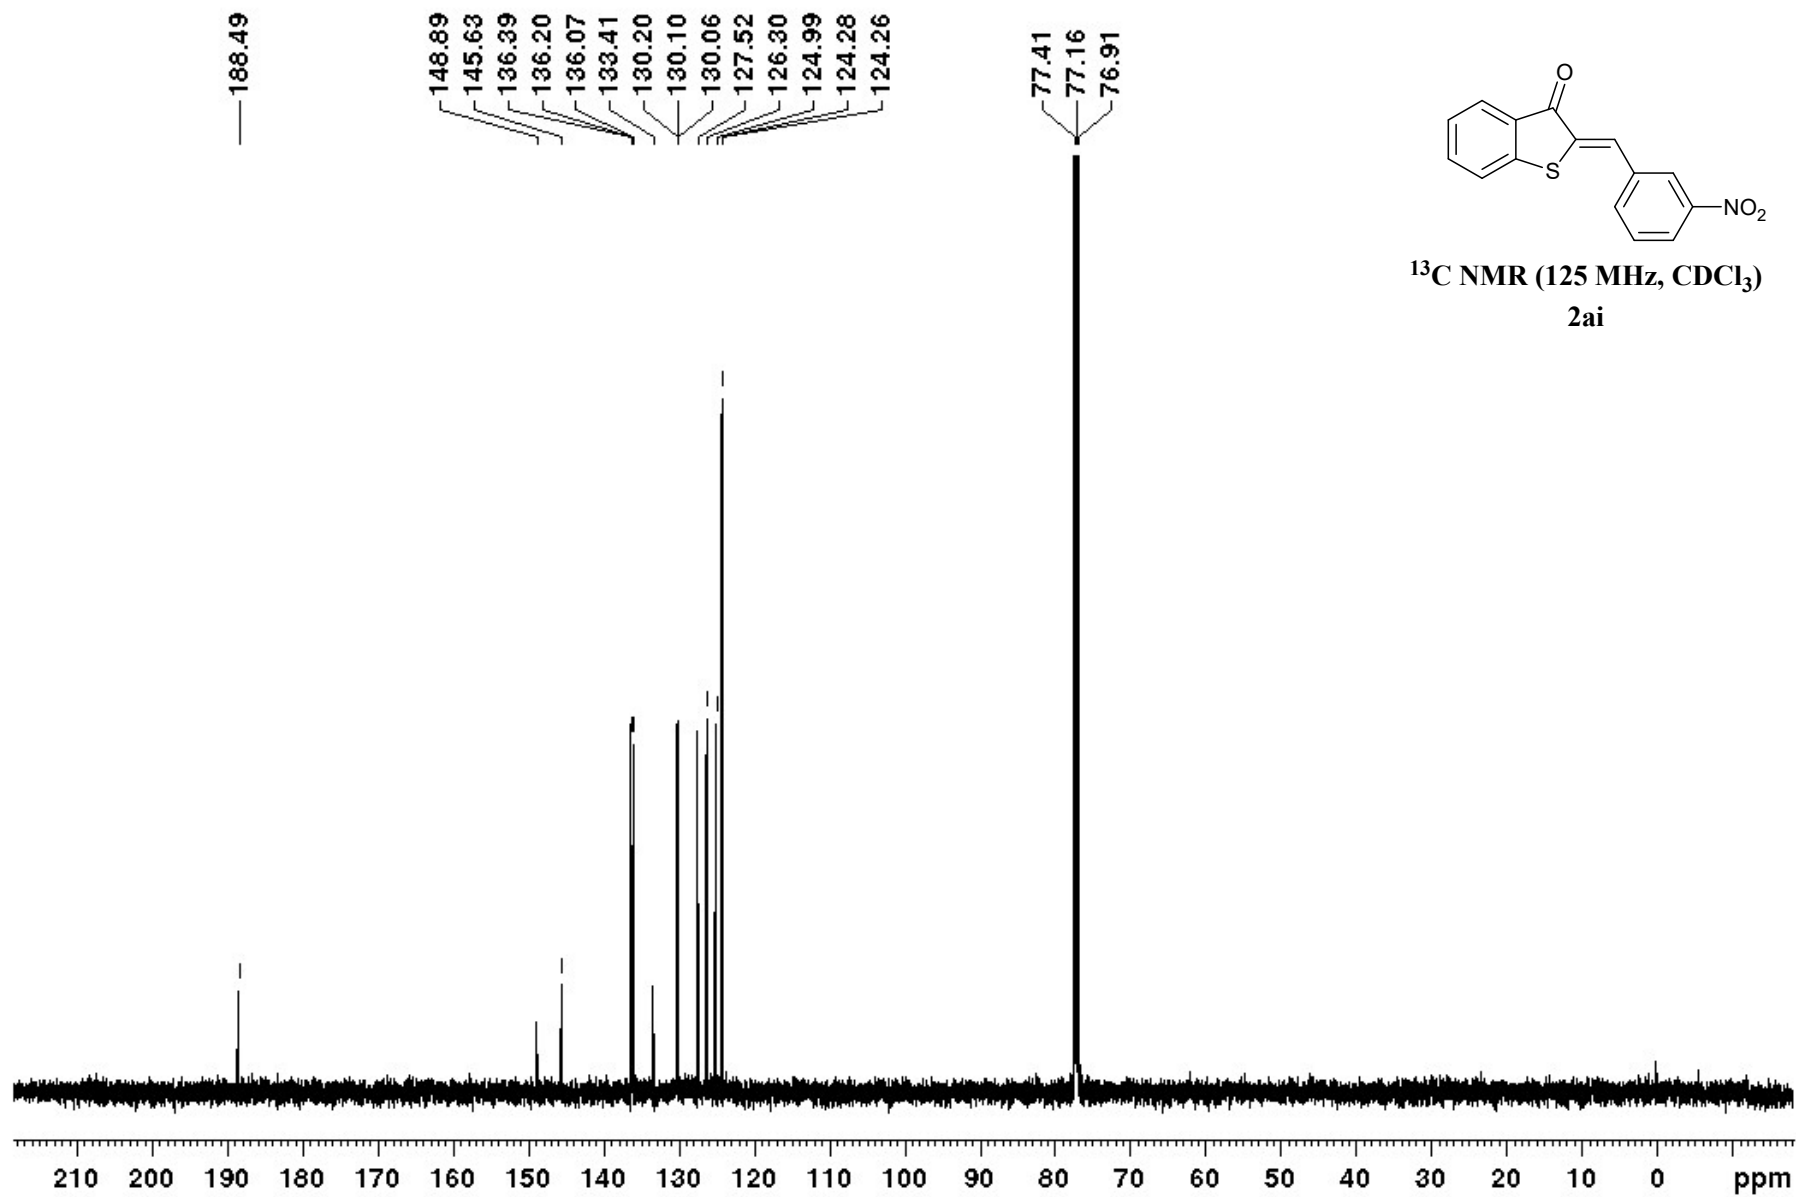

<sup>1</sup>H NMR spectrum of compound 2aj

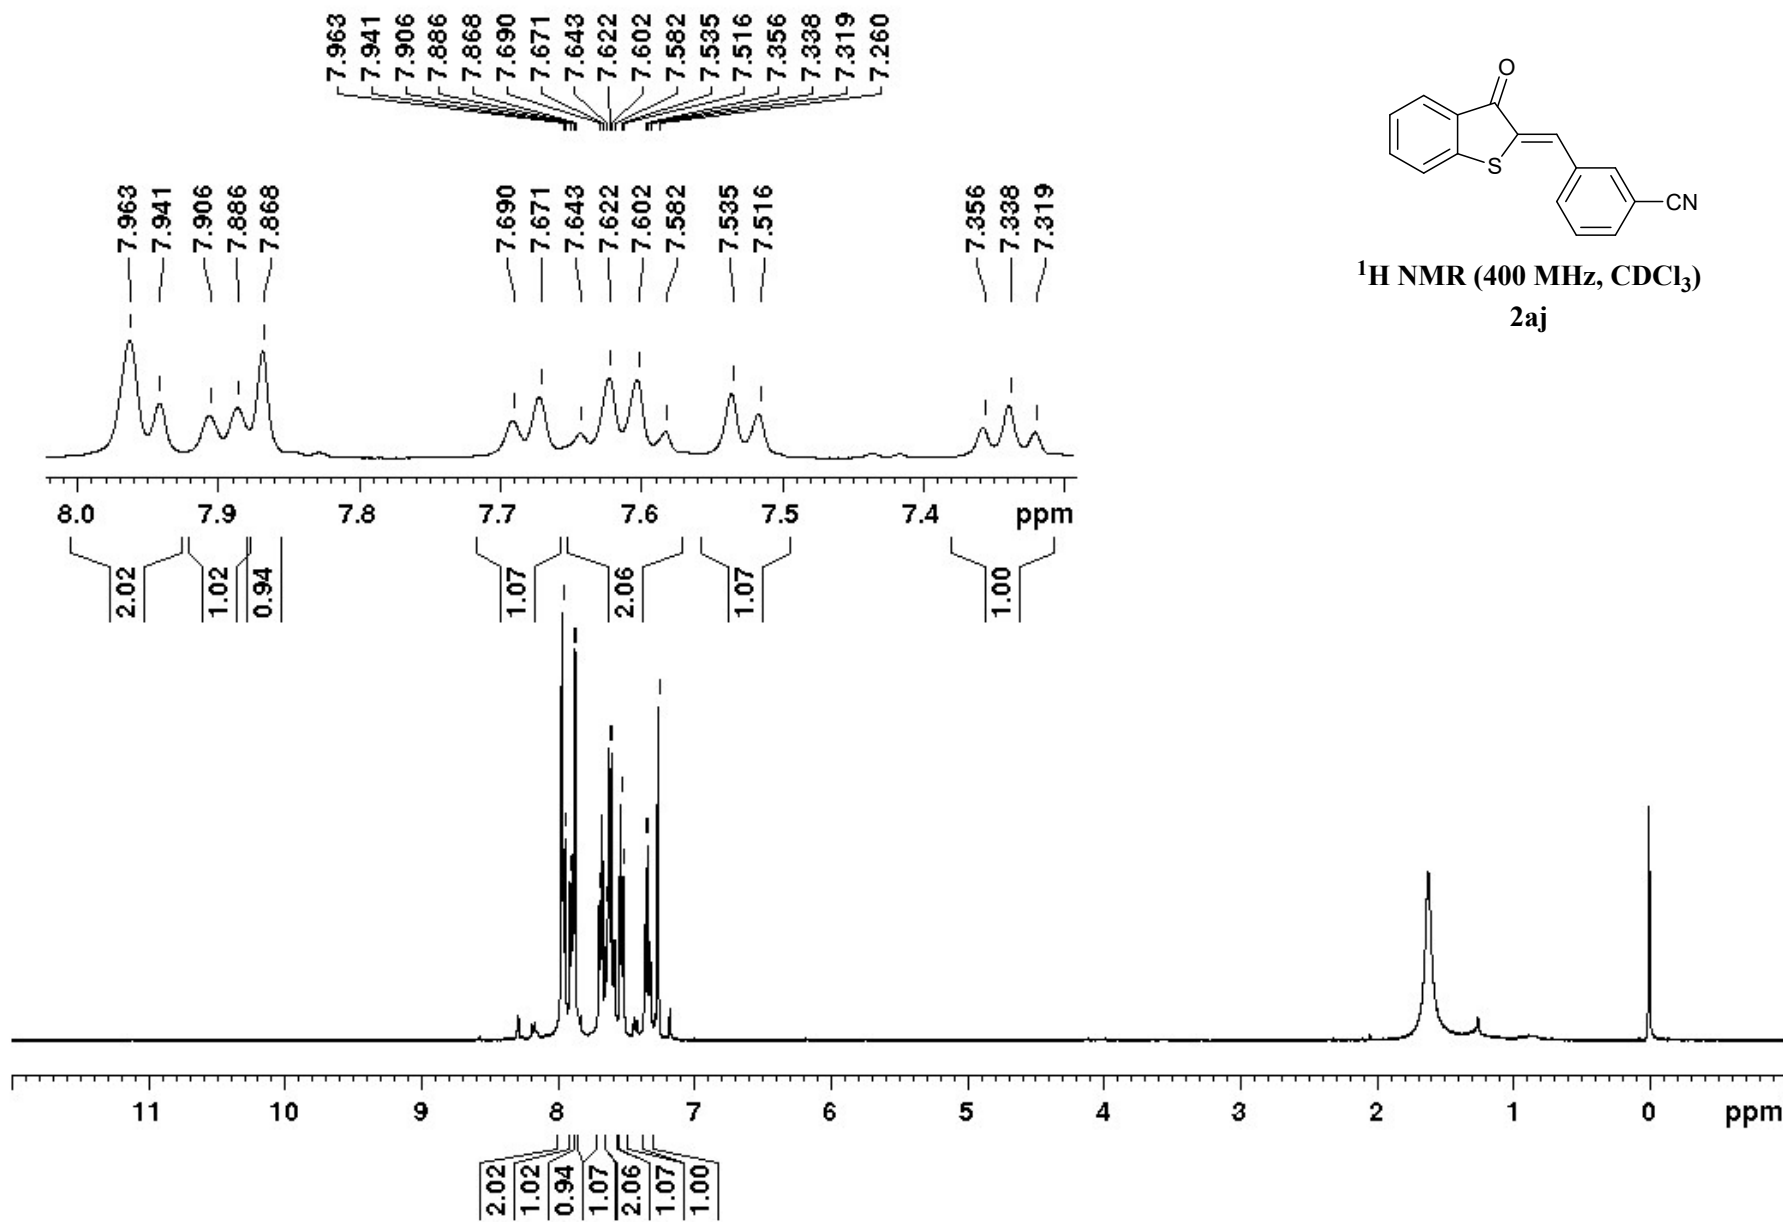

<sup>13</sup>C NMR spectrum of compound 2aj

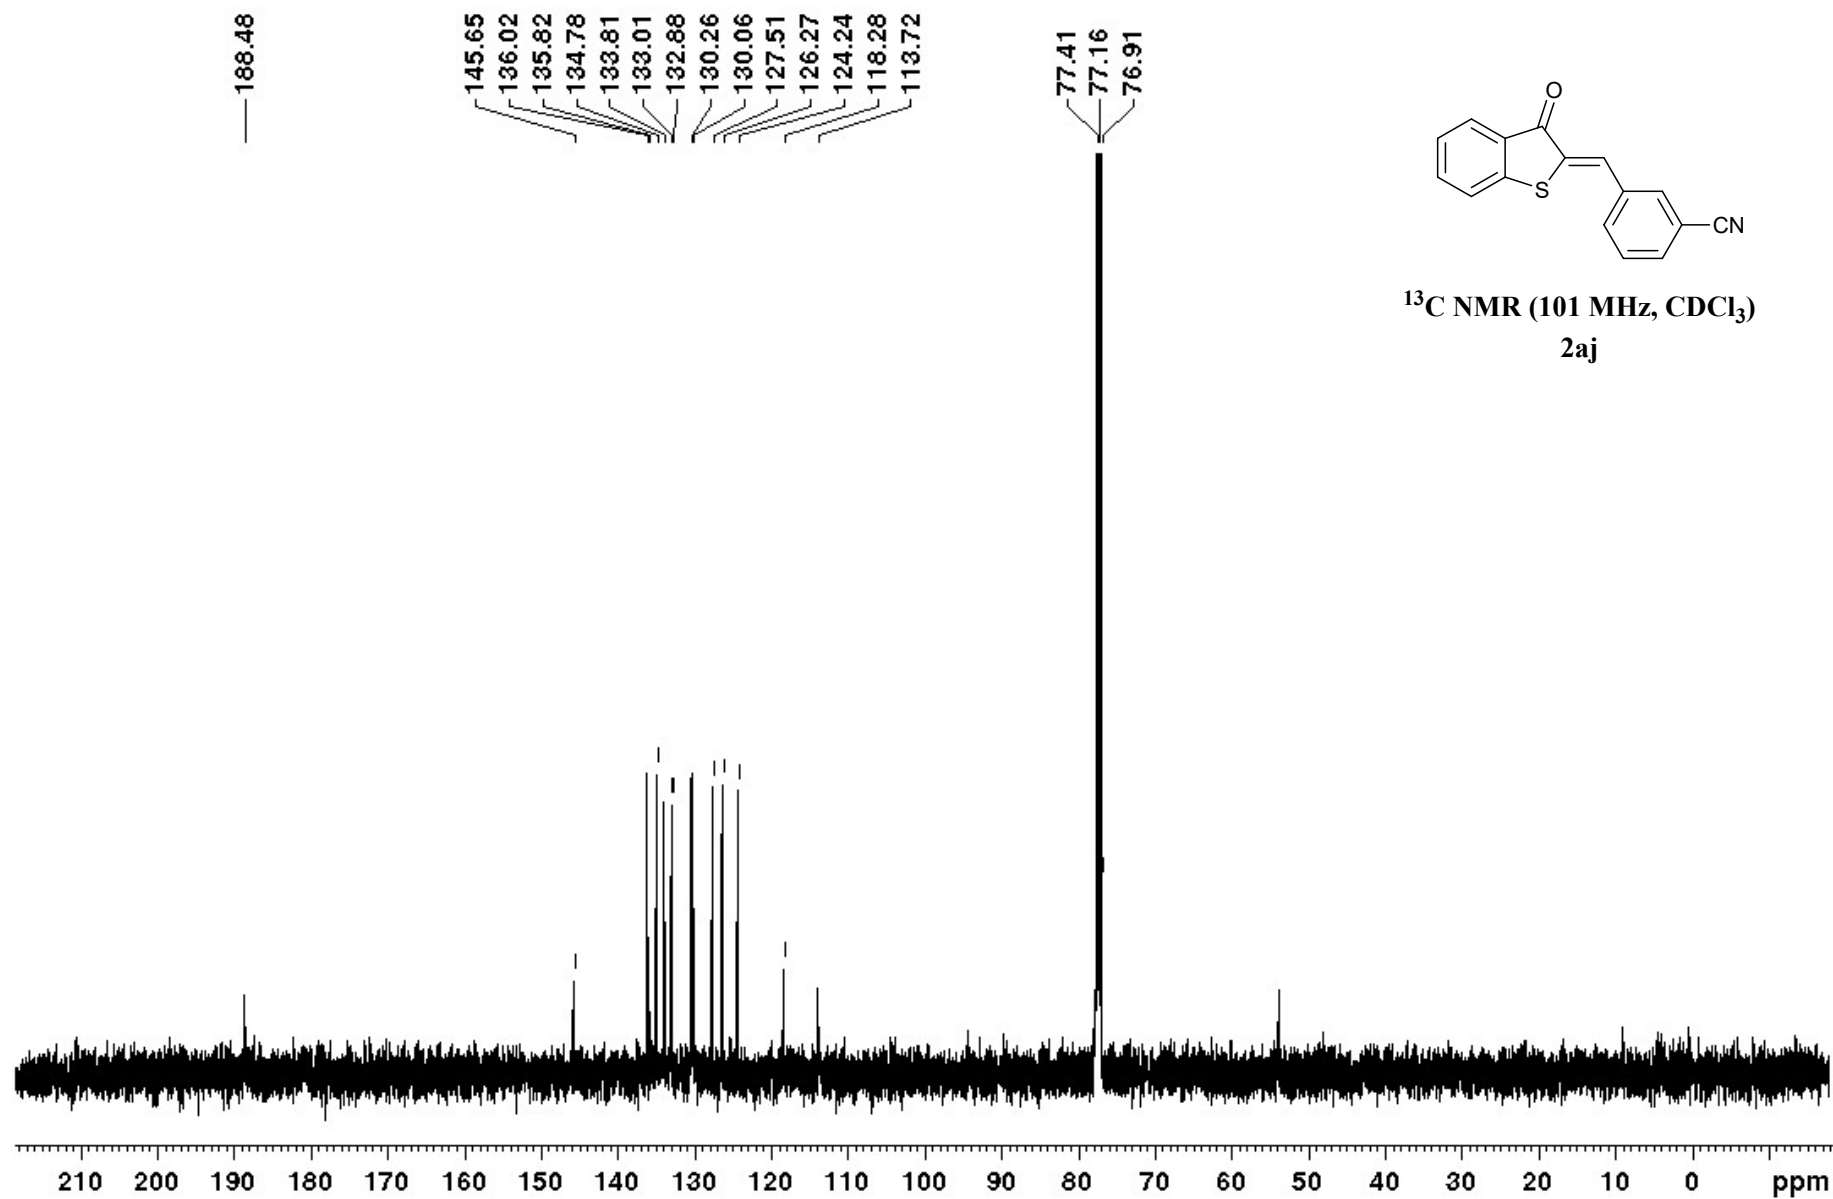



<sup>1</sup>H NMR spectrum of compound 1a

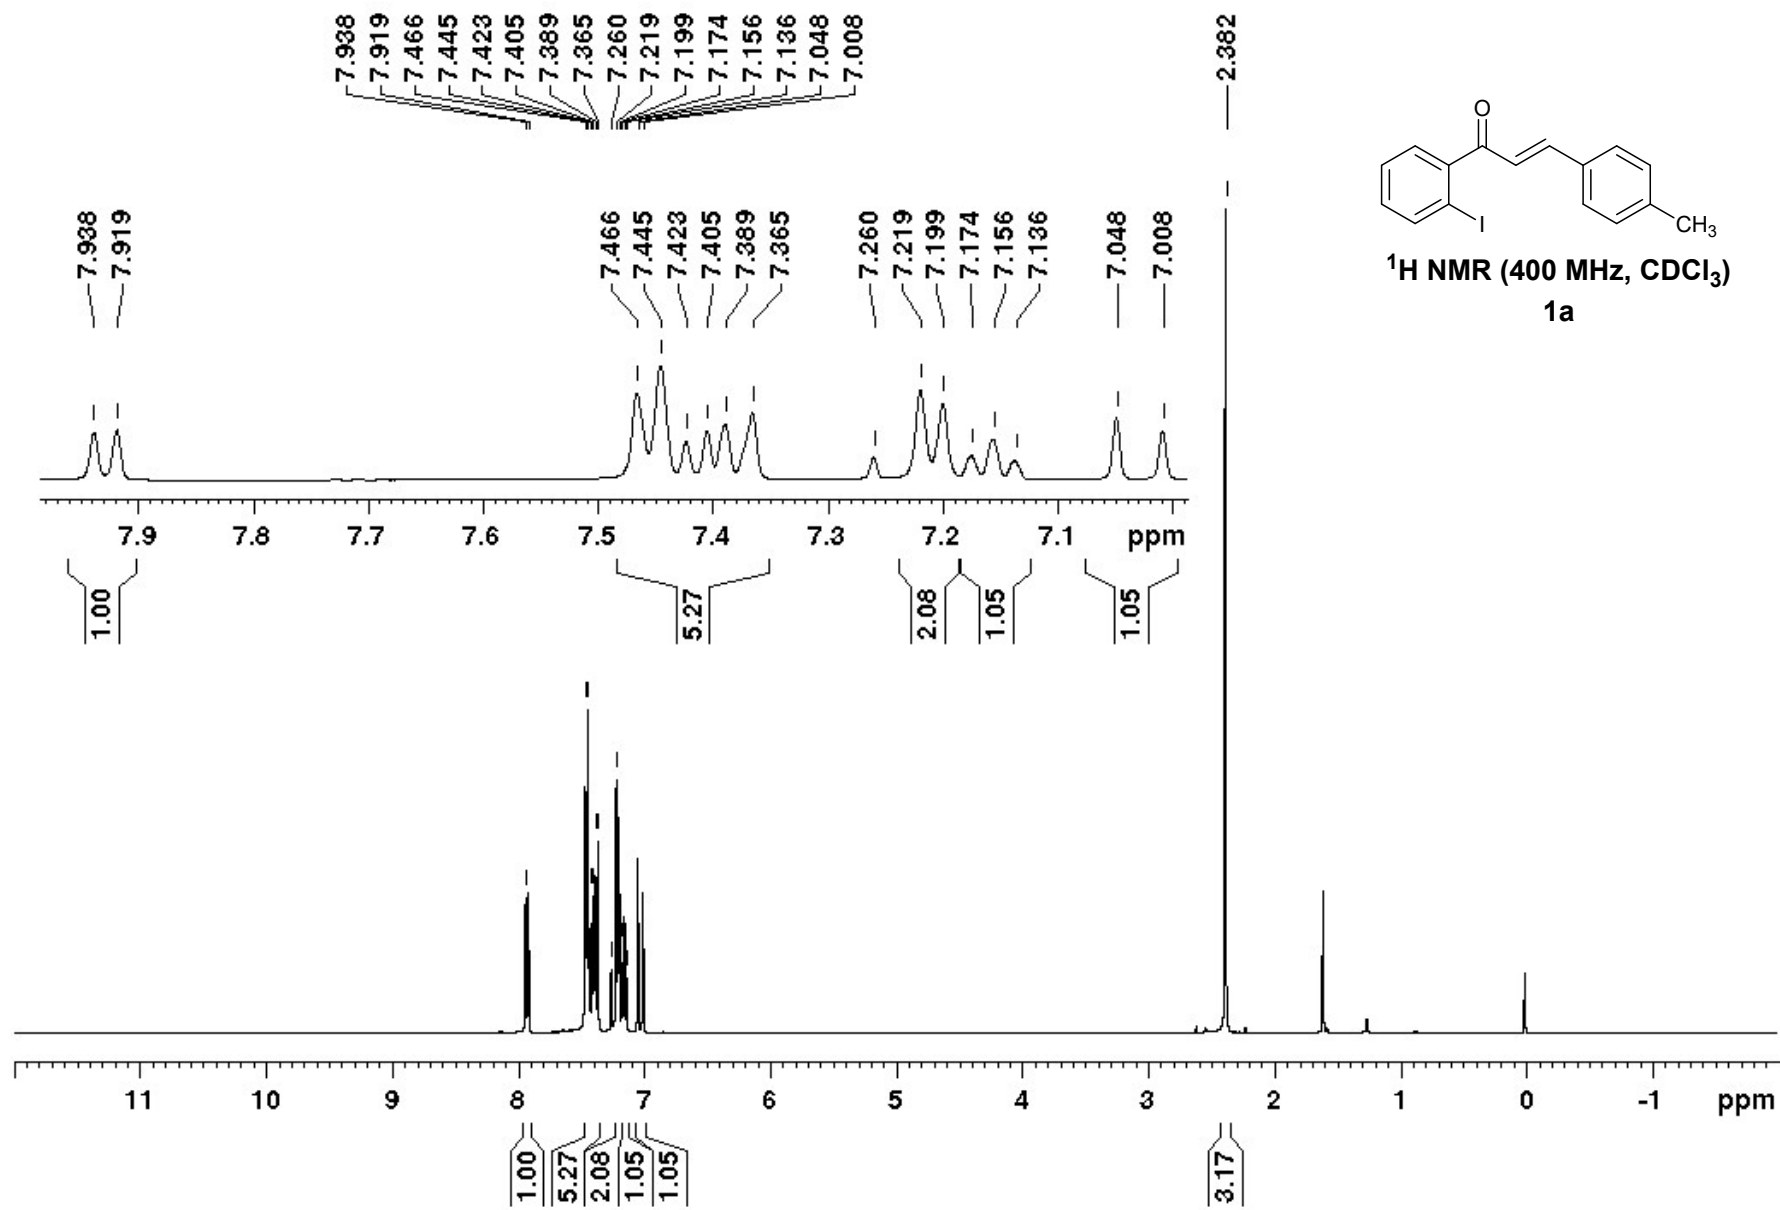

<sup>13</sup>C NMR spectrum of compound 1a

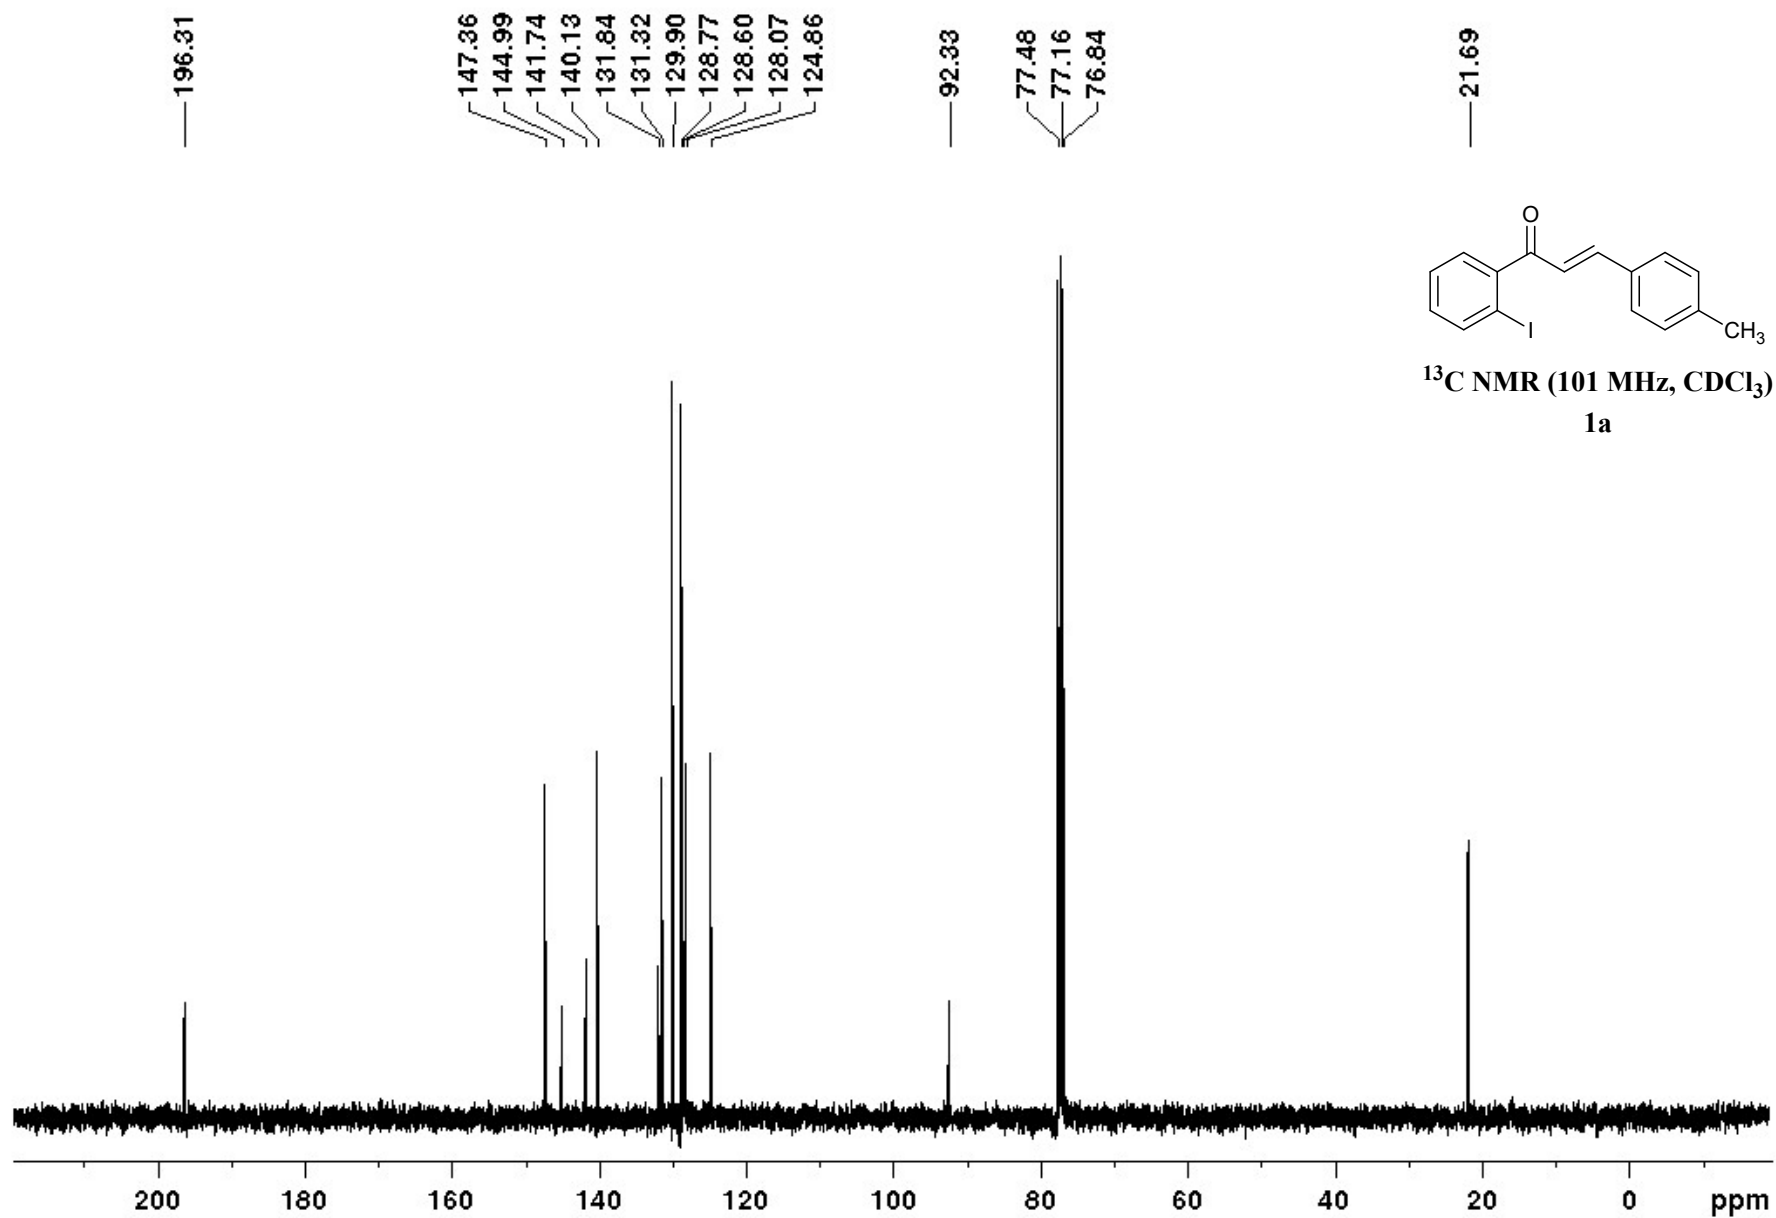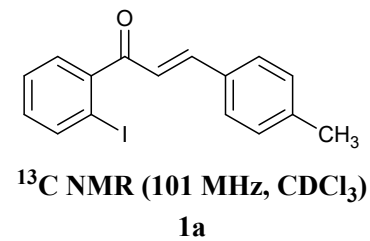

<sup>1</sup>H NMR spectrum of compound 6

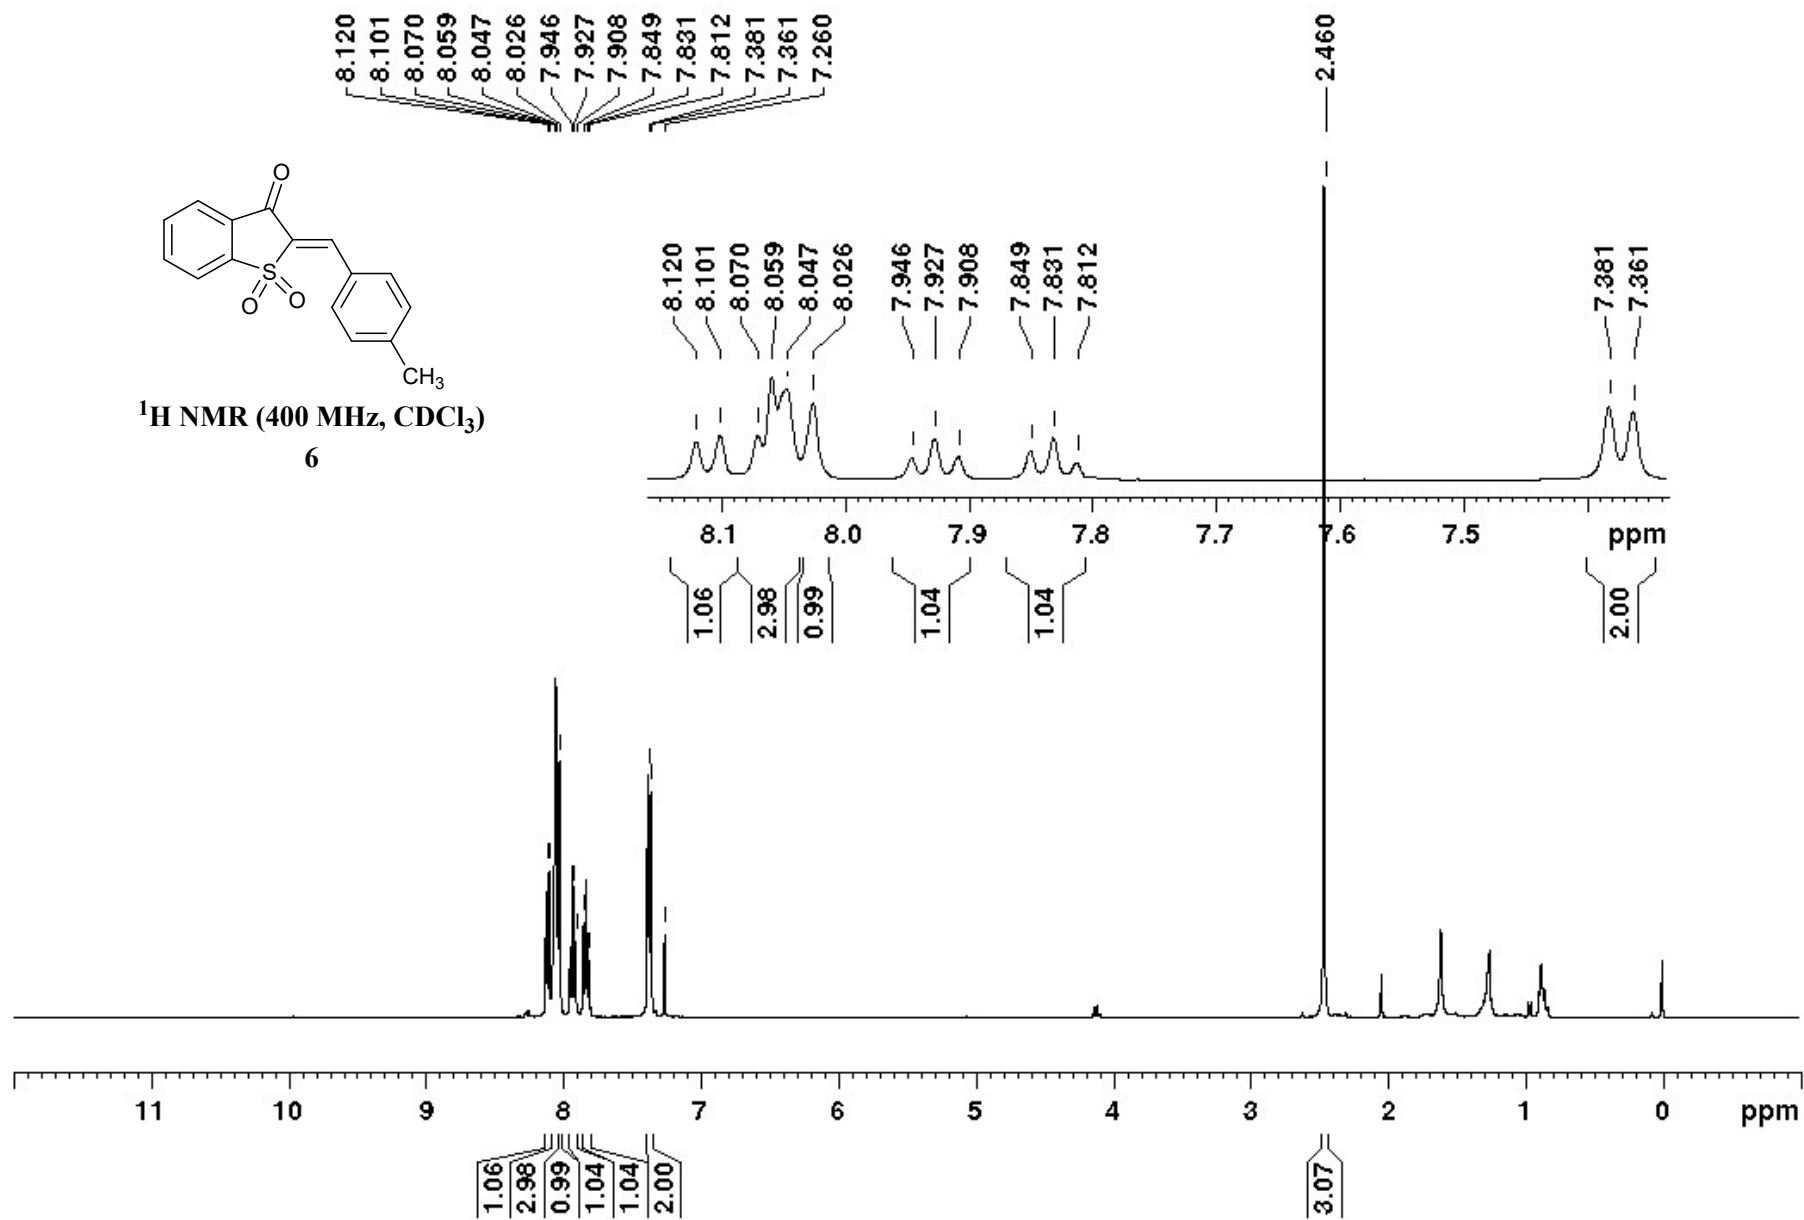

<sup>13</sup>C NMR spectrum of compound 6

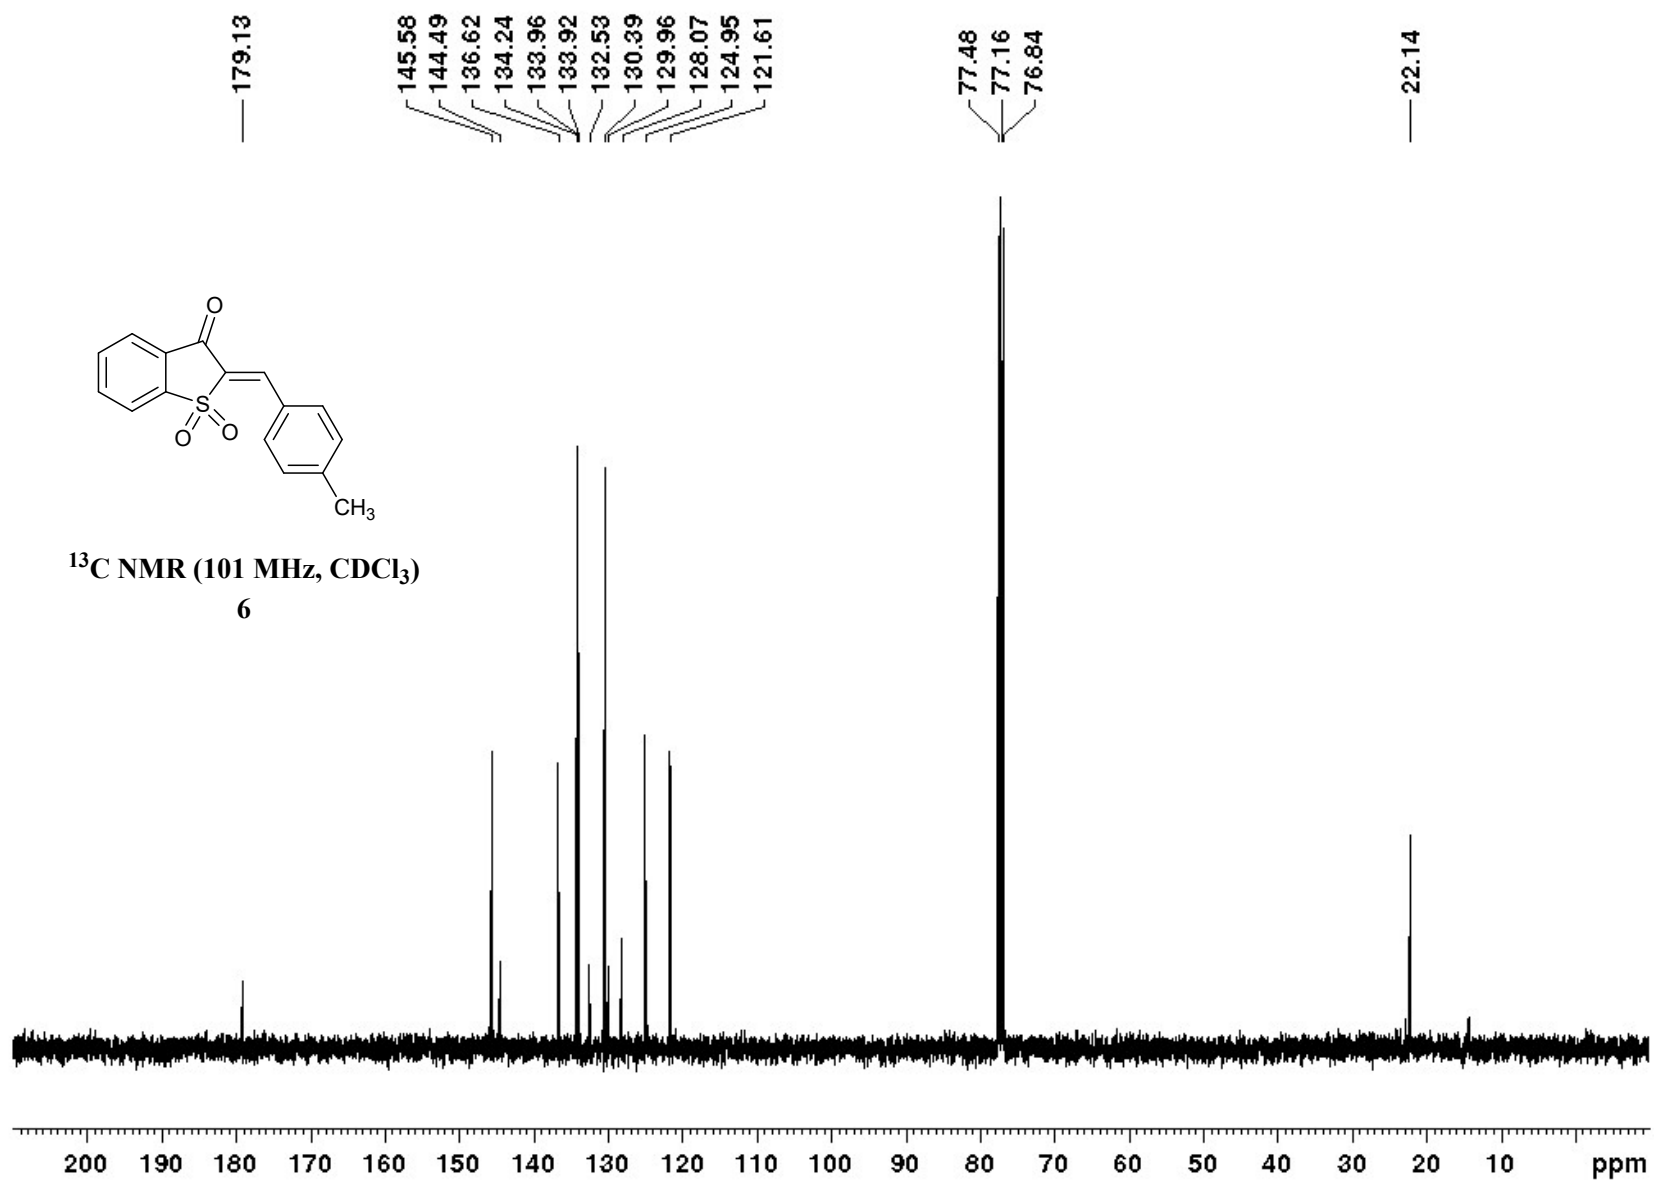

<sup>1</sup>H NMR spectrum of compound 7

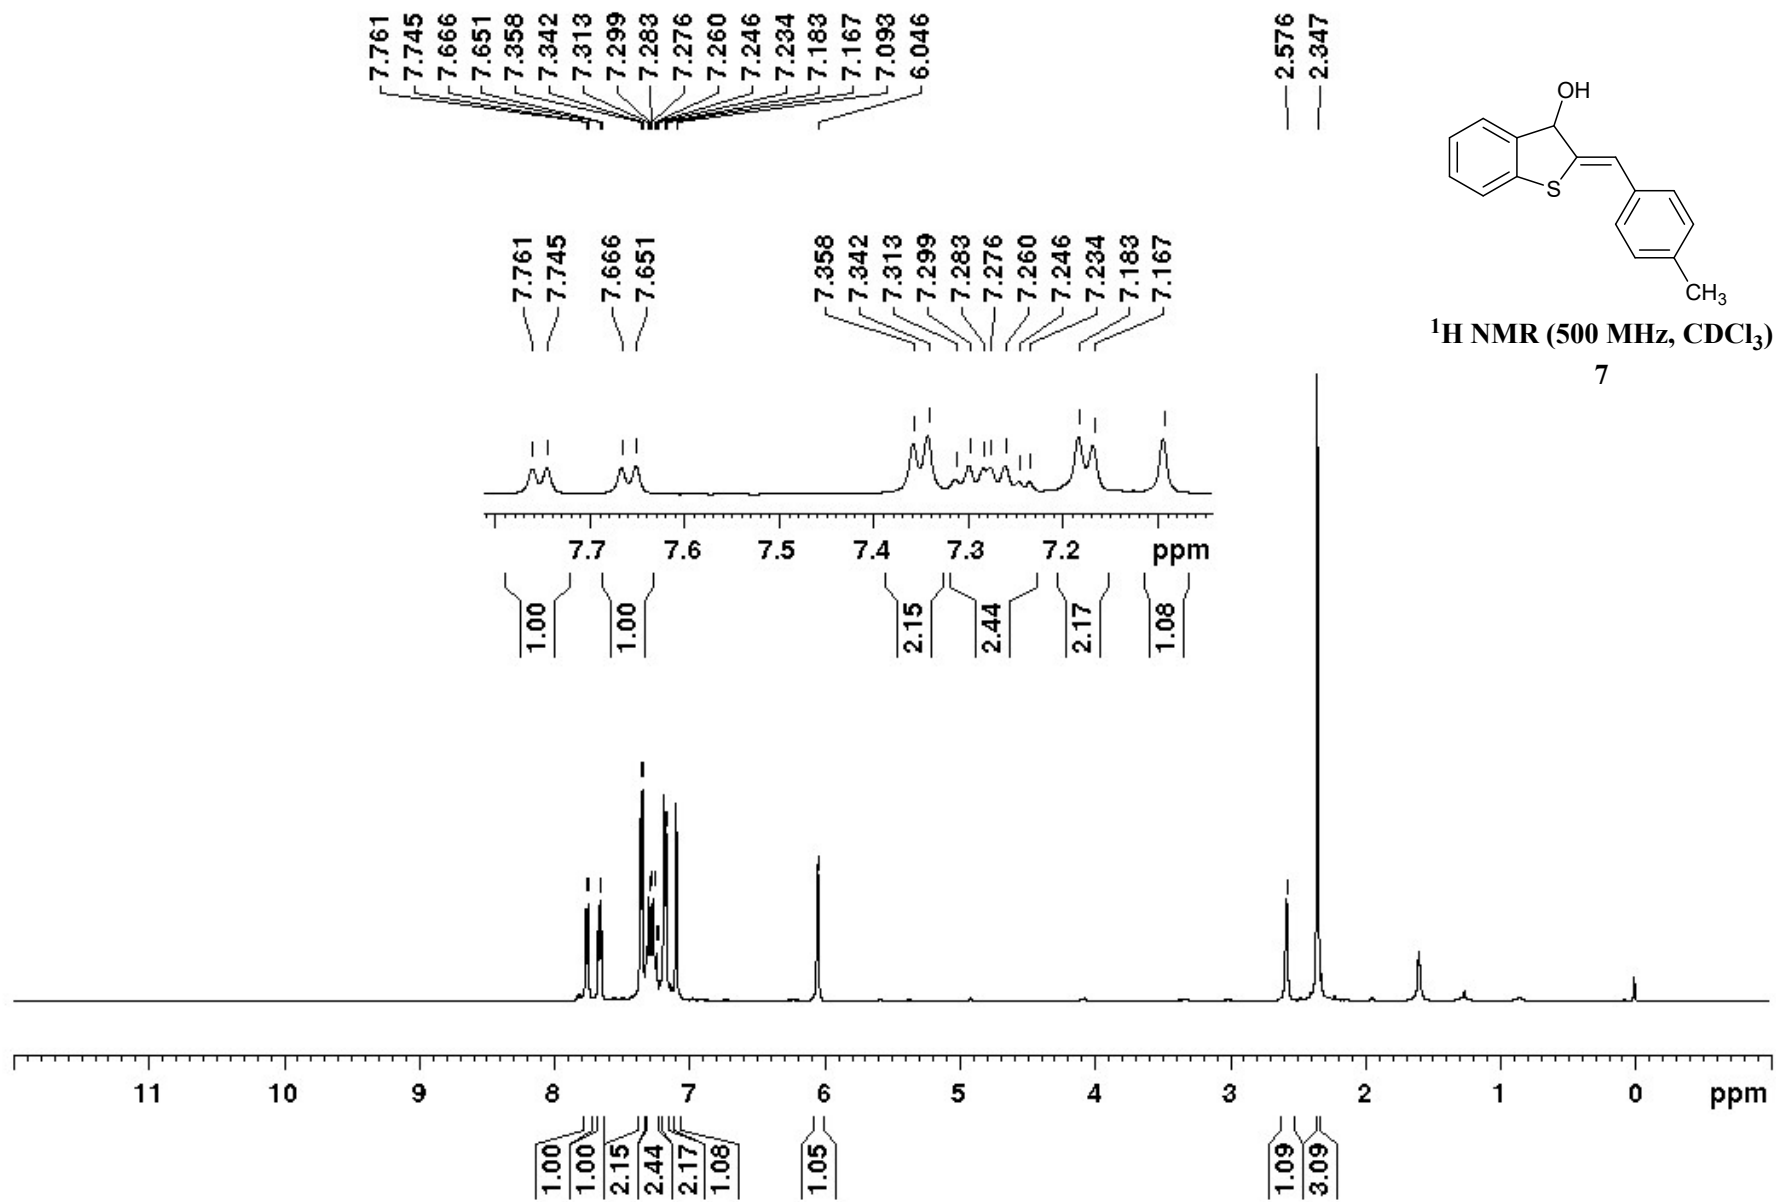

<sup>13</sup>C NMR spectrum of compound 7

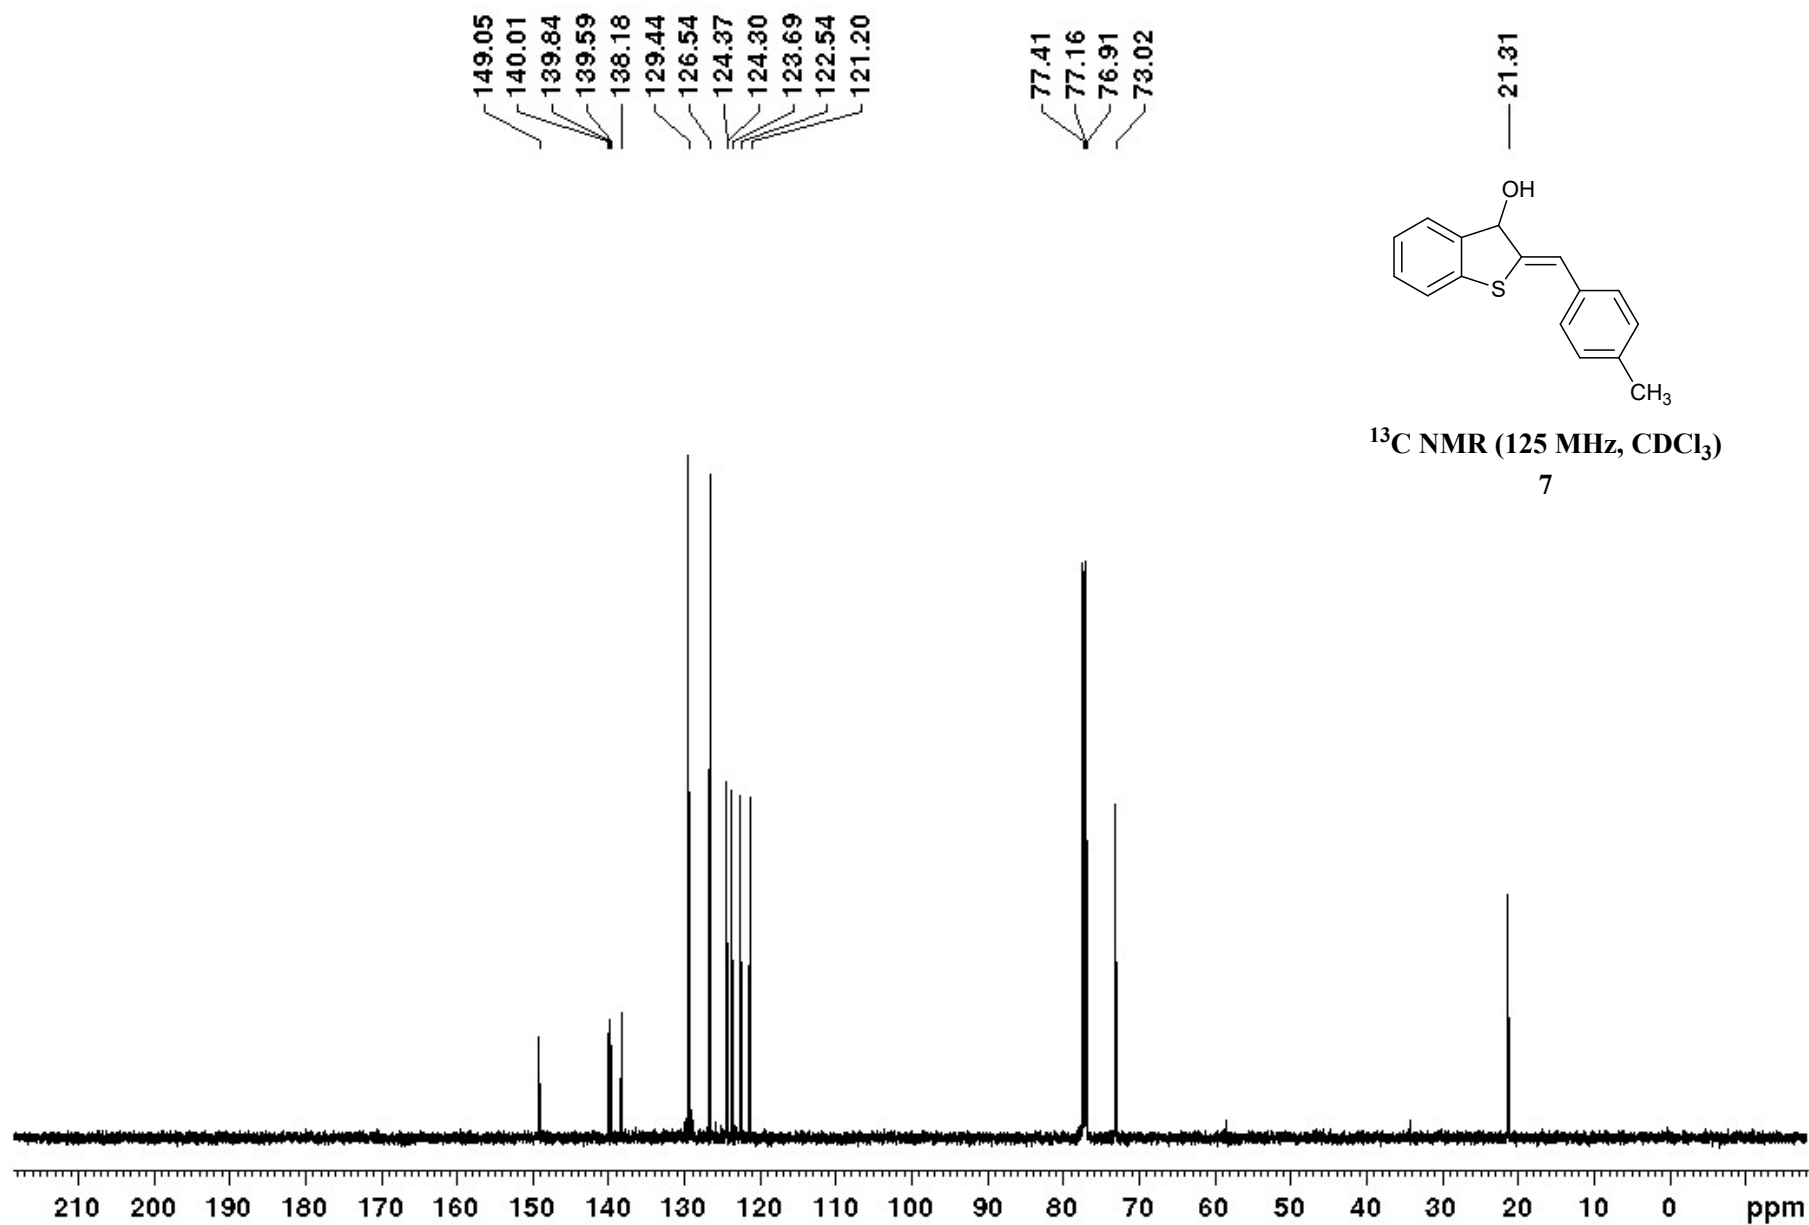

<sup>1</sup>H NMR spectrum of compound 8

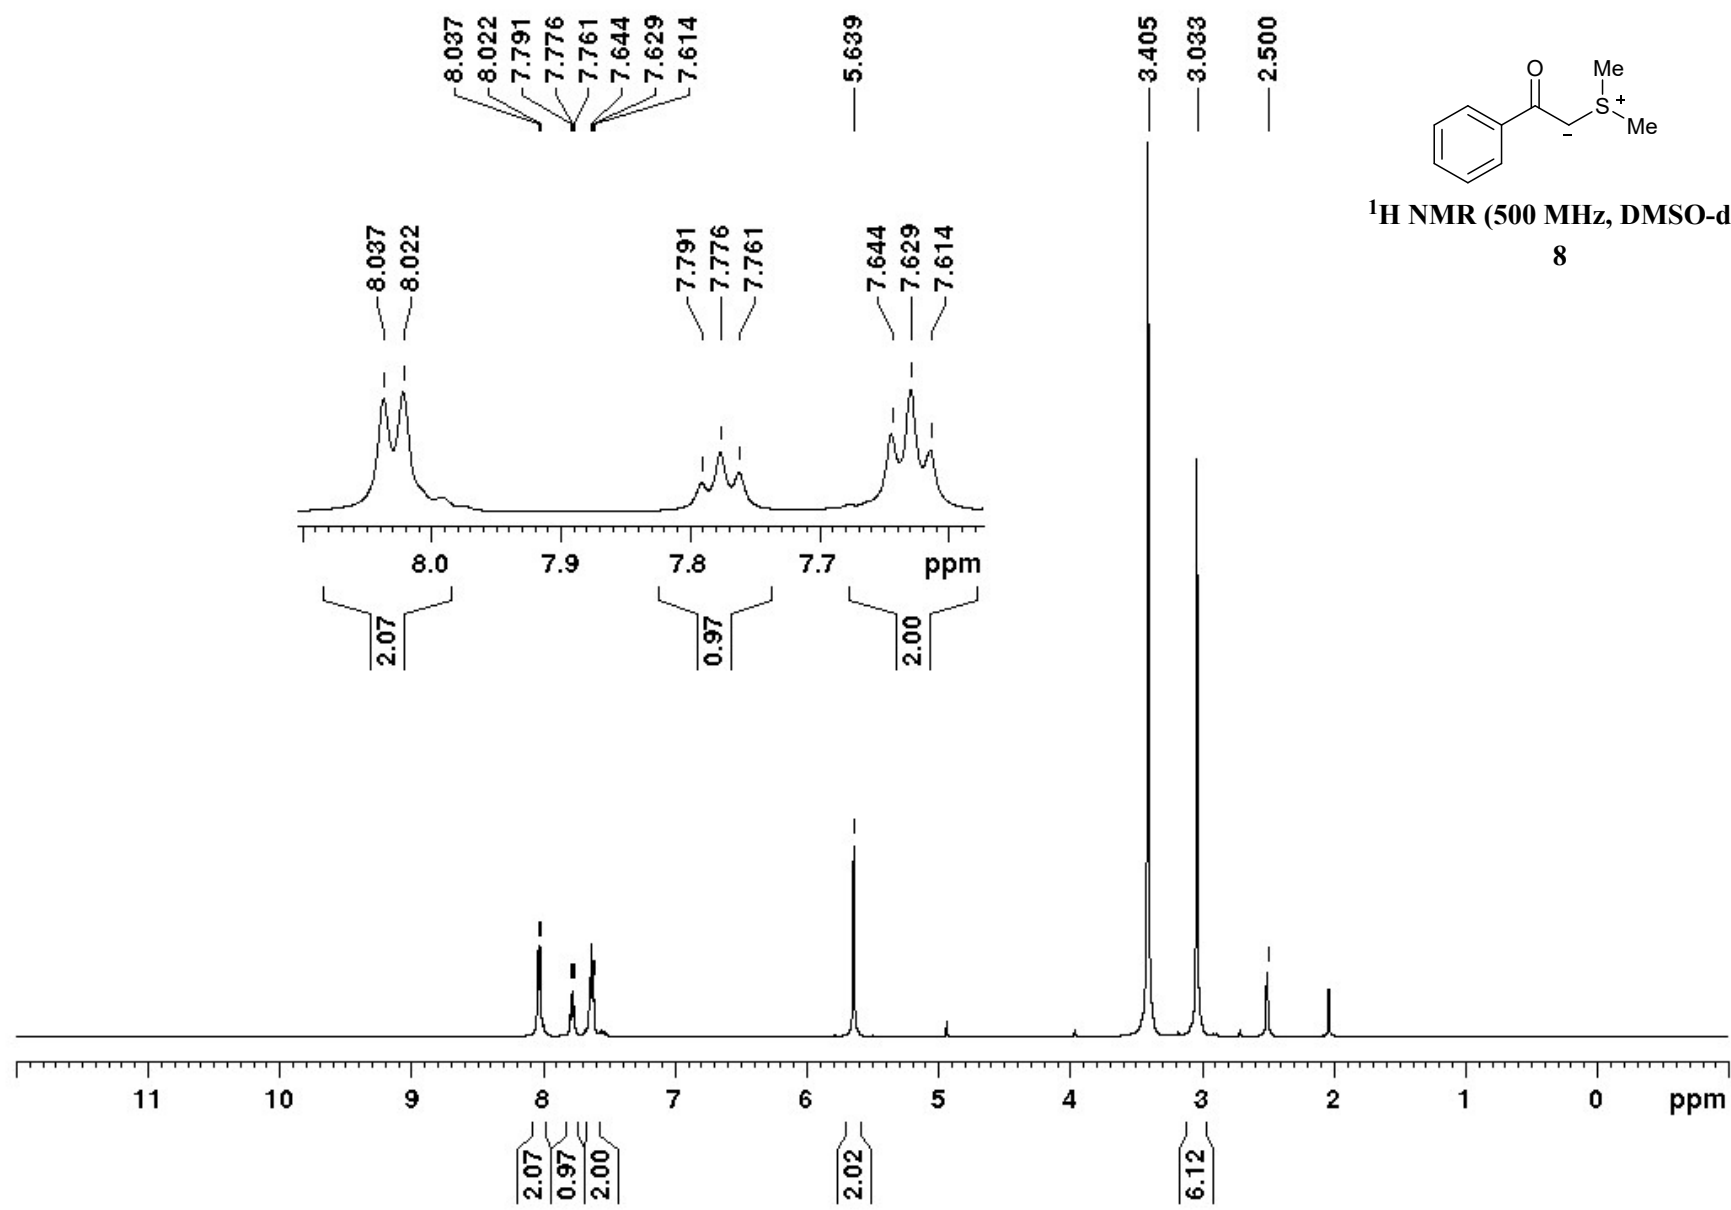

<sup>13</sup>C NMR spectrum of compound 8

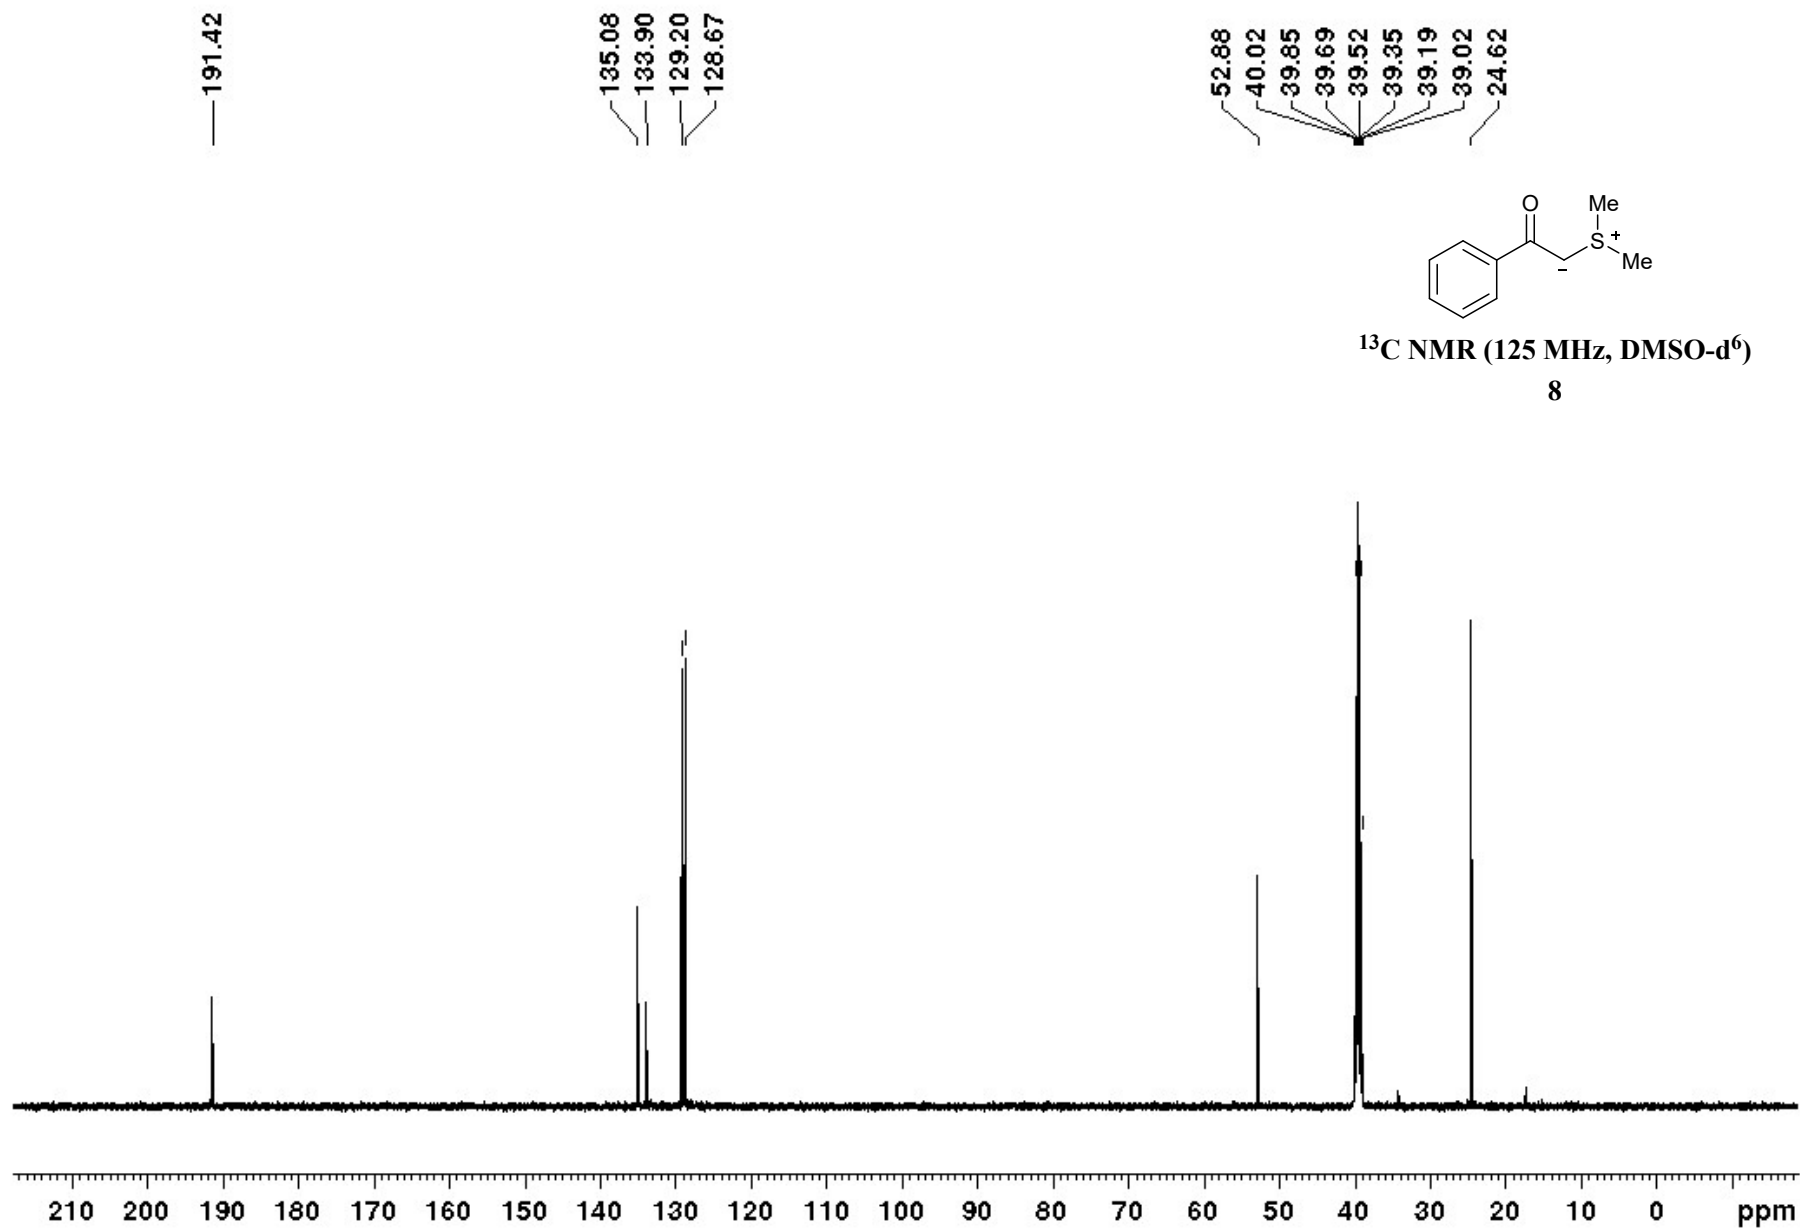



<sup>1</sup>H NMR spectrum of compound 9

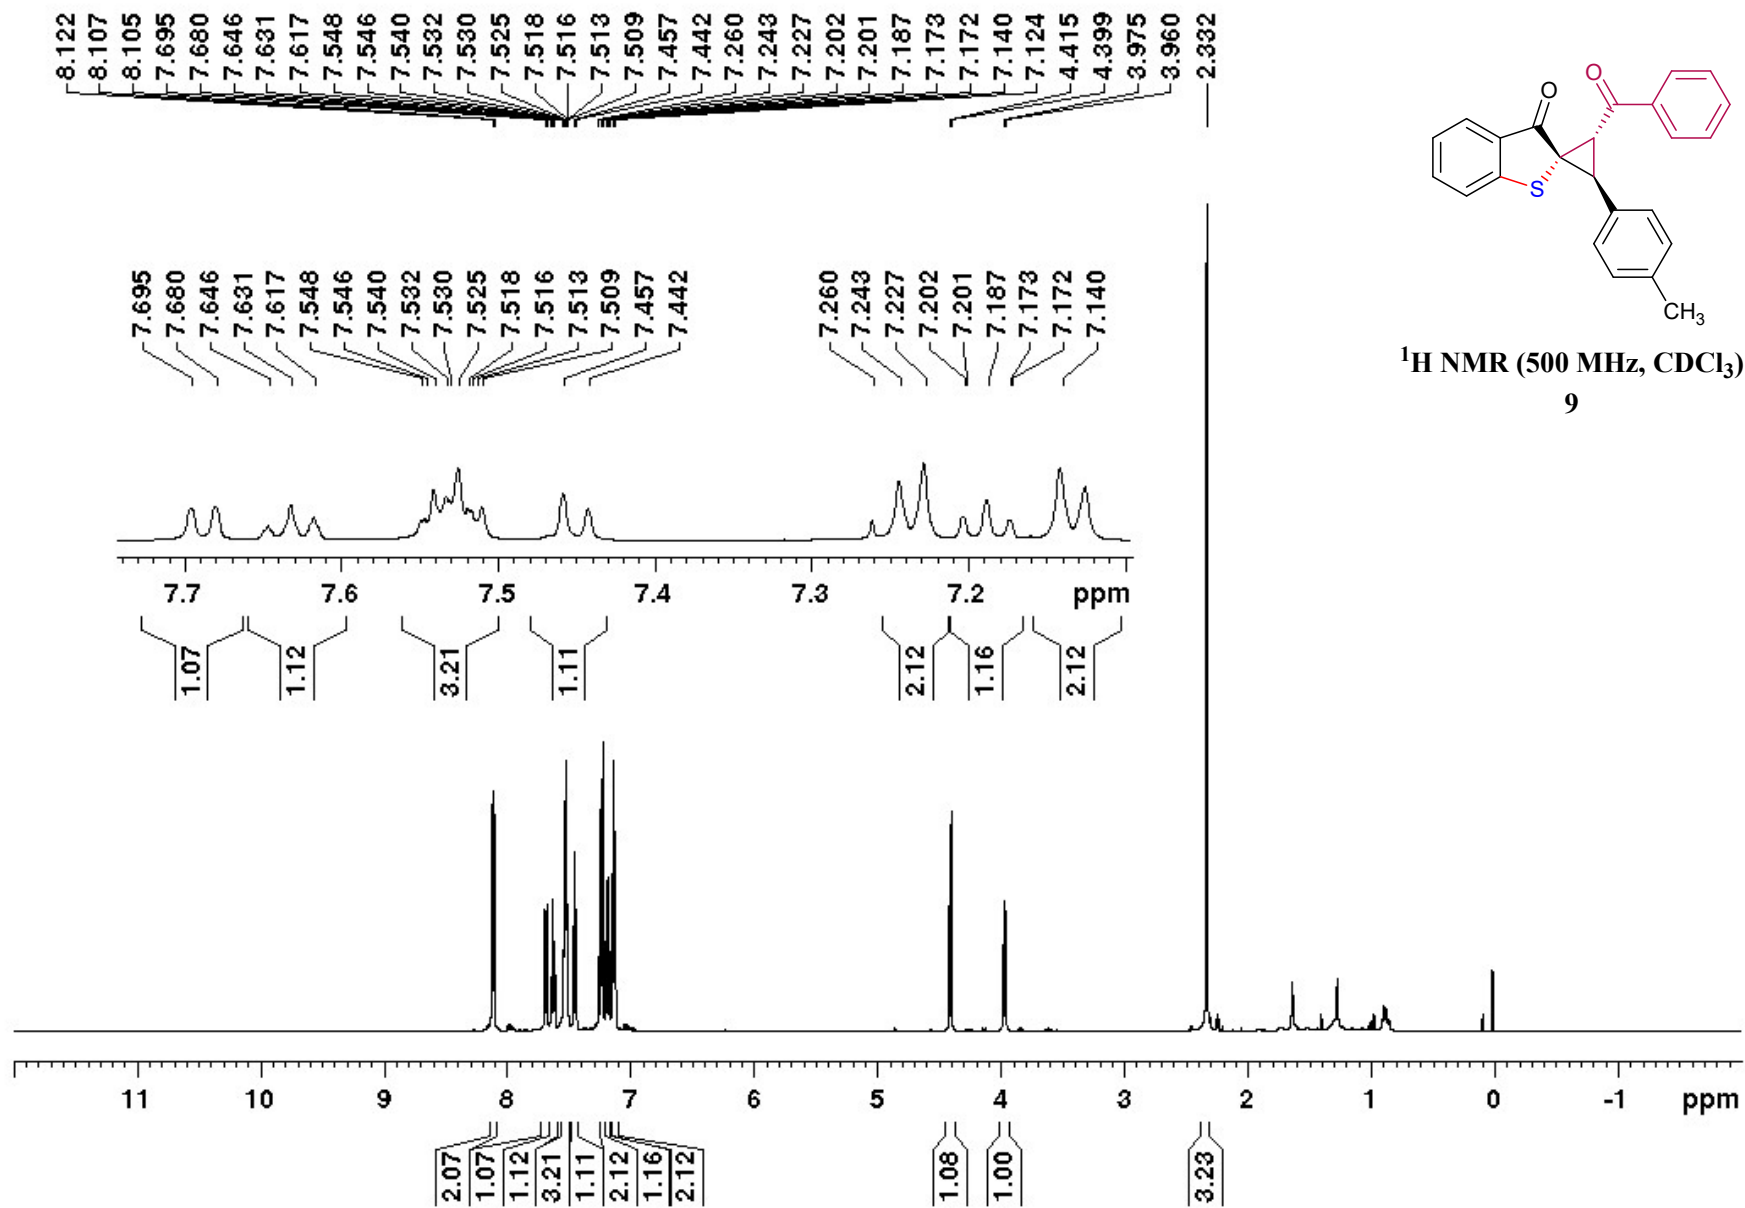

<sup>13</sup>C NMR spectrum of compound 9

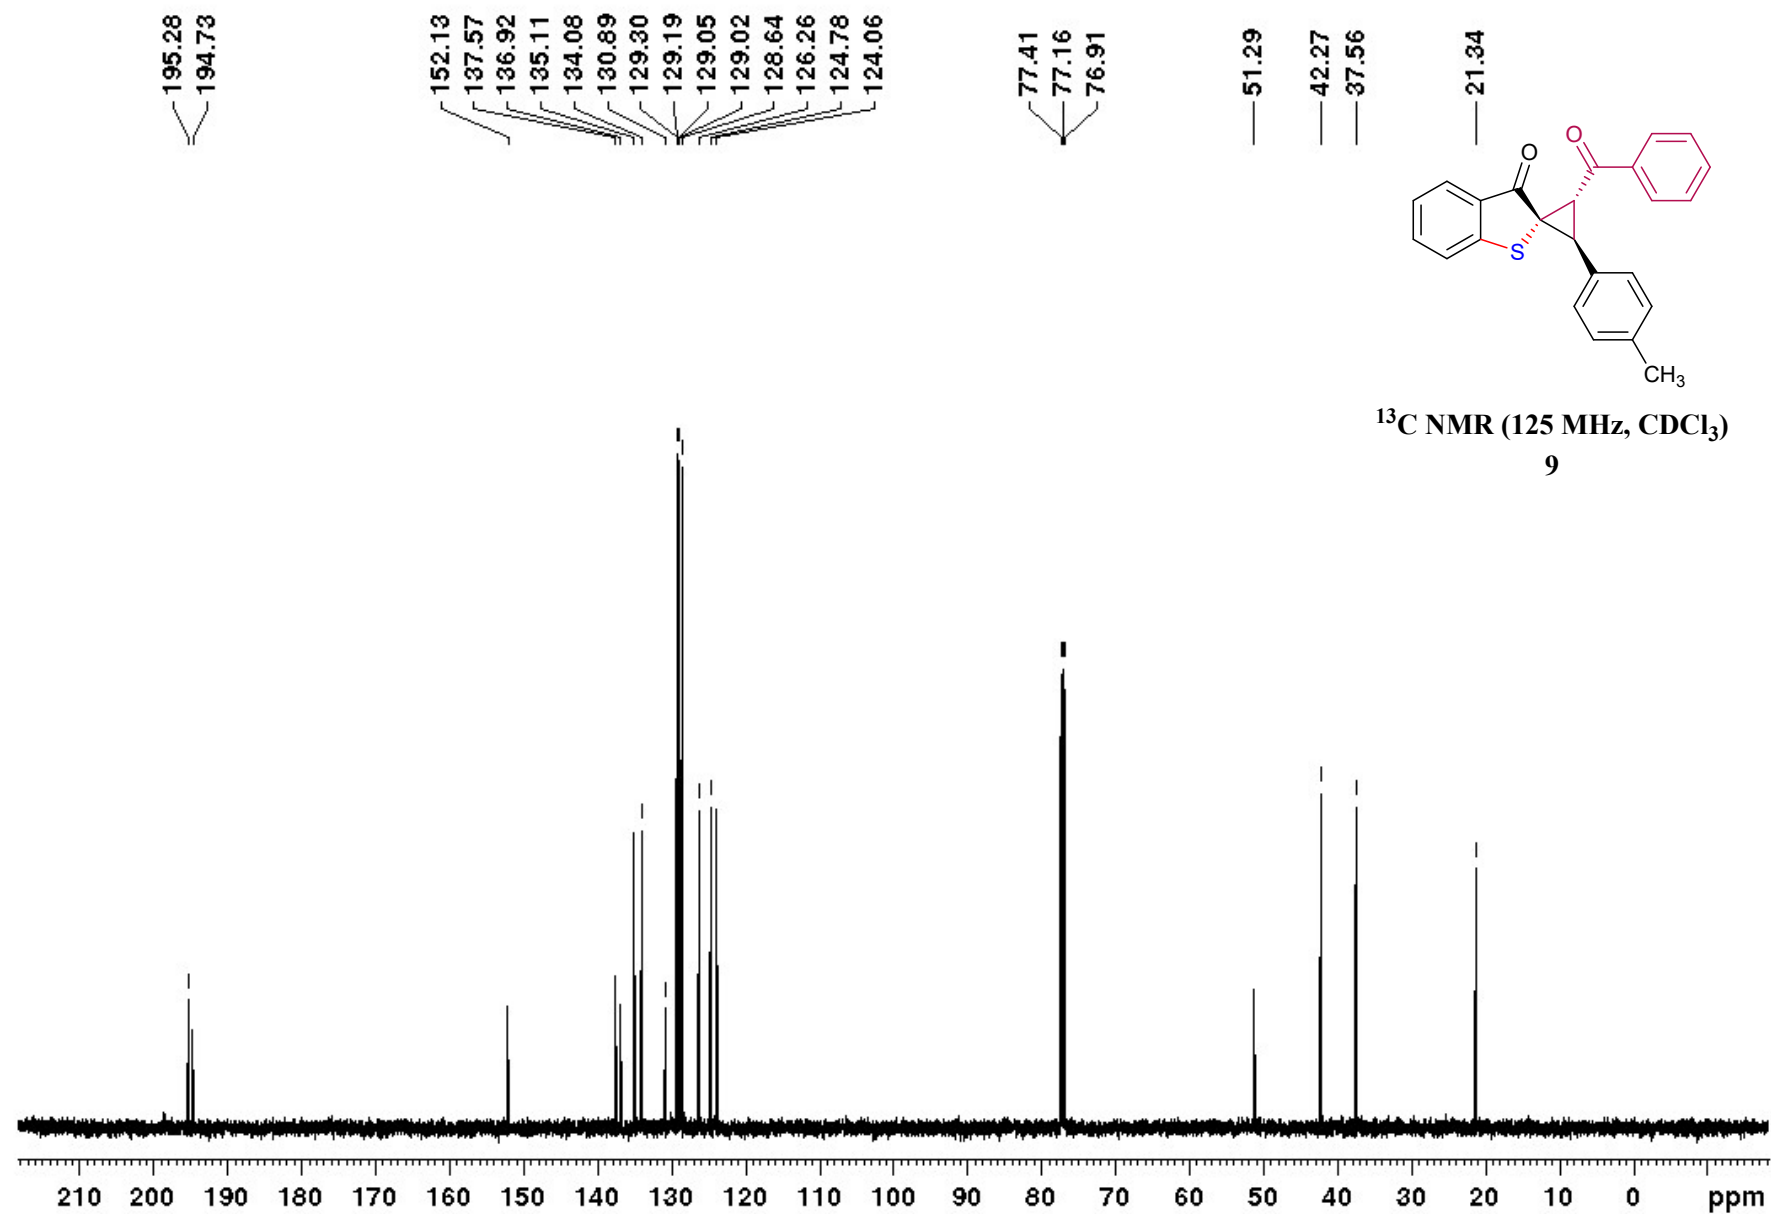

<sup>1</sup>H NMR spectrum of compound 10

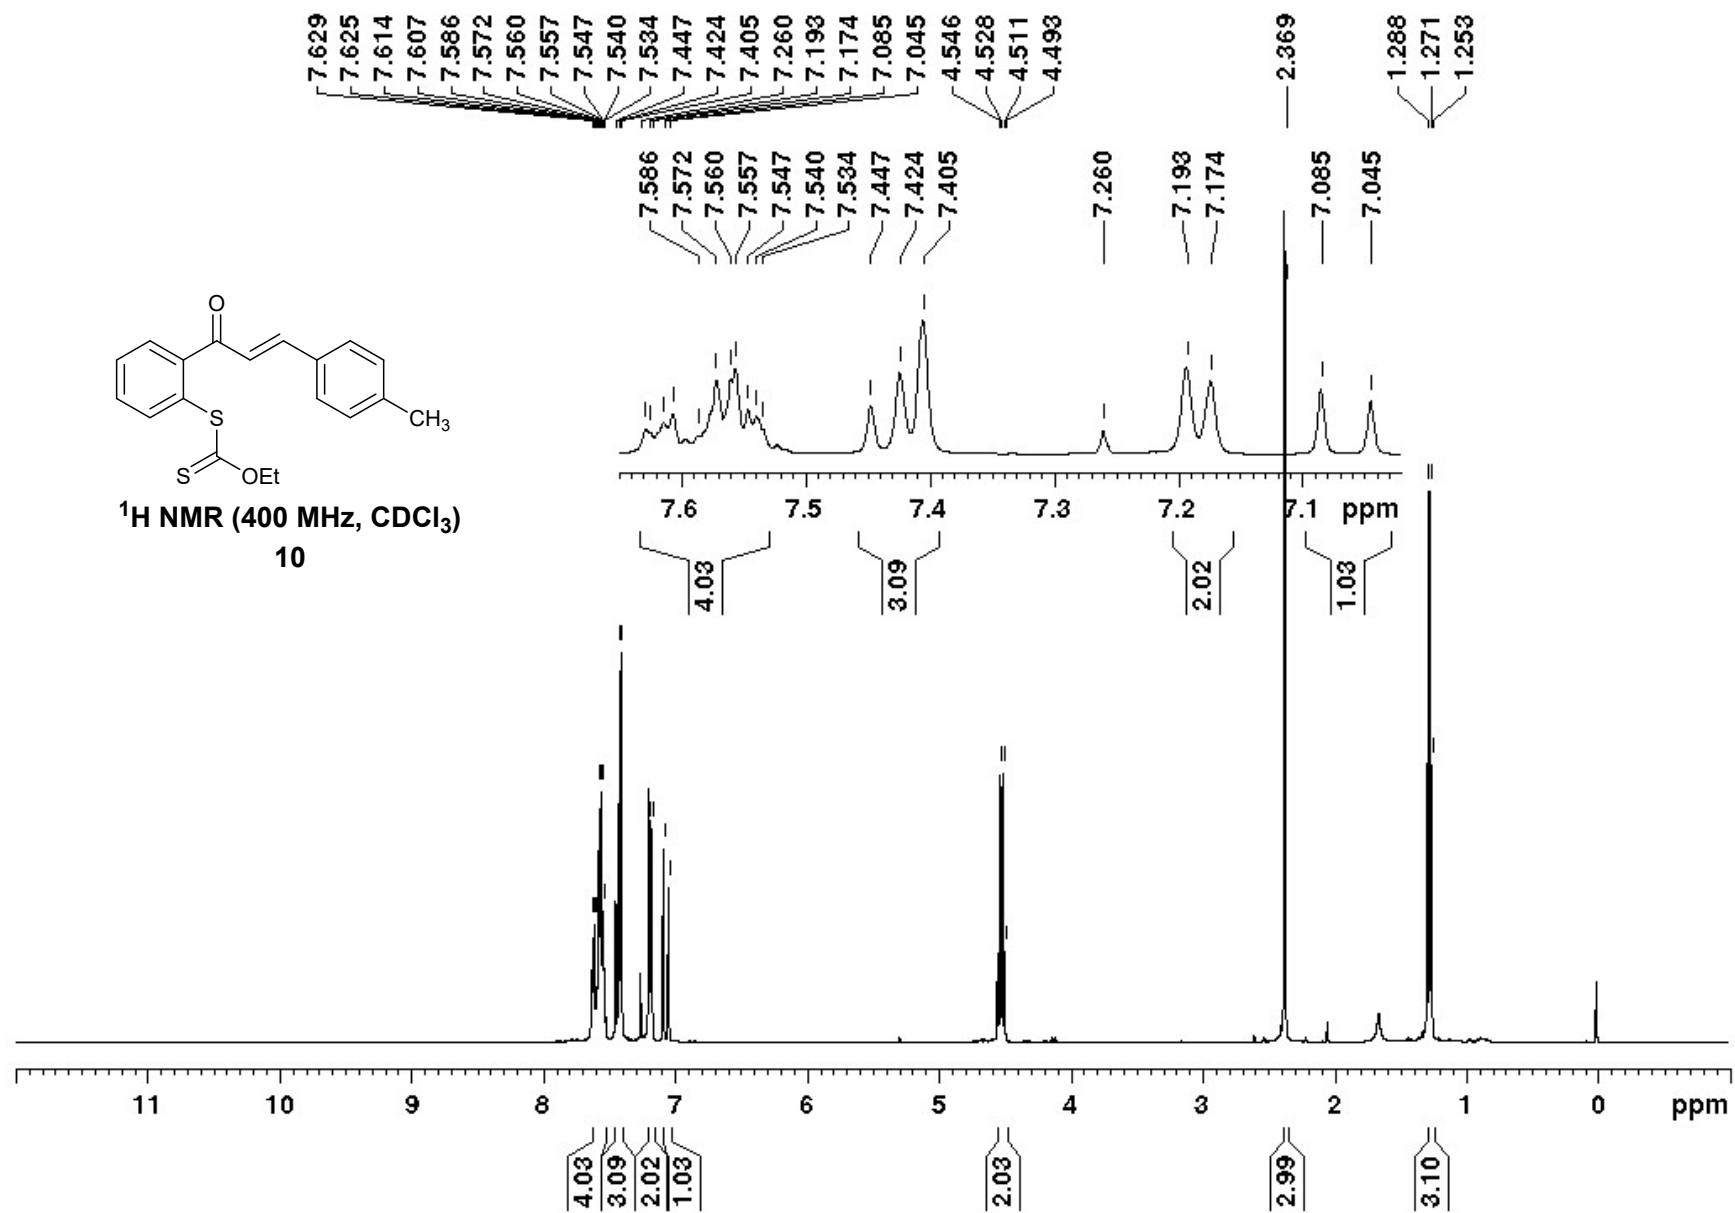

<sup>13</sup>C NMR spectrum of compound 10

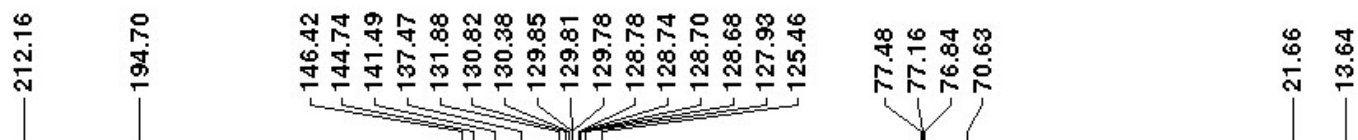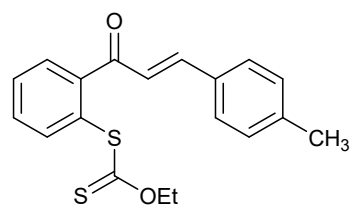

<sup>13</sup>C NMR (101 MHz, CDCl<sub>3</sub>)

10

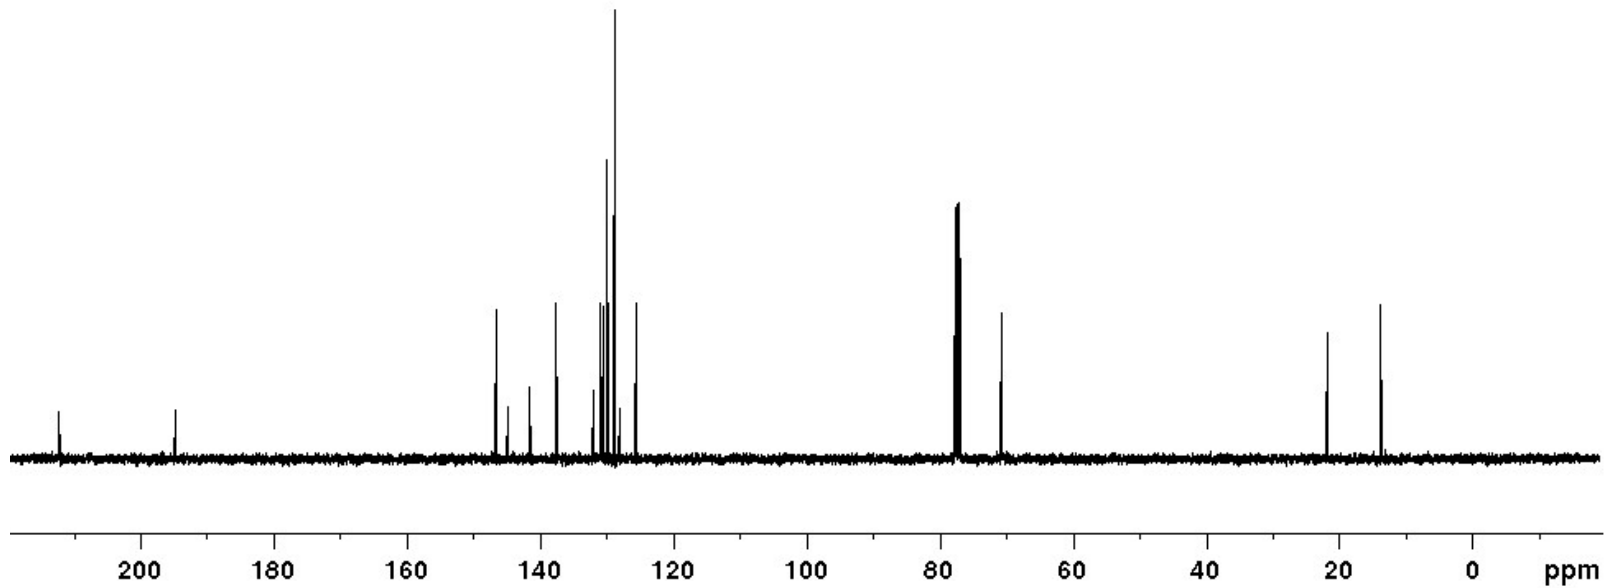

<sup>1</sup>H NMR spectrum of compound 11

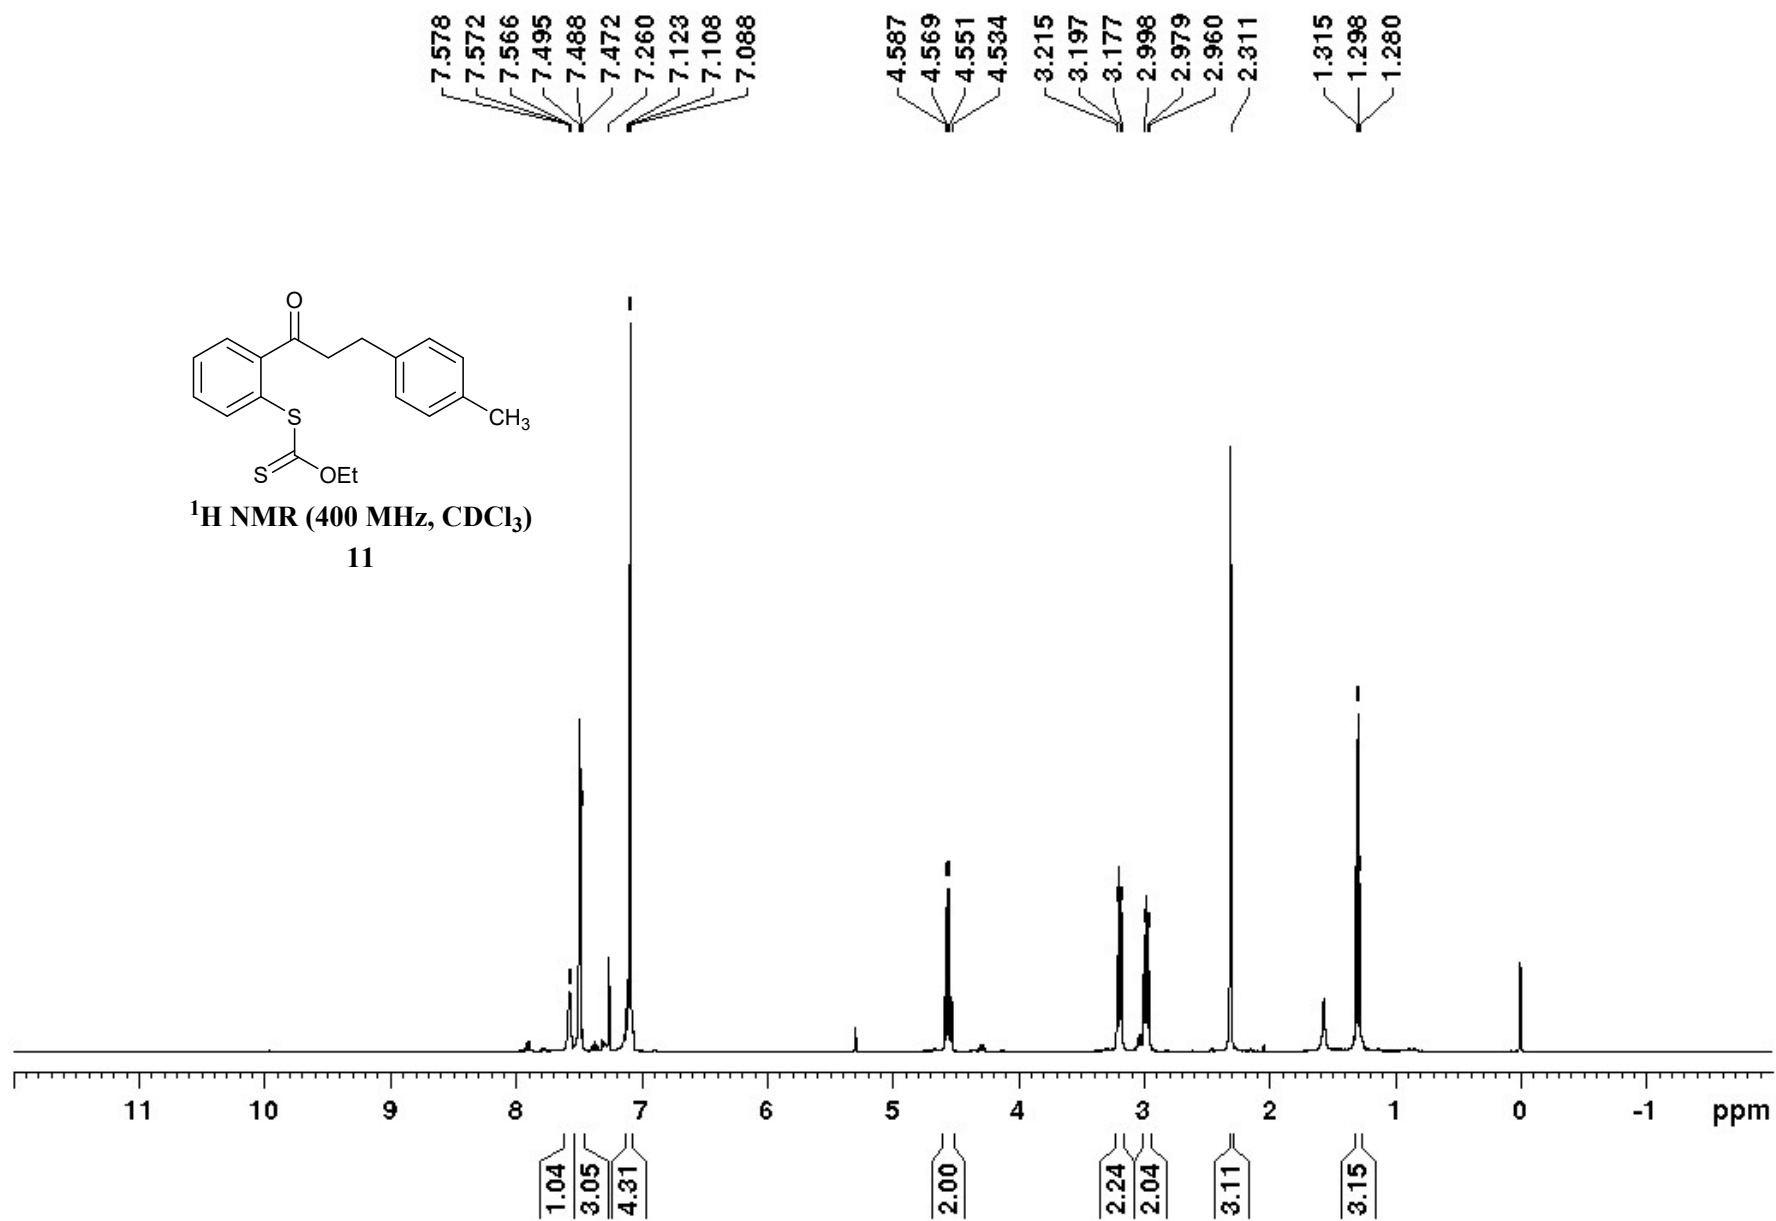



<sup>13</sup>C NMR spectrum of compound 11

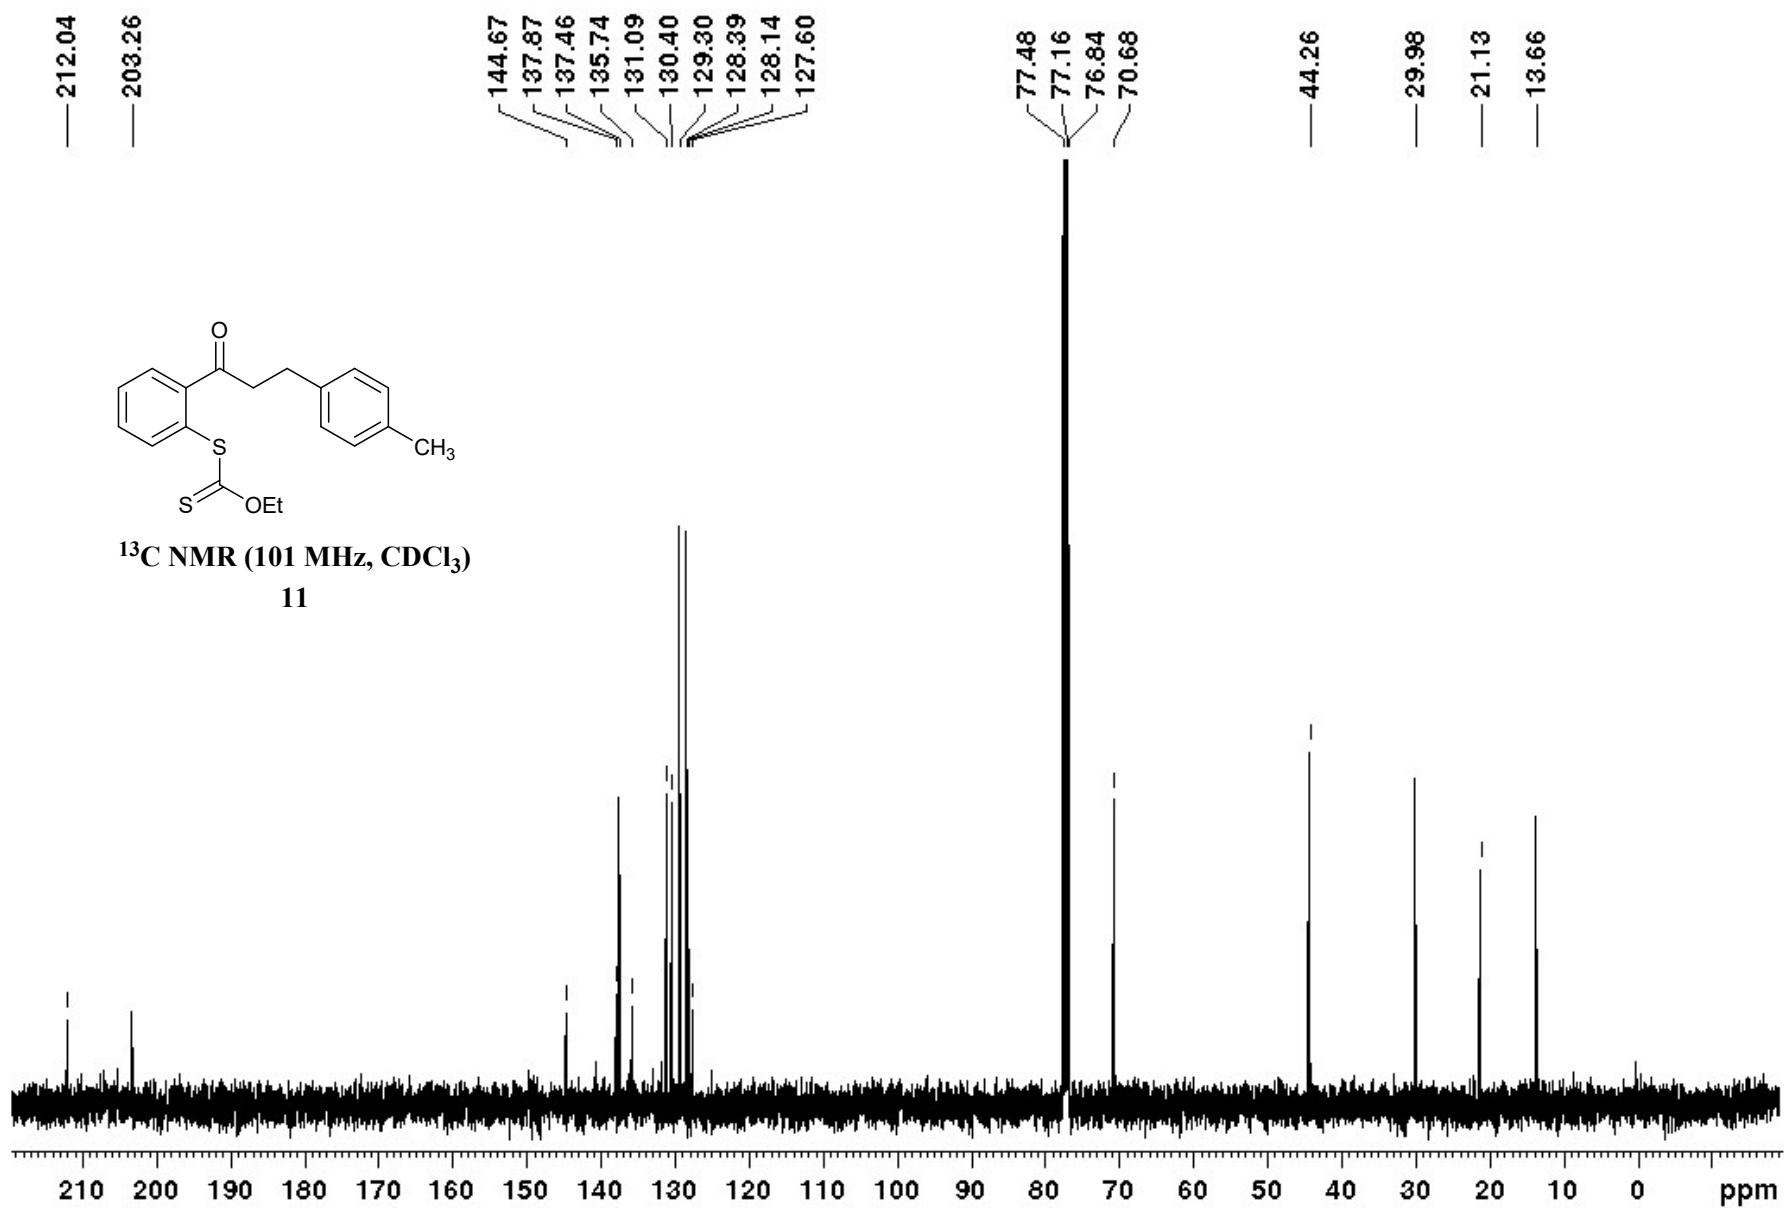

## 6.0. Single crystal XRD data for Compound

Single crystals of (*Z*)-2-(2-methylbenzylidene)benzo[*b*]thiophen-3(2*H*)-one **2i** and (*Z*)-2-(2-chlorobenzylidene)benzo[*b*]thiophen-3(2*H*)-one **2p** and derivatives are suitable for X-ray analysis was obtained by slow evaporation of 0.01 M solution in 1:1 mixture of MeOH:DCM. Thermal ellipsoids are shown at the 50% probability level and hydrogens are omitted for clarity.

### 5.1 XRD Data for Compound **2i** (CCDC No. 2142524)

|                        |                                                          |                                     |
|------------------------|----------------------------------------------------------|-------------------------------------|
| Bond precision:        | C-C = 0.0057 Å                                           | Wavelength=0.71073                  |
| Cell:                  | a=7.0327(12)      b=7.7486(14)      c=11.892(2)          |                                     |
|                        | alpha=84.539(9)      beta=79.040(9)      gamma=76.596(9) |                                     |
| Temperature:           | 296 K                                                    |                                     |
|                        | Calculated                                               | Reported                            |
| Volume                 | 618.00(19)                                               | 617.99(19)                          |
| Space group            | P -1                                                     | P -1                                |
| Hall group             | -P 1                                                     | -P 1                                |
| Moiety formula         | C <sub>16</sub> H <sub>12</sub> O S                      | ?                                   |
| Sum formula            | C <sub>16</sub> H <sub>12</sub> O S                      | C <sub>16</sub> H <sub>12</sub> O S |
| Mr                     | 252.32                                                   | 252.32                              |
| Dx, g cm <sup>-3</sup> | 1.356                                                    | 1.356                               |
| Z                      | 2                                                        | 2                                   |
| Mu (mm <sup>-1</sup> ) | 0.245                                                    | 0.245                               |
| F000                   | 264.0                                                    | 264.0                               |
| F000'                  | 264.35                                                   |                                     |
| h,k,lmax               | 8,9,14                                                   | 8,9,14                              |
| Nref                   | 2176                                                     | 2173                                |
| Tmin,Tmax              | 0.937,0.976                                              | 0.935,0.976                         |
| Tmin'                  | 0.934                                                    |                                     |
| Correction method=     | # Reported T Limits: Tmin=0.935 Tmax=0.976               |                                     |
| AbsCorr =              | MULTI-SCAN                                               |                                     |
| Data completeness=     | 0.999                                                    | Theta(max)= 24.998                  |
| R(reflections)=        | 0.0792( 1503)                                            | wR2(reflections)= 0.2405(2173)      |
| S =                    | 1.013                                                    | Npar= 164                           |



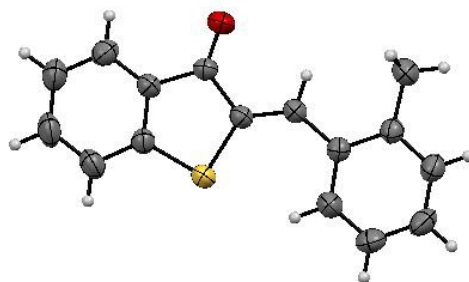

**Figure S1.** Single-crystal X-ray structure of compound **2i** (CCDC No. 2142524) Ellipsoids represent 50% probability level.

### 5.2 XRD Data for Compound **2p** (CCDC No. 2142521)

|                        |                                                 |                                       |
|------------------------|-------------------------------------------------|---------------------------------------|
| Bond precision:        | C-C = 0.0054 Å                                  | Wavelength=0.71073                    |
| Cell:                  | a=21.345(3)      b=3.9444(5)      c=14.7541(19) |                                       |
|                        | alpha=90      beta=100.455(5)      gamma=90     |                                       |
| Temperature:           | 296 K                                           |                                       |
|                        | Calculated                                      | Reported                              |
| Volume                 | 1221.6(3)                                       | 1221.6(3)                             |
| Space group            | C c                                             | C c                                   |
| Hall group             | C -2yc                                          | C -2yc                                |
| Moiety formula         | C <sub>15</sub> H <sub>9</sub> Cl O S?          |                                       |
| Sum formula            | C <sub>15</sub> H <sub>9</sub> Cl O S           | C <sub>15</sub> H <sub>9</sub> Cl O S |
| Mr                     | 272.73                                          | 272.73                                |
| Dx, g cm <sup>-3</sup> | 1.483                                           | 1.483                                 |
| Z                      | 4                                               |                                       |
| Mu (mm <sup>-1</sup> ) | 0.465                                           | 0.465                                 |
| F000                   | 560.0                                           | 560.0                                 |
| F000'                  | 561.28                                          |                                       |
| h,k,lmax               | 24,4,17                                         | 24,4,17                               |
| Nref                   | 2160 [ 1081]                                    | 1747                                  |
| Tmin,Tmax              | 0.890,0.933                                     |                                       |
| Tmin'                  | 0.890                                           |                                       |
| Correction method=     | Not given                                       |                                       |
| Data completeness=     | 1.62/0.81                                       | Theta(max)= 24.989                    |
| R(reflections)=        | 0.0278( 1614)                                   | wR2(reflections)= 0.0614( 1747)       |
| S =                    | 1.041                                           | Npar= 163                             |

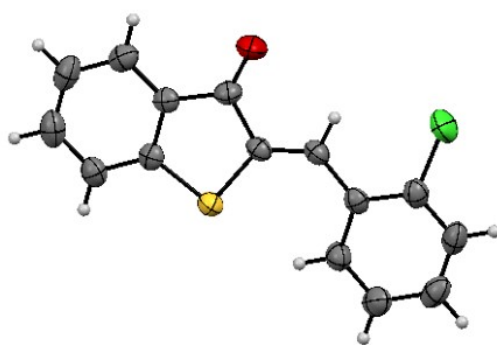

**Figure S1.** Single-crystal X-ray structure of compound **2i** (CCDC No. 2142521) Ellipsoids represent 50% probability level.
